# Supplementary material for: Proteomic Candidate Biomarkers of Drug-Induced Nephrotoxicity in the Rat
Source: PubMed Central journal article supplement (PMC3324487; doi:10.1371/journal.pone.0034606), 2012-04-11

ID 2233

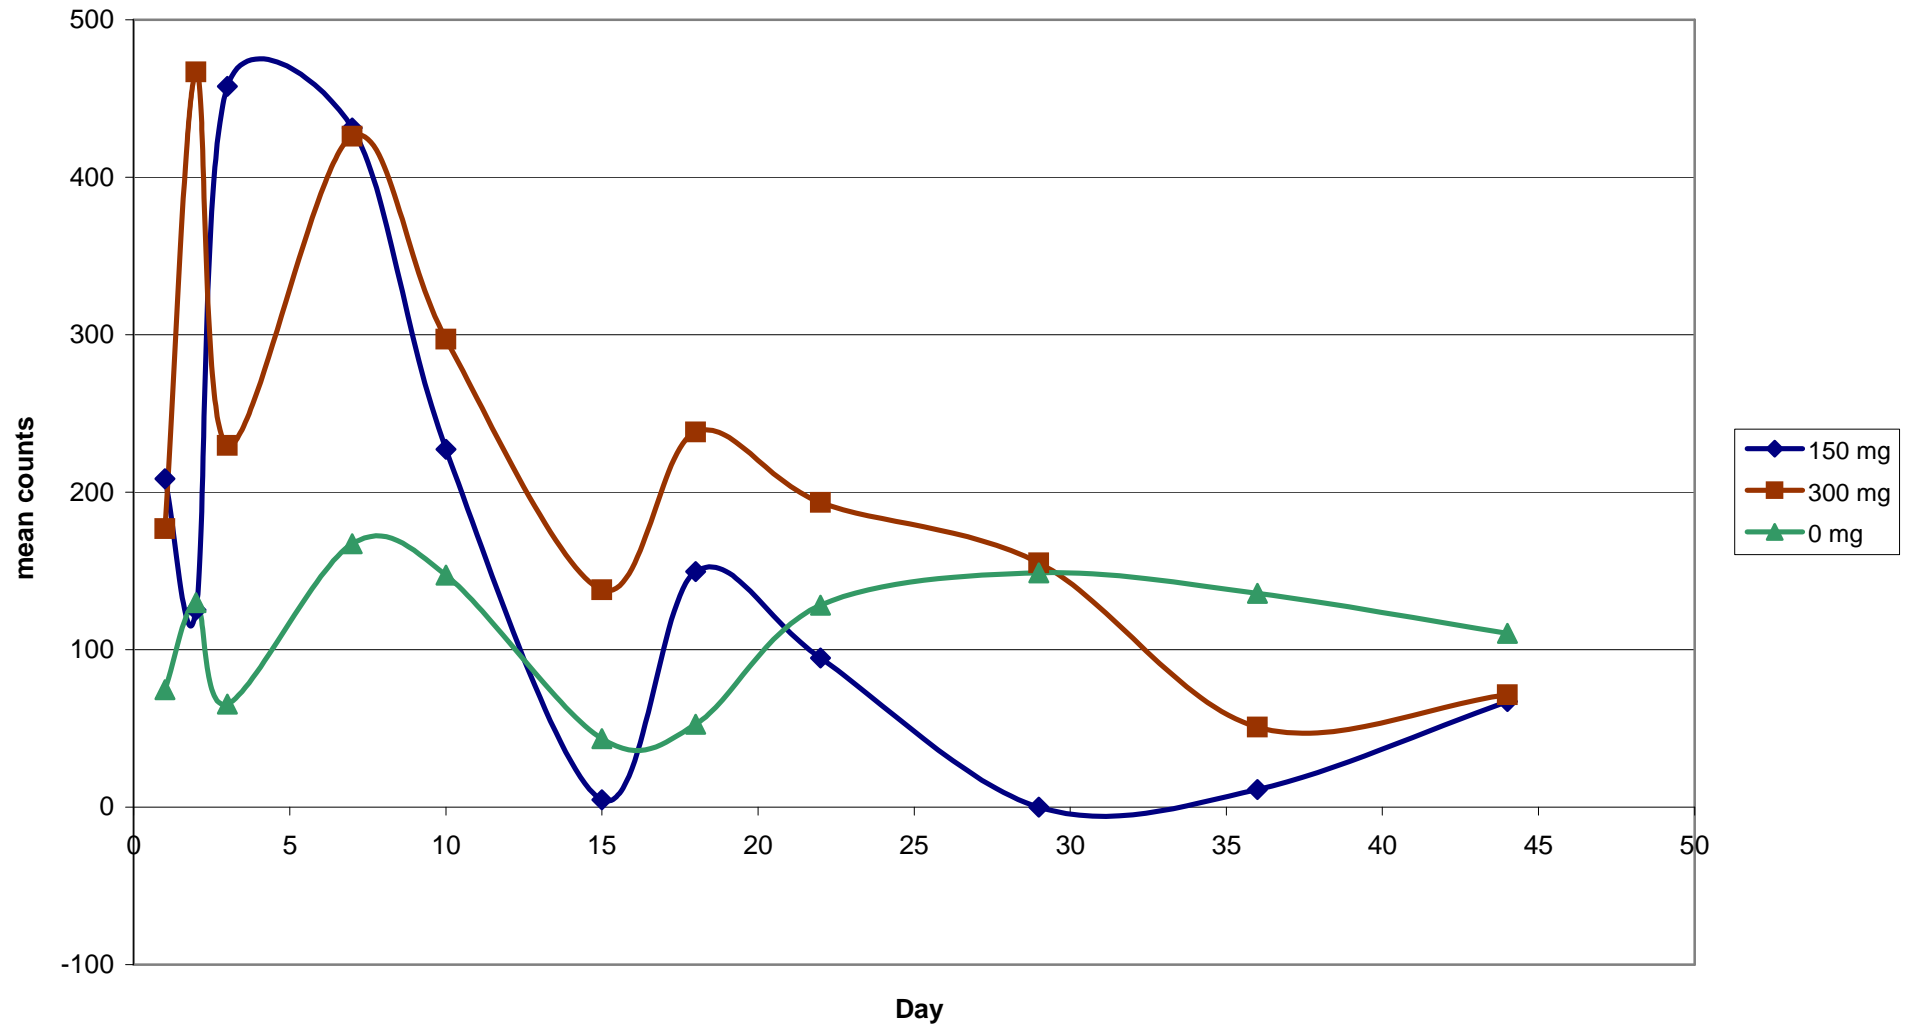

ID 3166

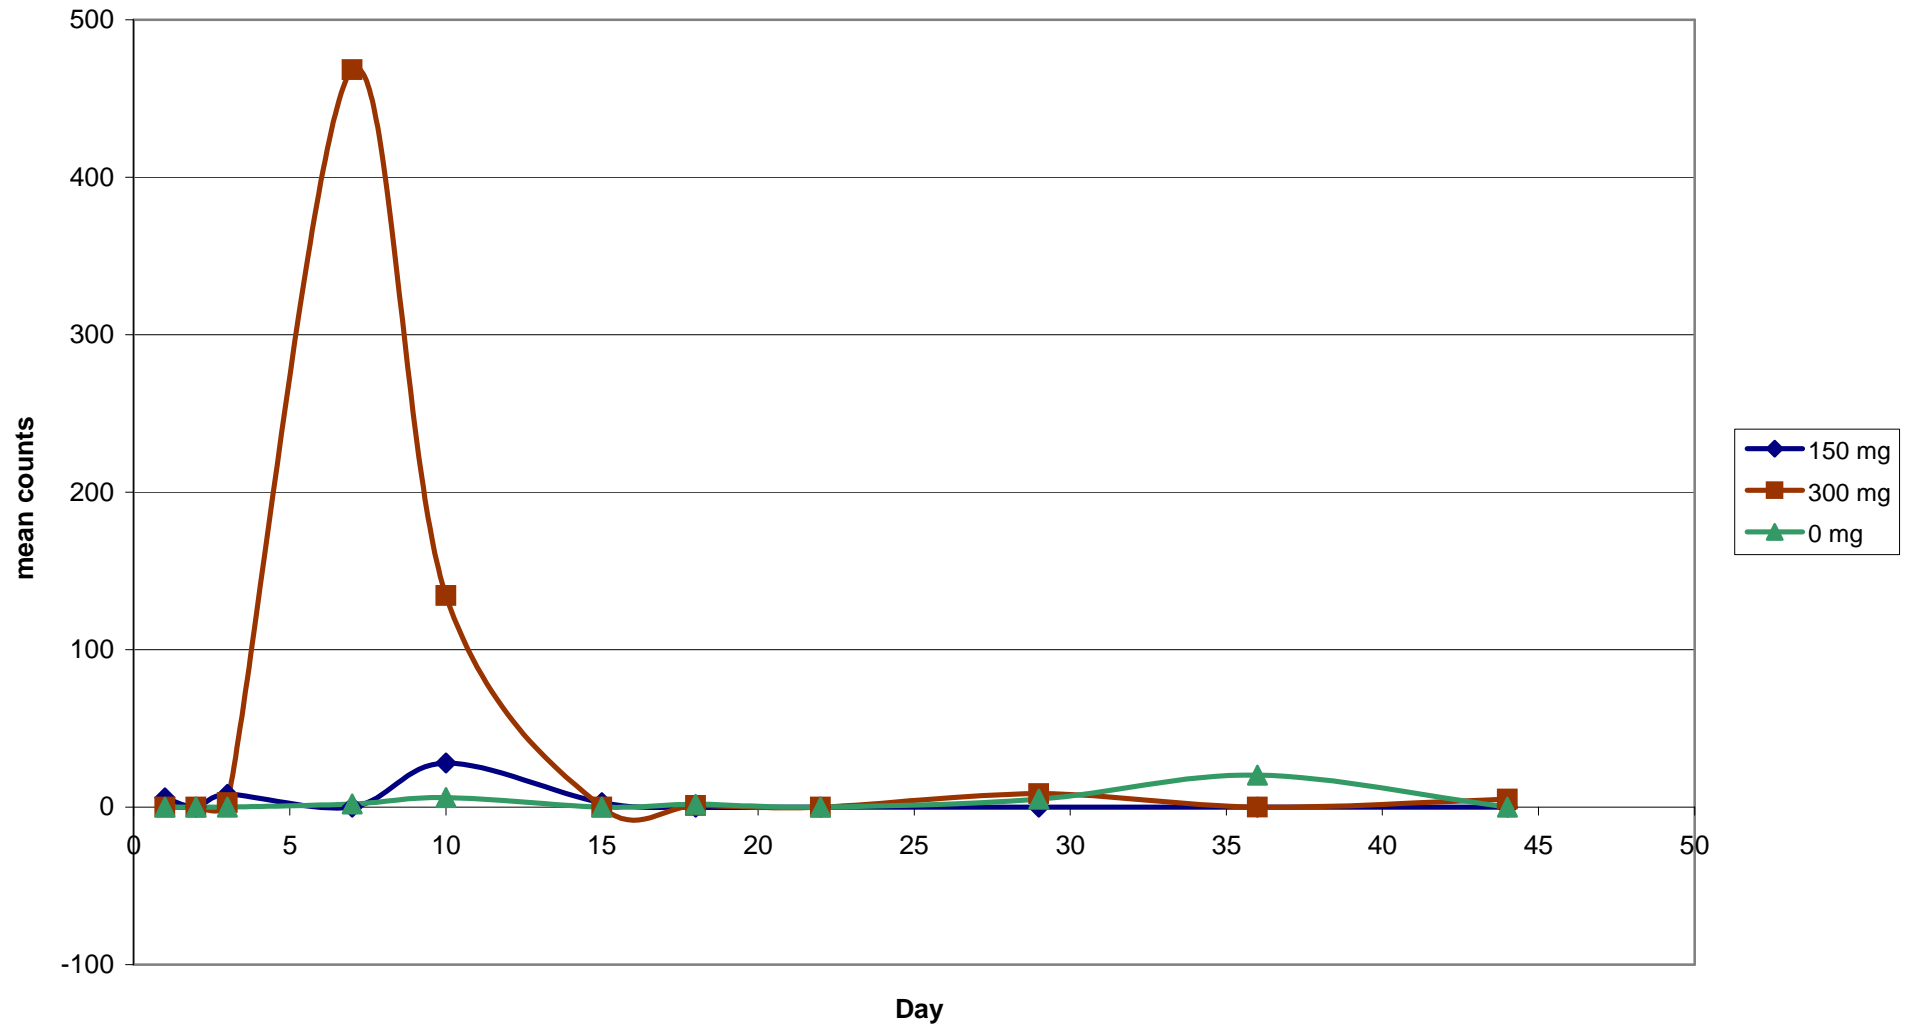

ID 4119

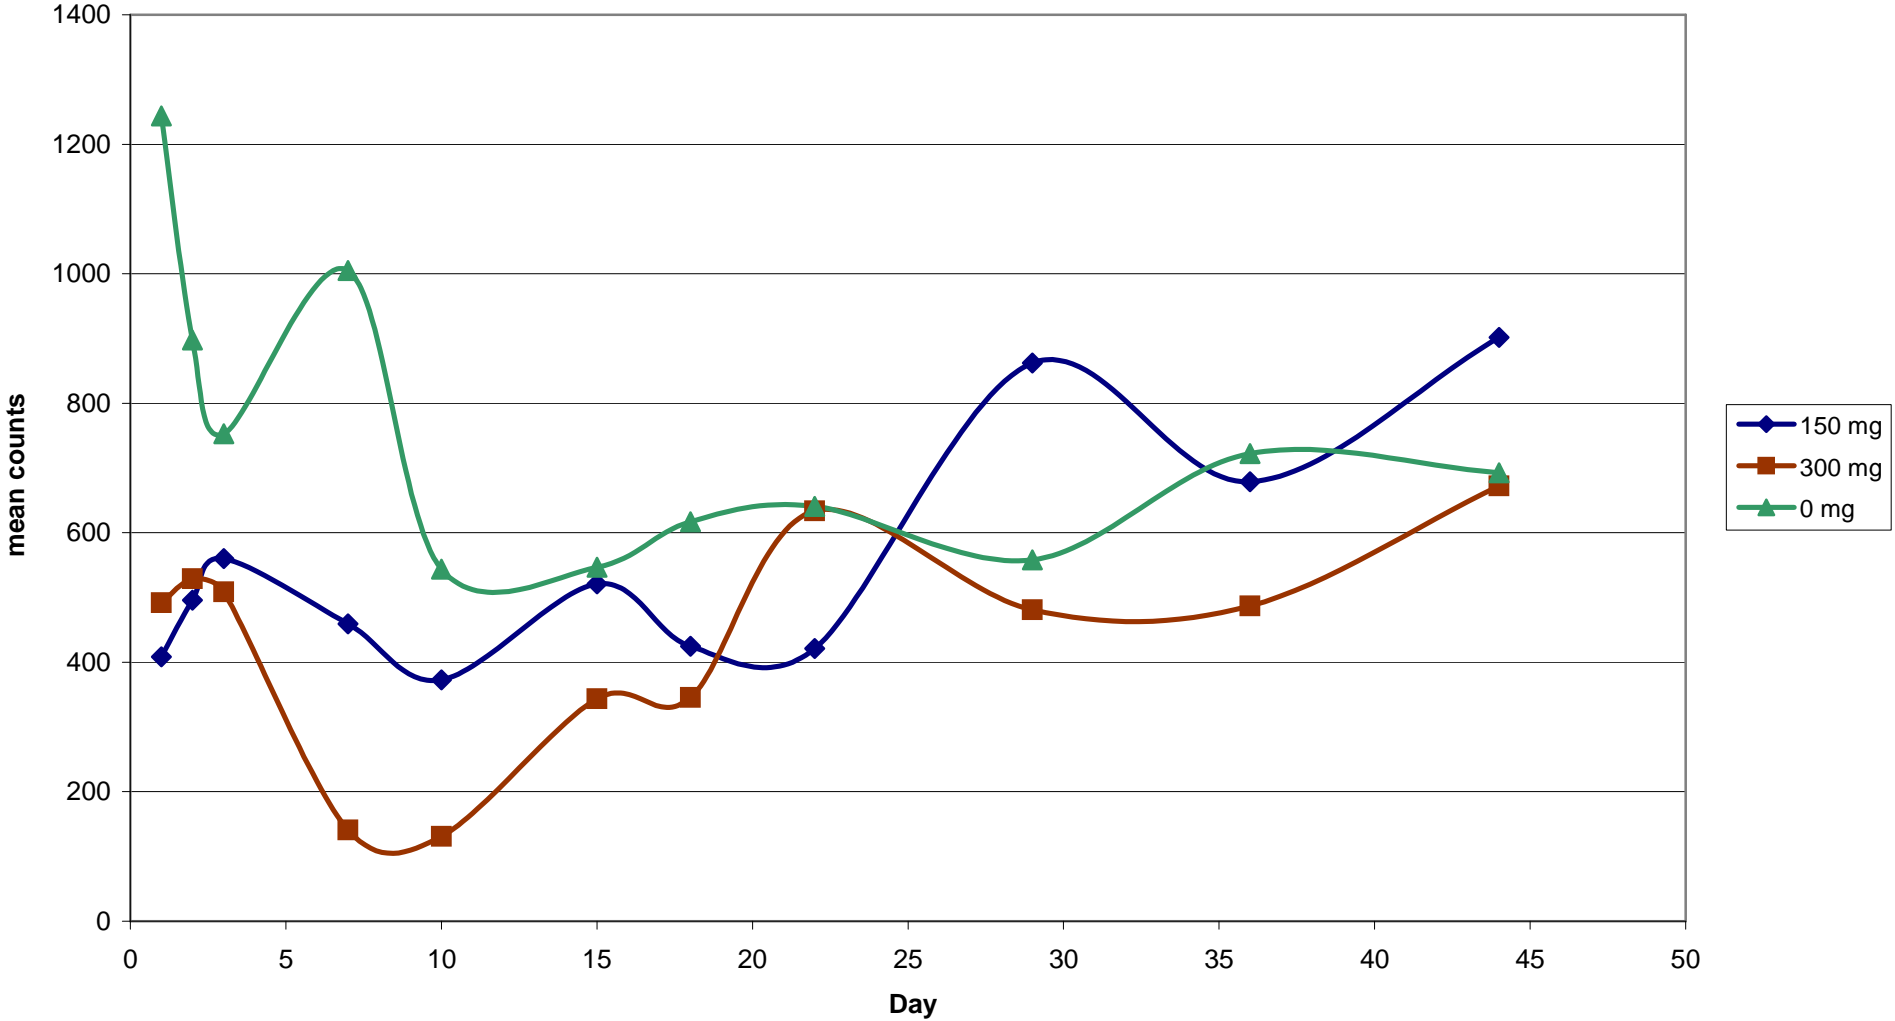

ID 5607

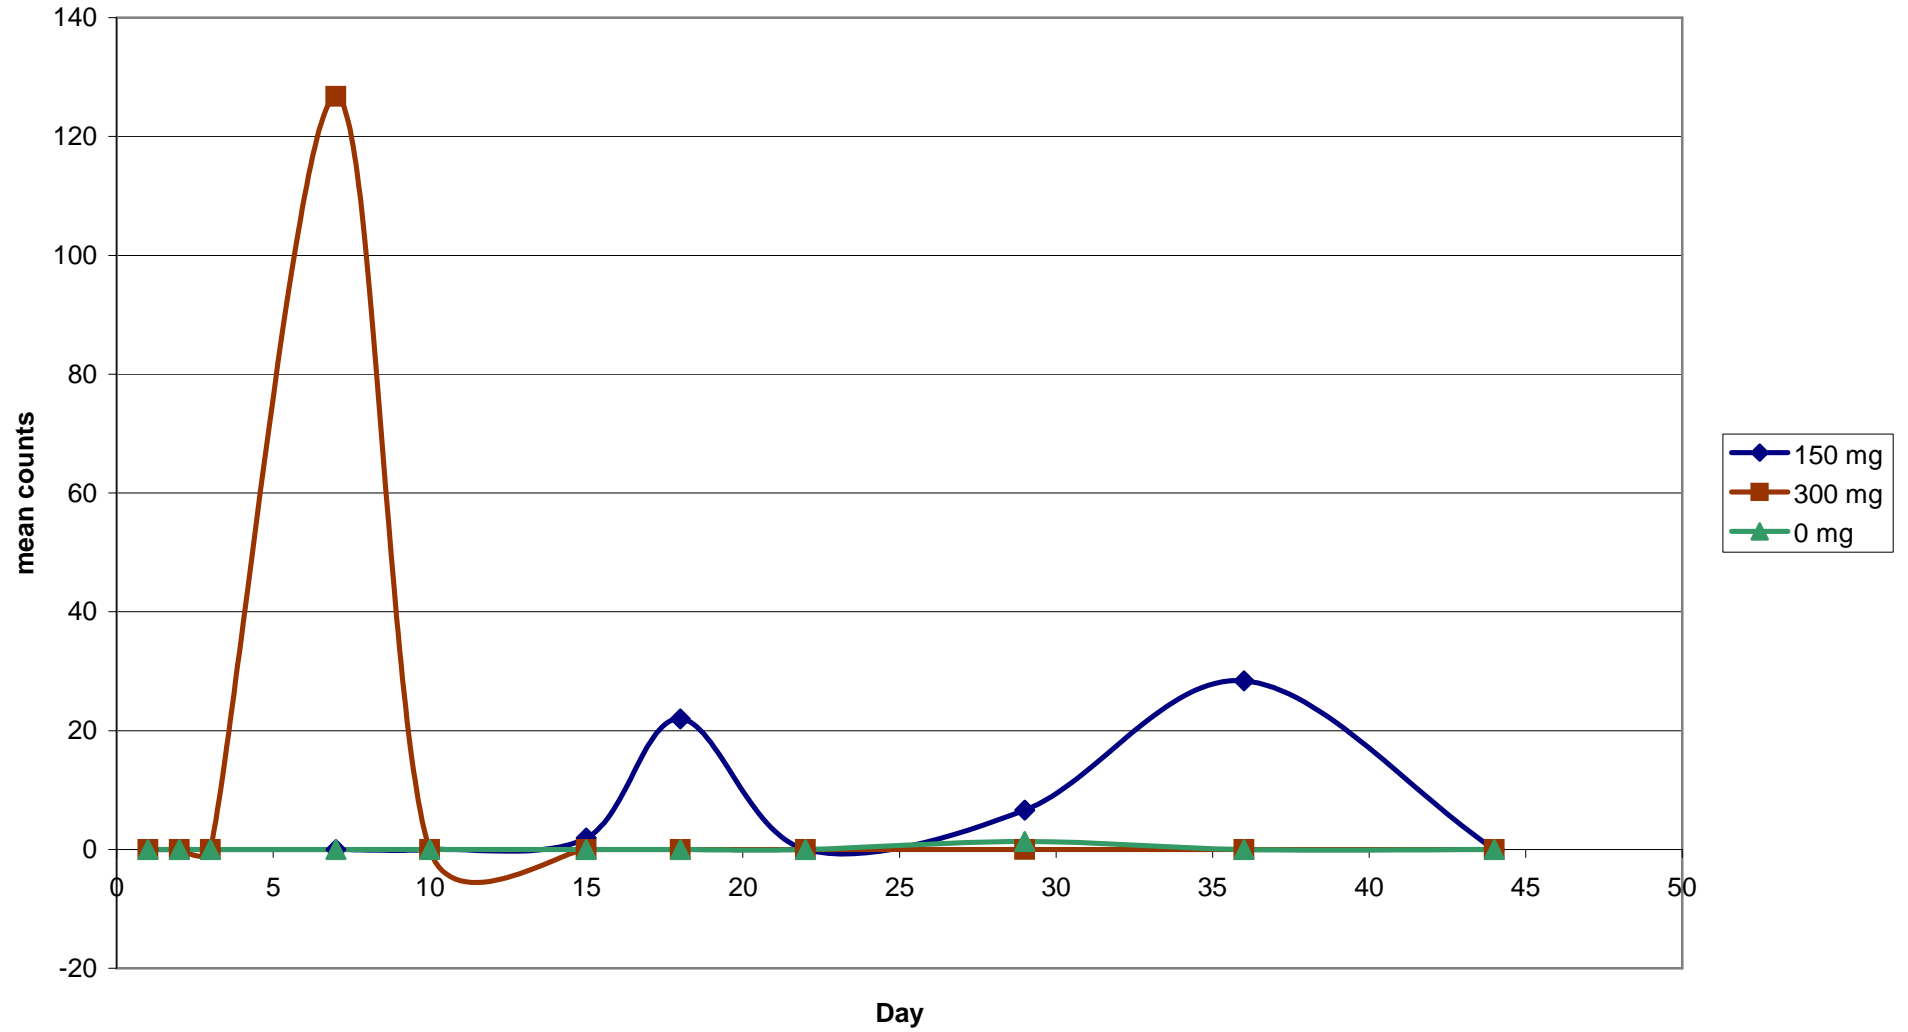

ID 6115

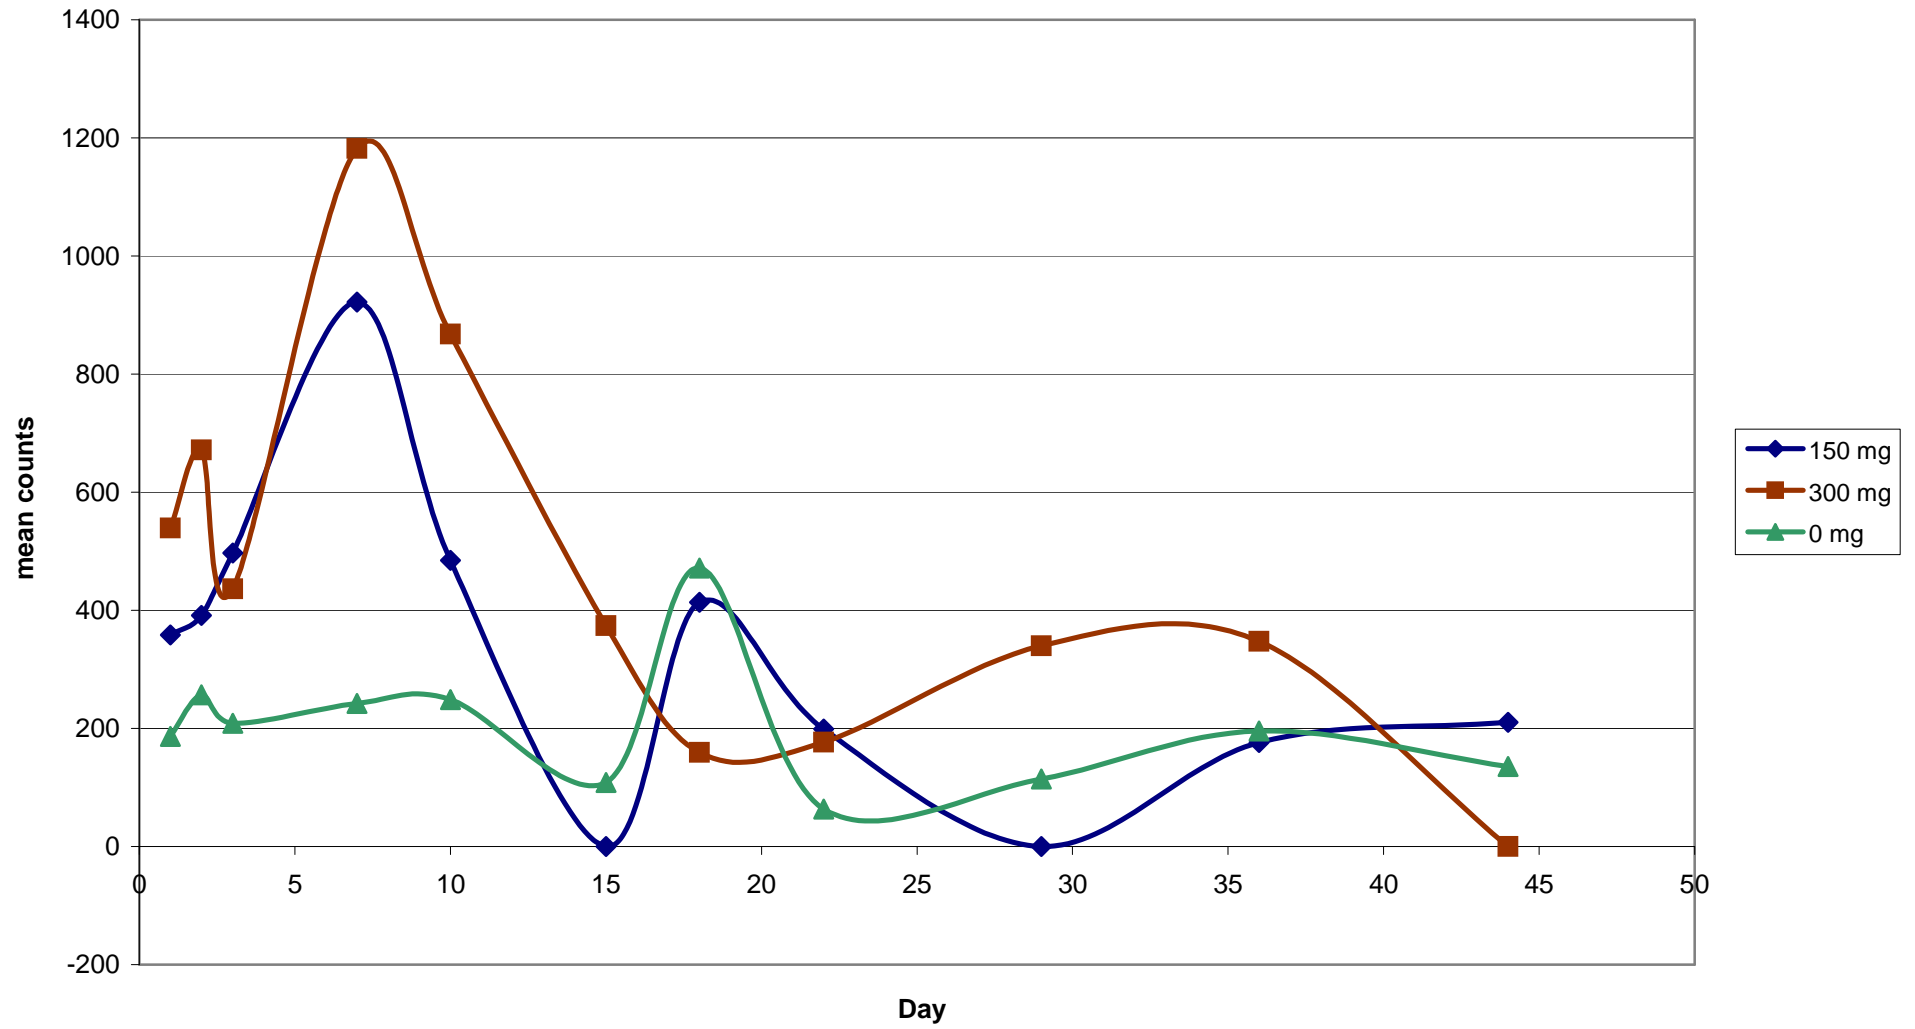

ID 6252

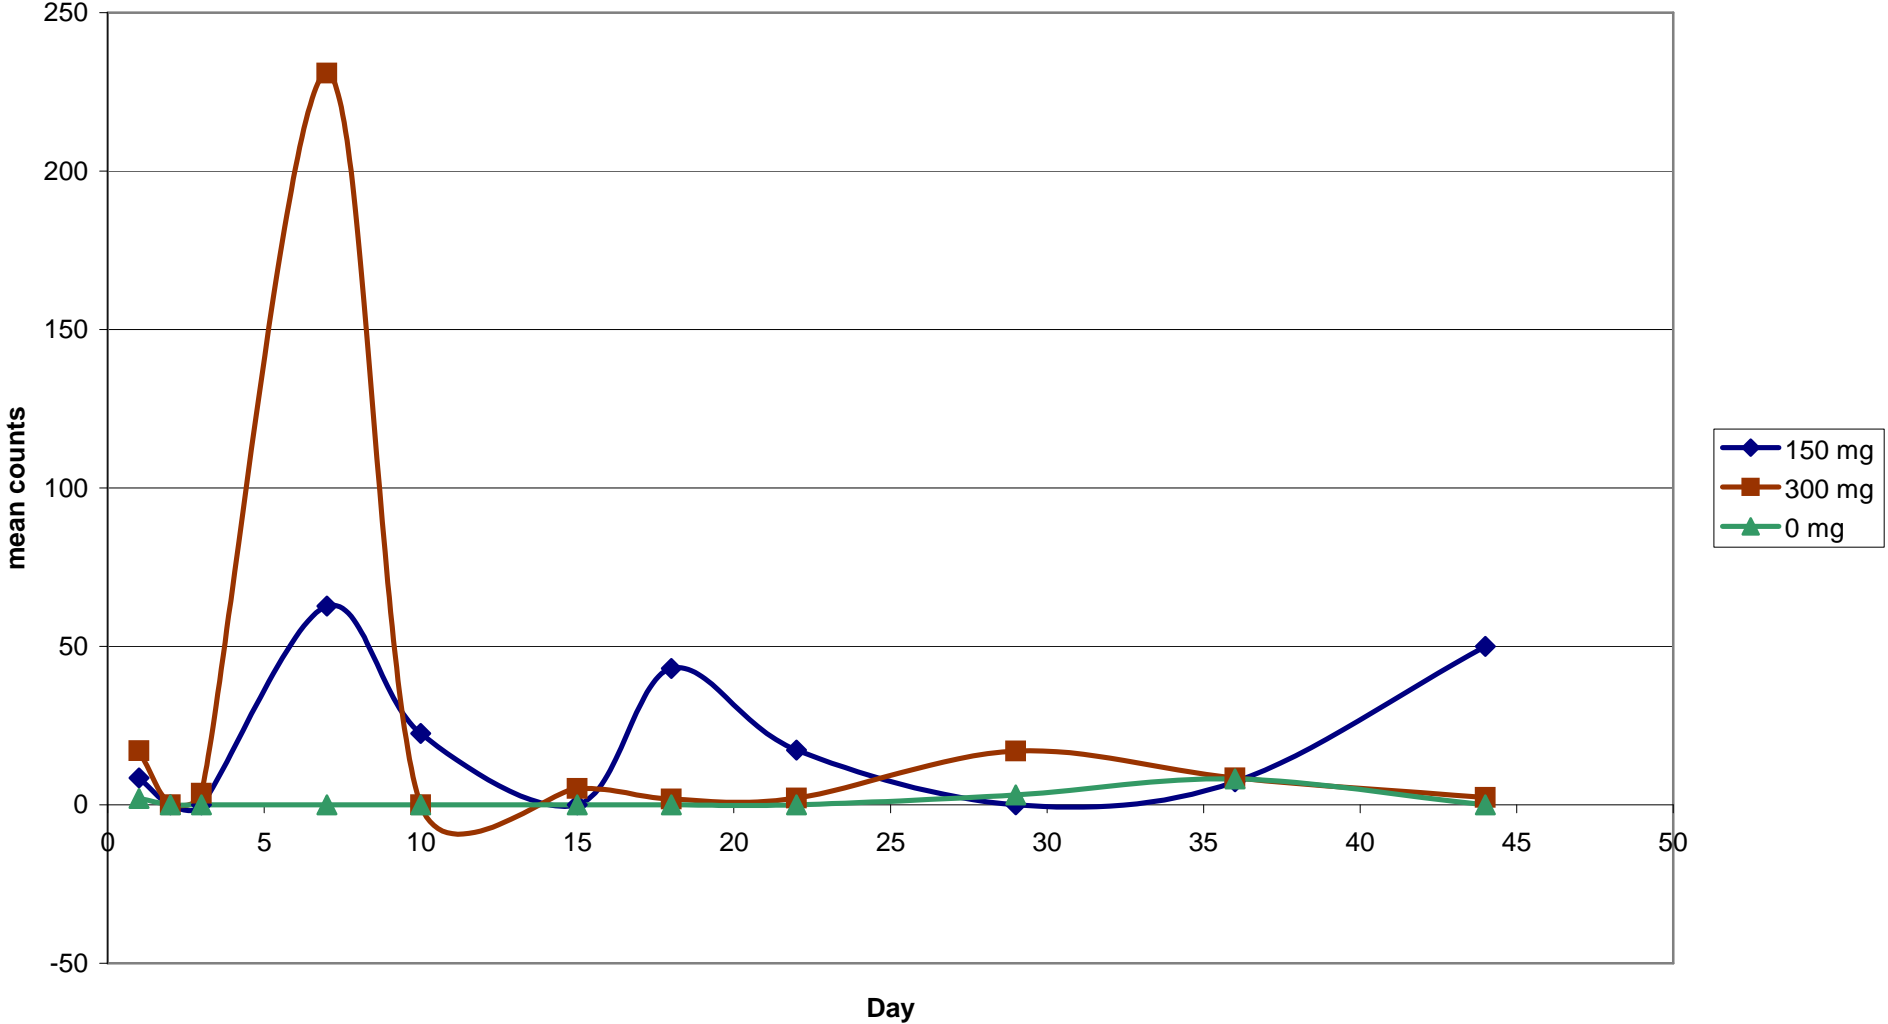

ID 6485

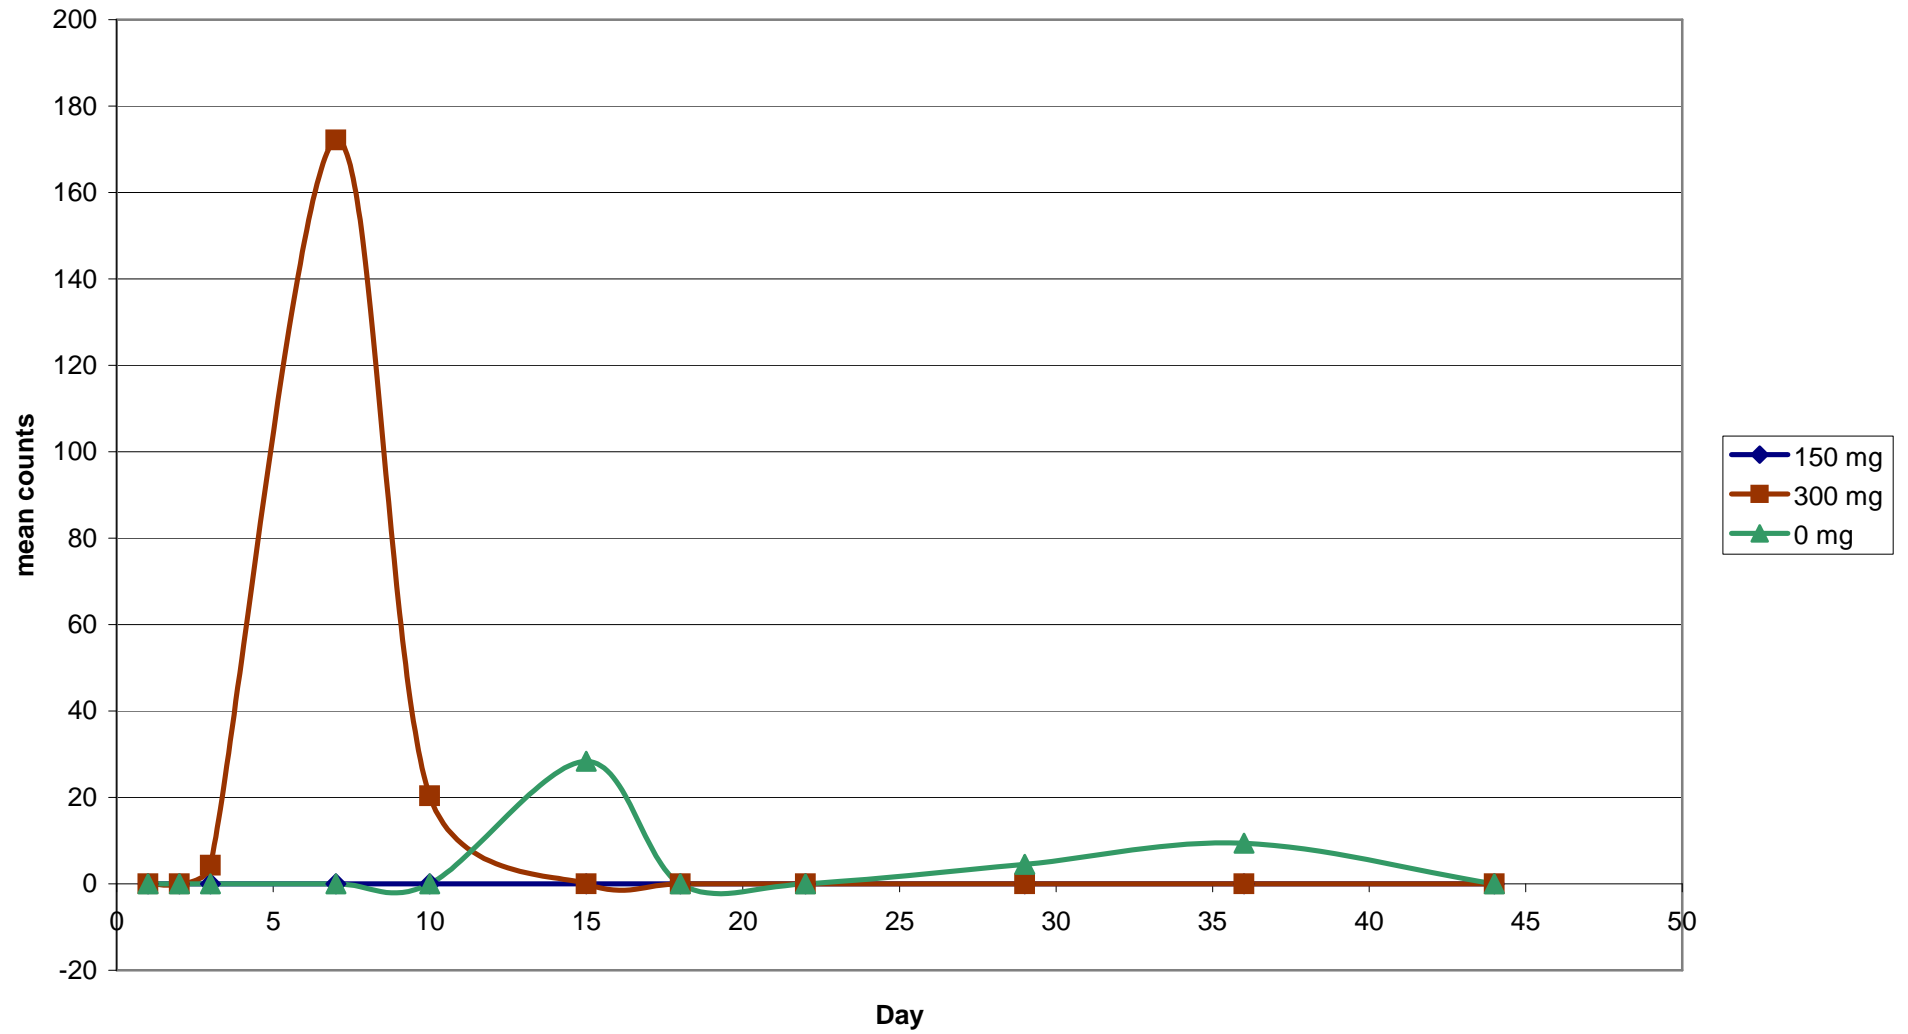

ID 6850

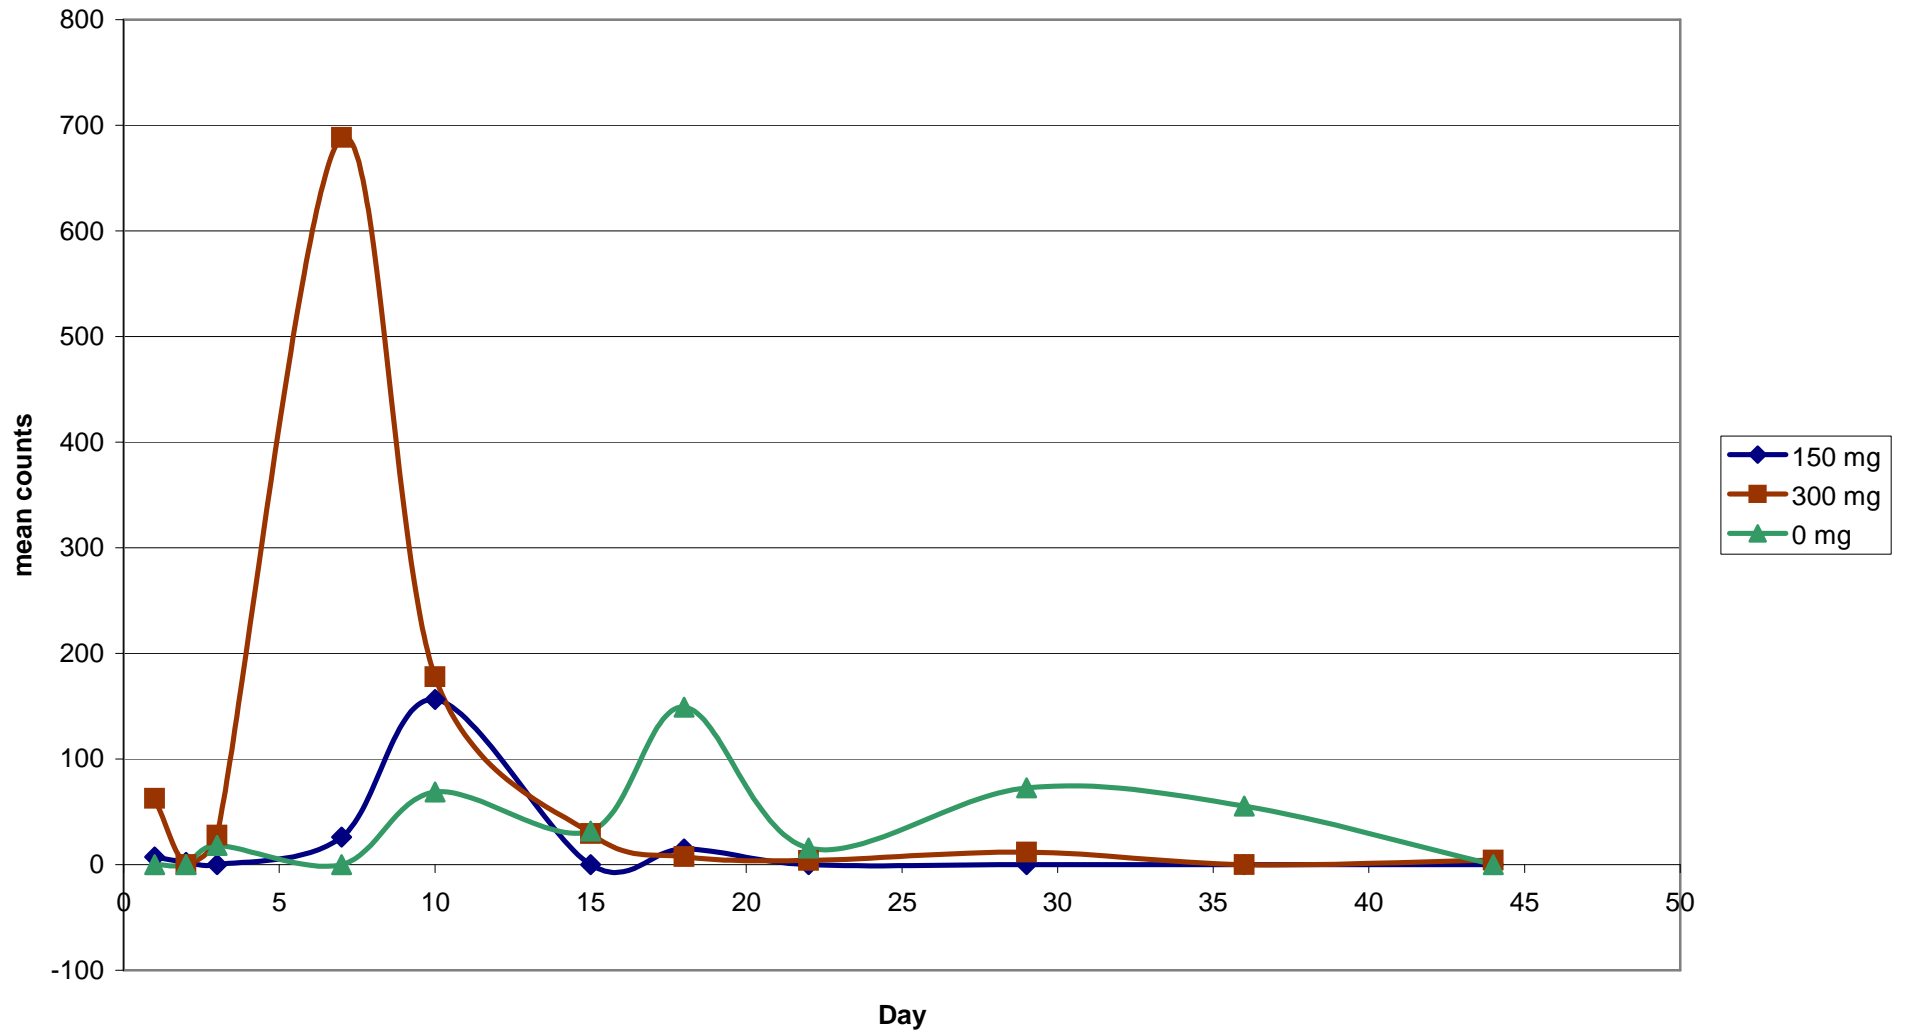



ID 9042

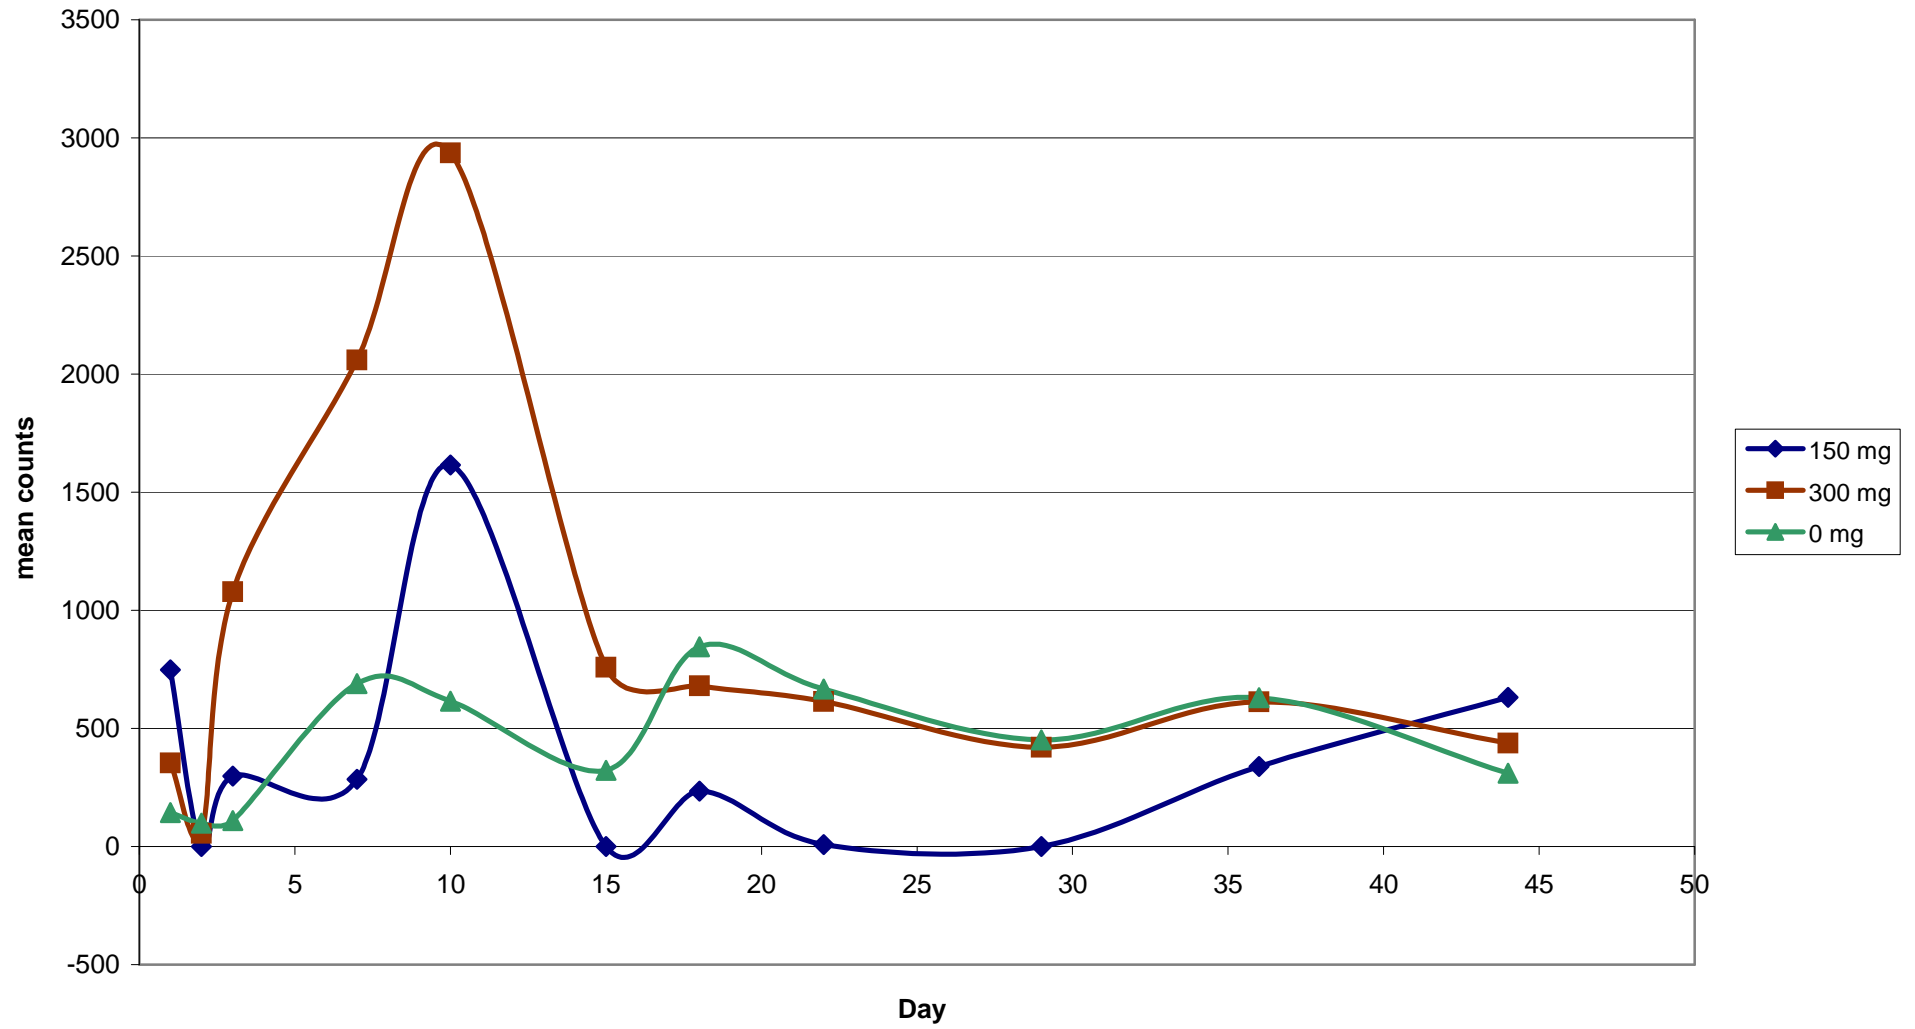

ID 9447

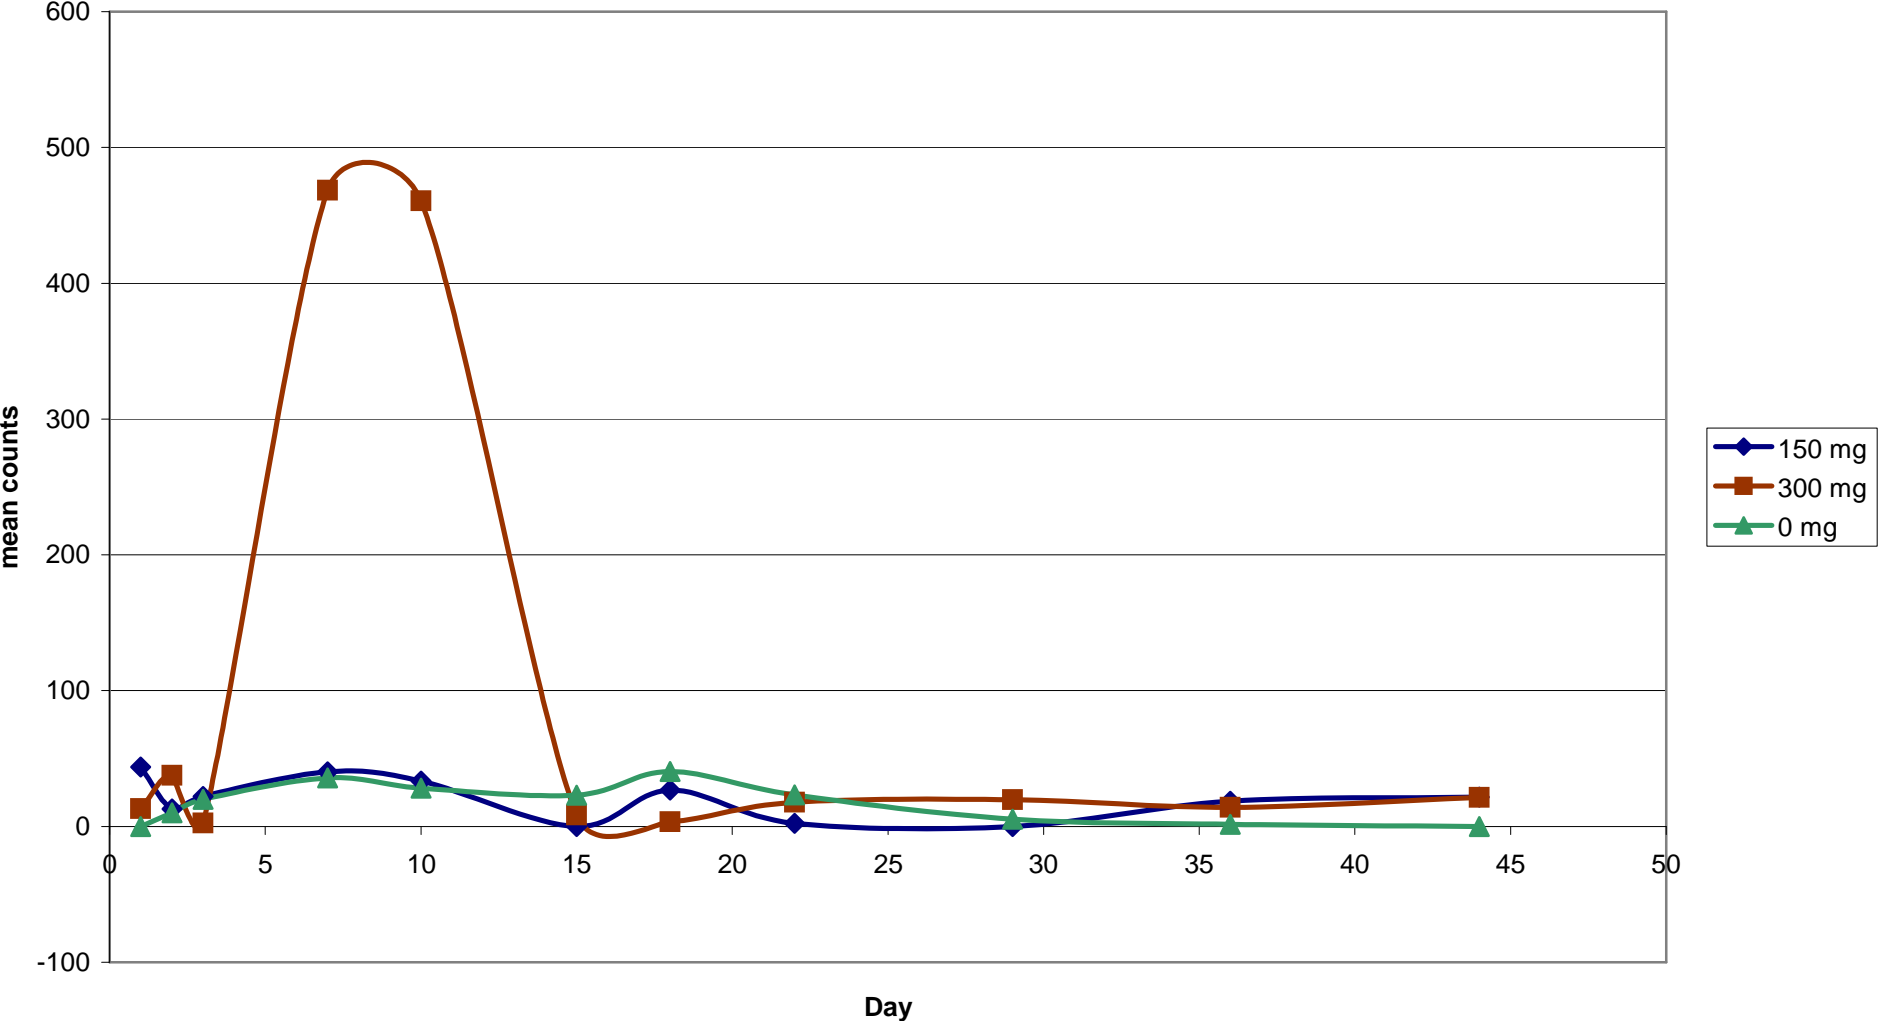

ID 10077

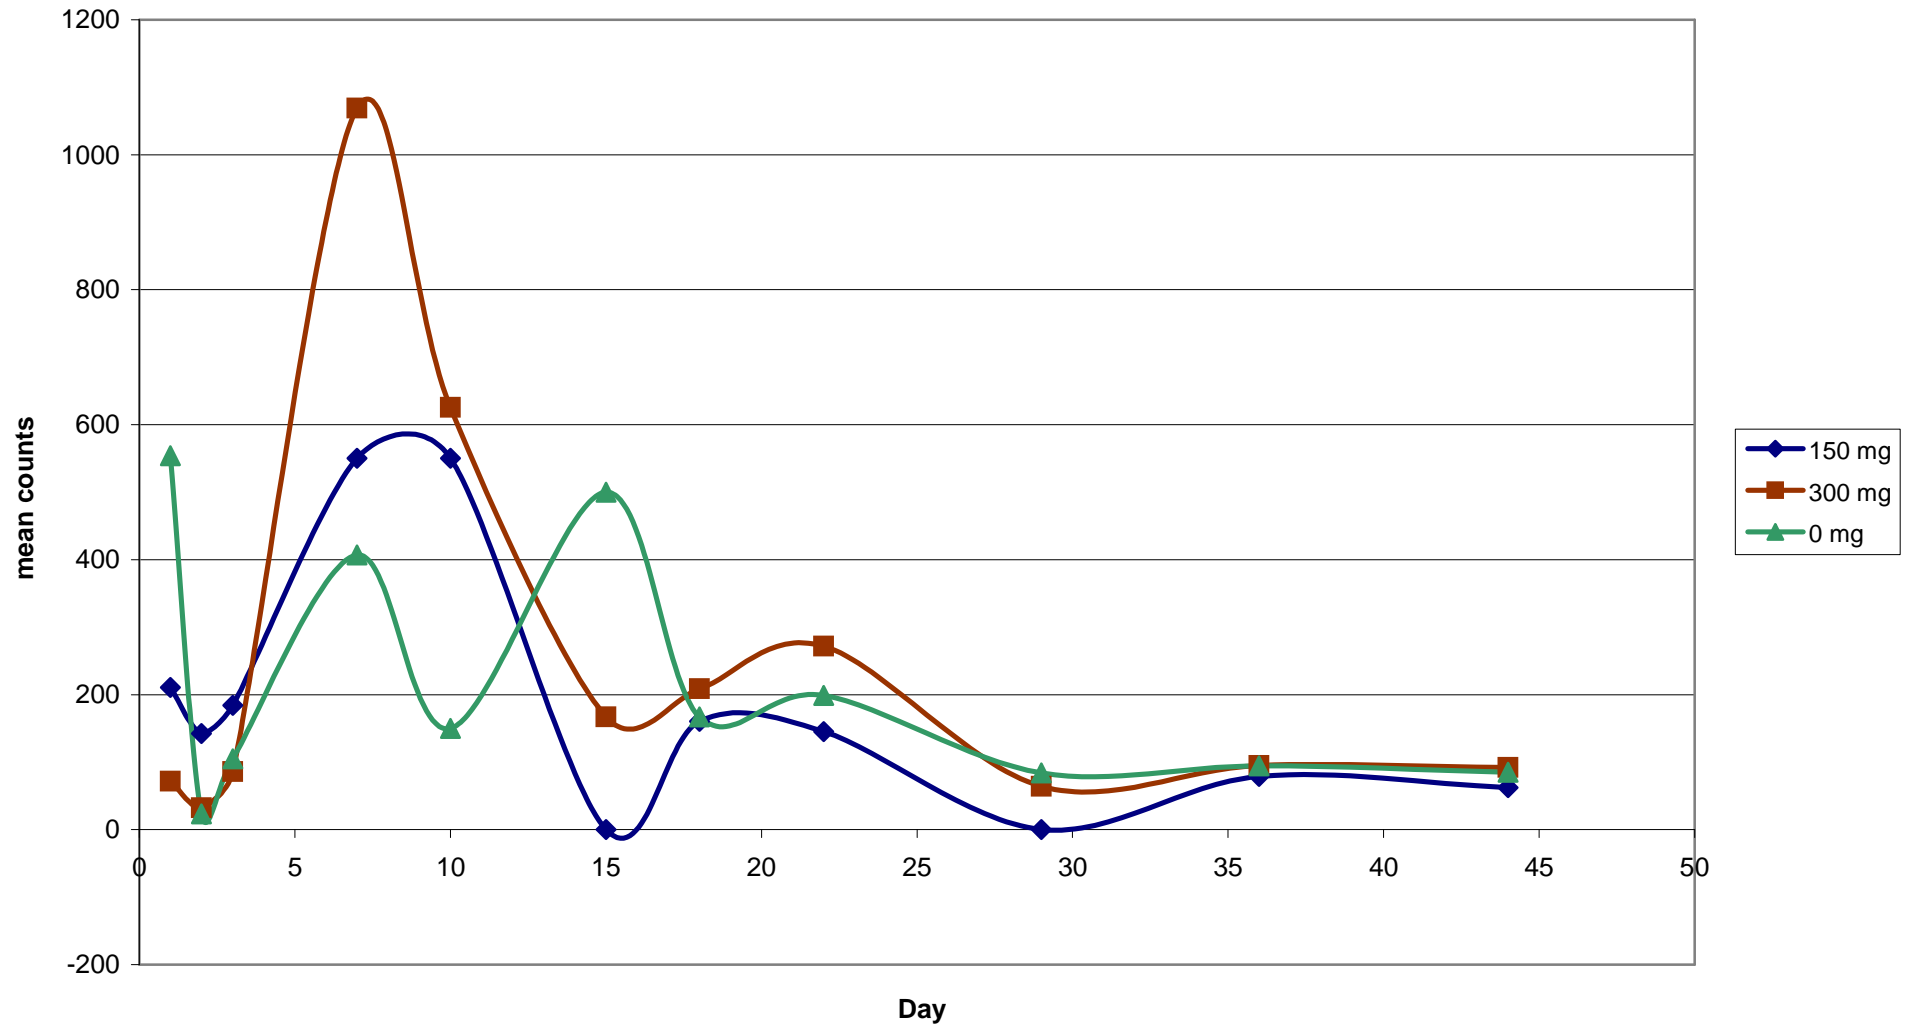

ID 10106

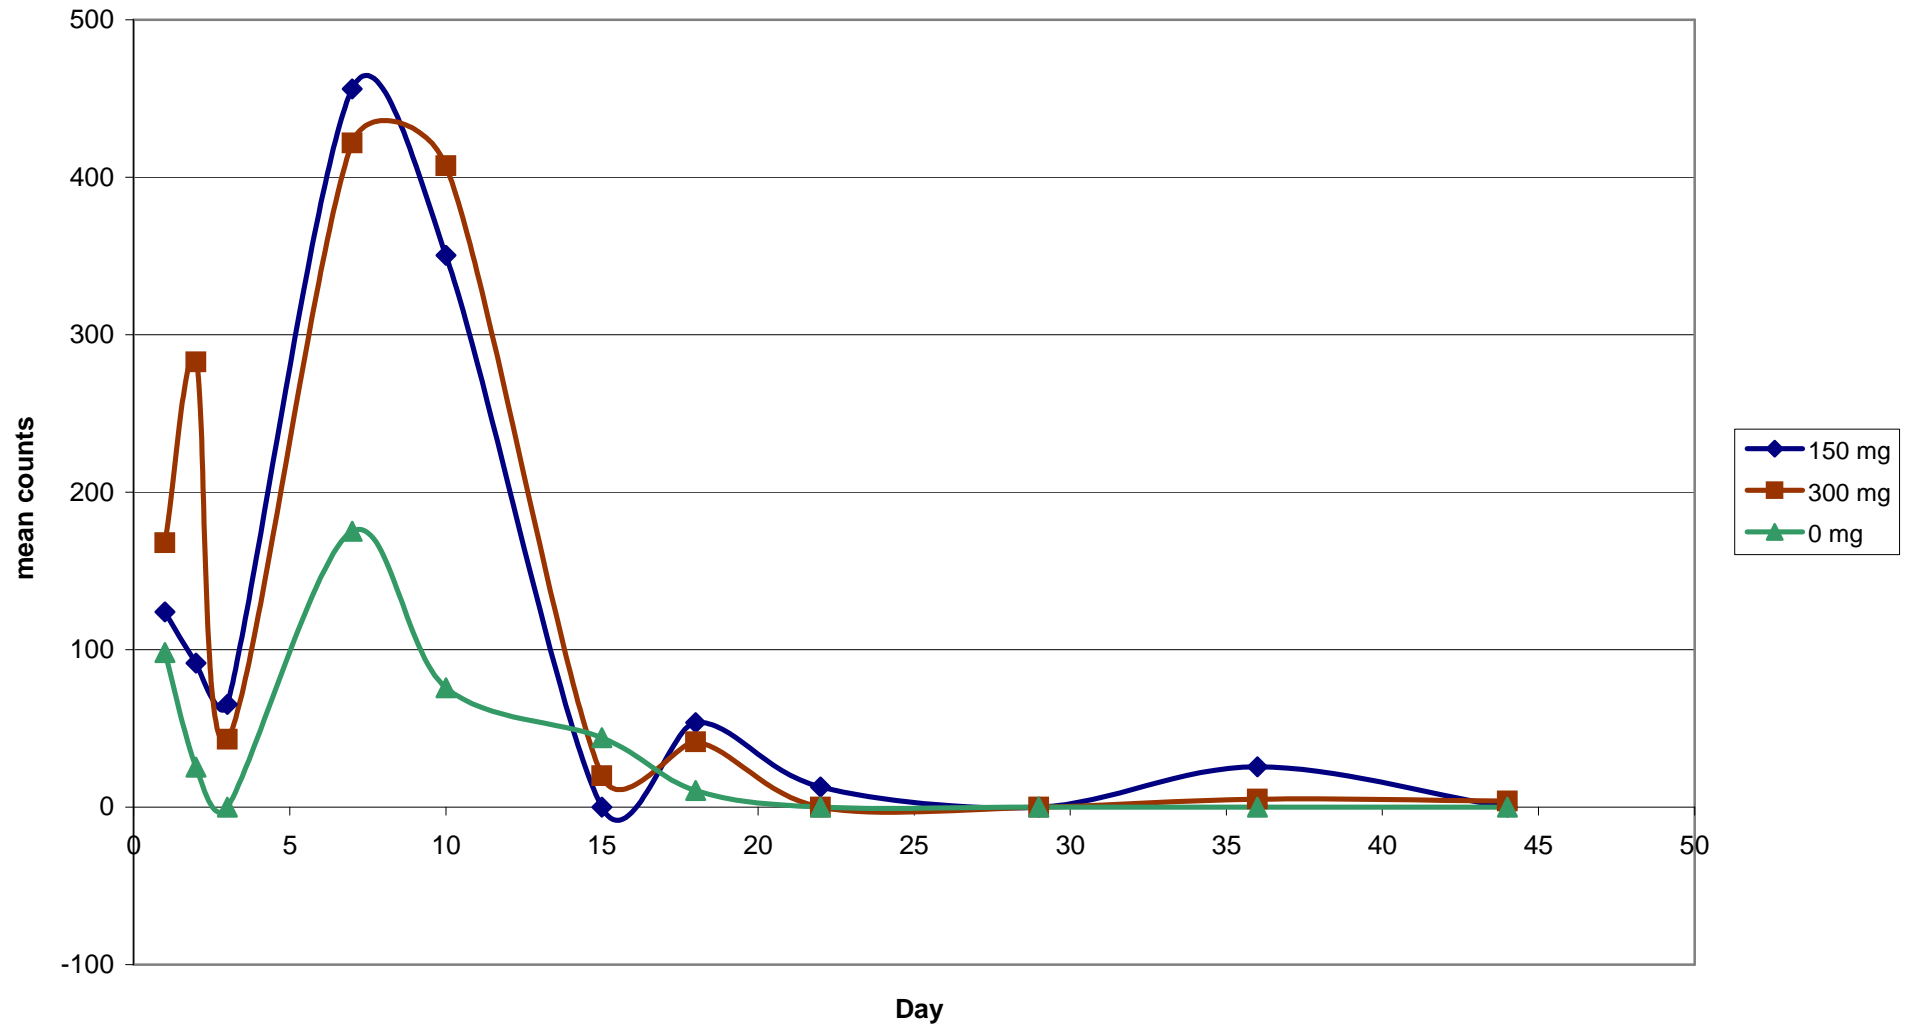

ID 10349

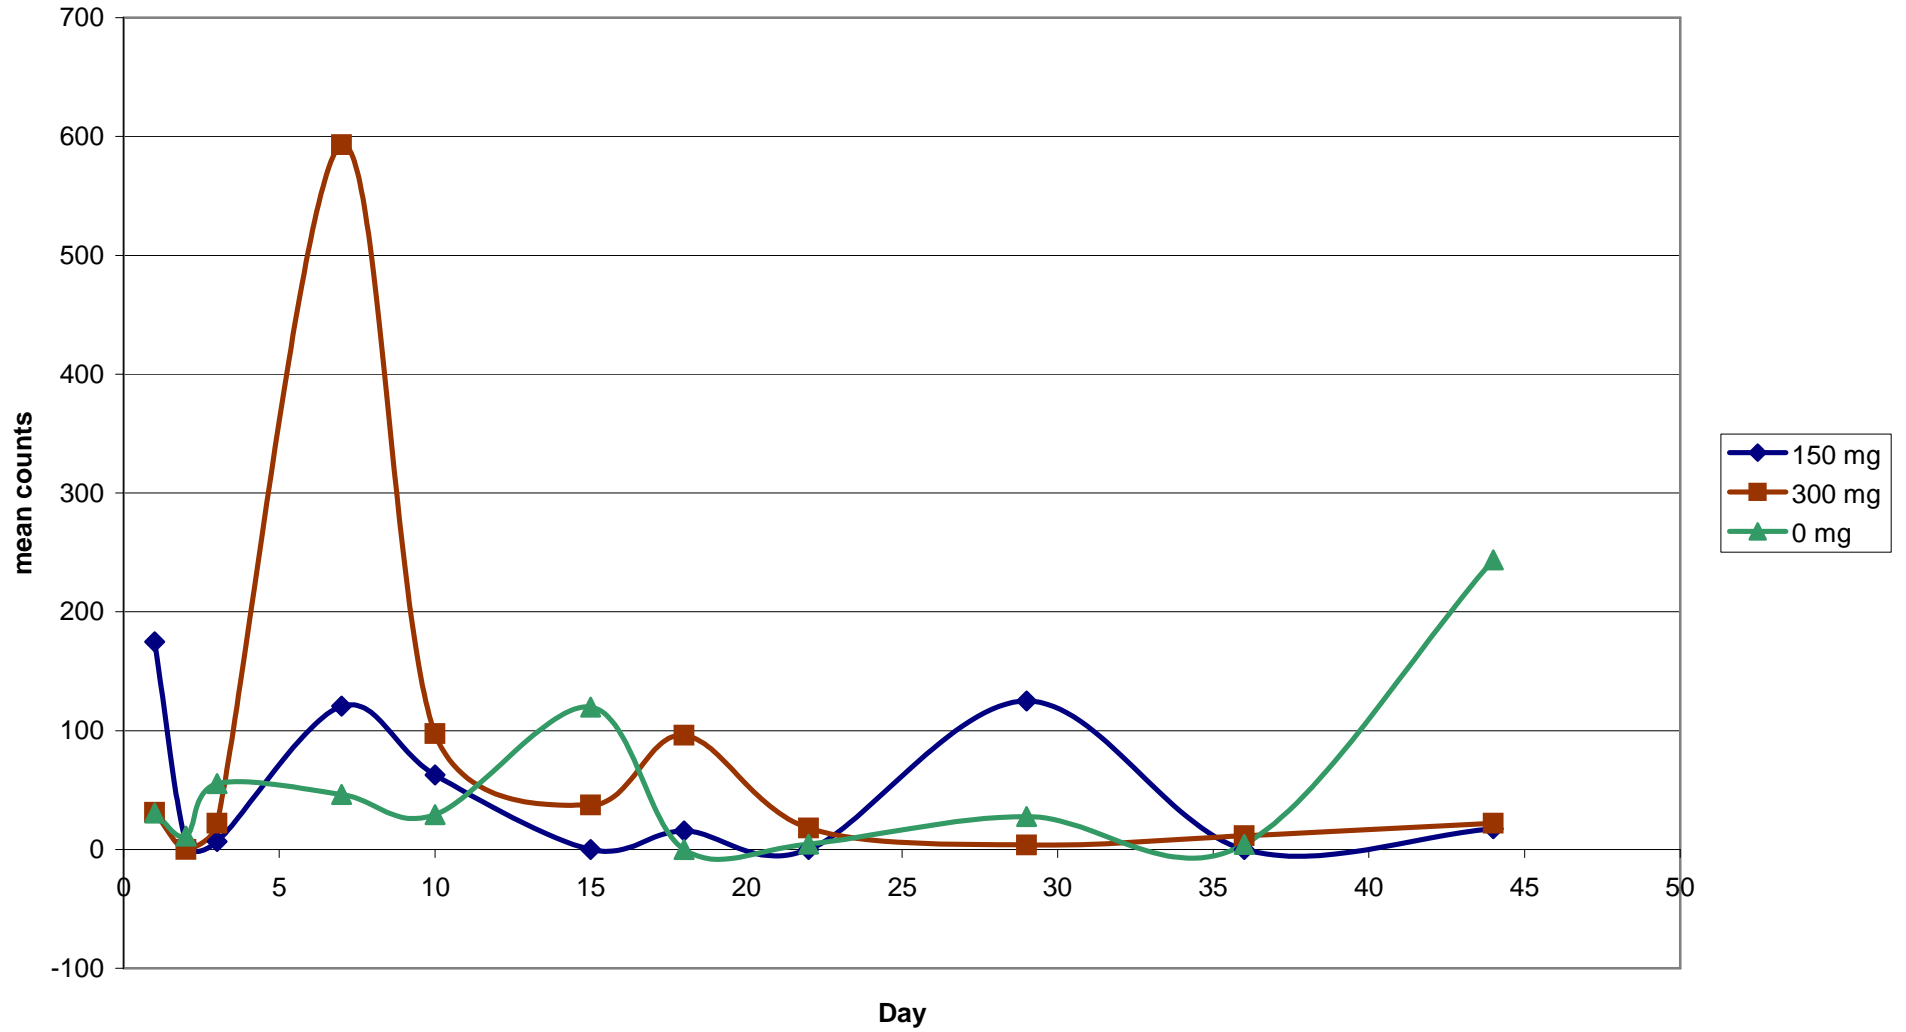

ID 10778

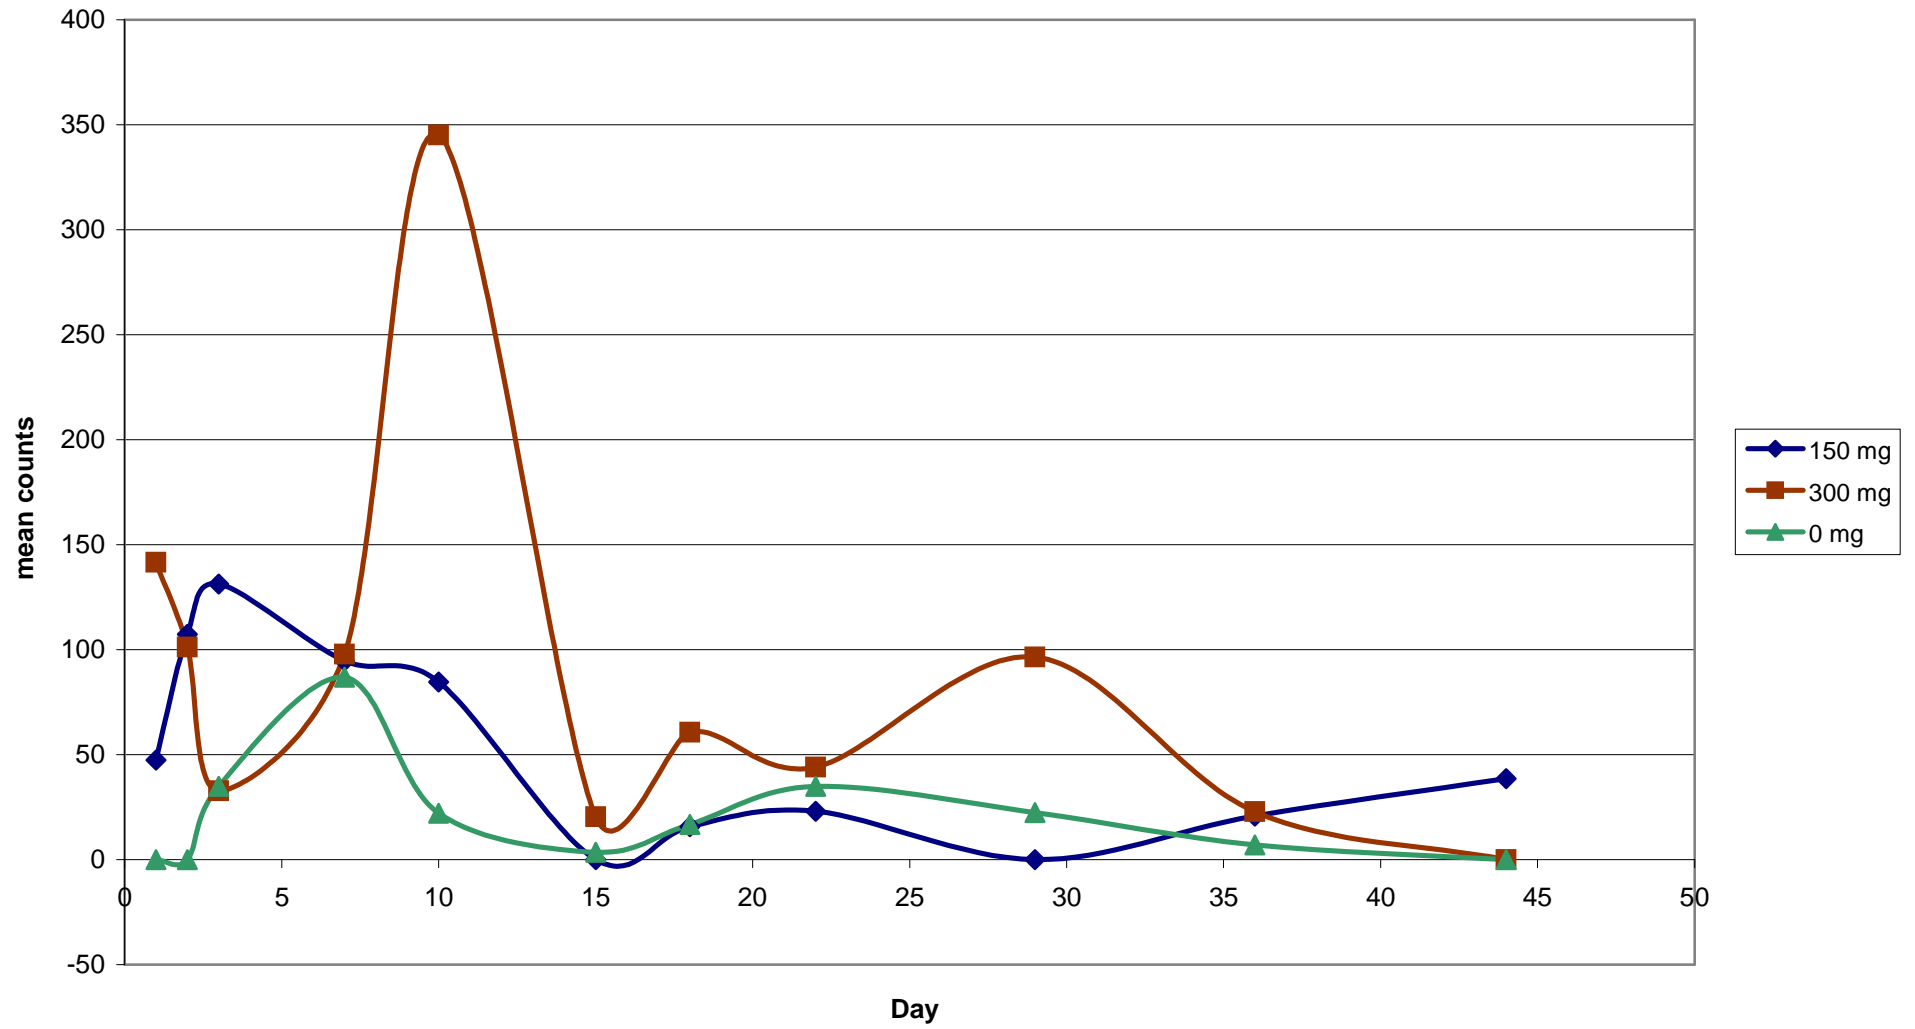

ID 10895

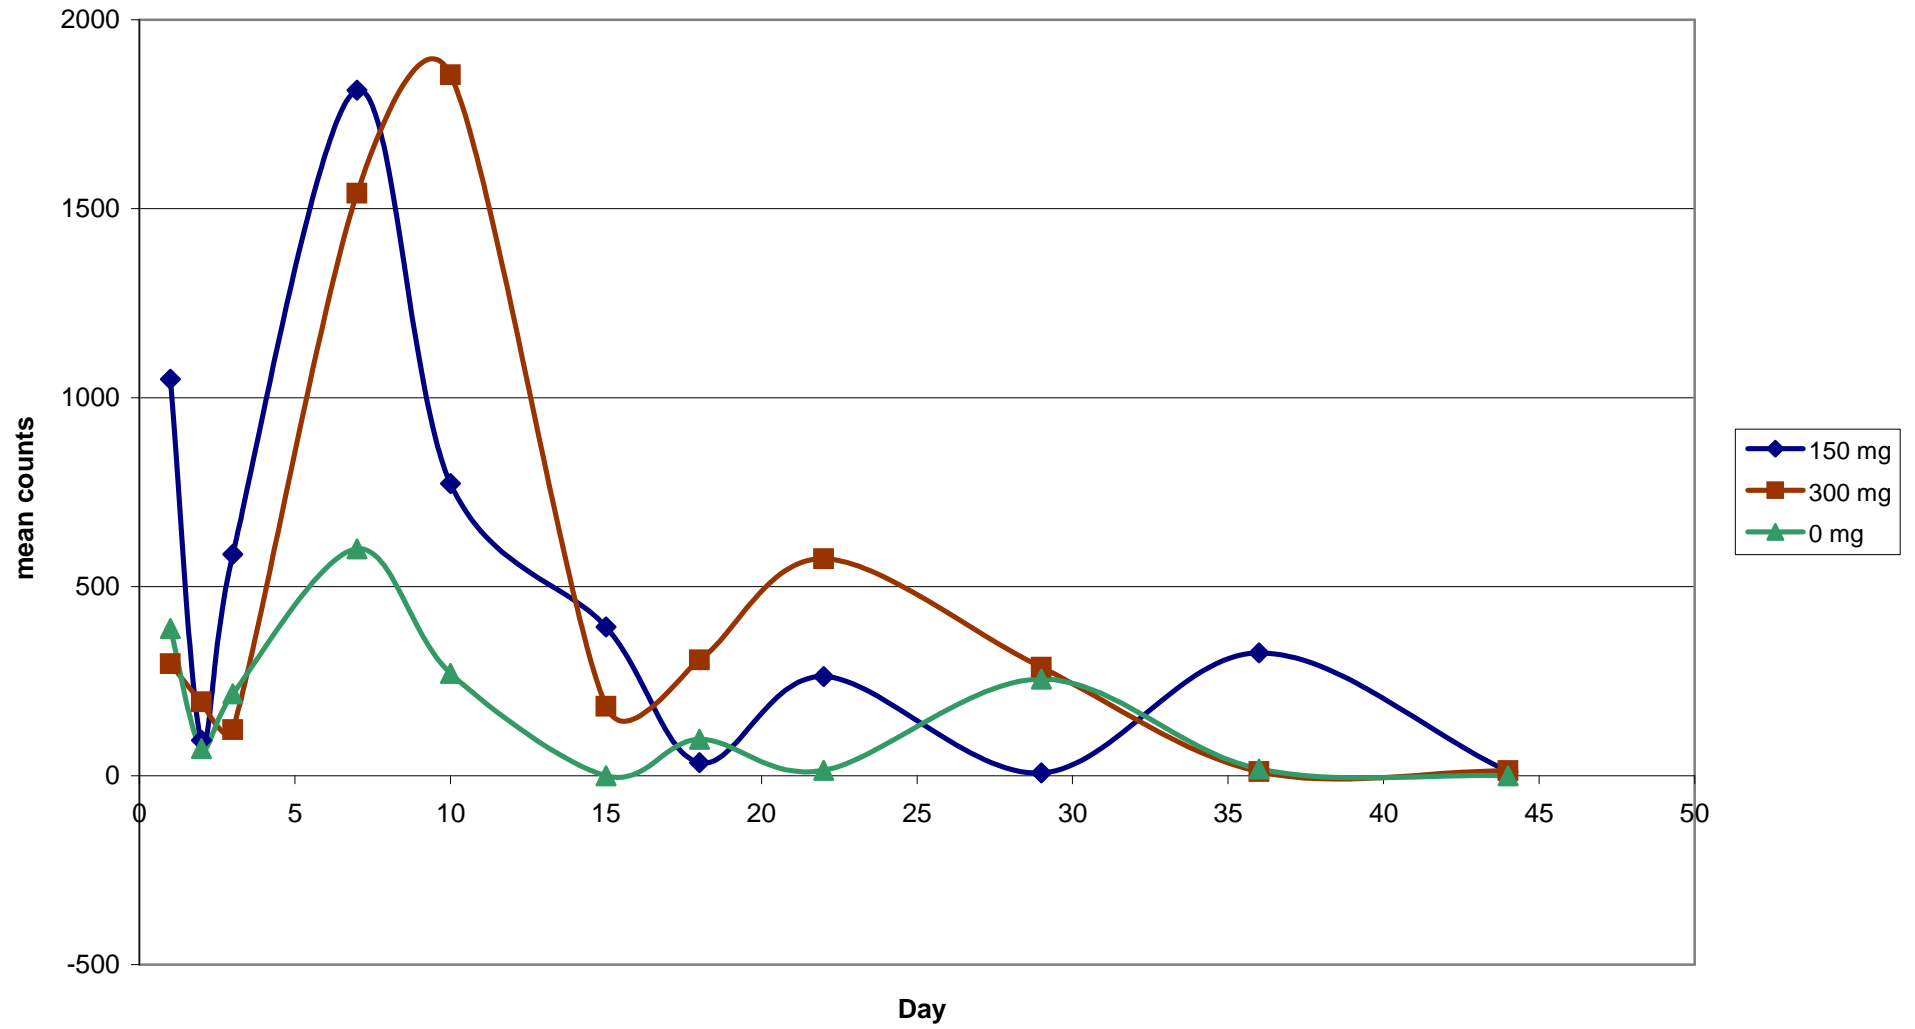

ID 11792

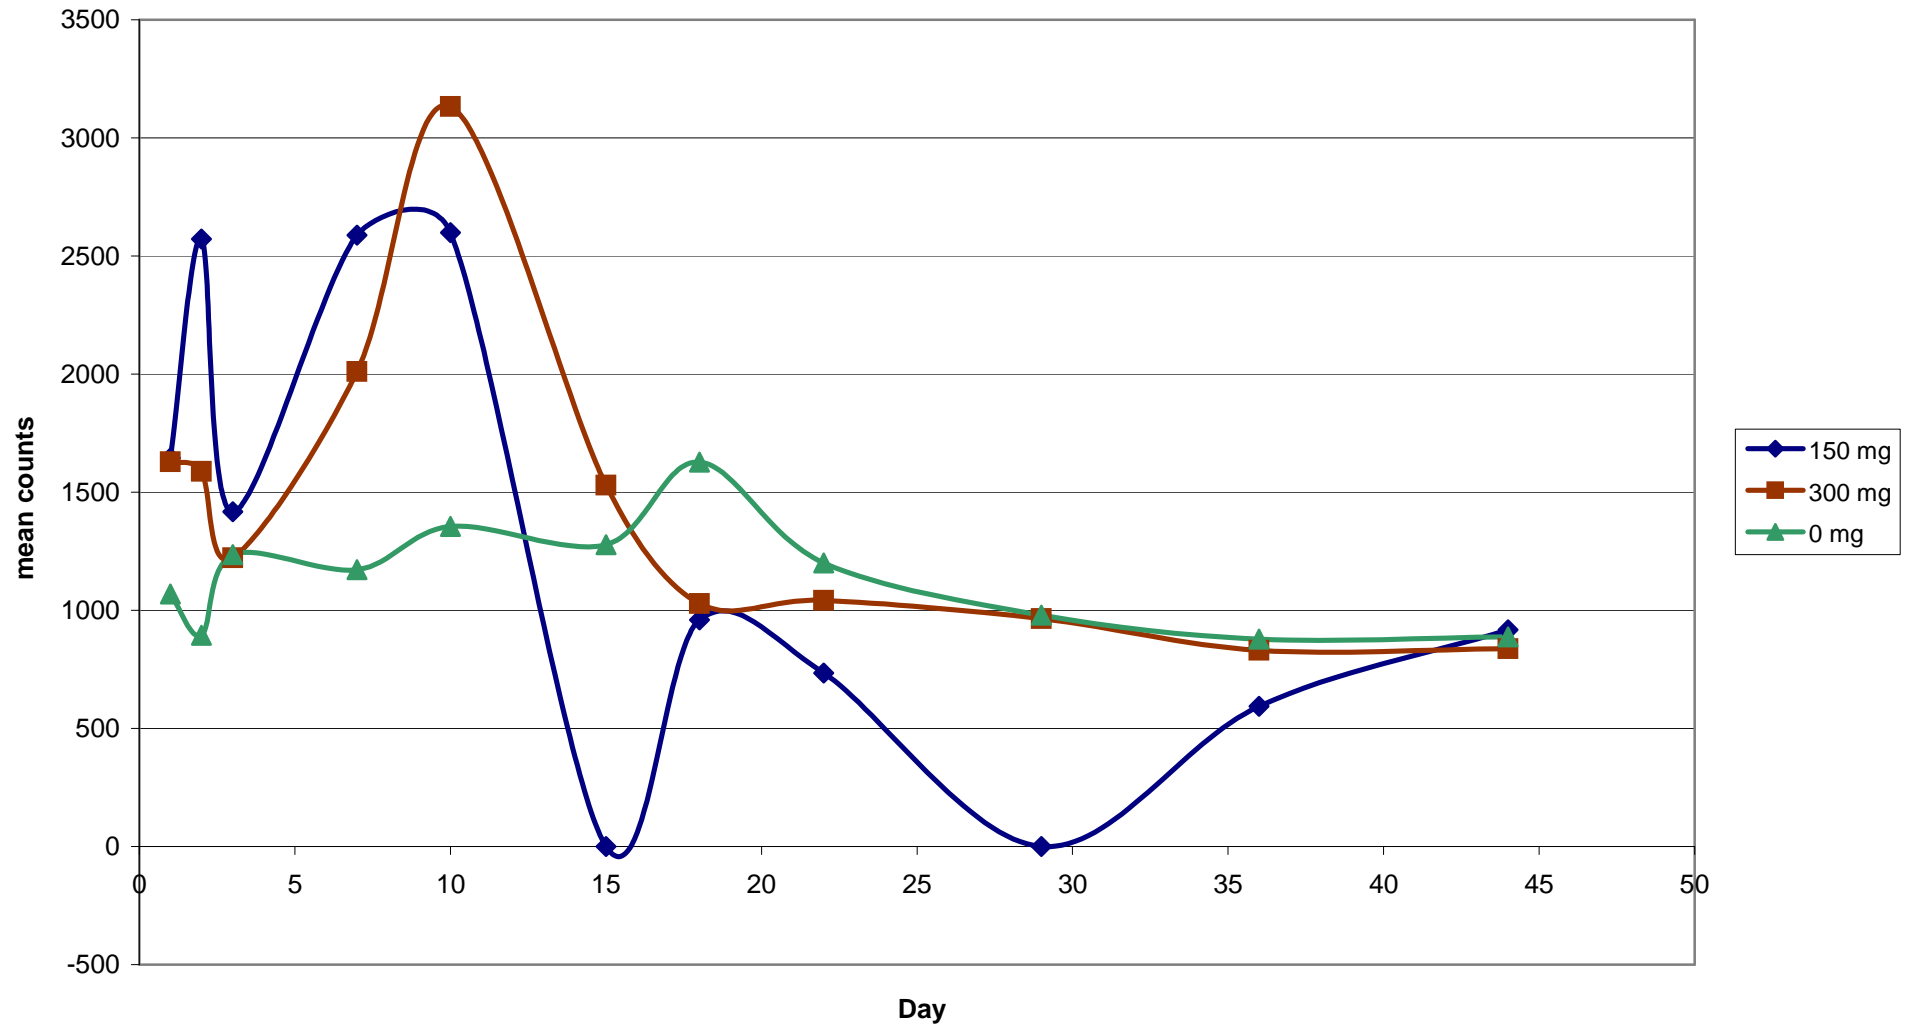



ID 12622

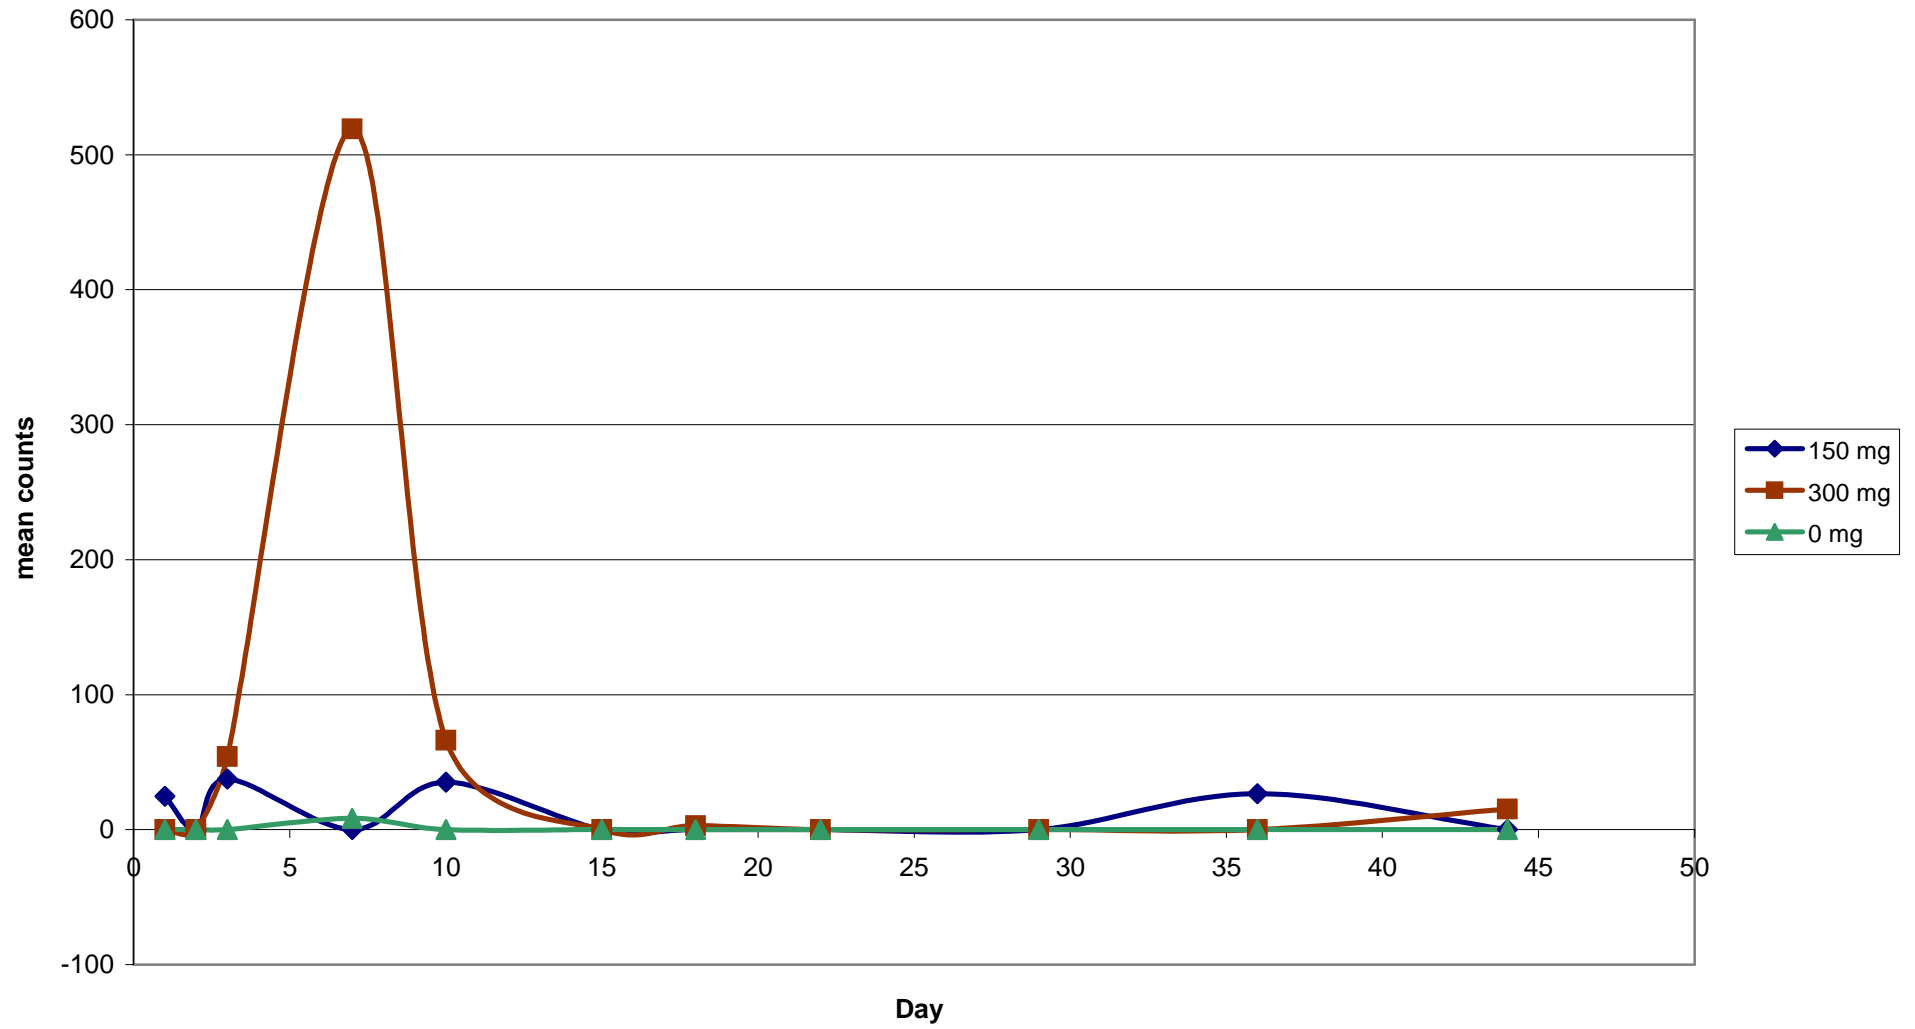

ID 13132

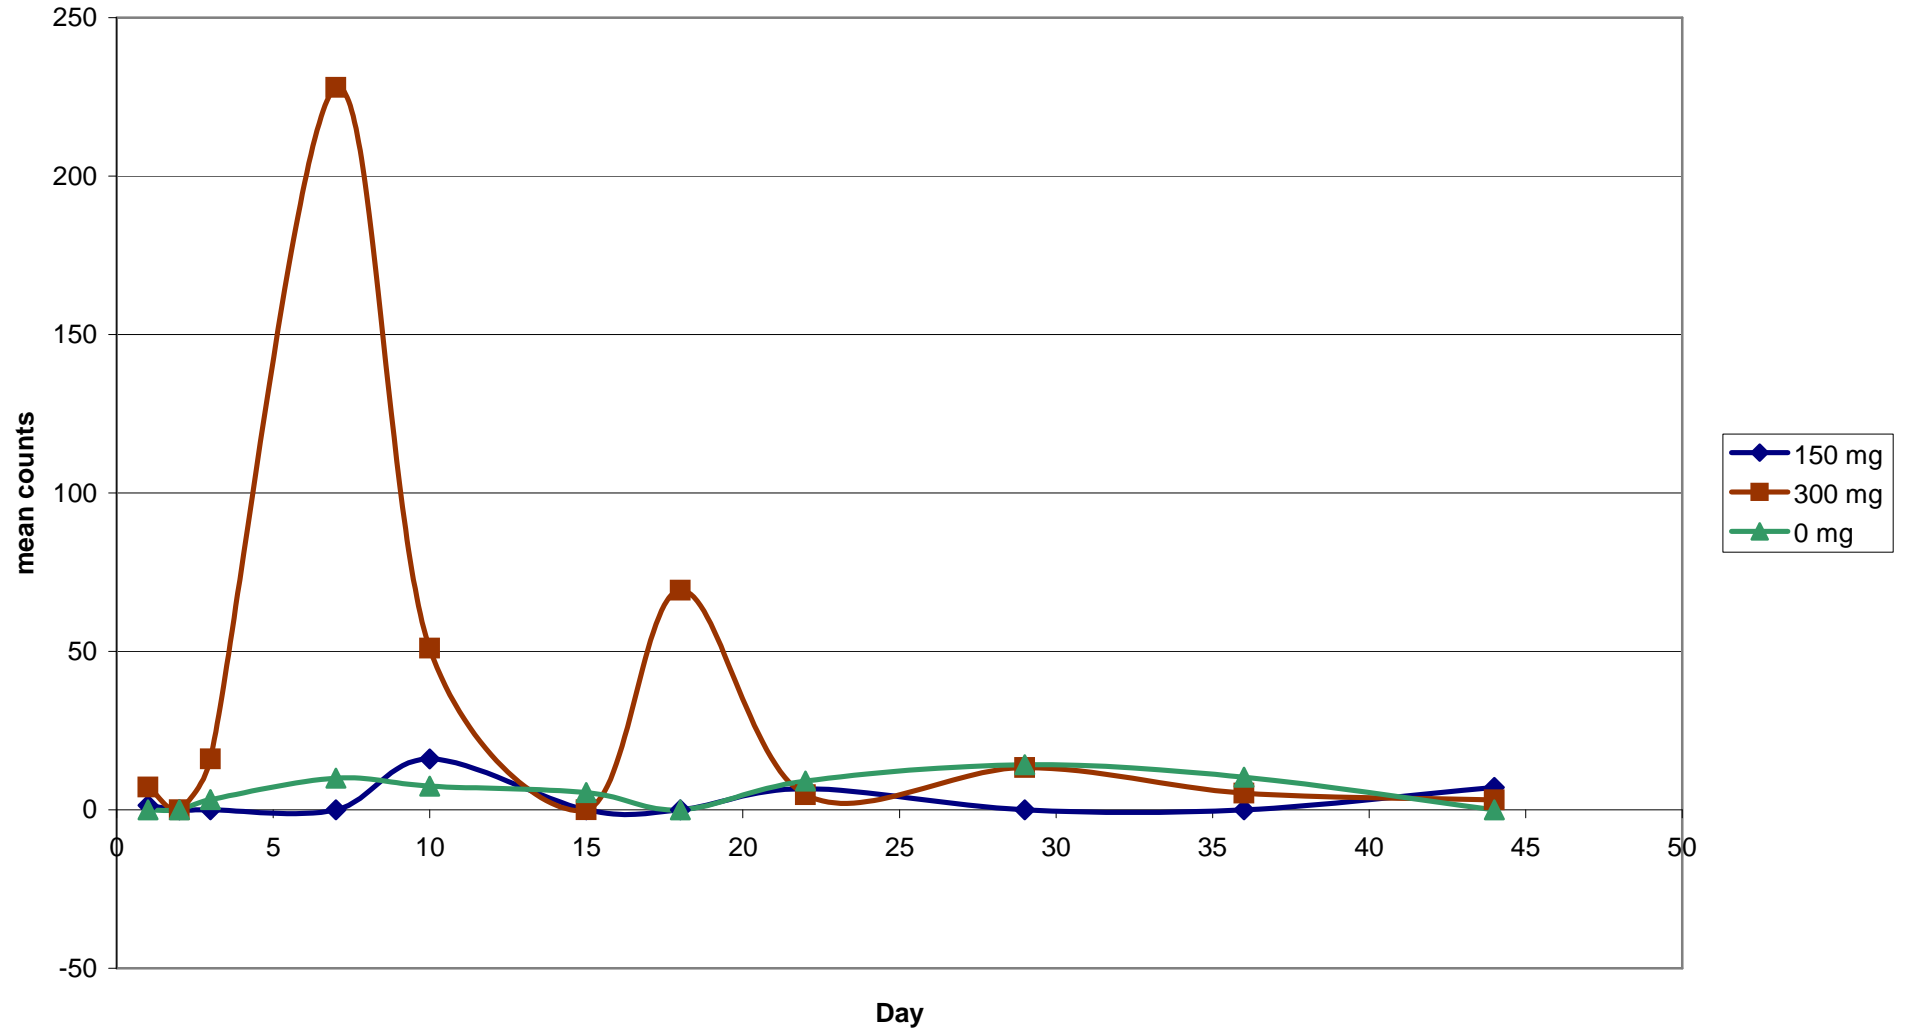

ID 13290

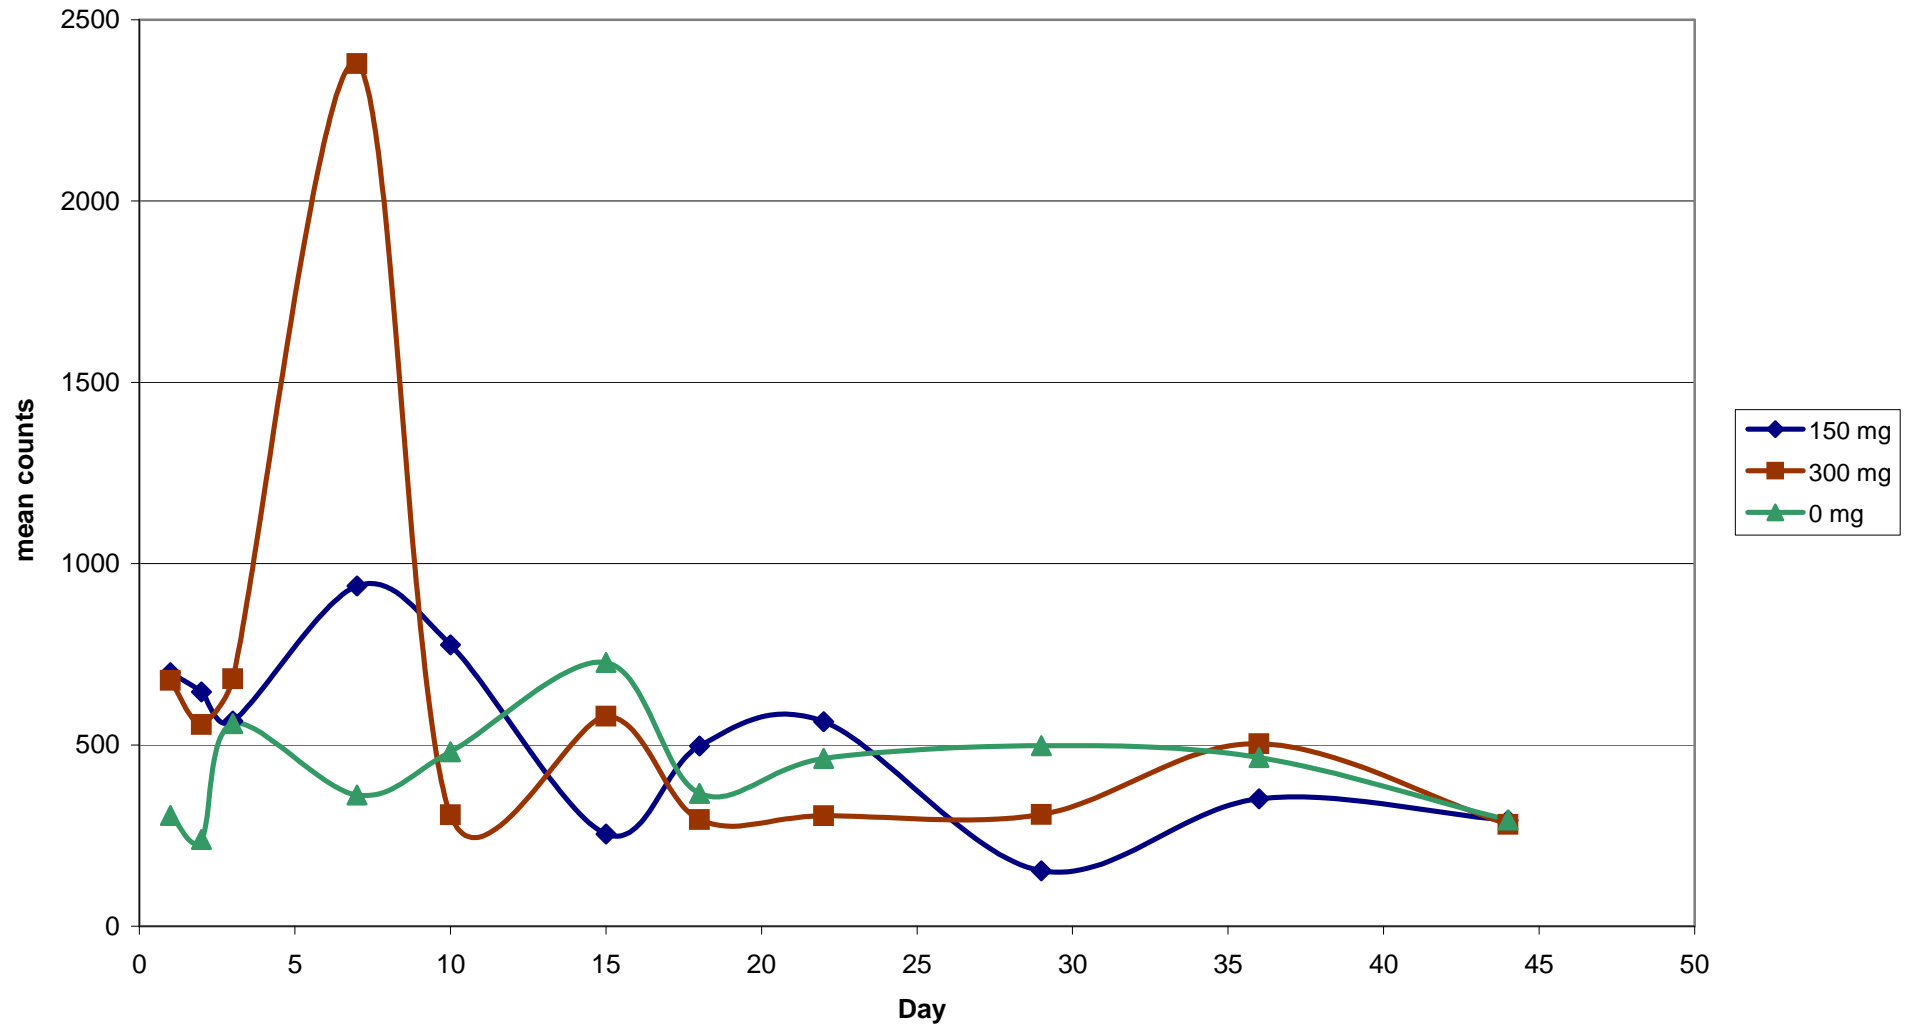

ID 13442

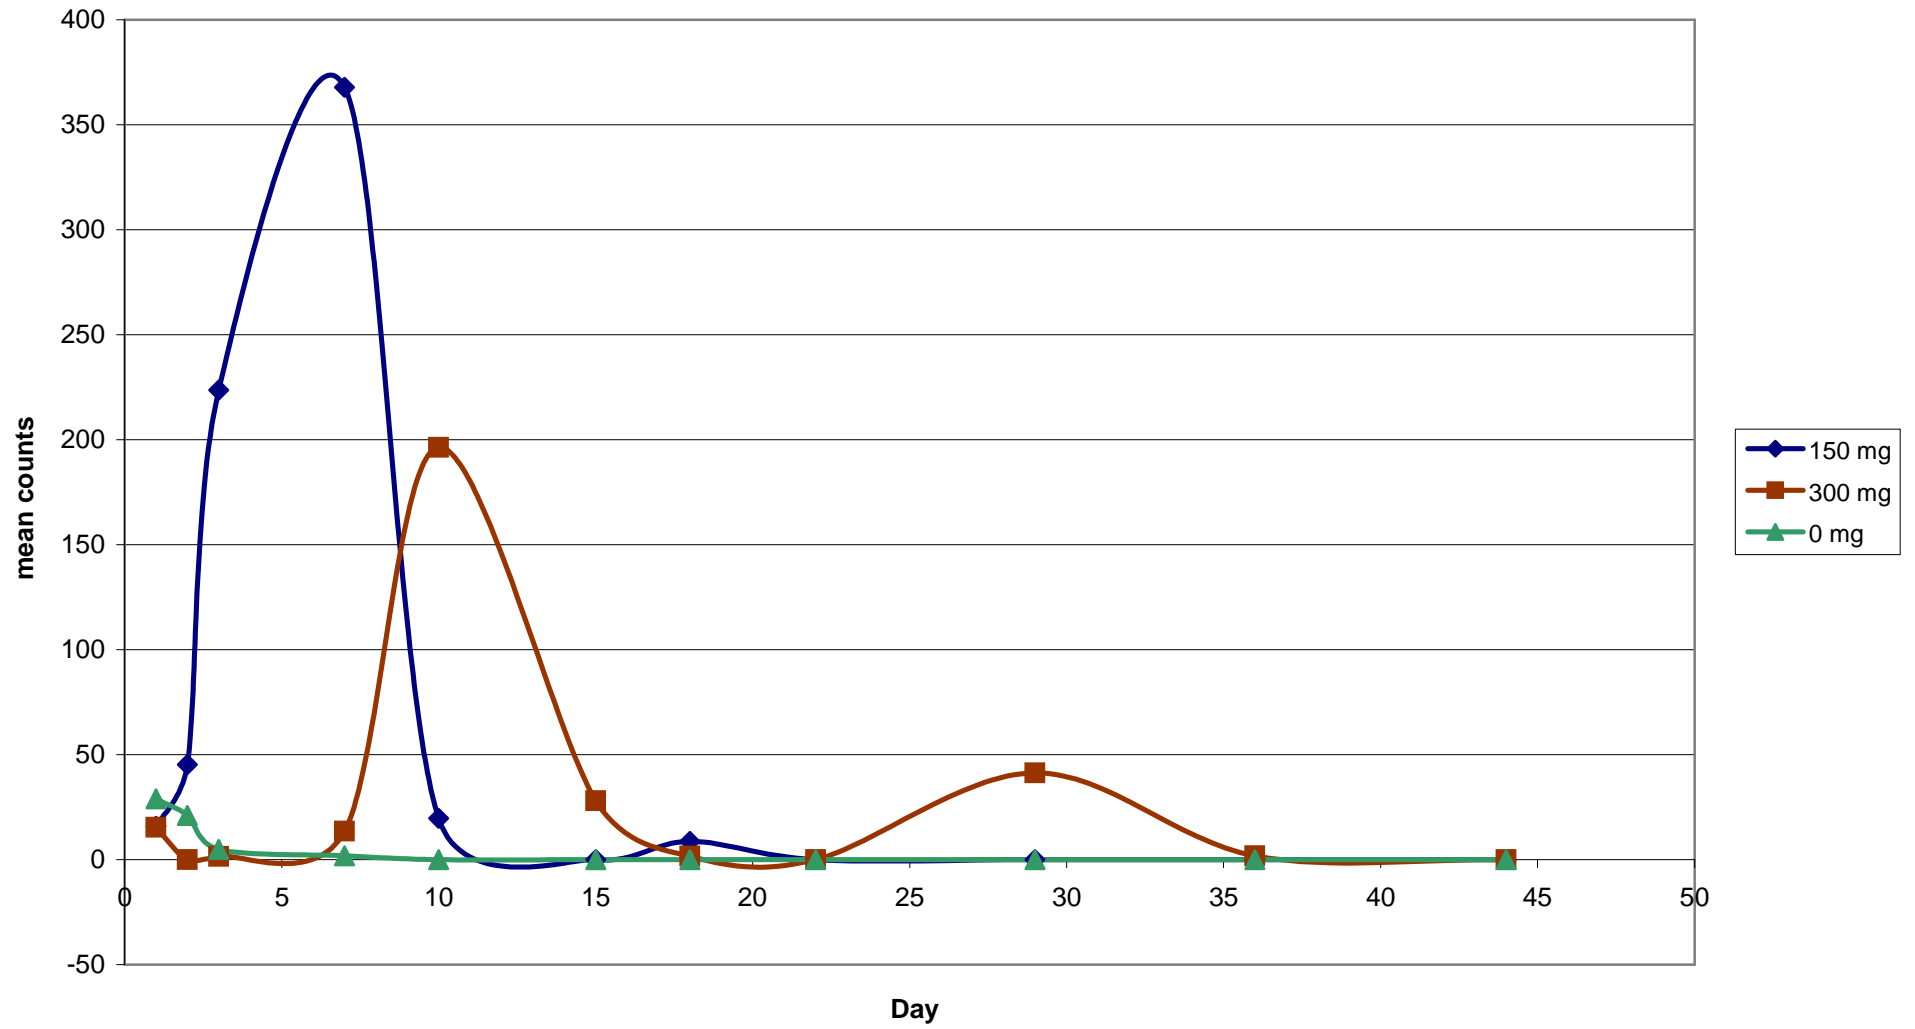

ID 13601

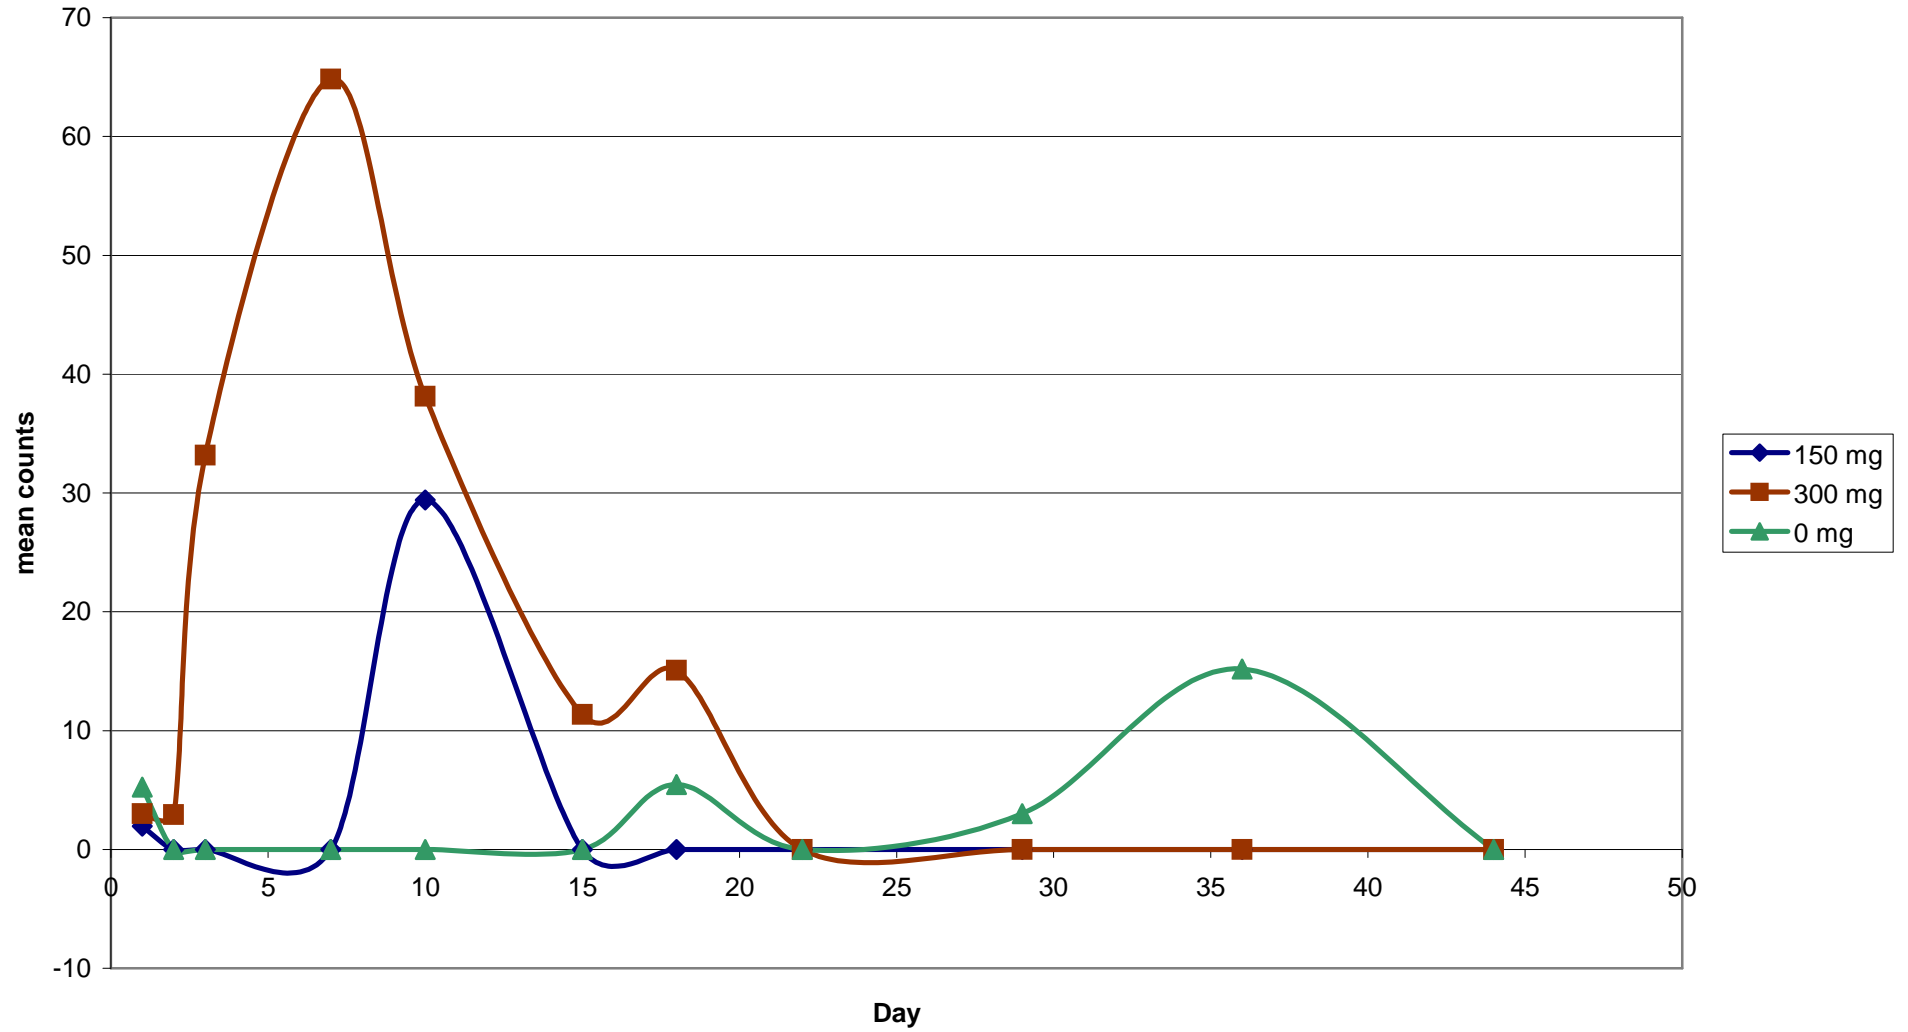

ID 13681

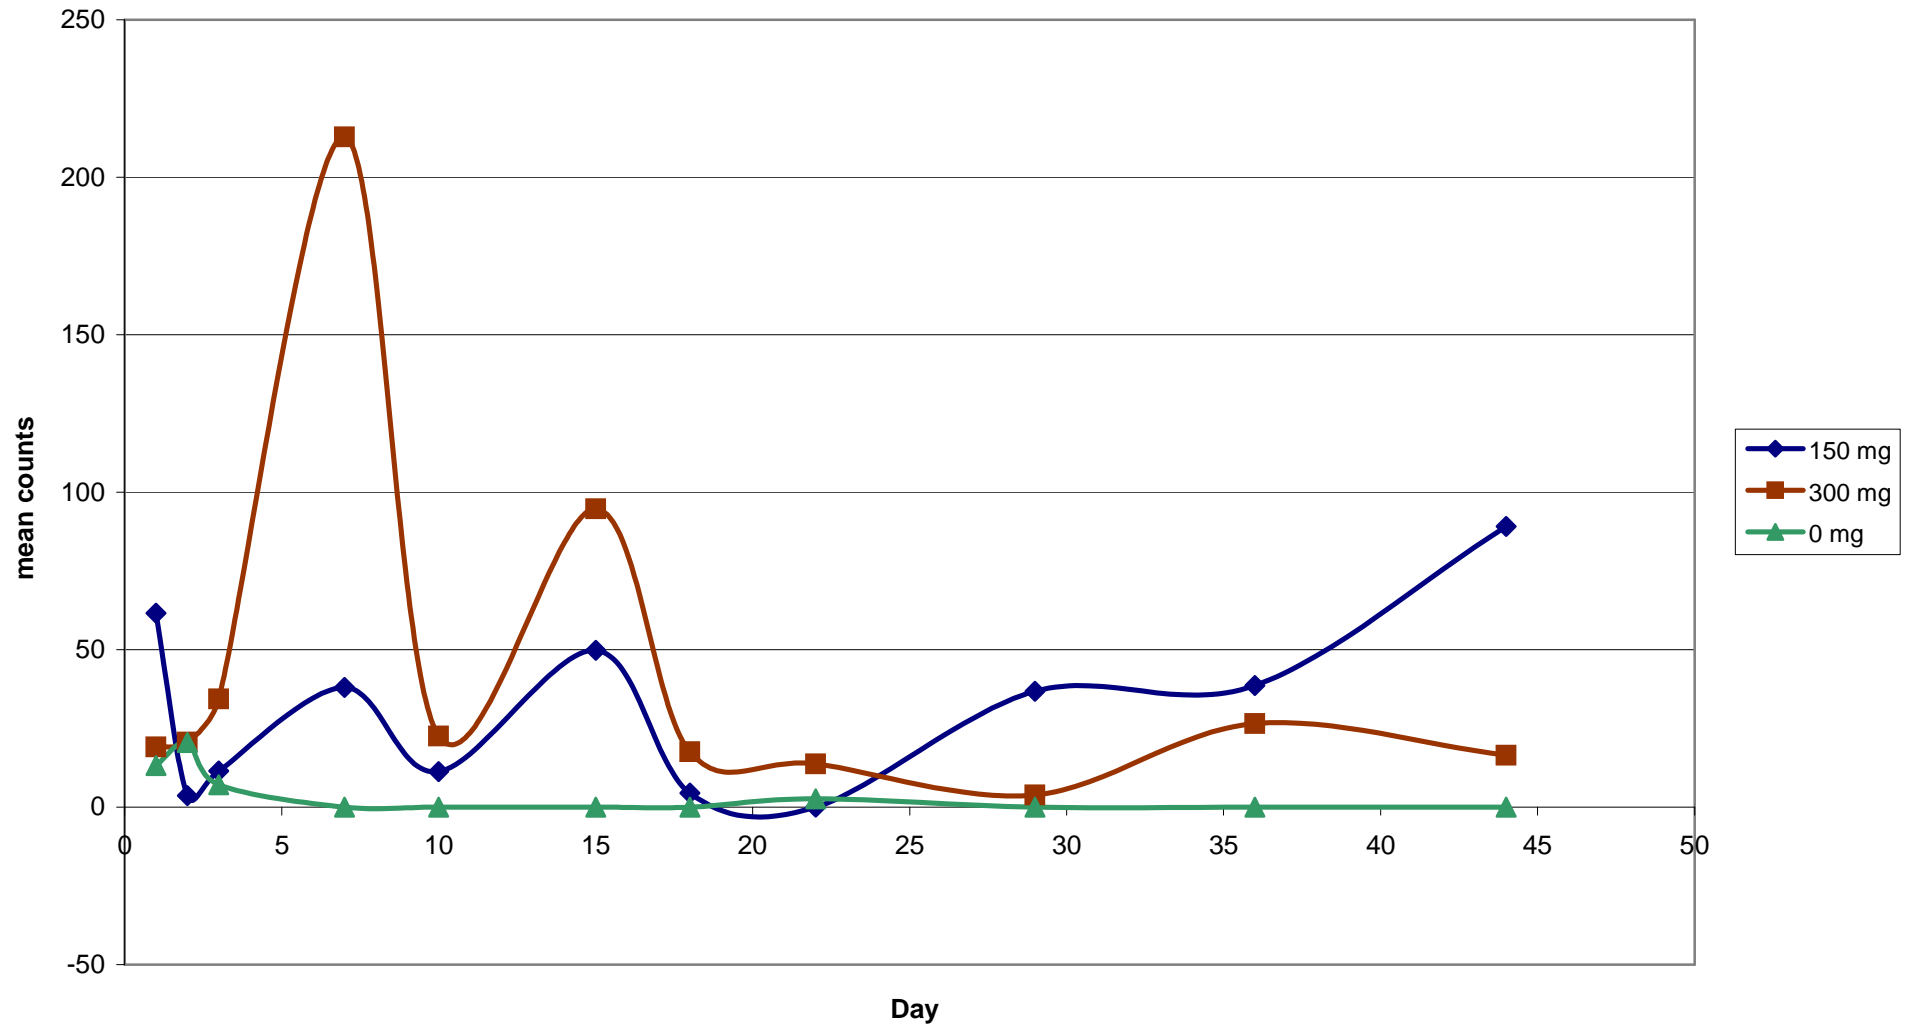

ID 13721

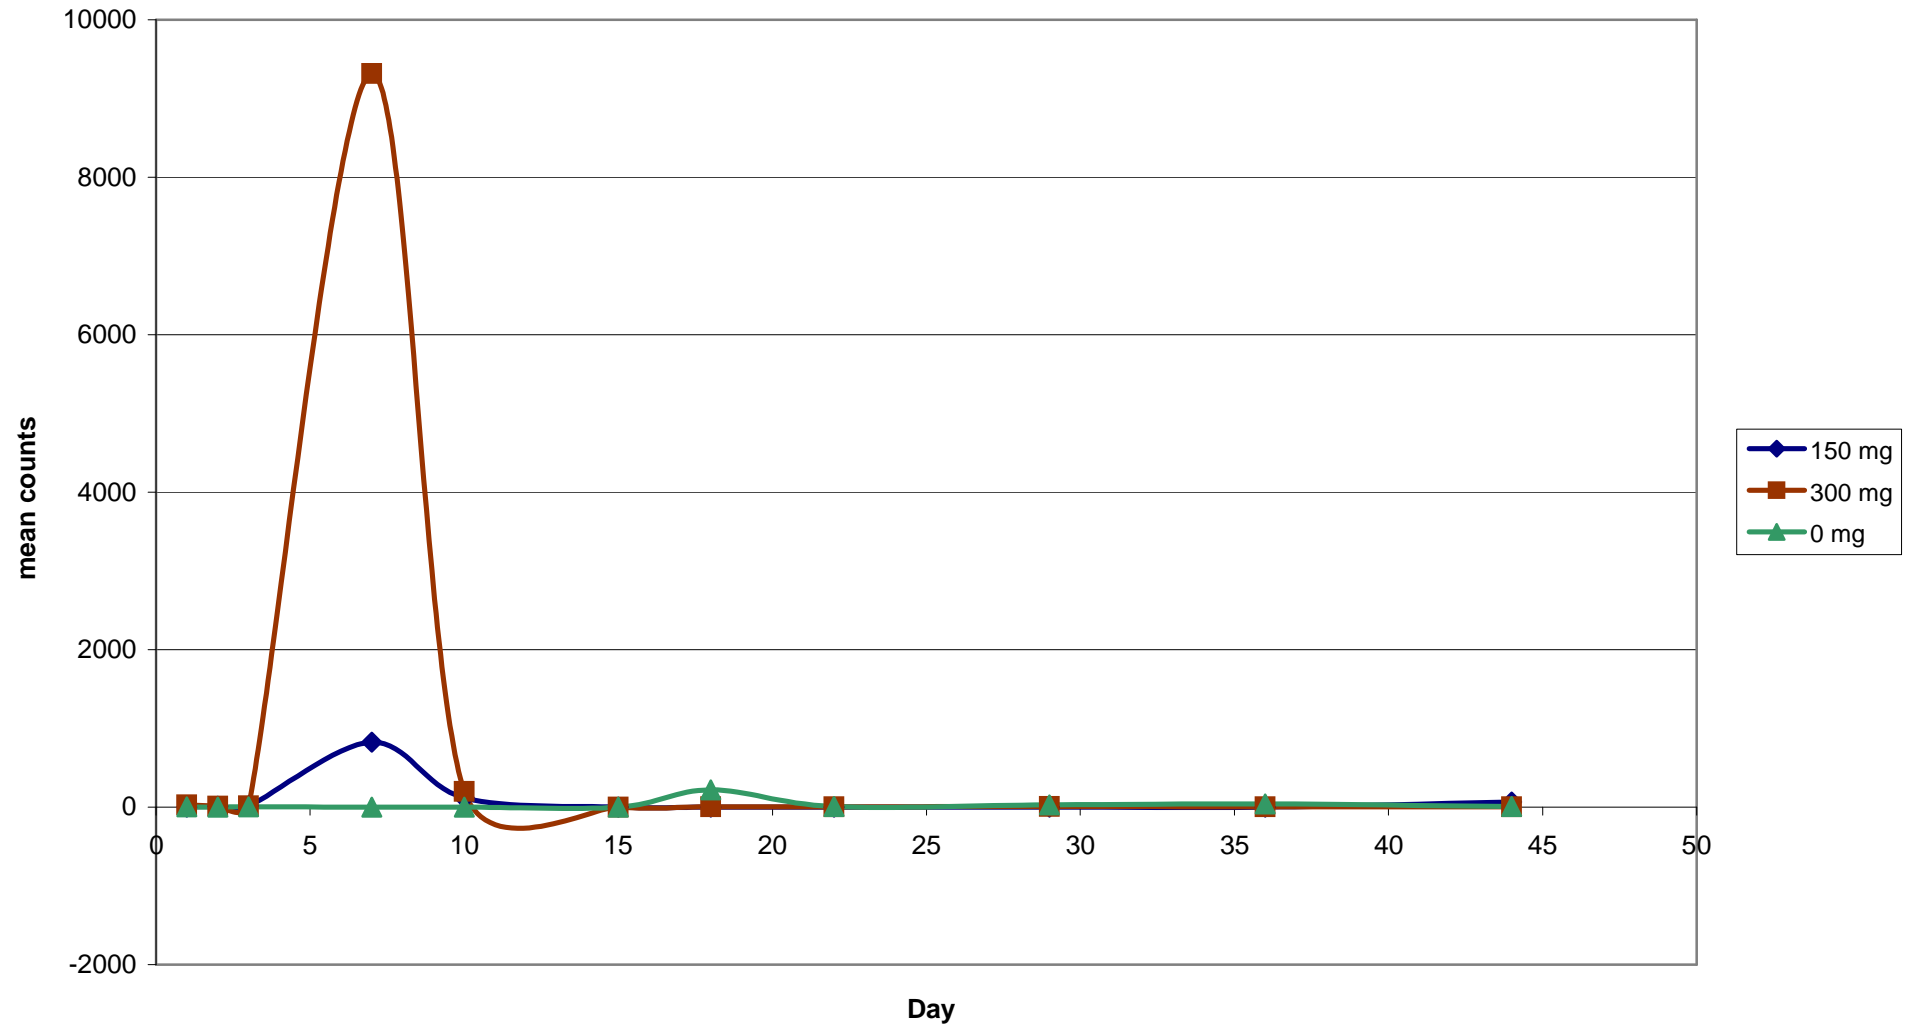

ID 13742

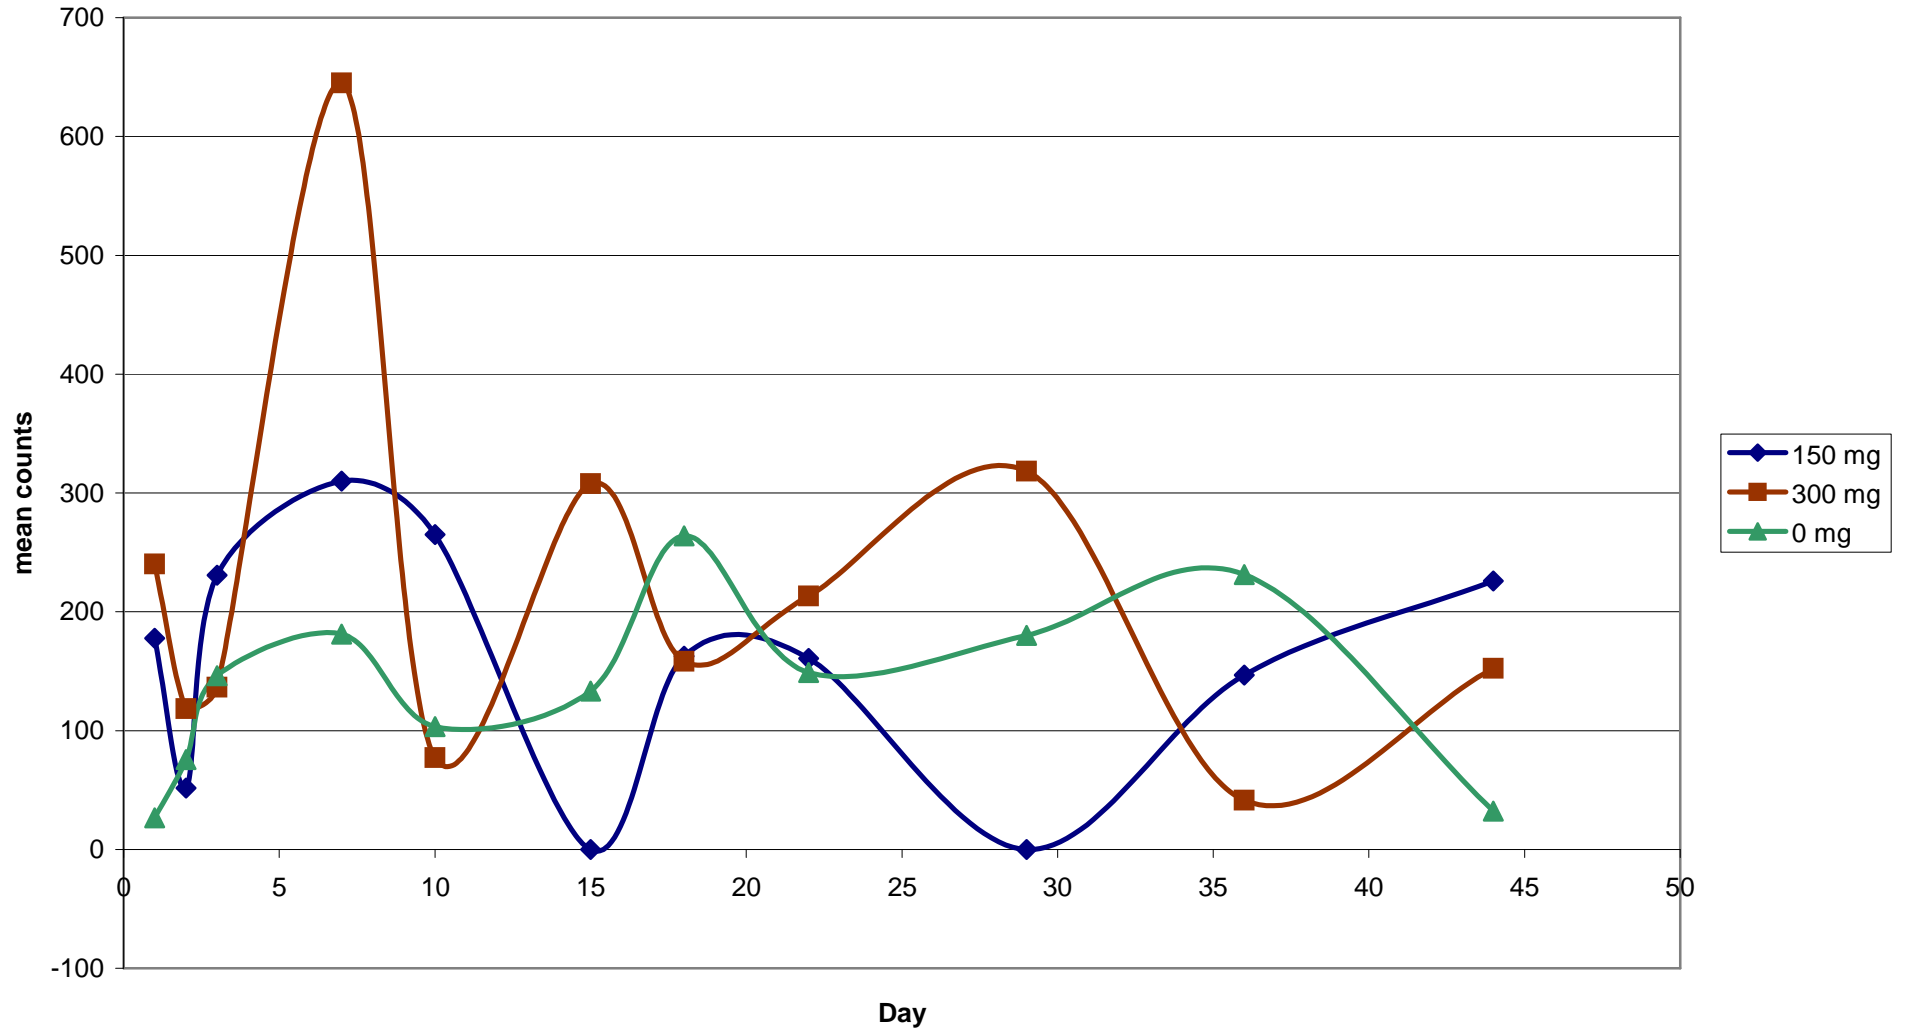



ID 14076

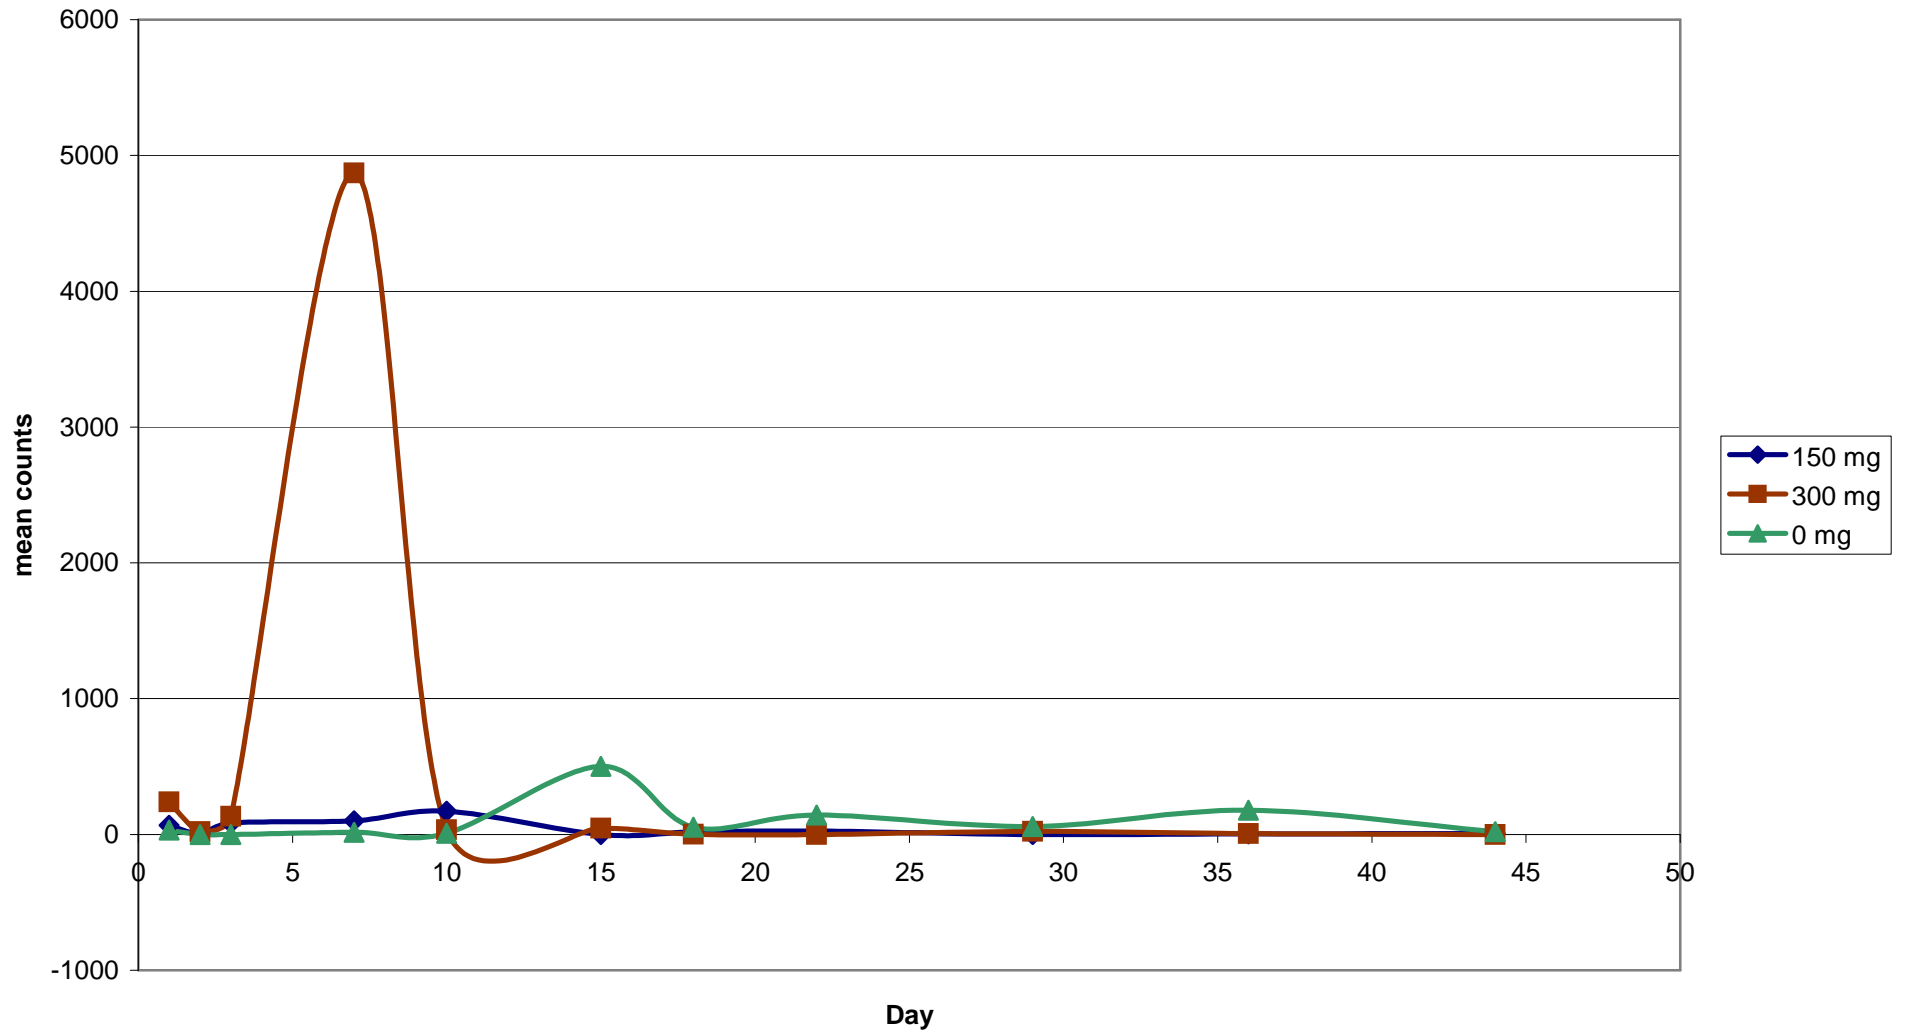

ID 15765

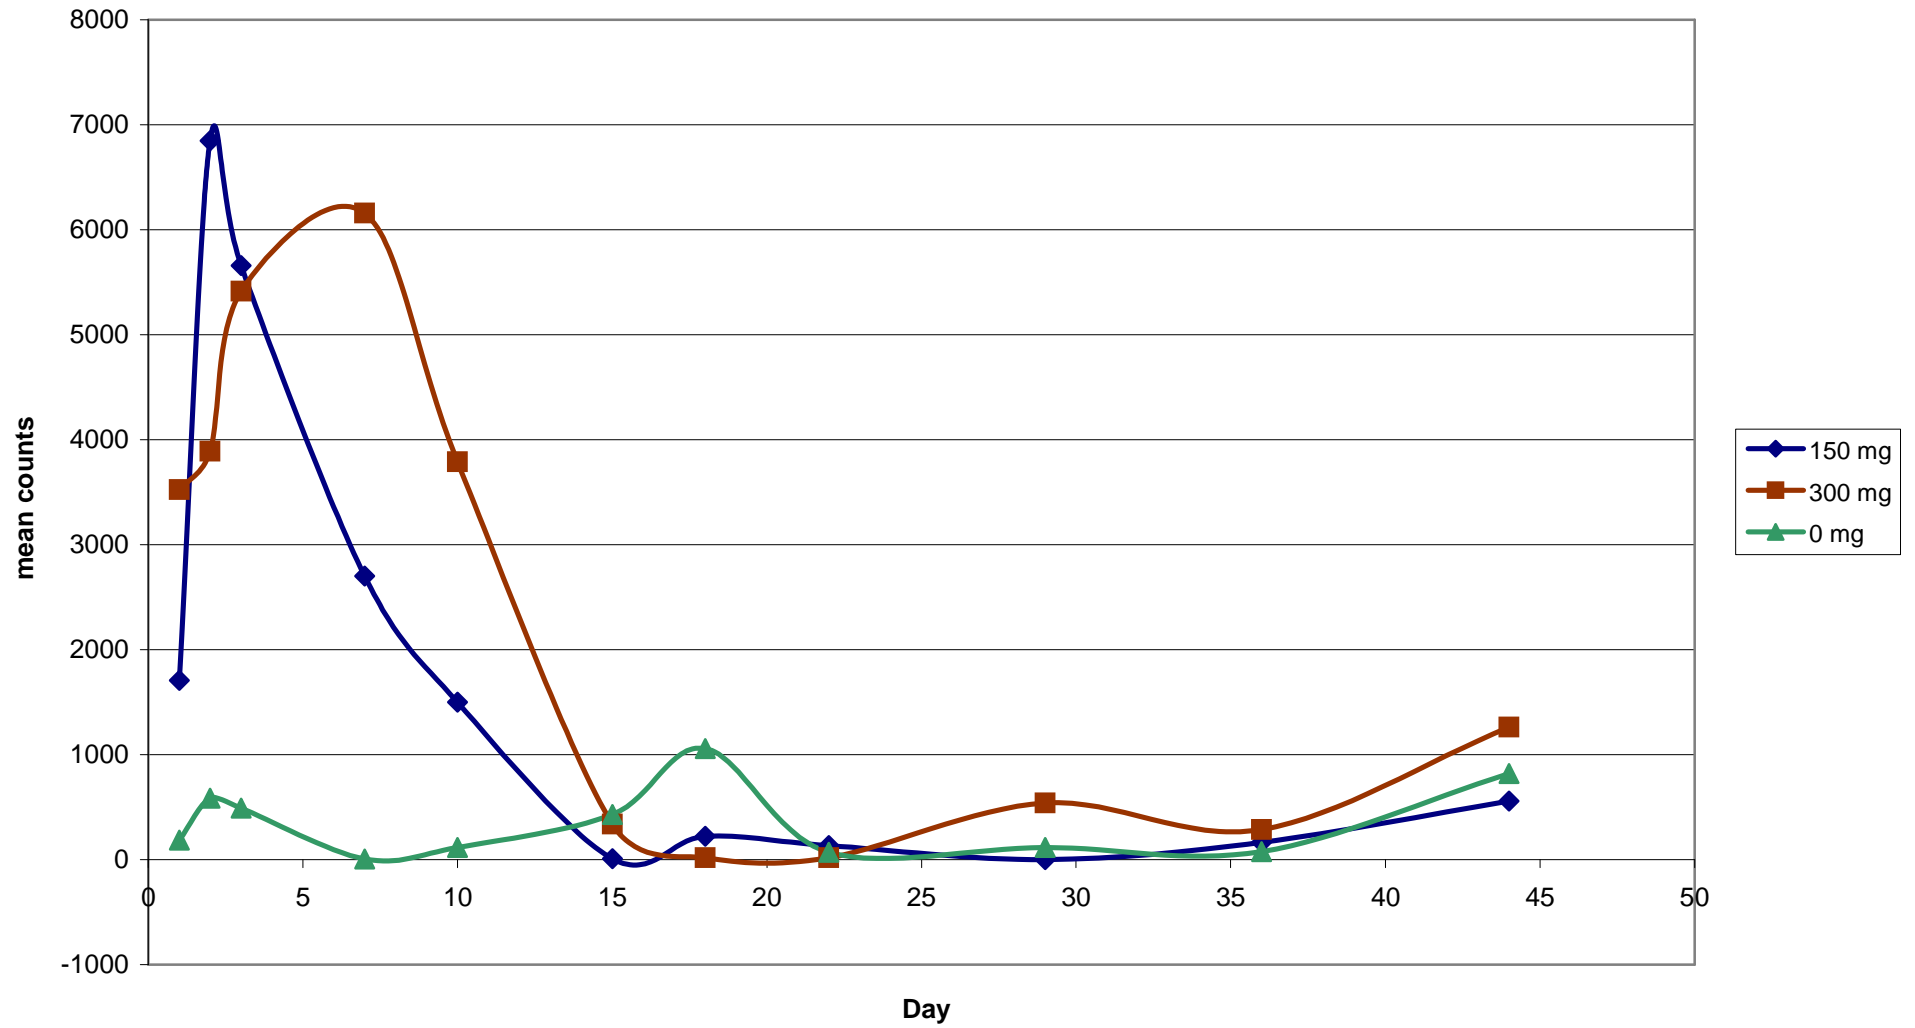

ID 15821

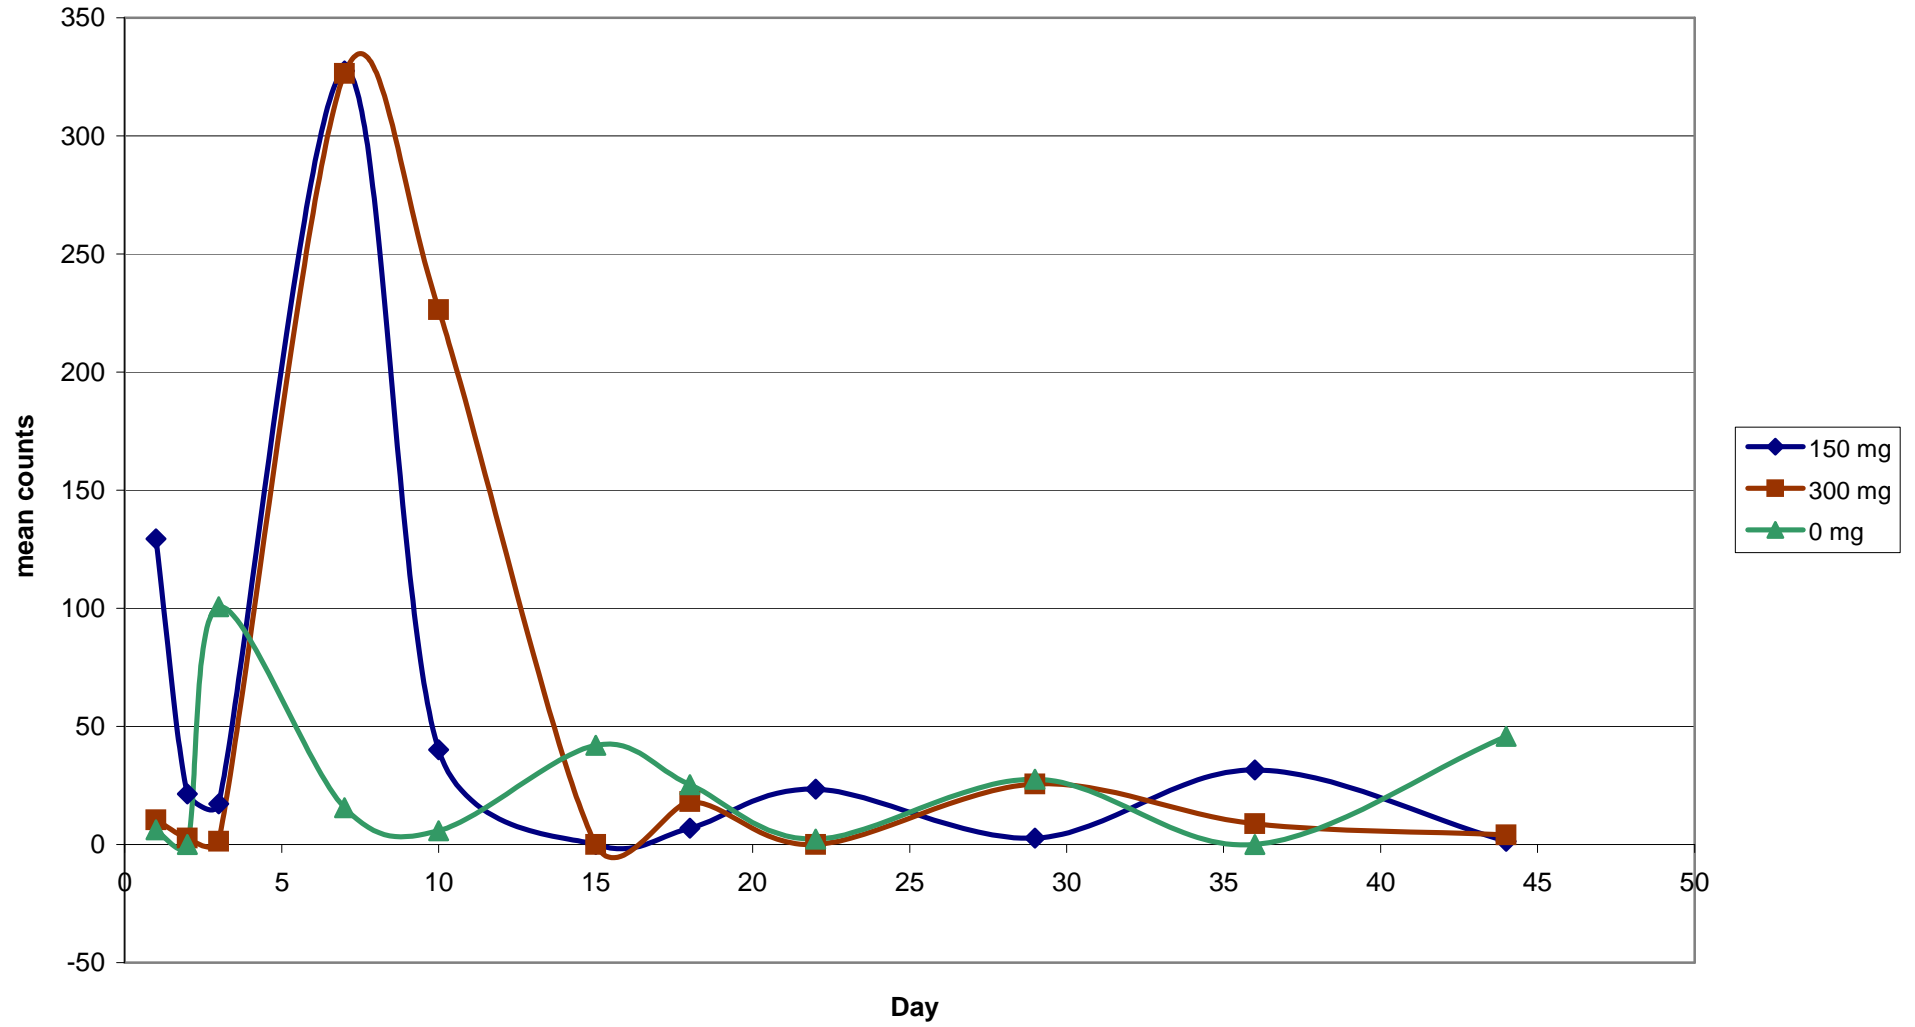

ID 16194

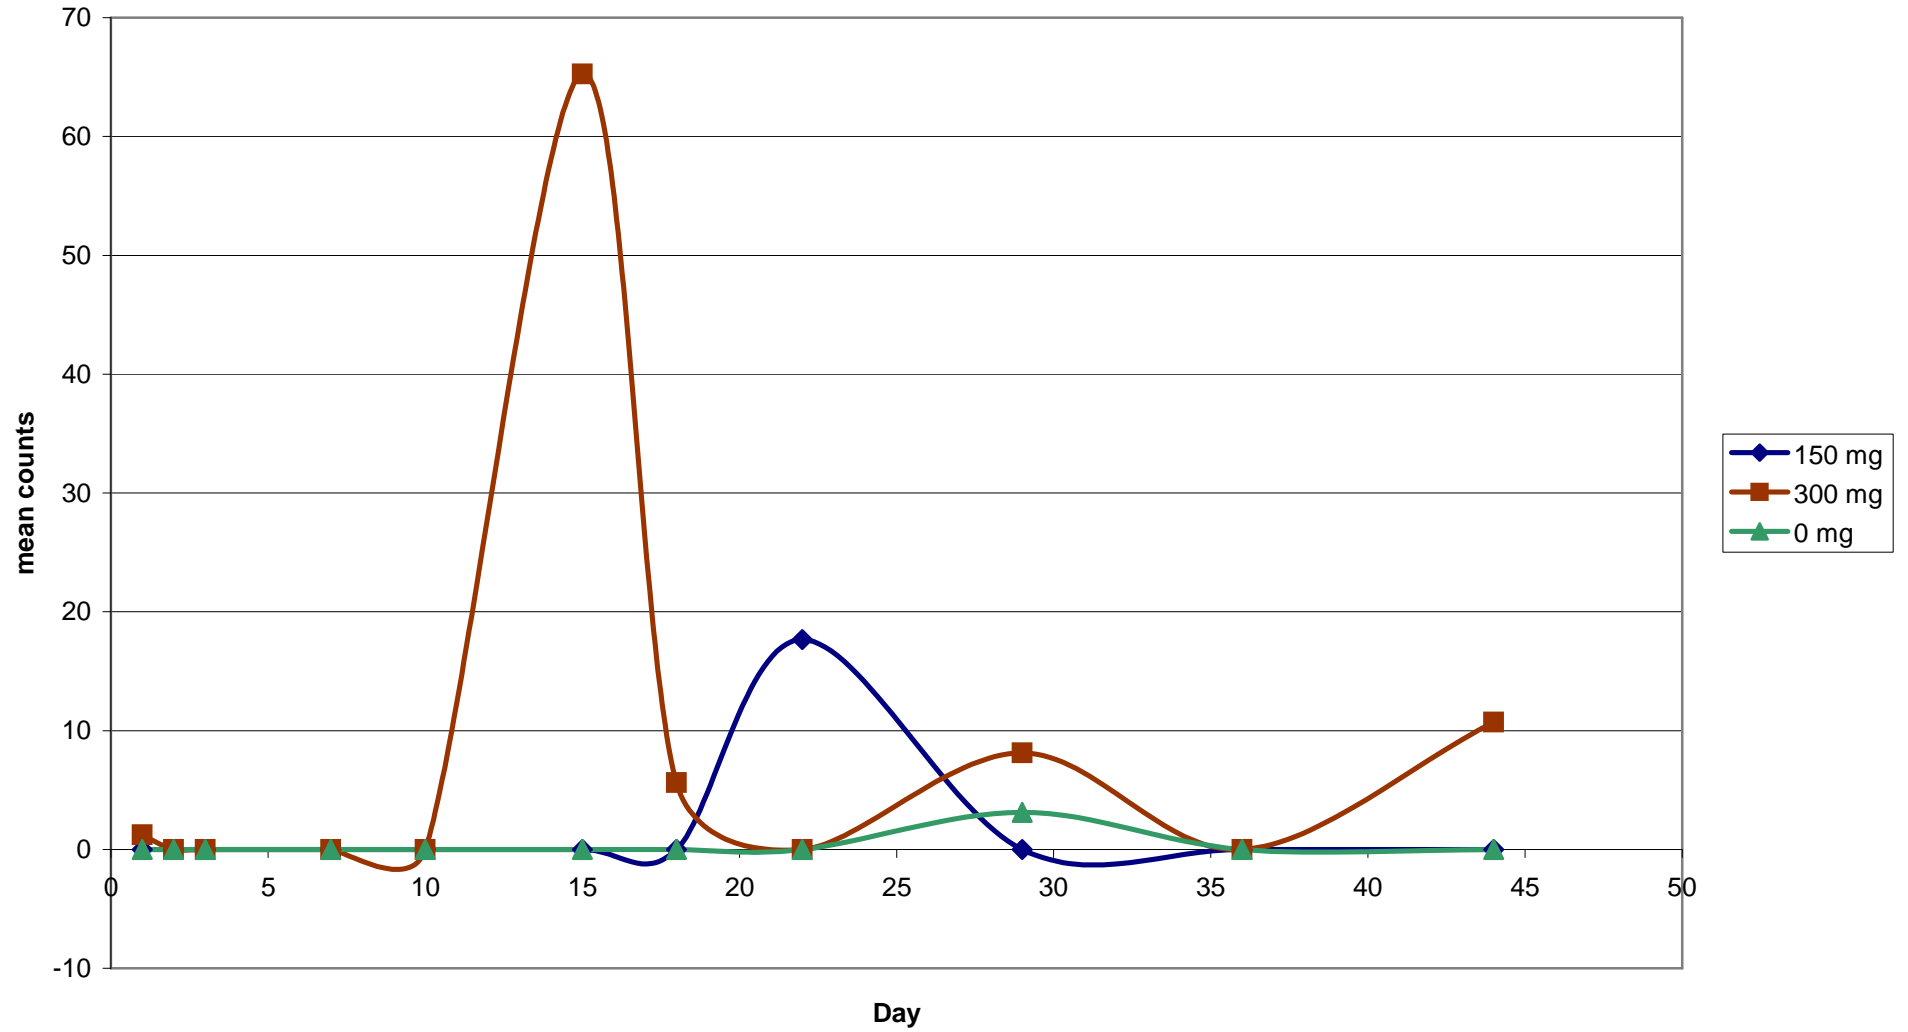

ID 16657

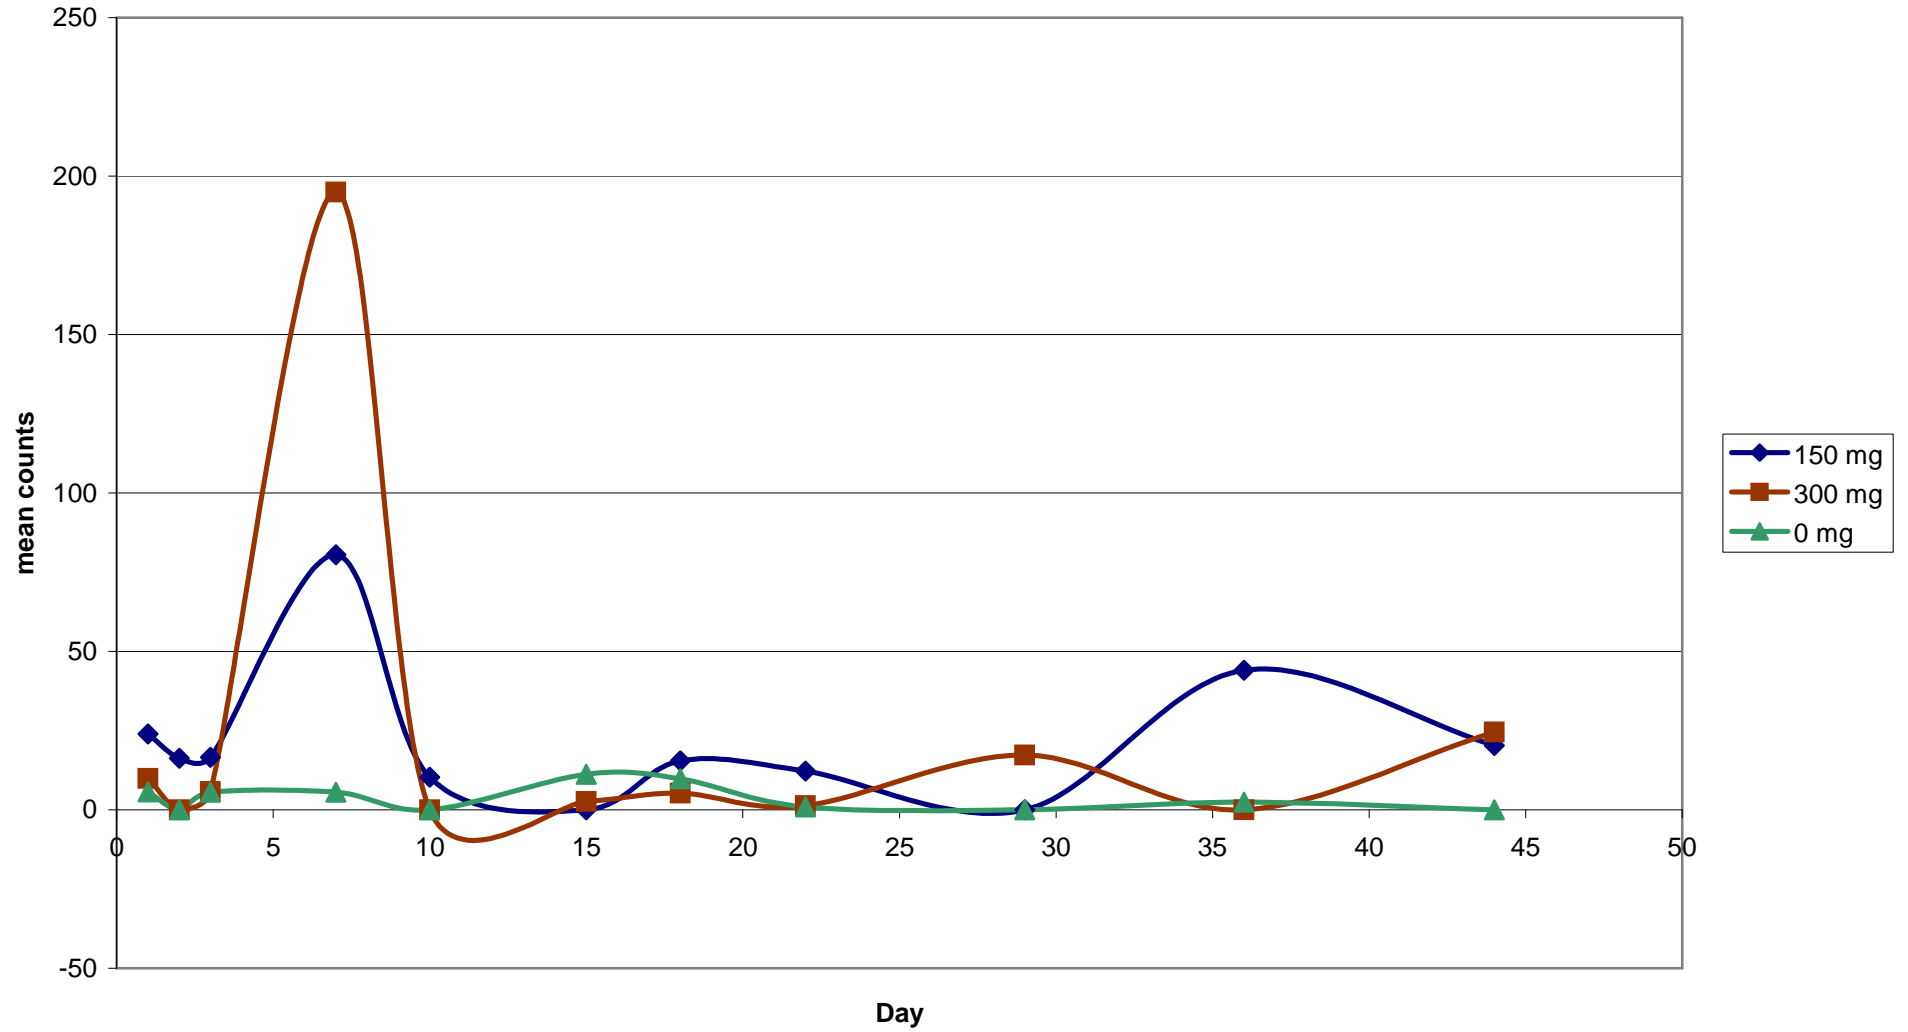

ID 16691

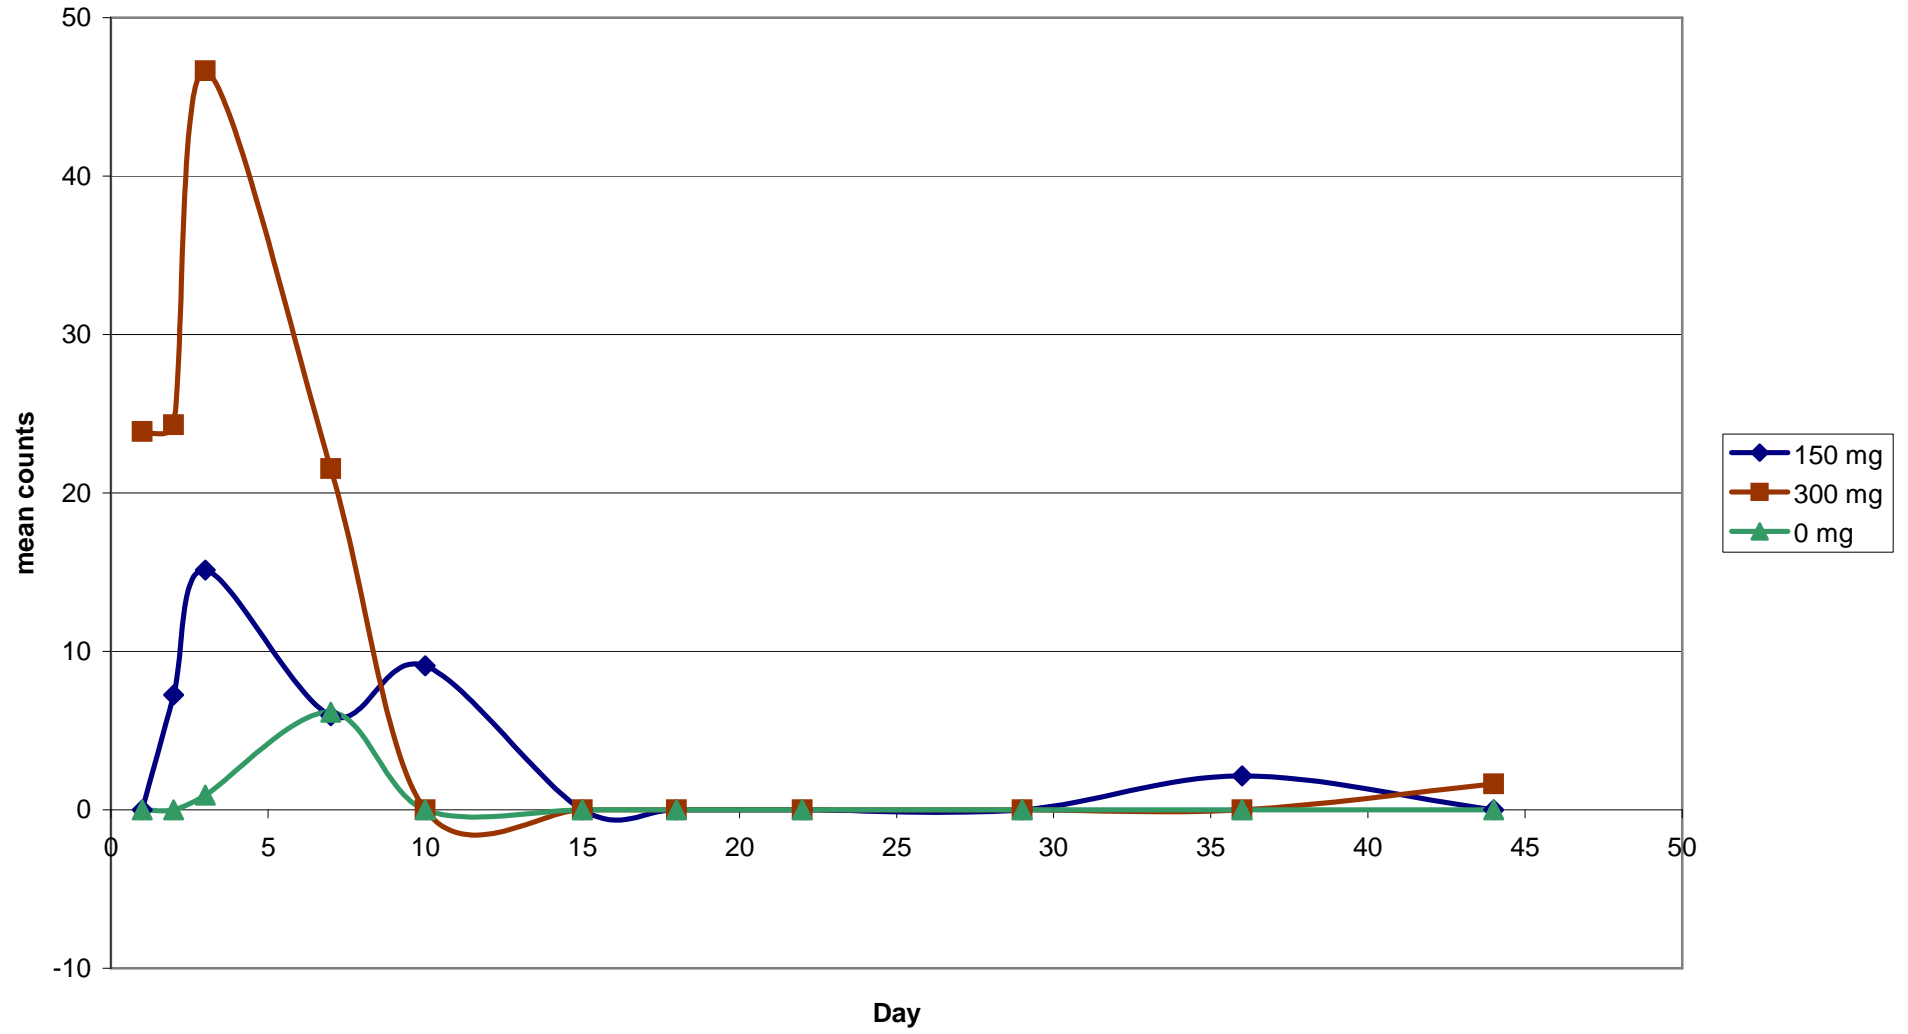

ID 16851

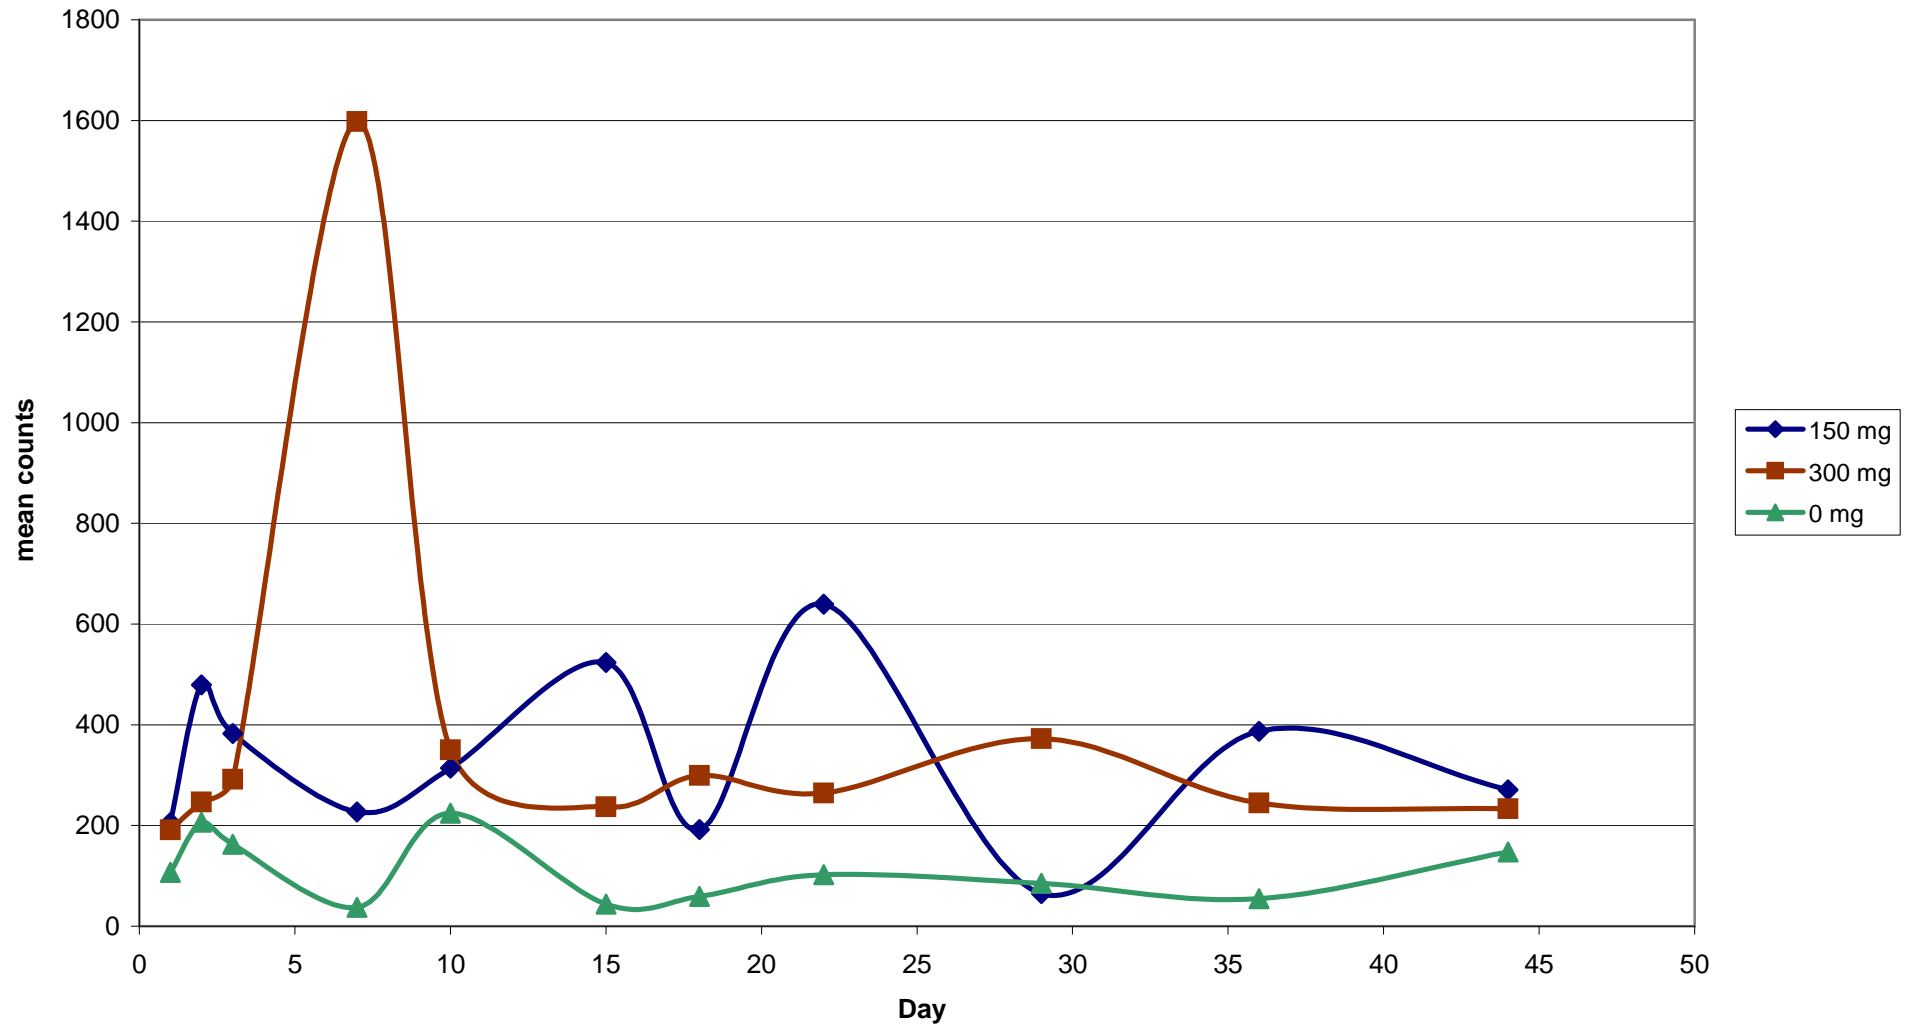

ID 16943

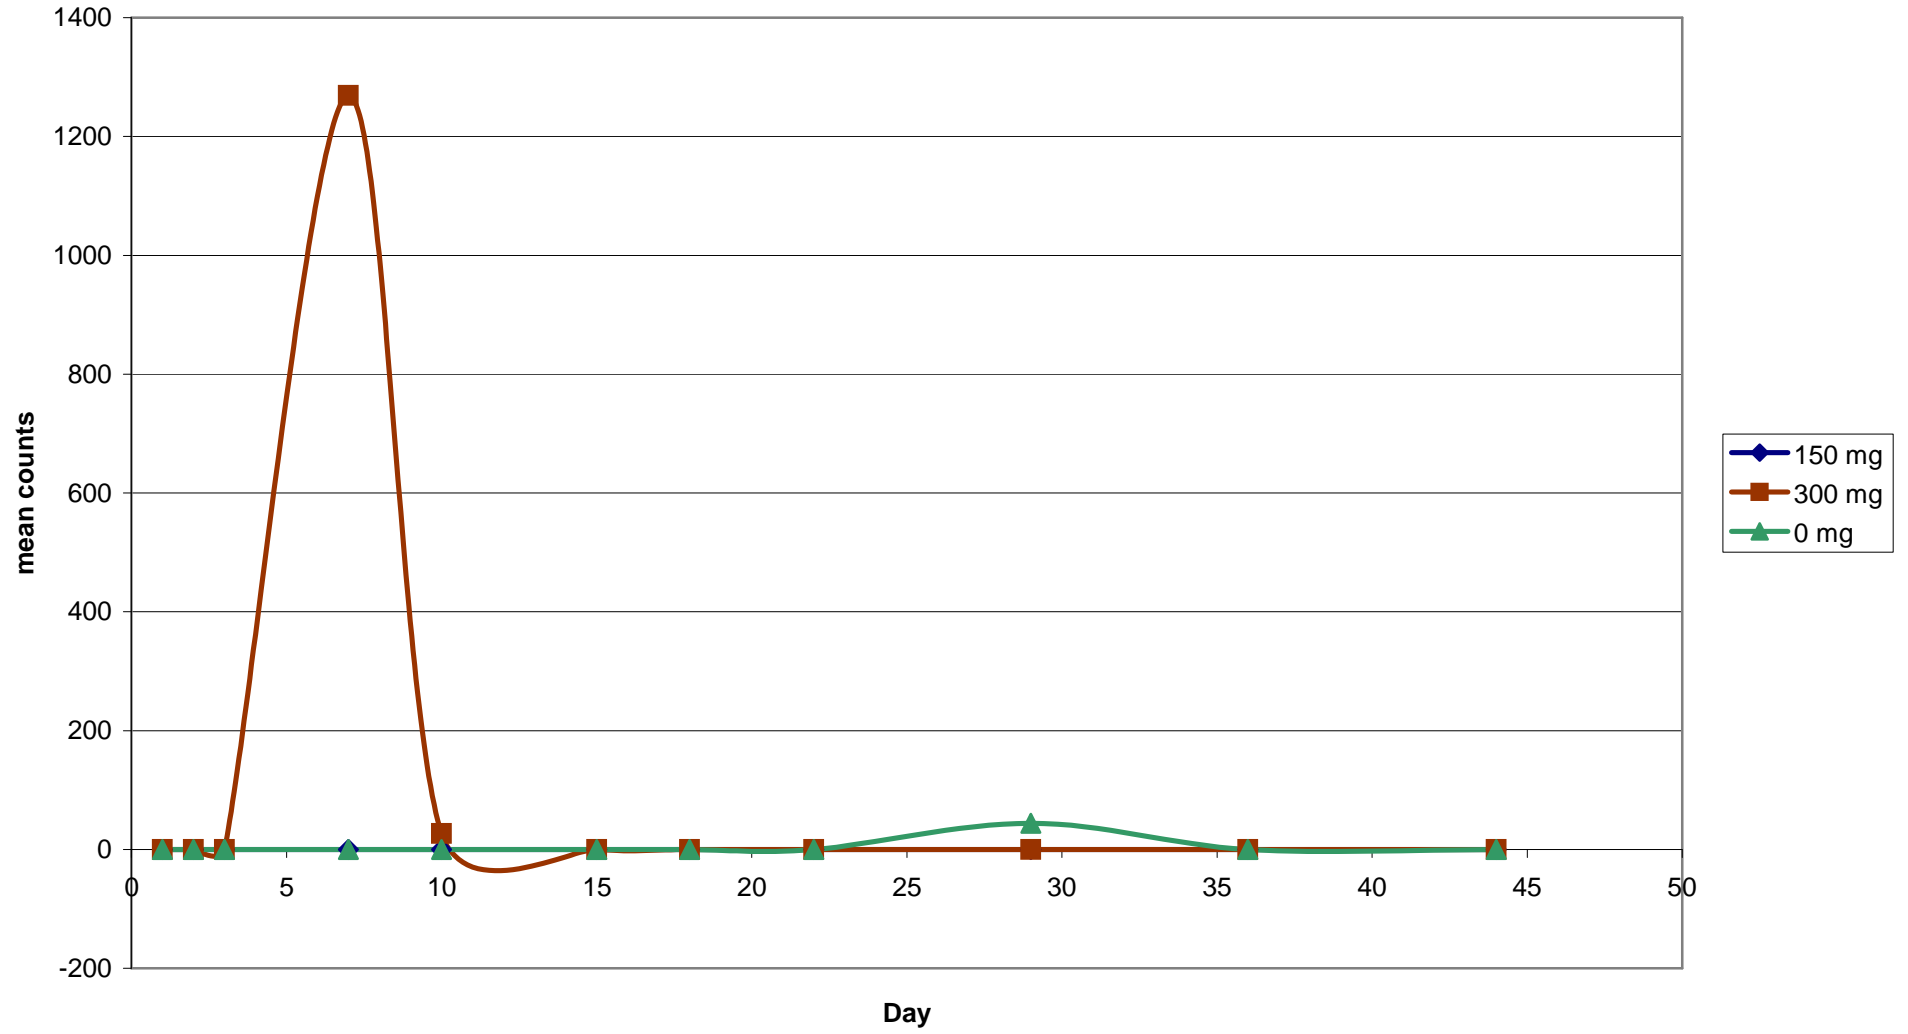



ID 18217

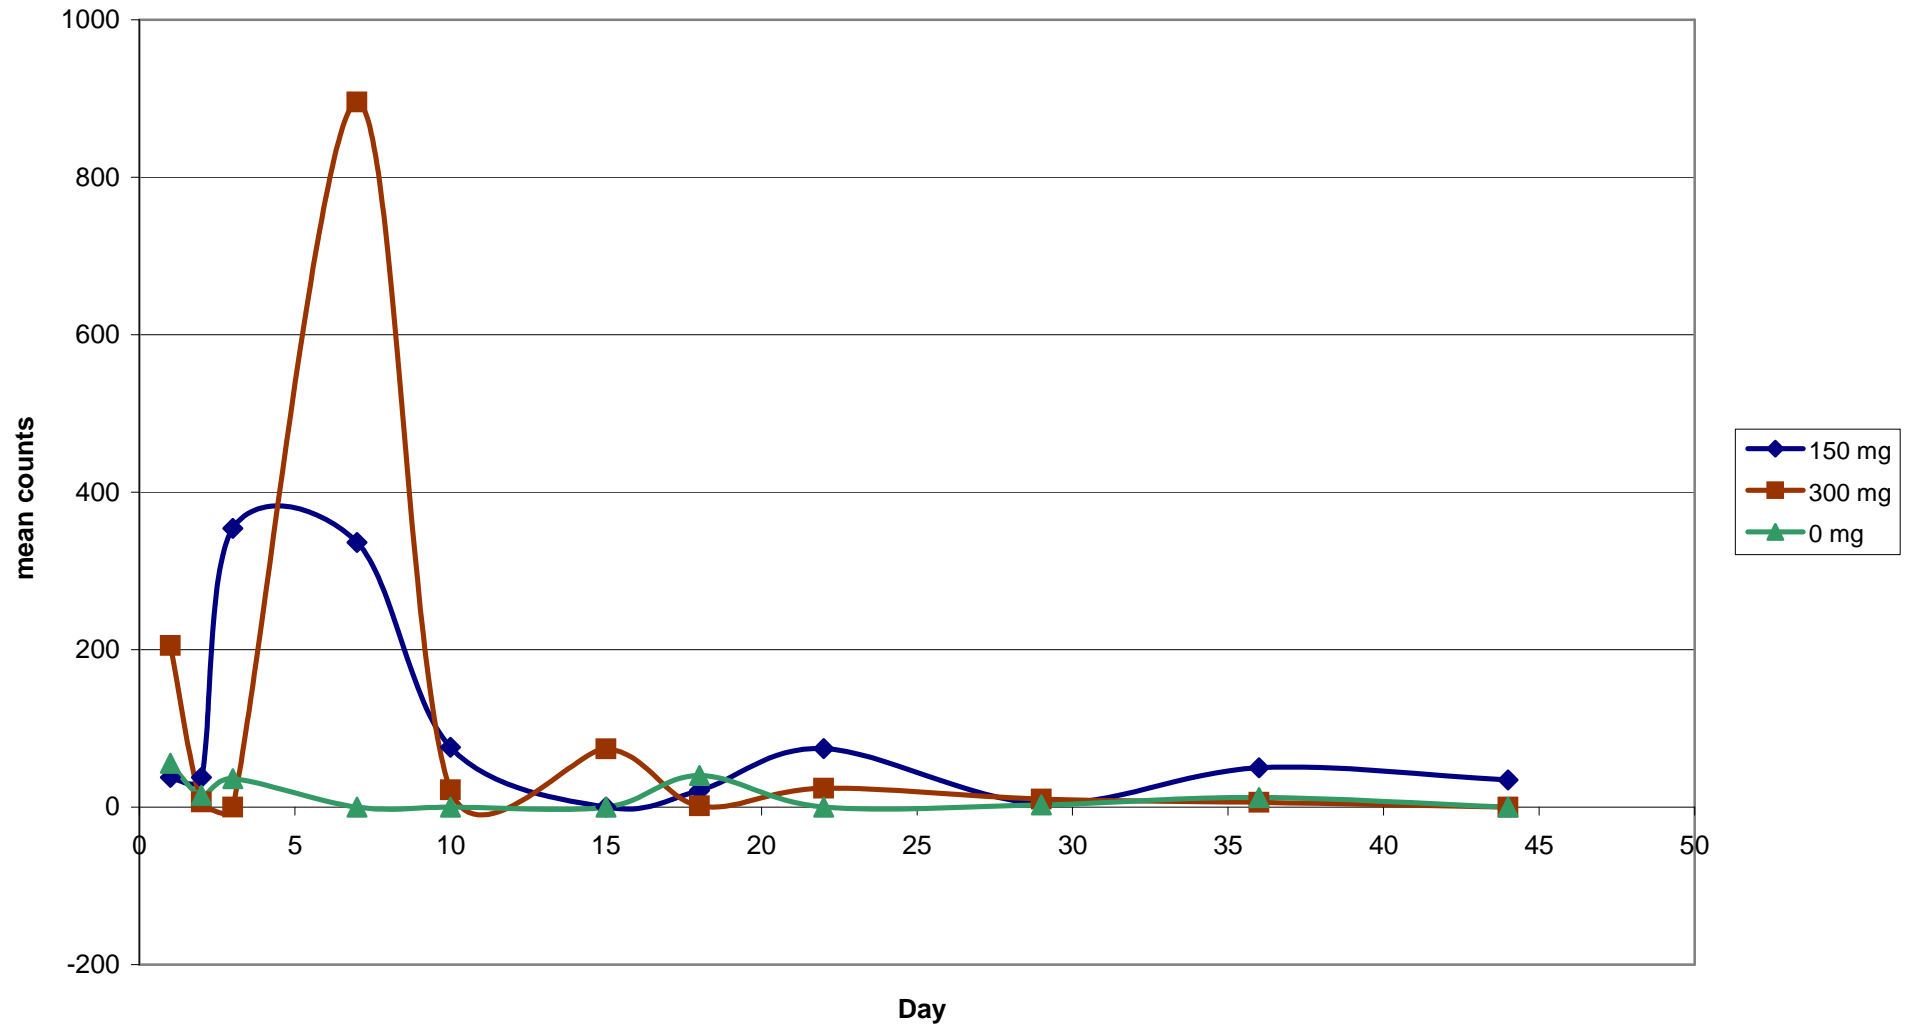

ID 21451

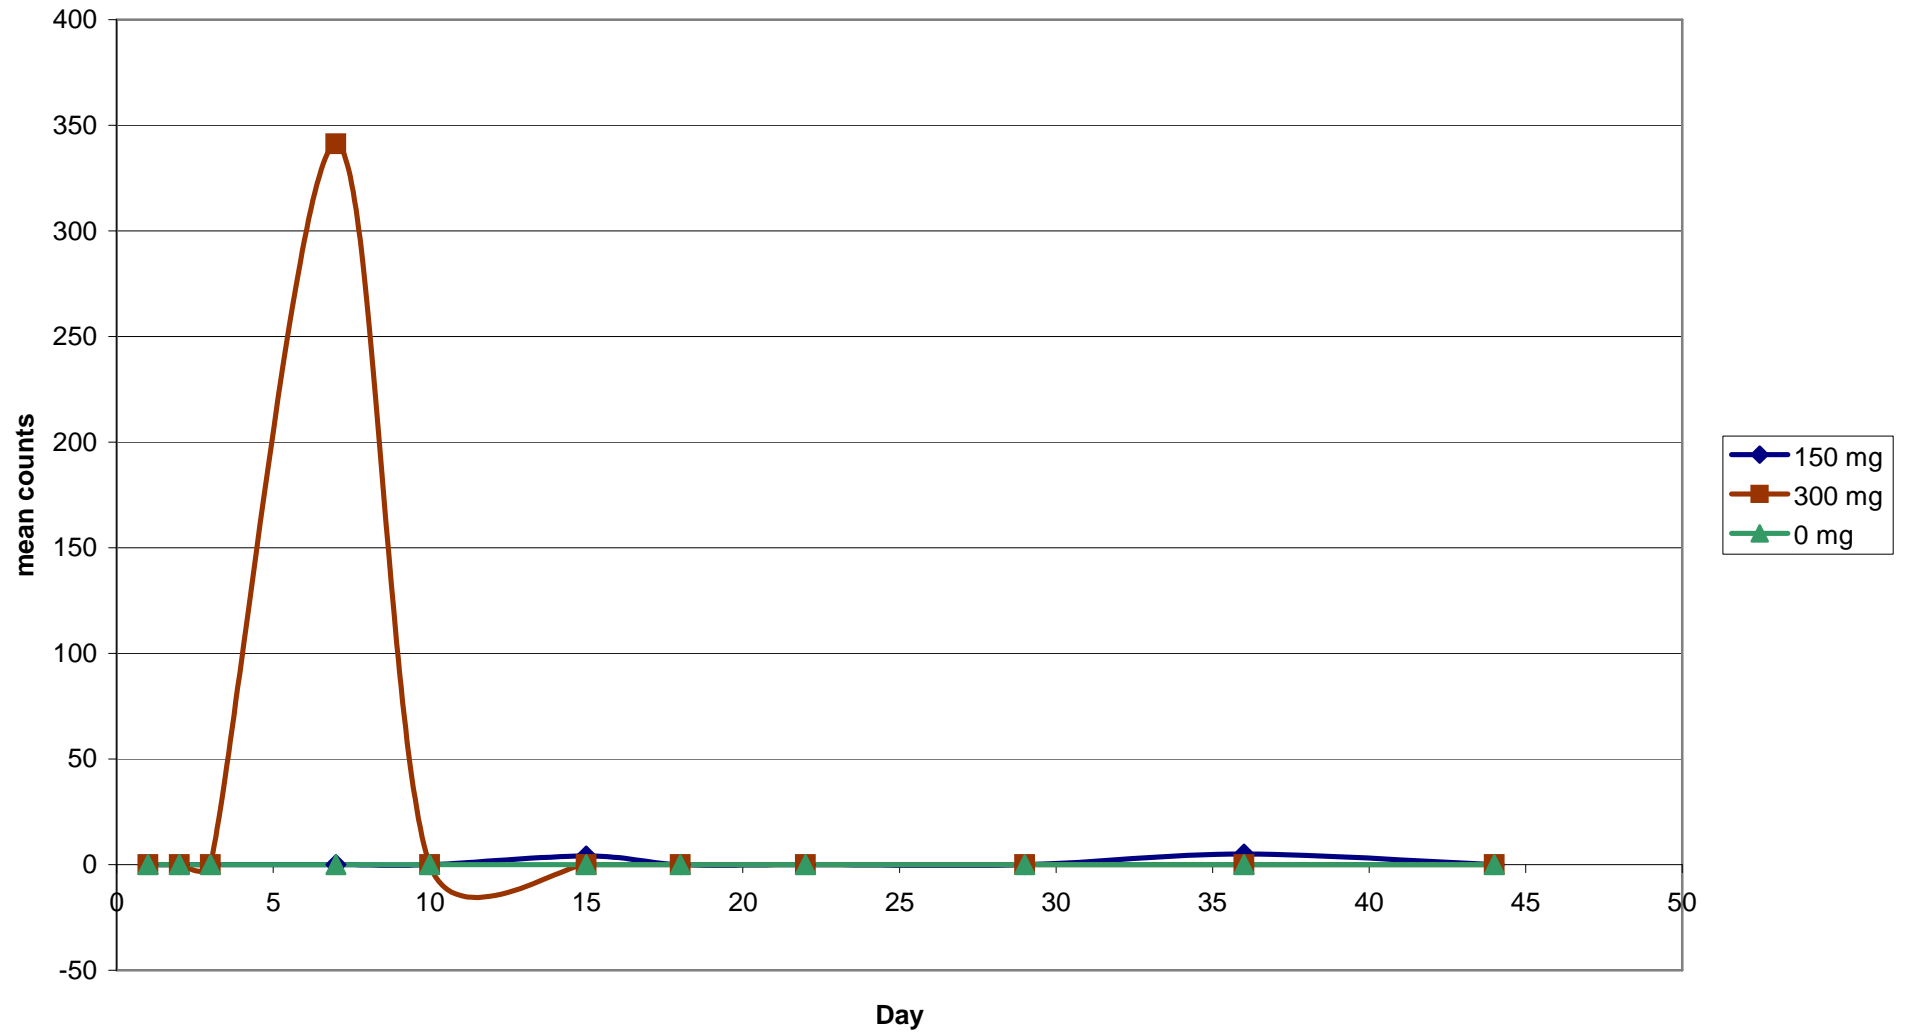

ID 21880

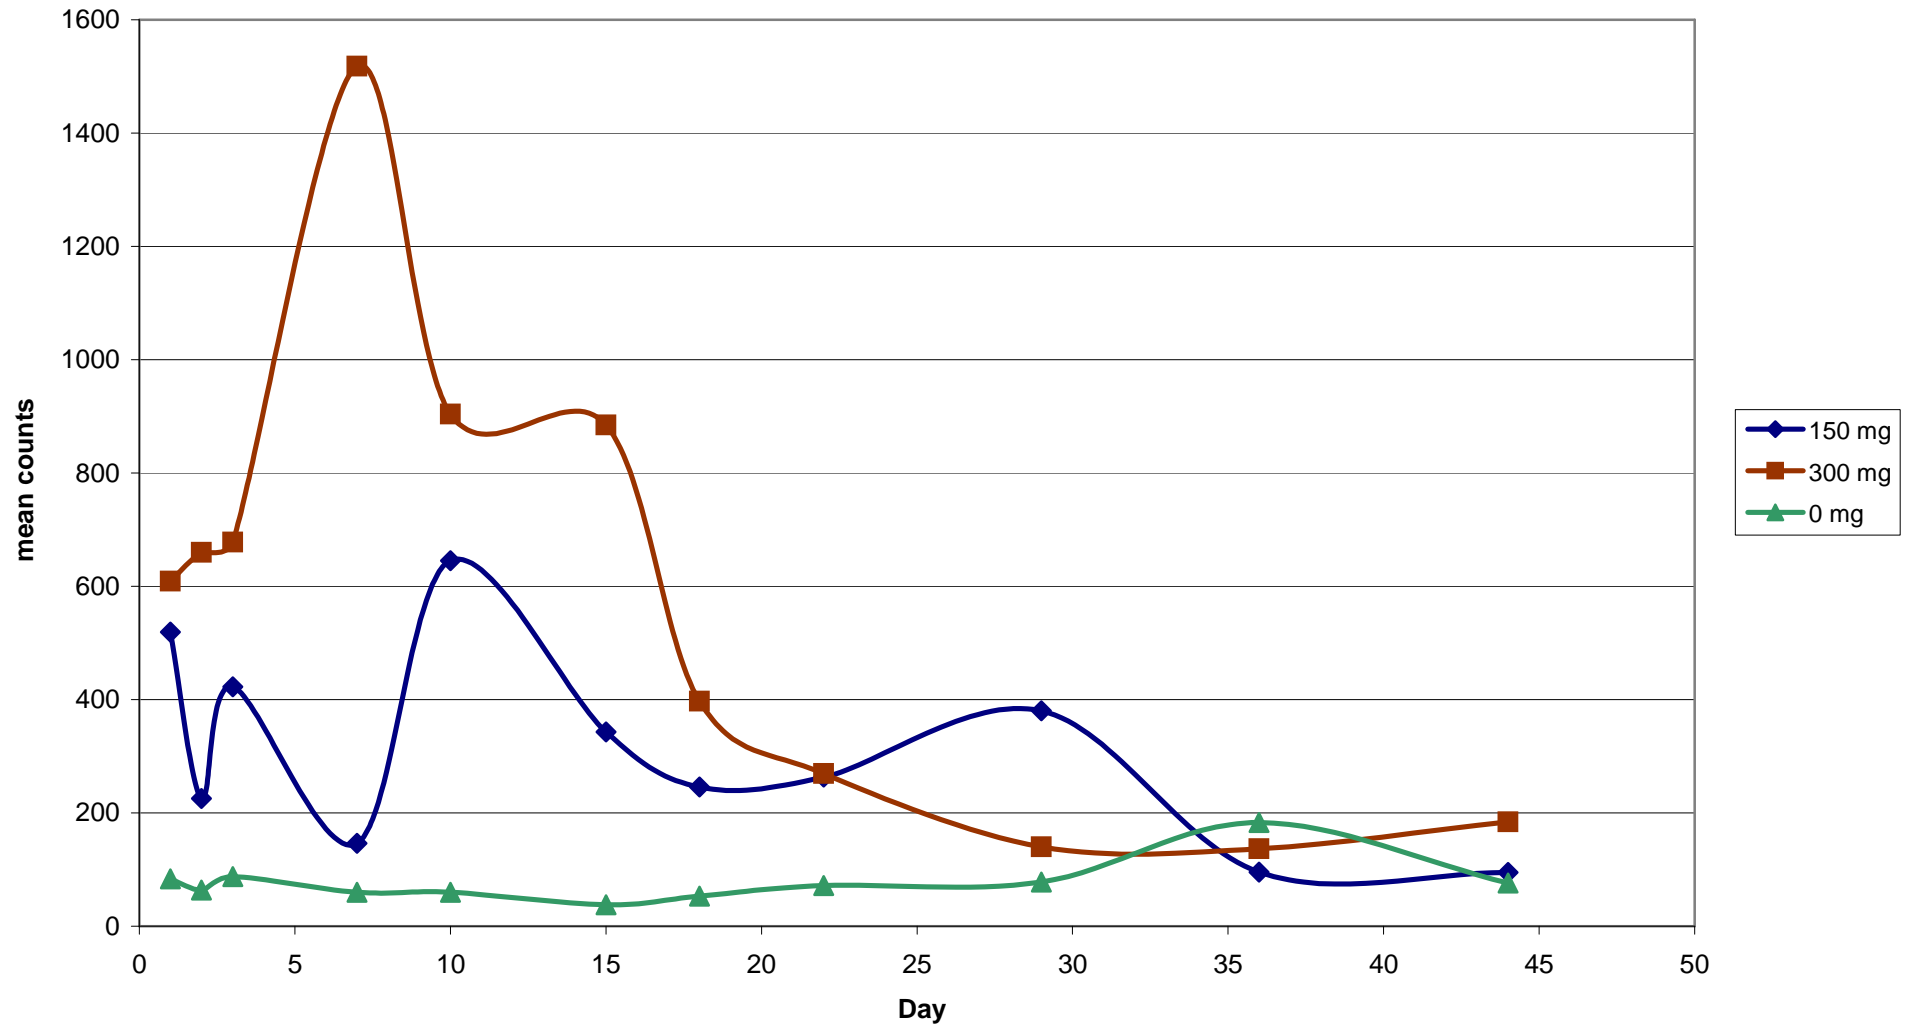

ID 29540

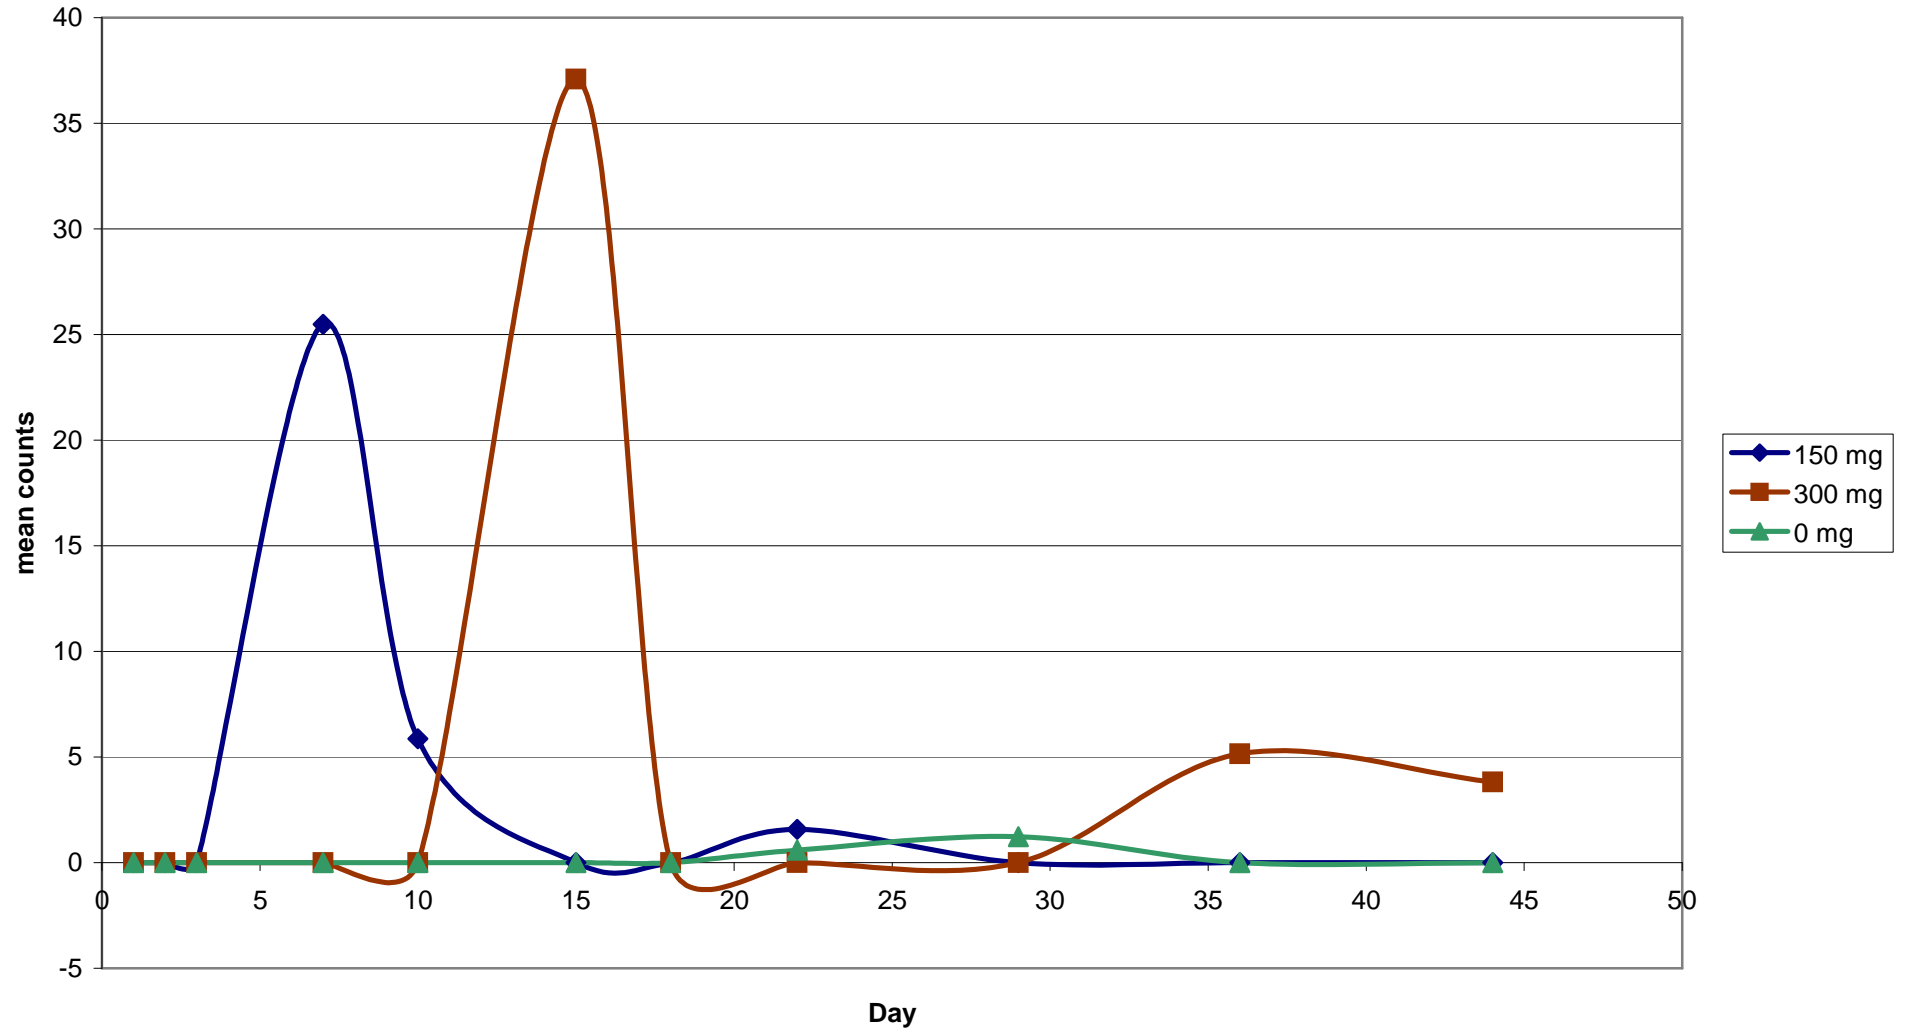

ID 33097

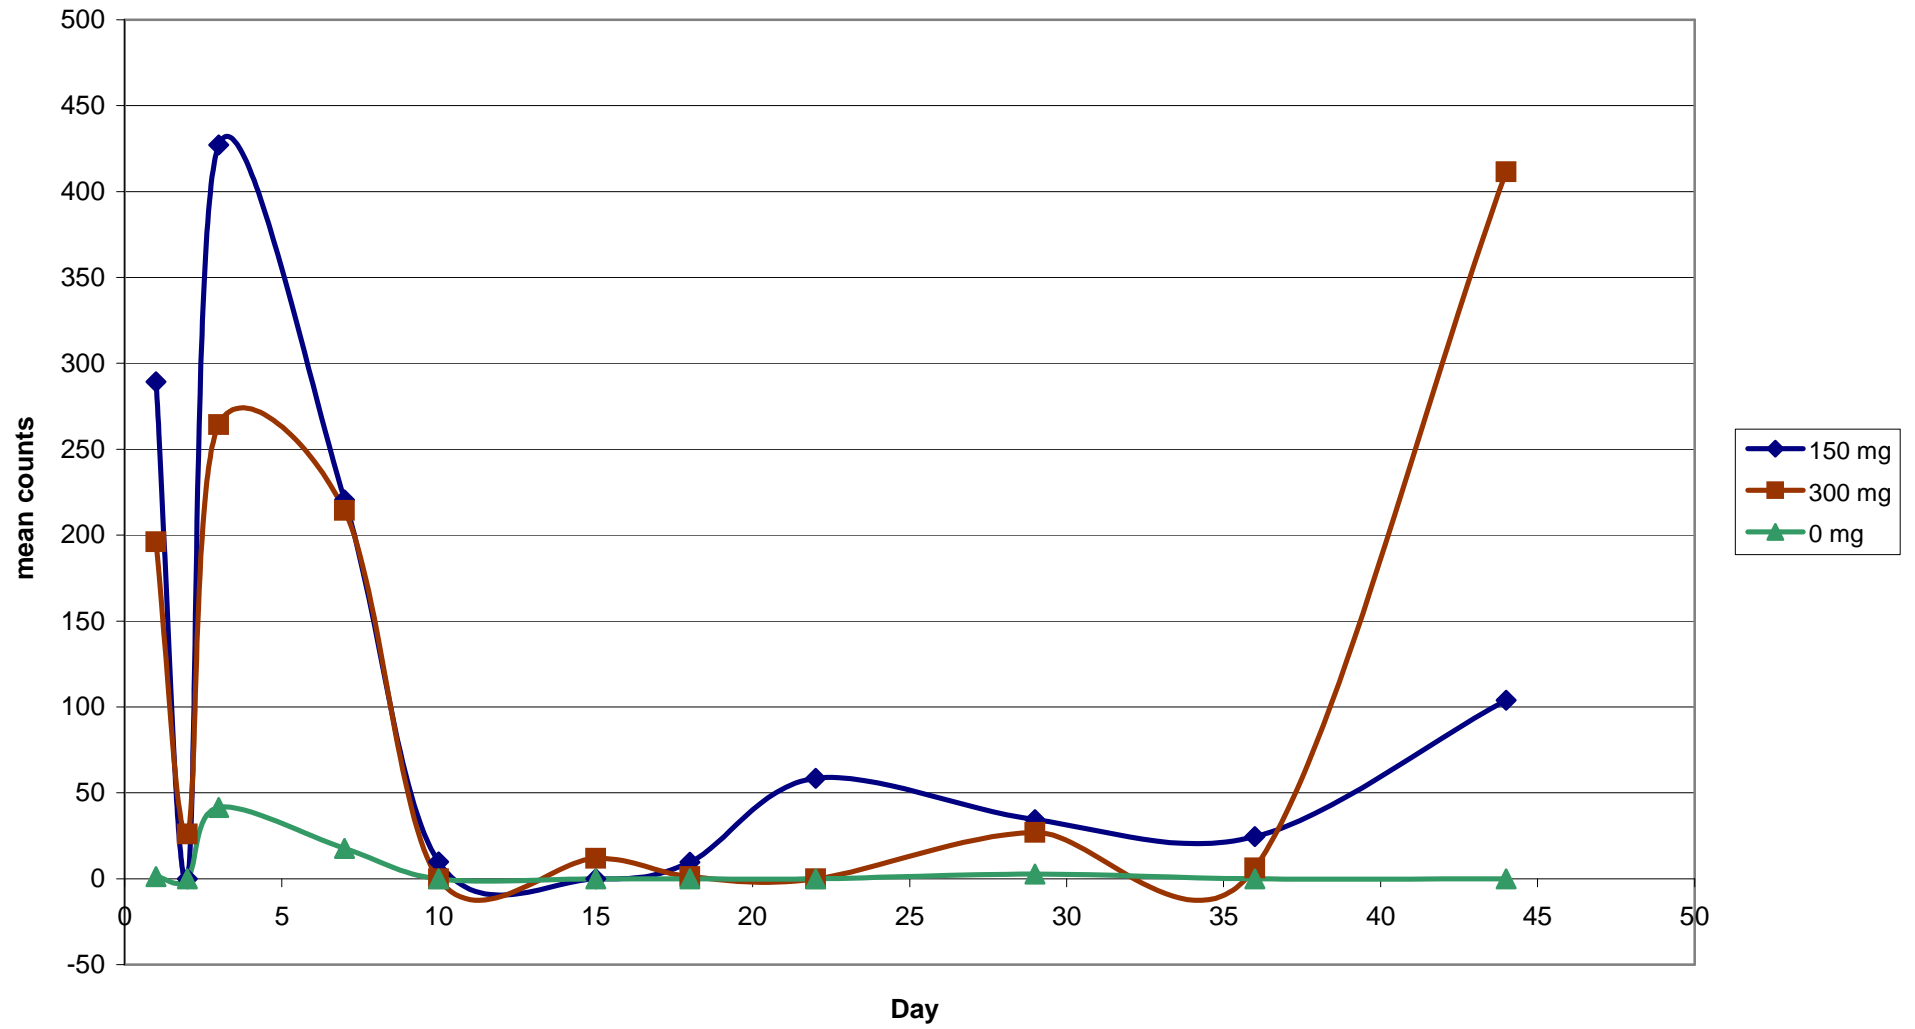

ID 33651

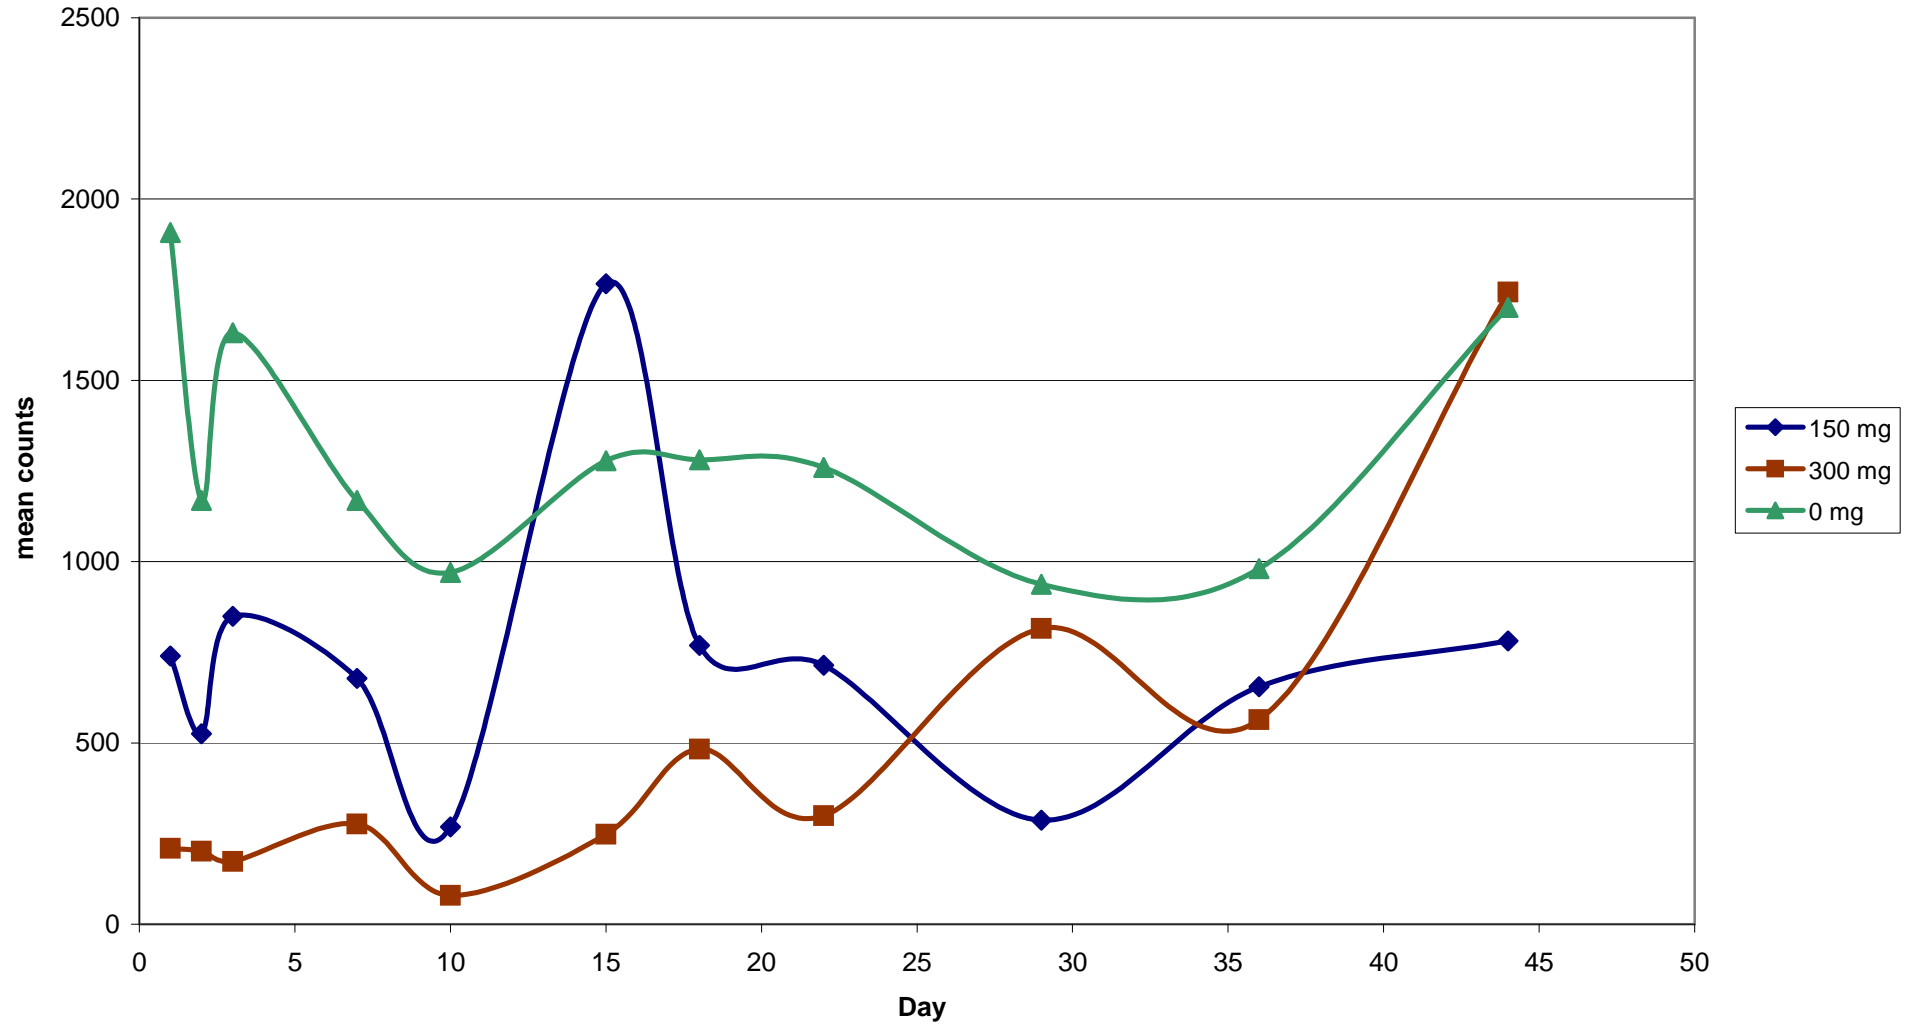

ID 35475

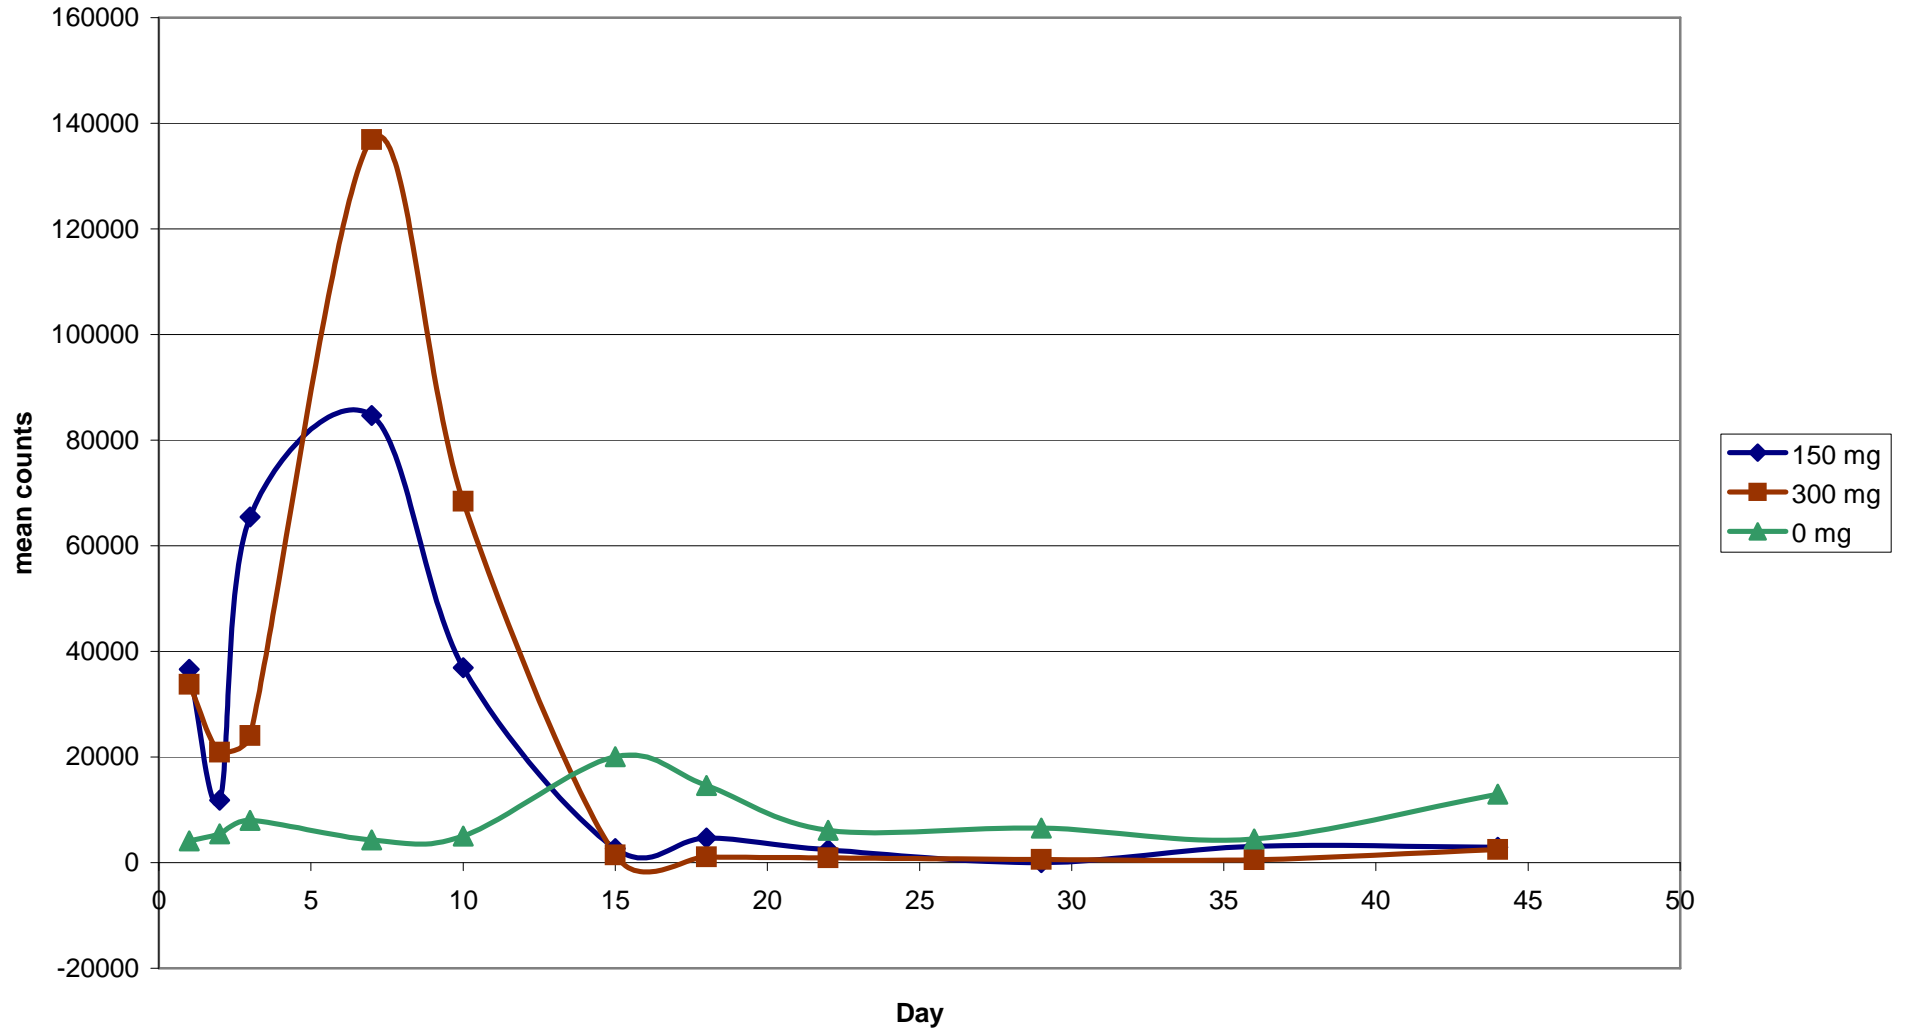

ID 10163

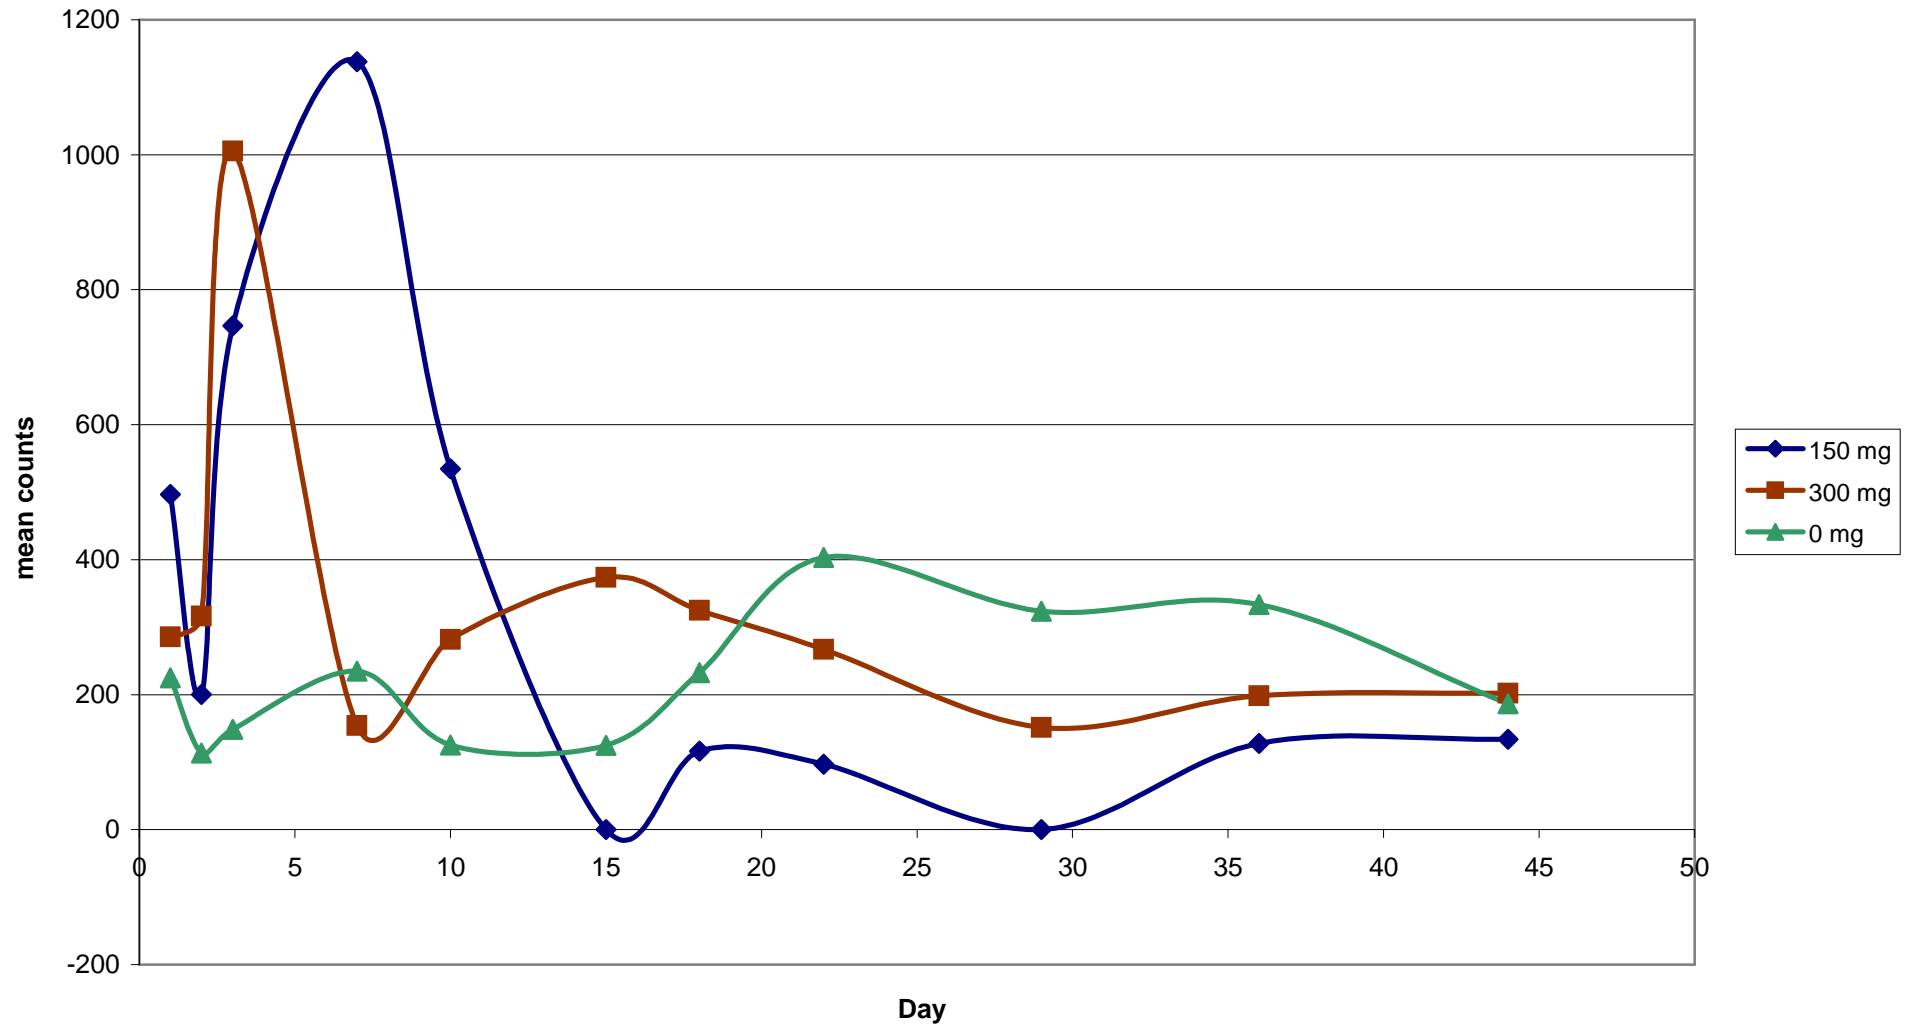



ID 10013

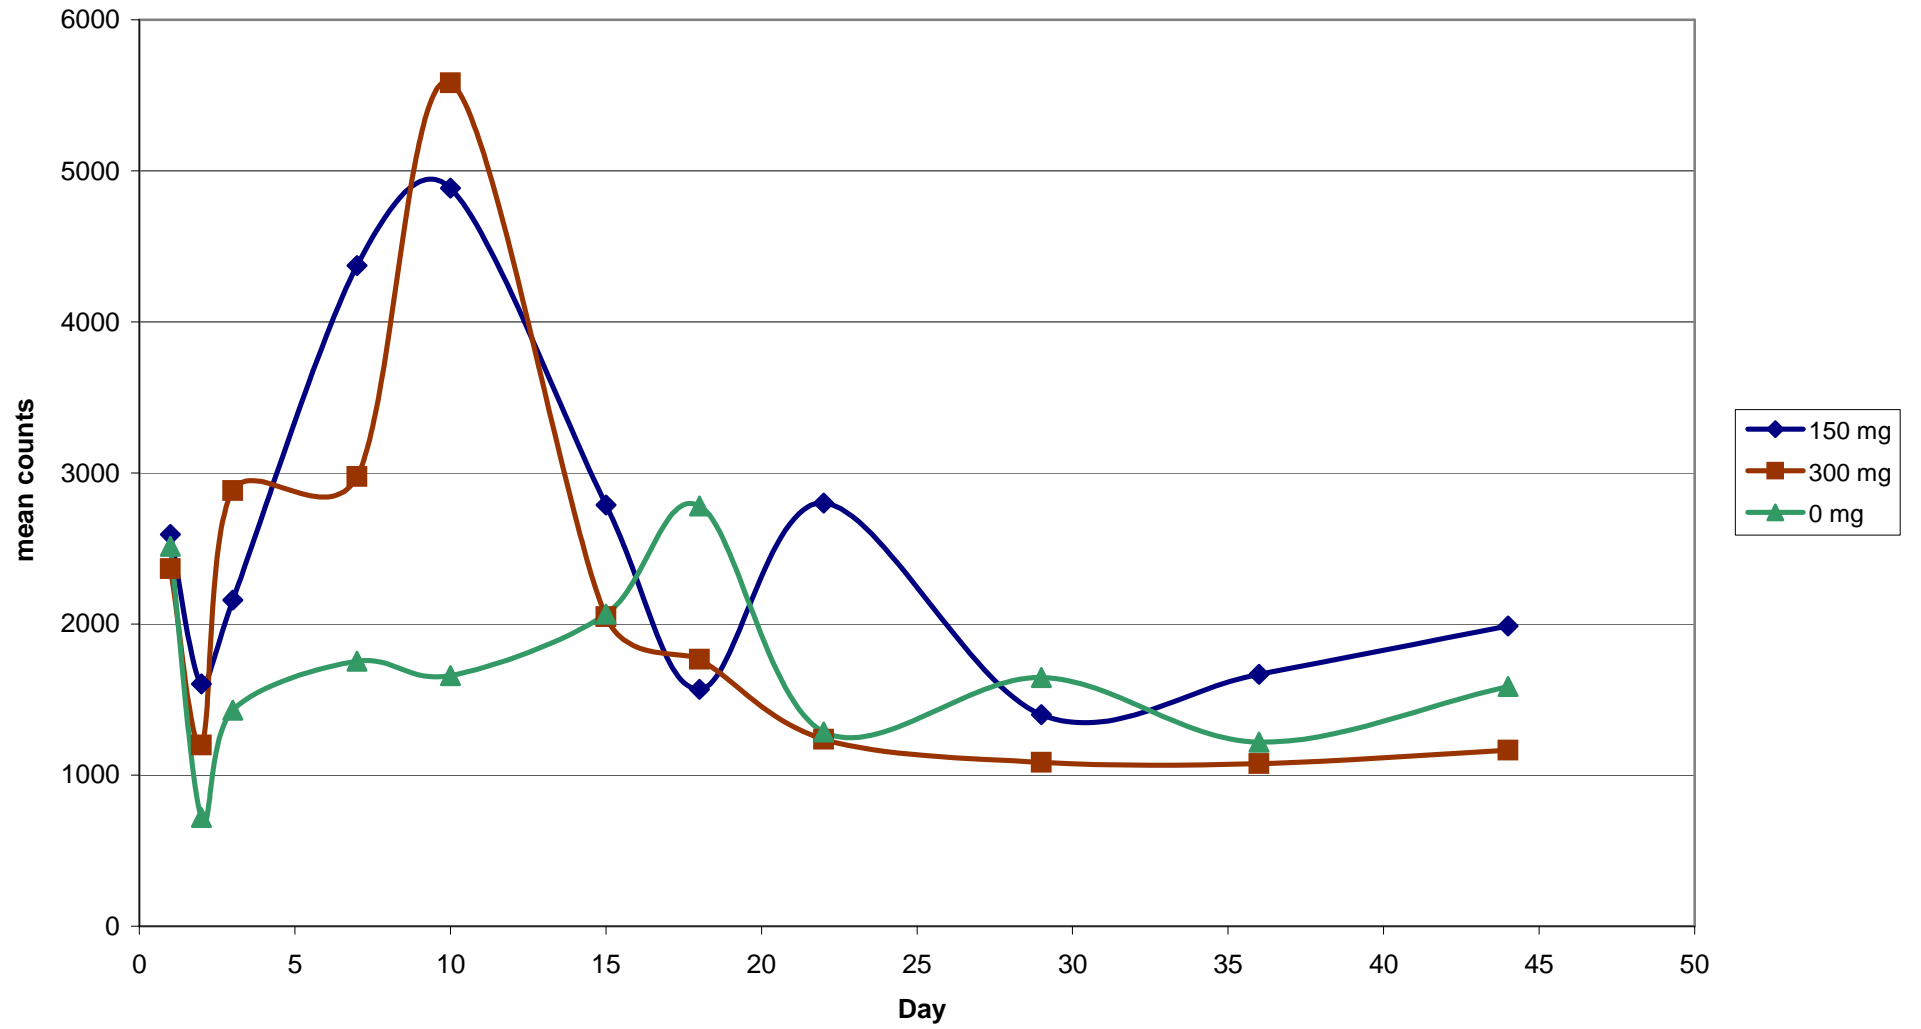

ID 9757

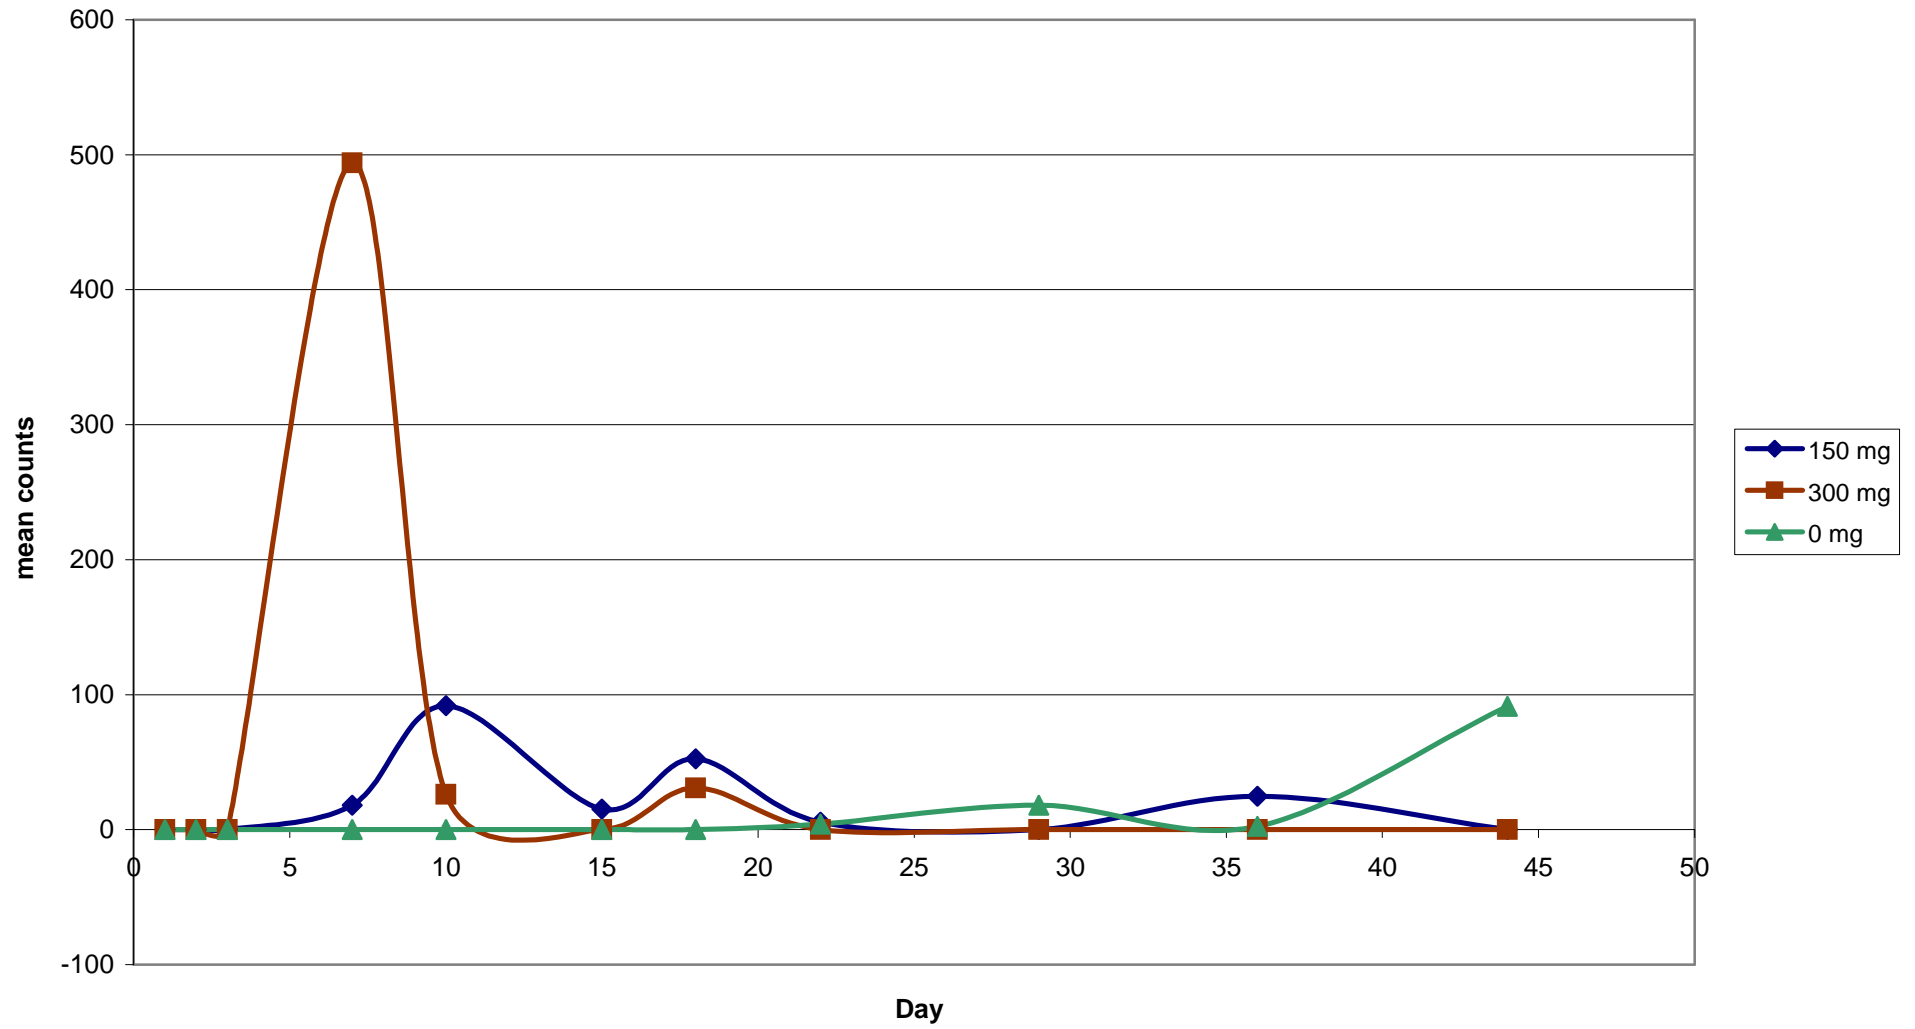

ID 9709

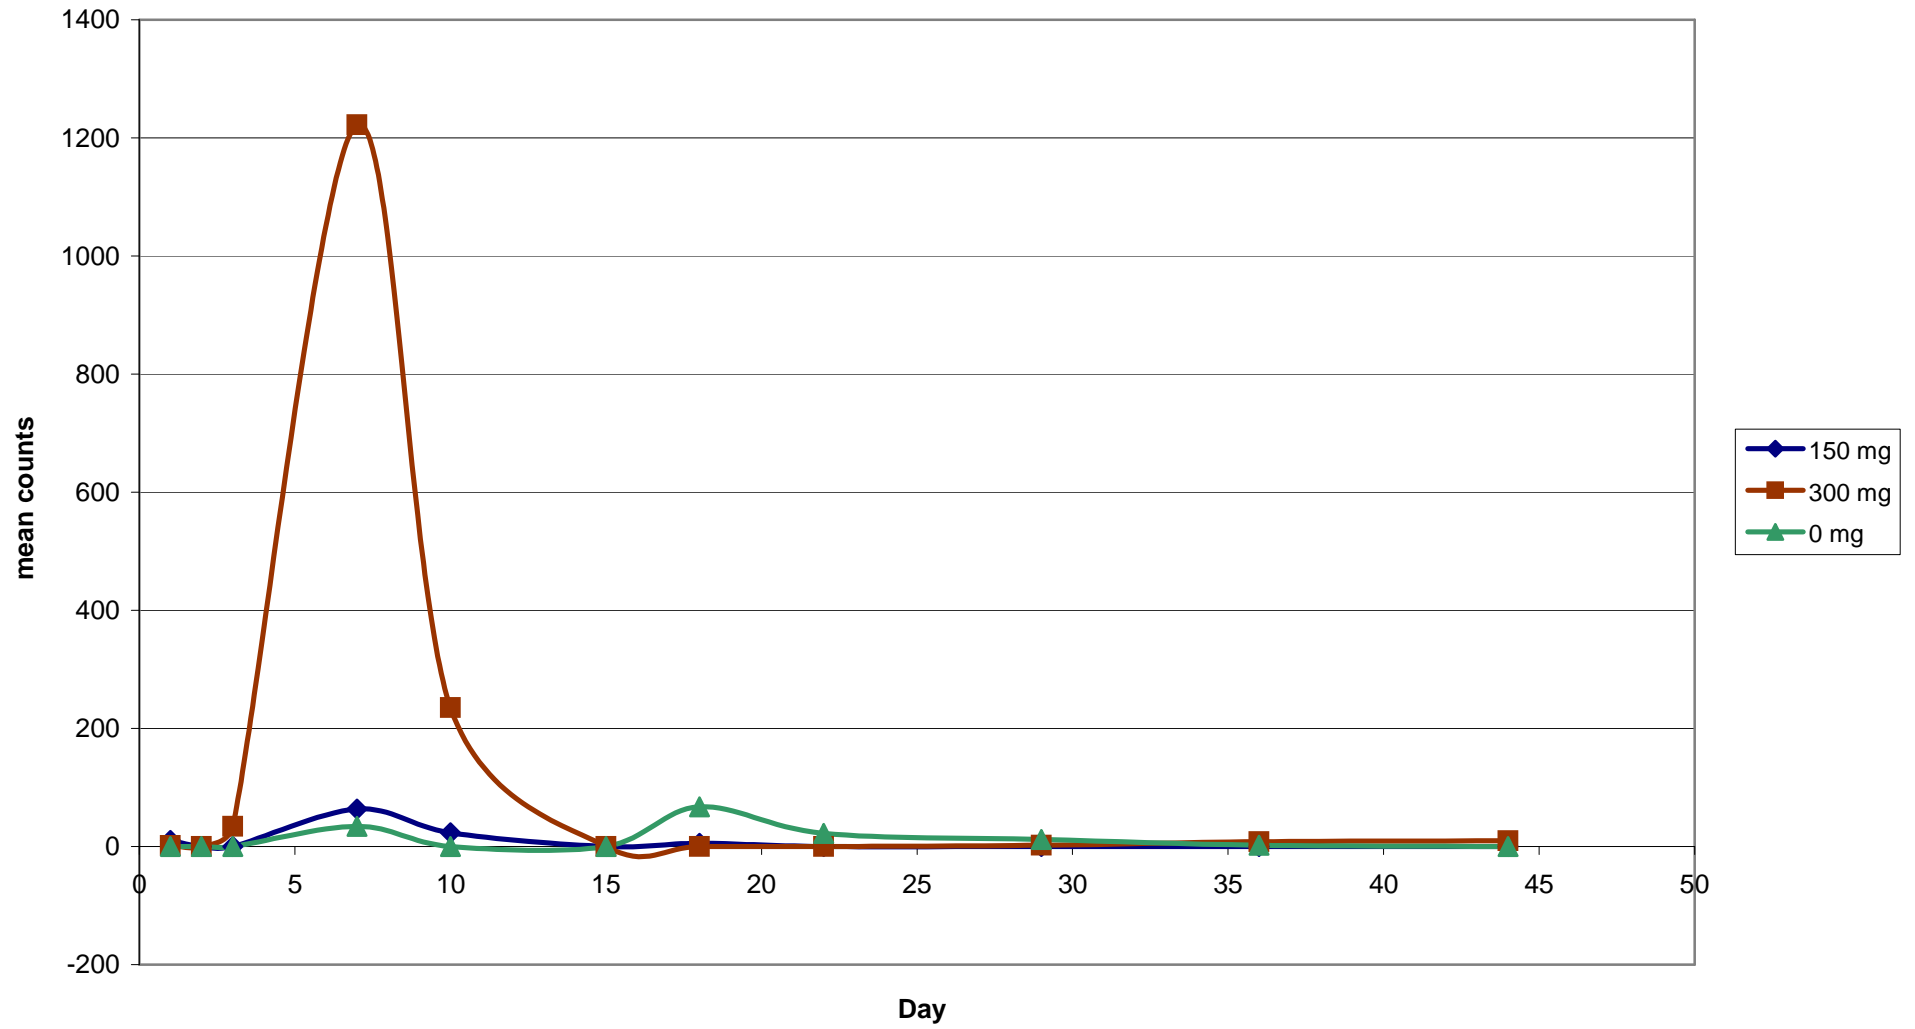

ID 9626

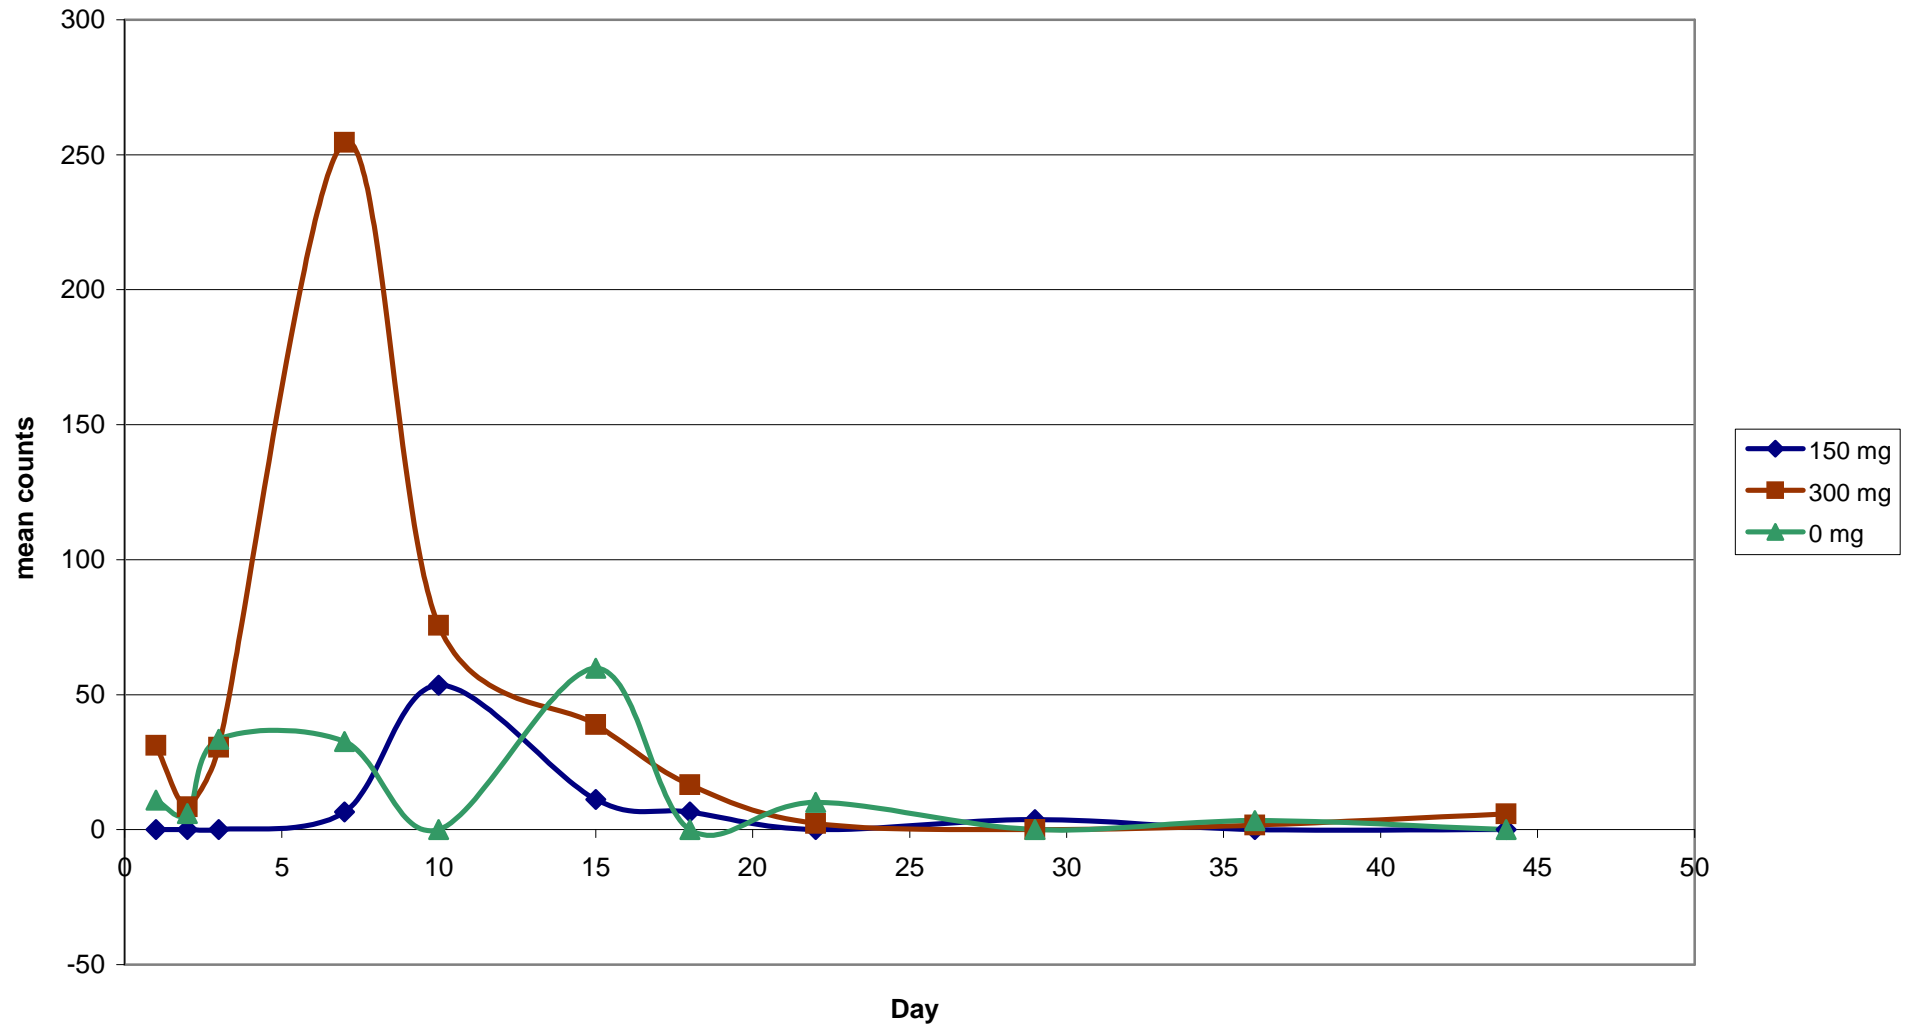

ID 9488

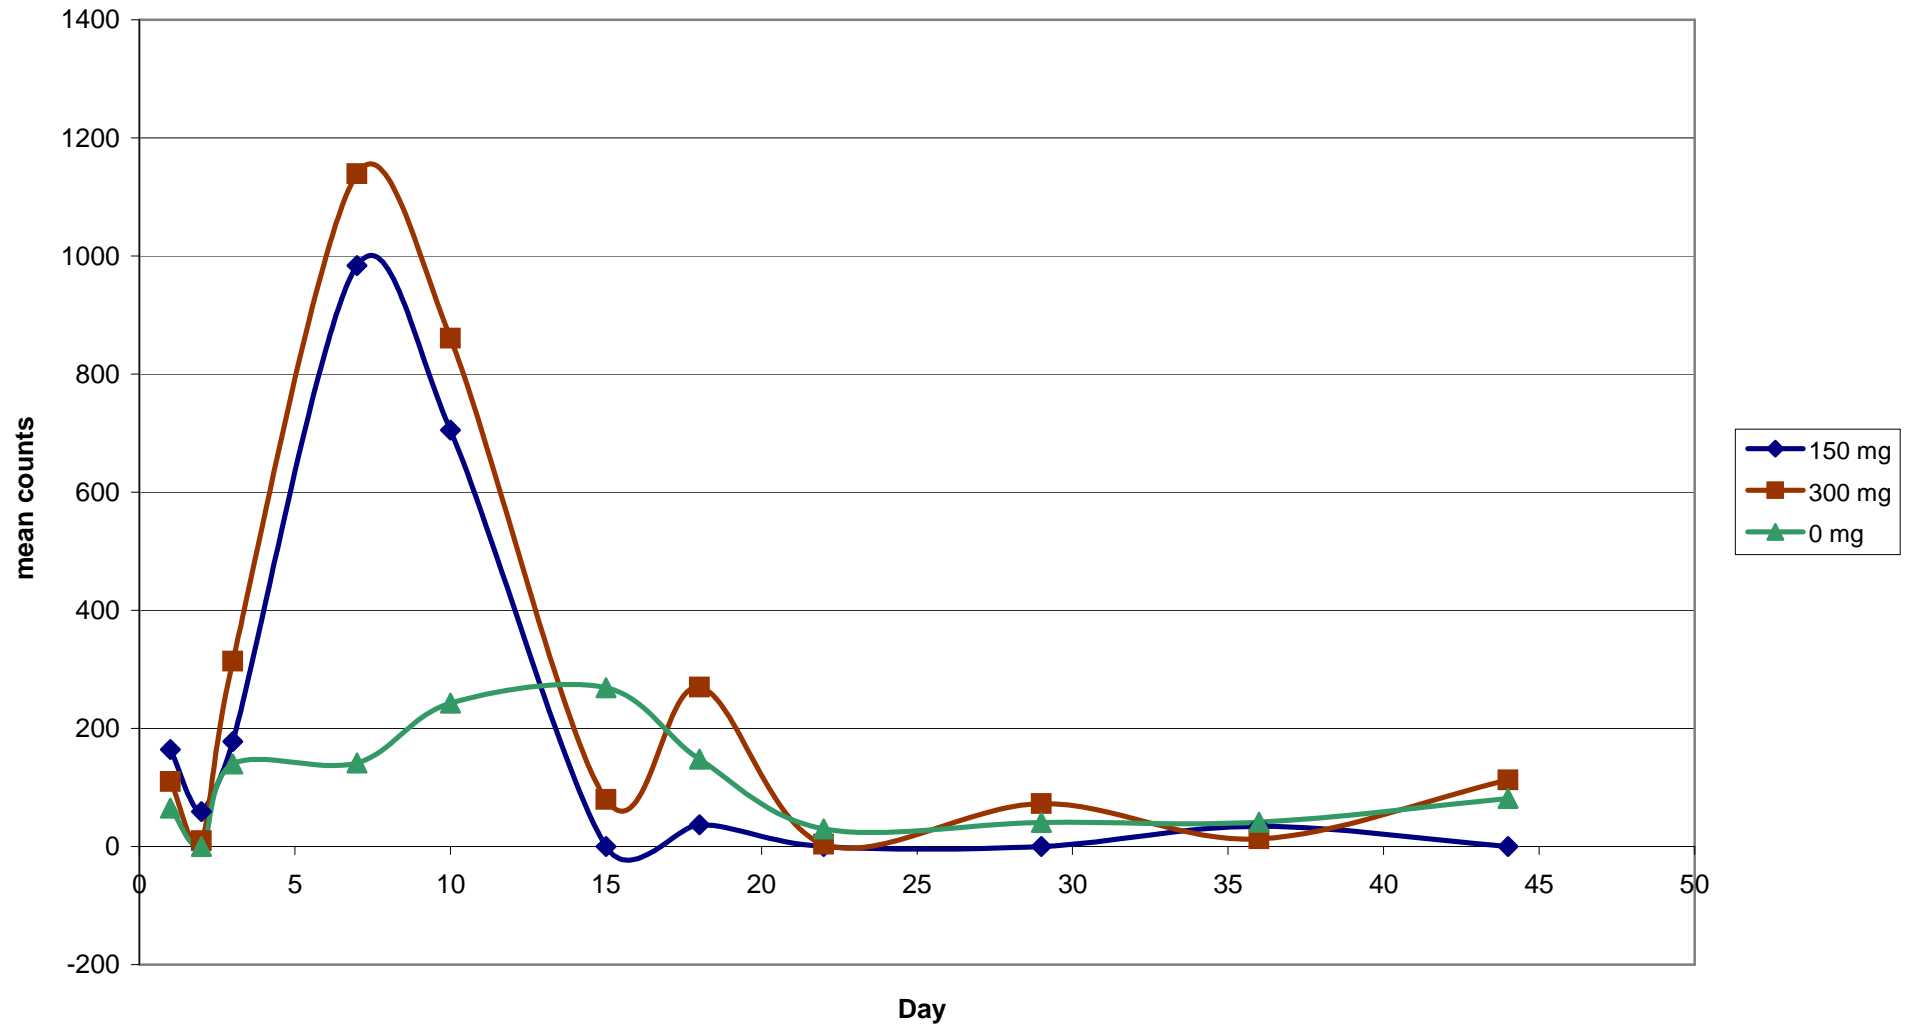

ID 8862

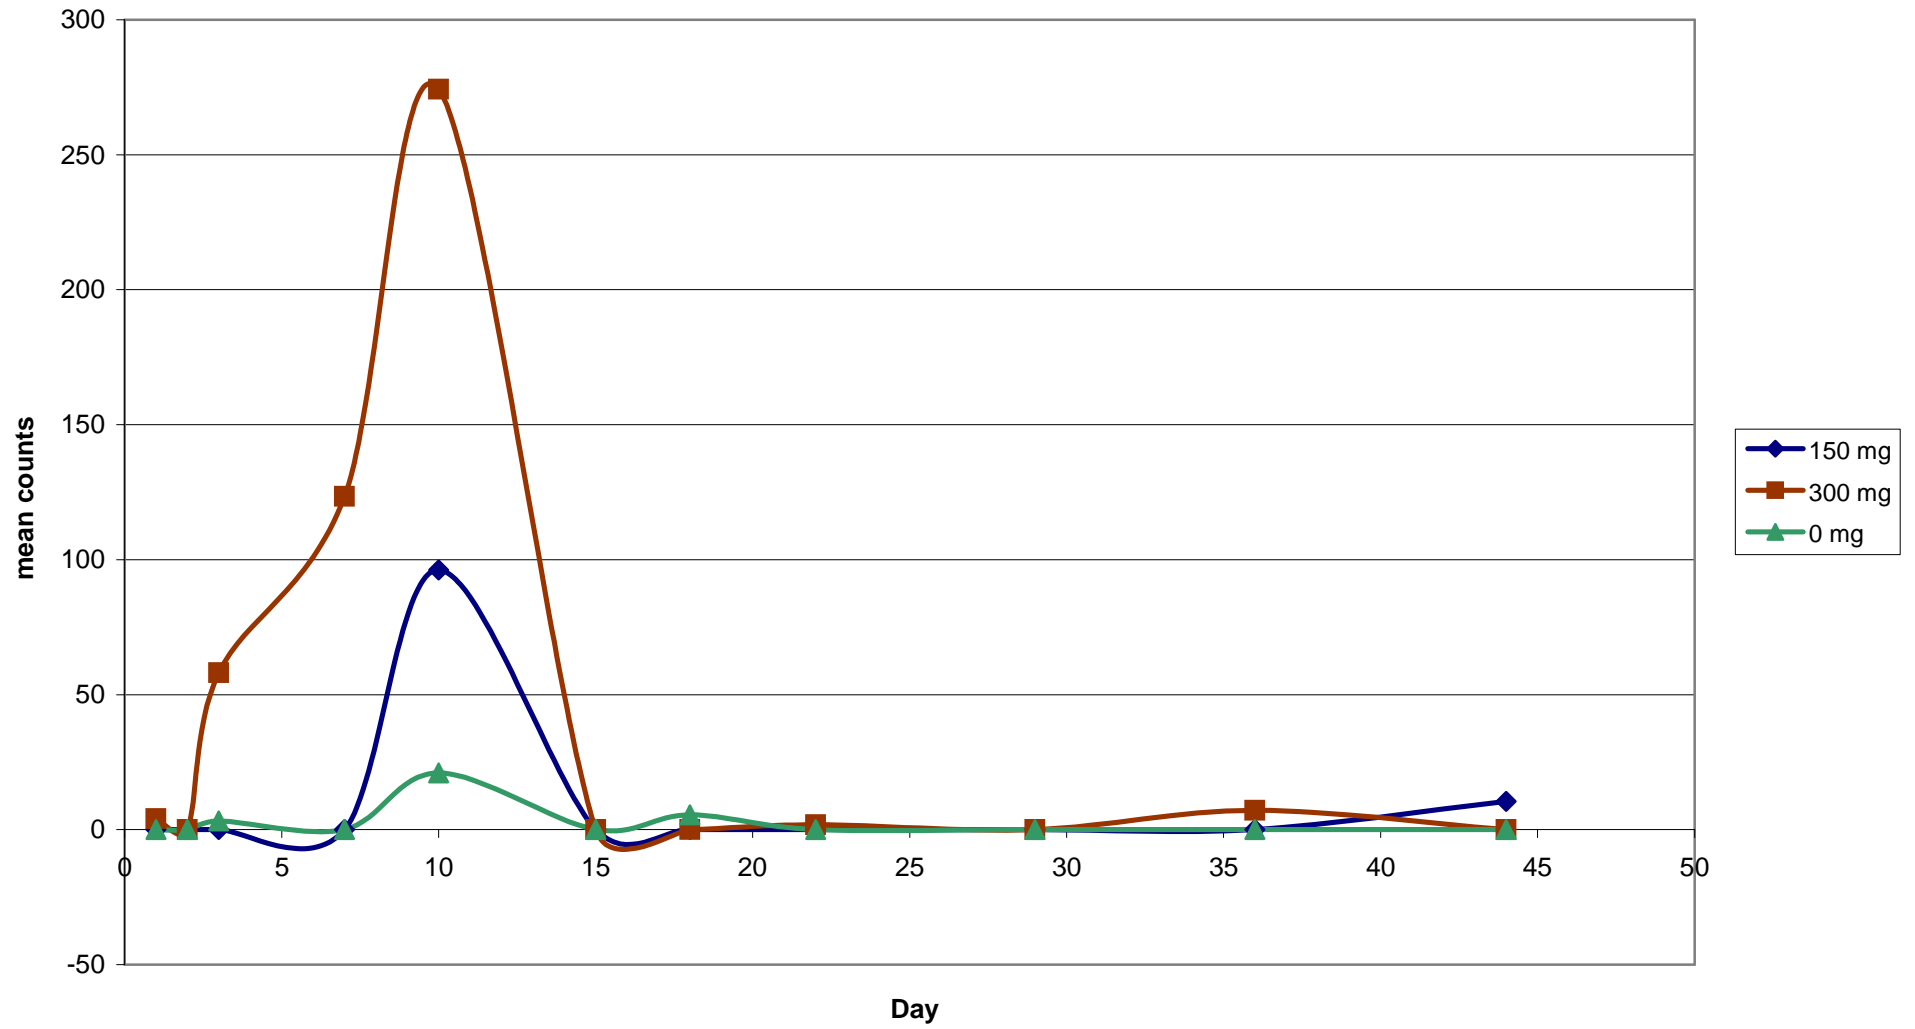

ID 8770

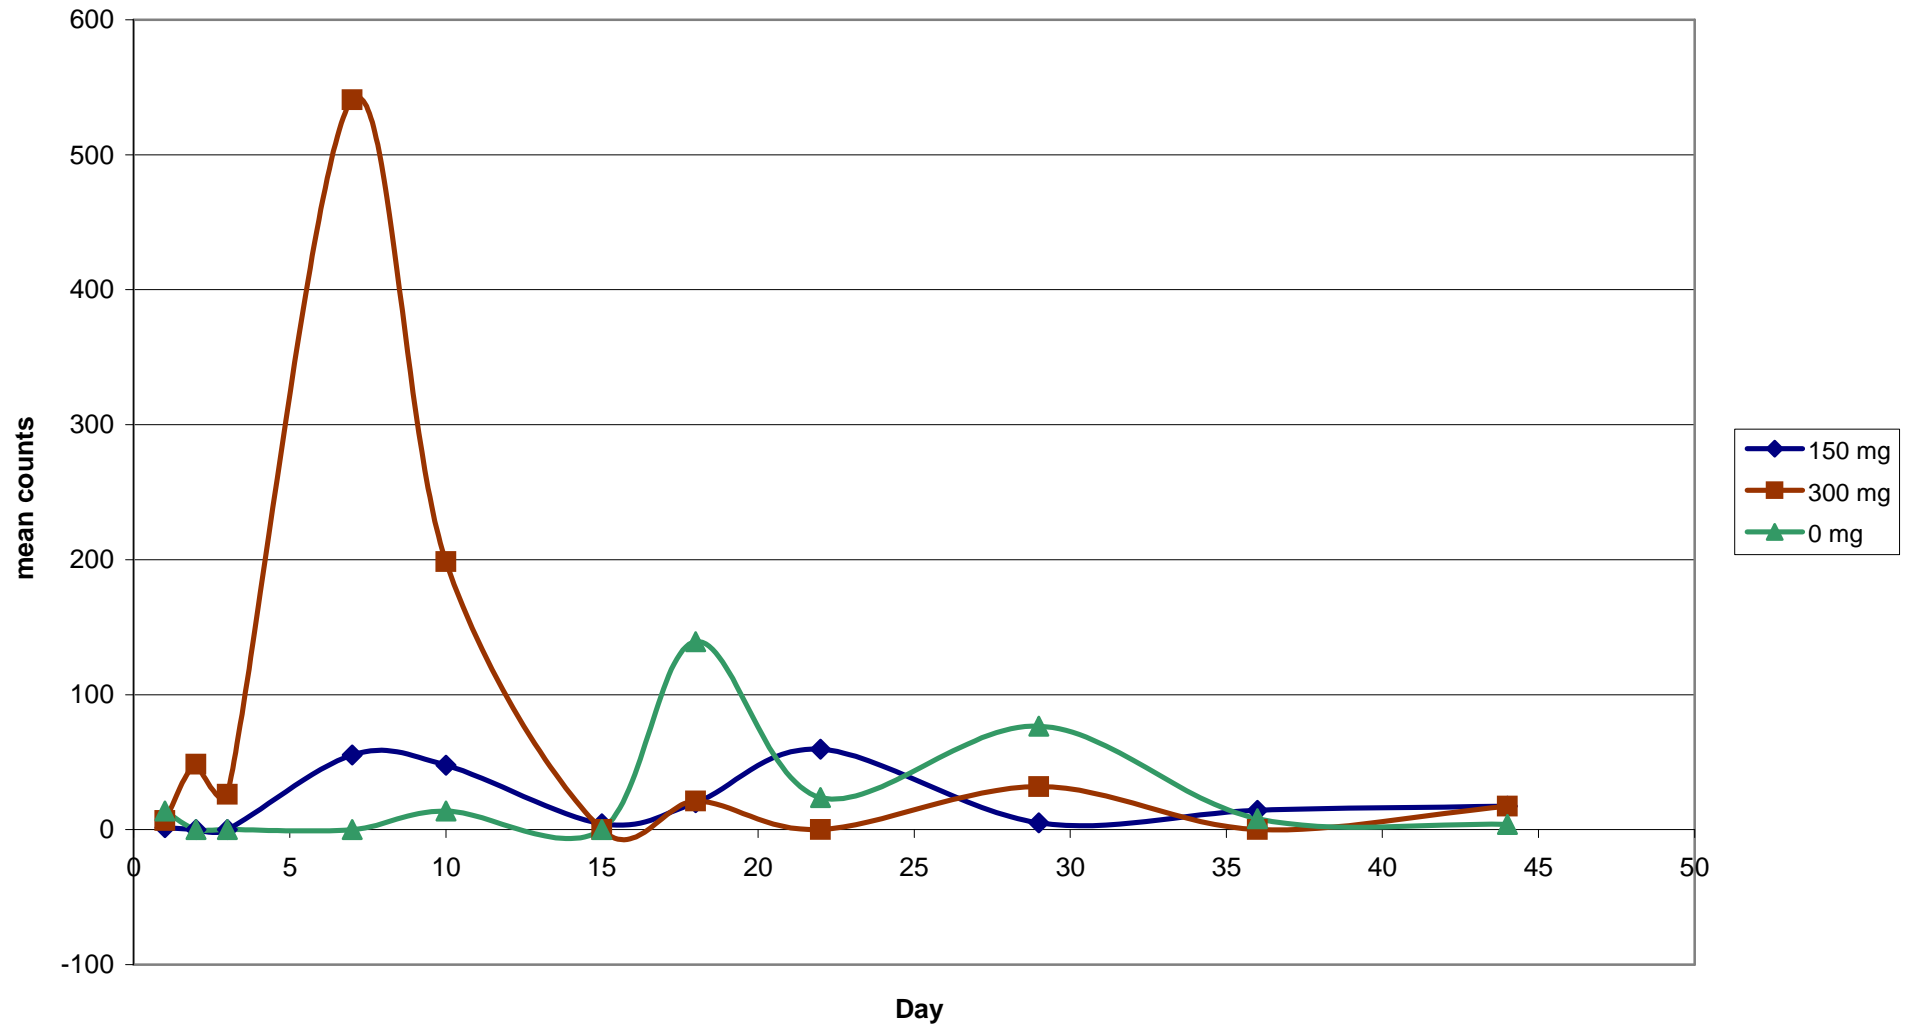

ID 8197

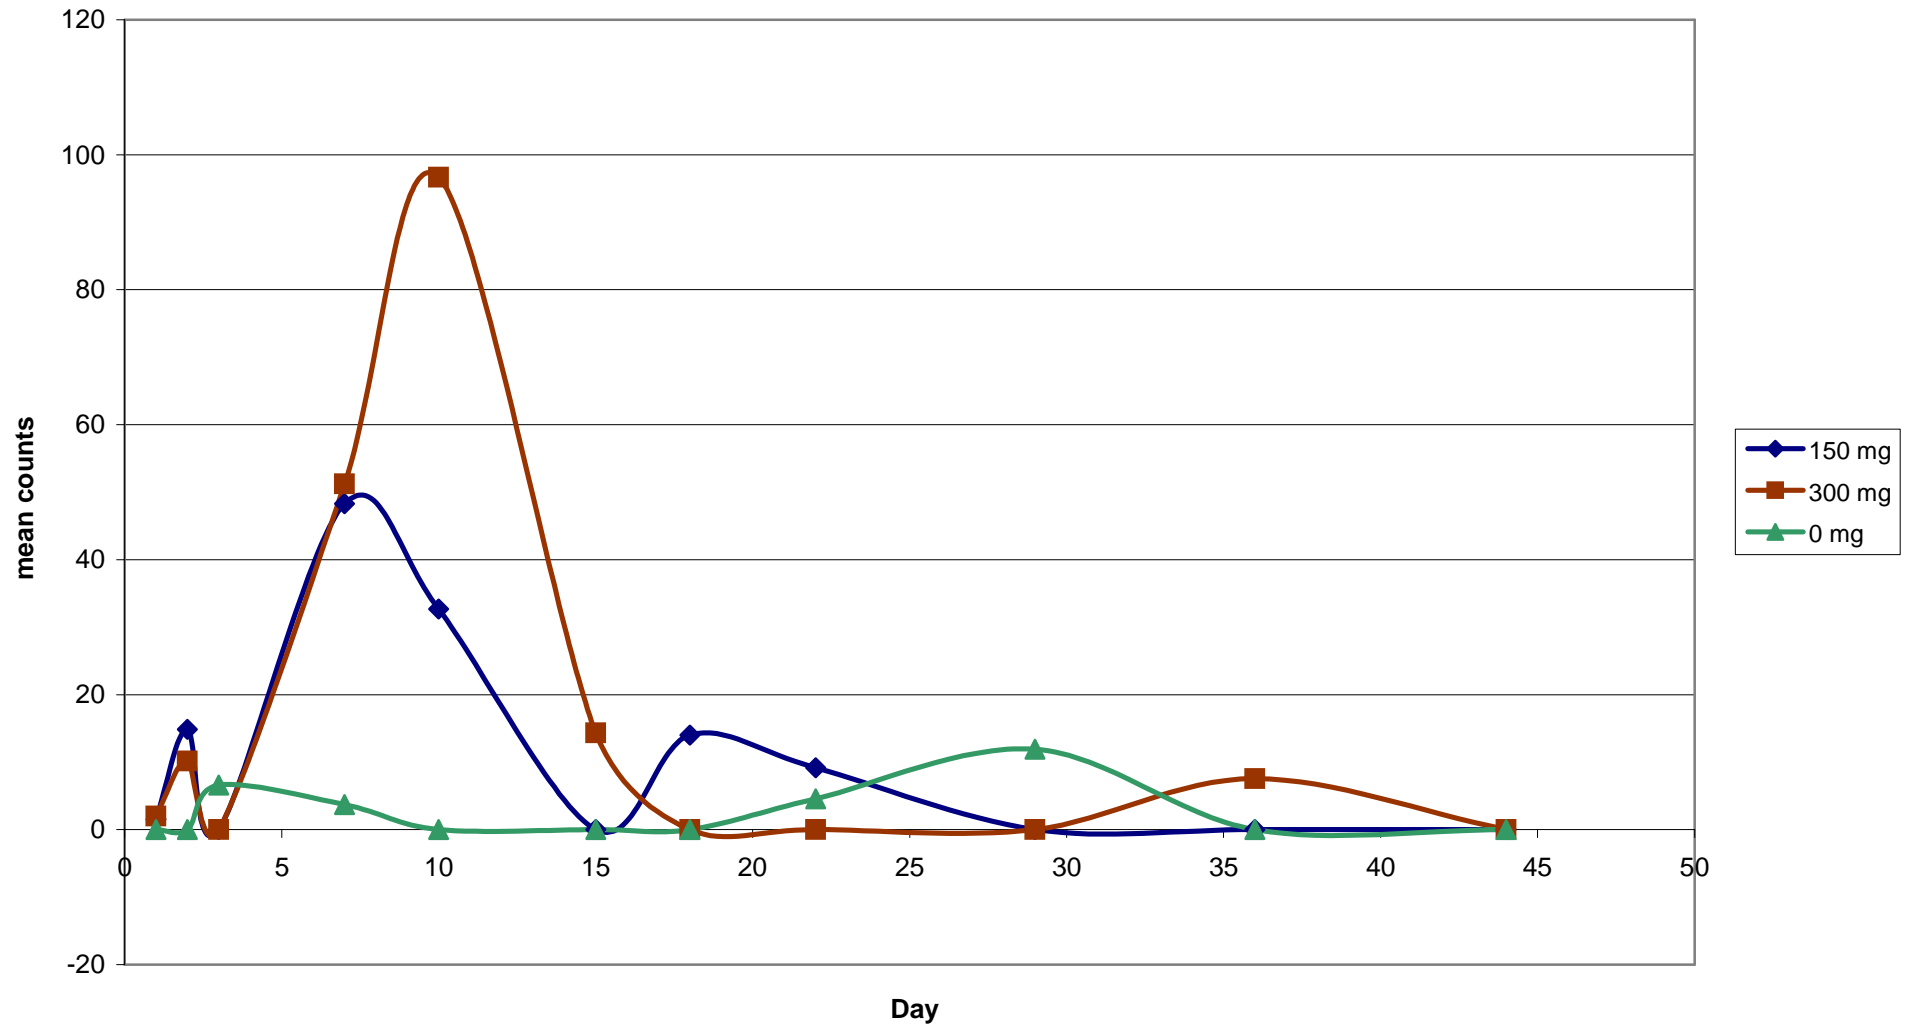



ID 8116

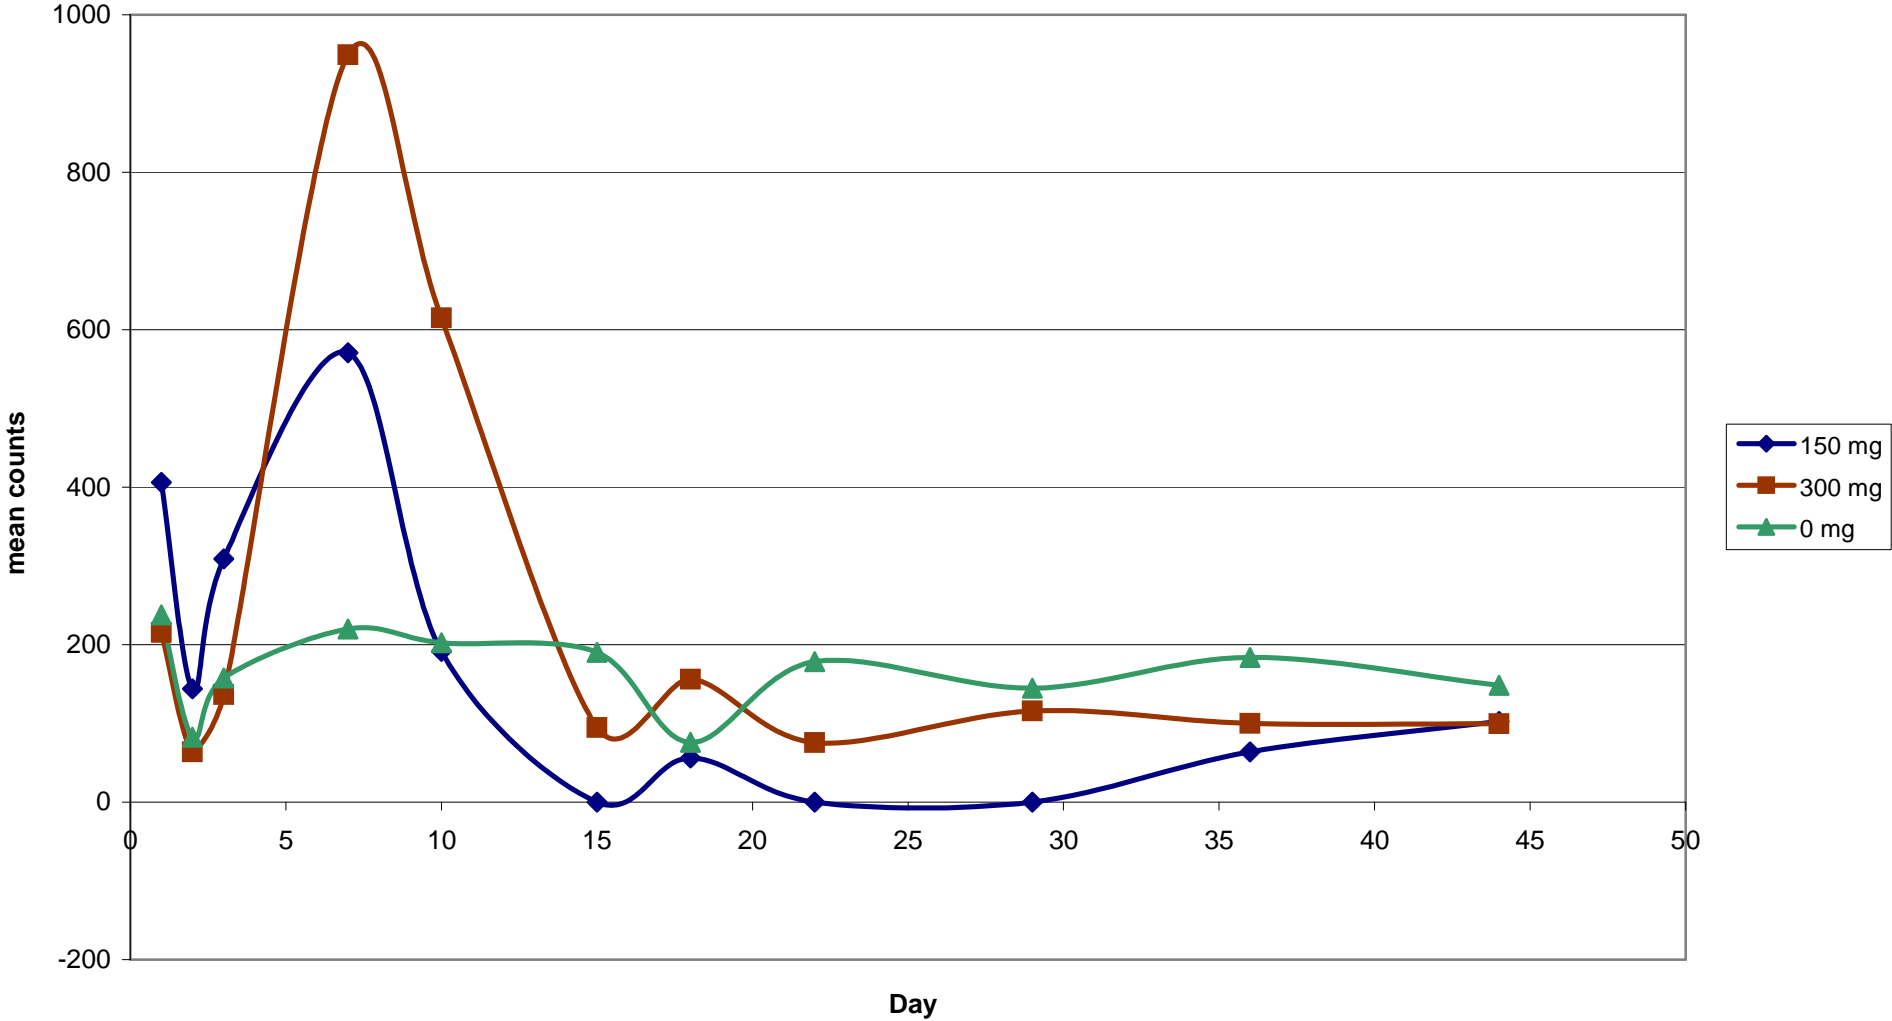

ID 8056

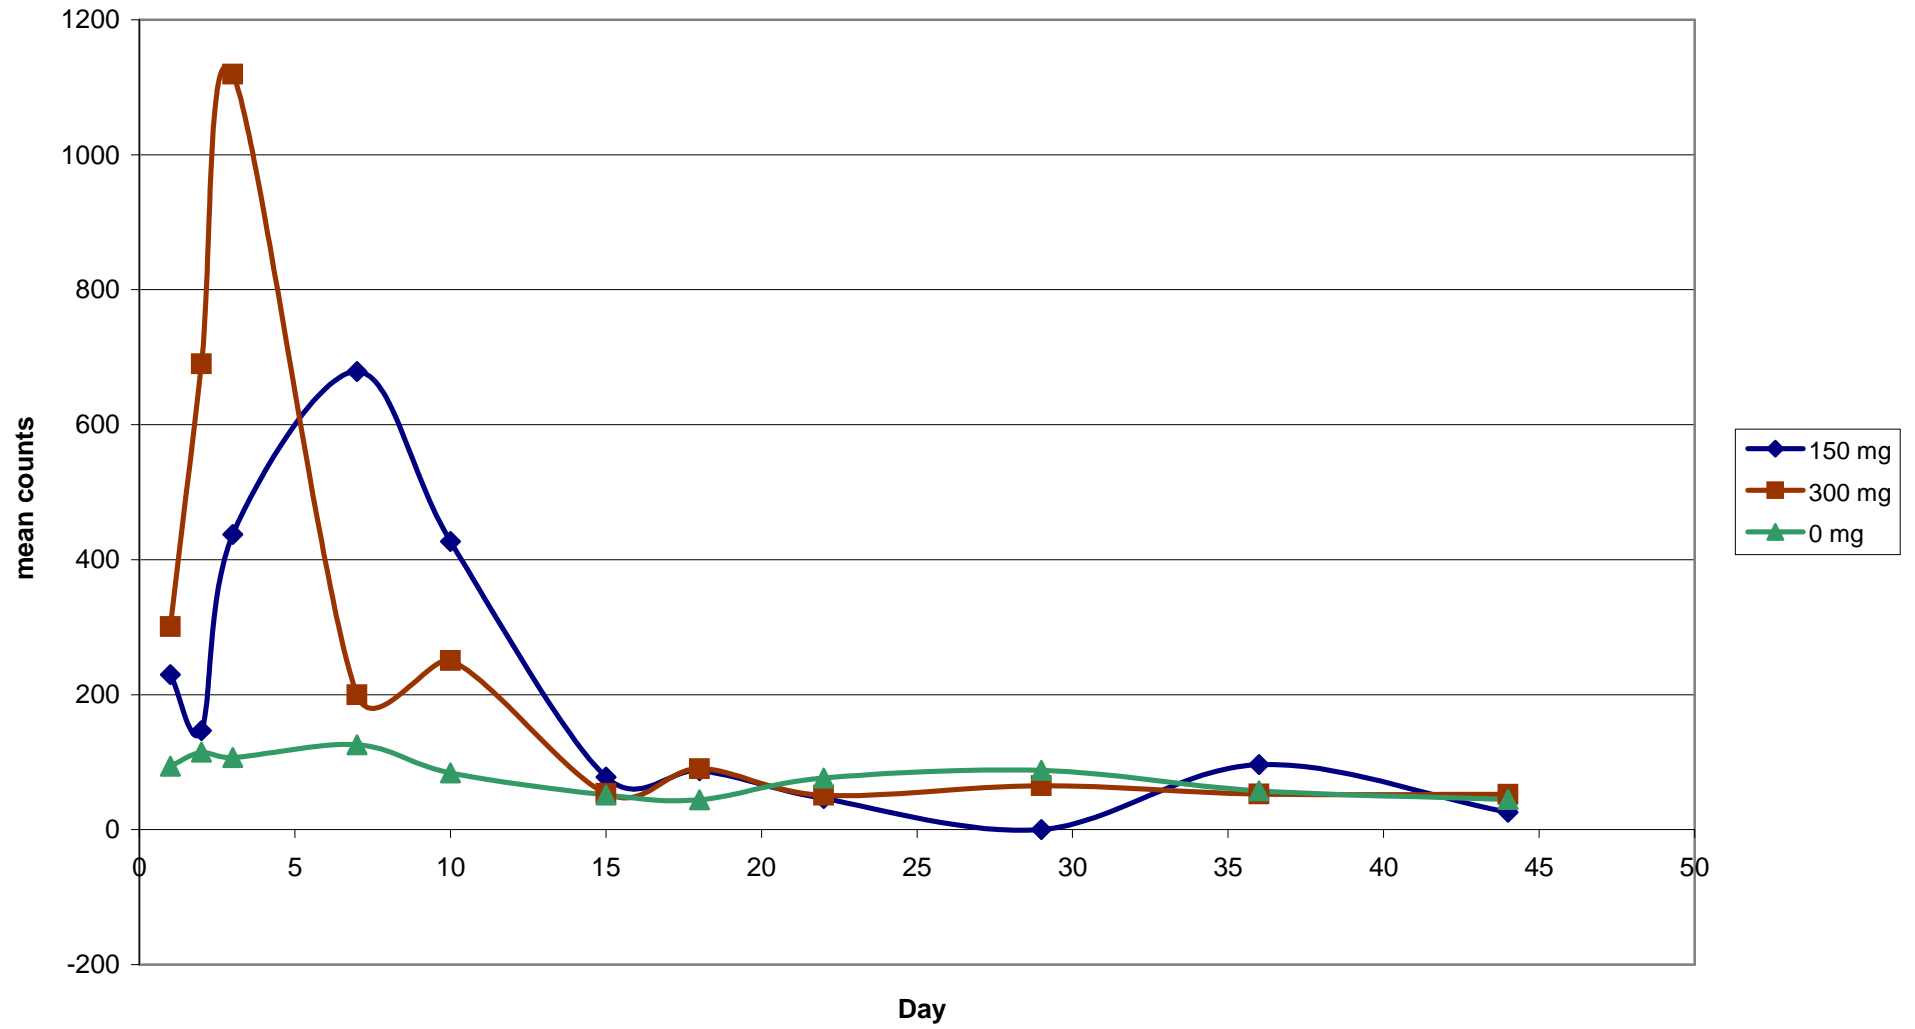

ID 7962

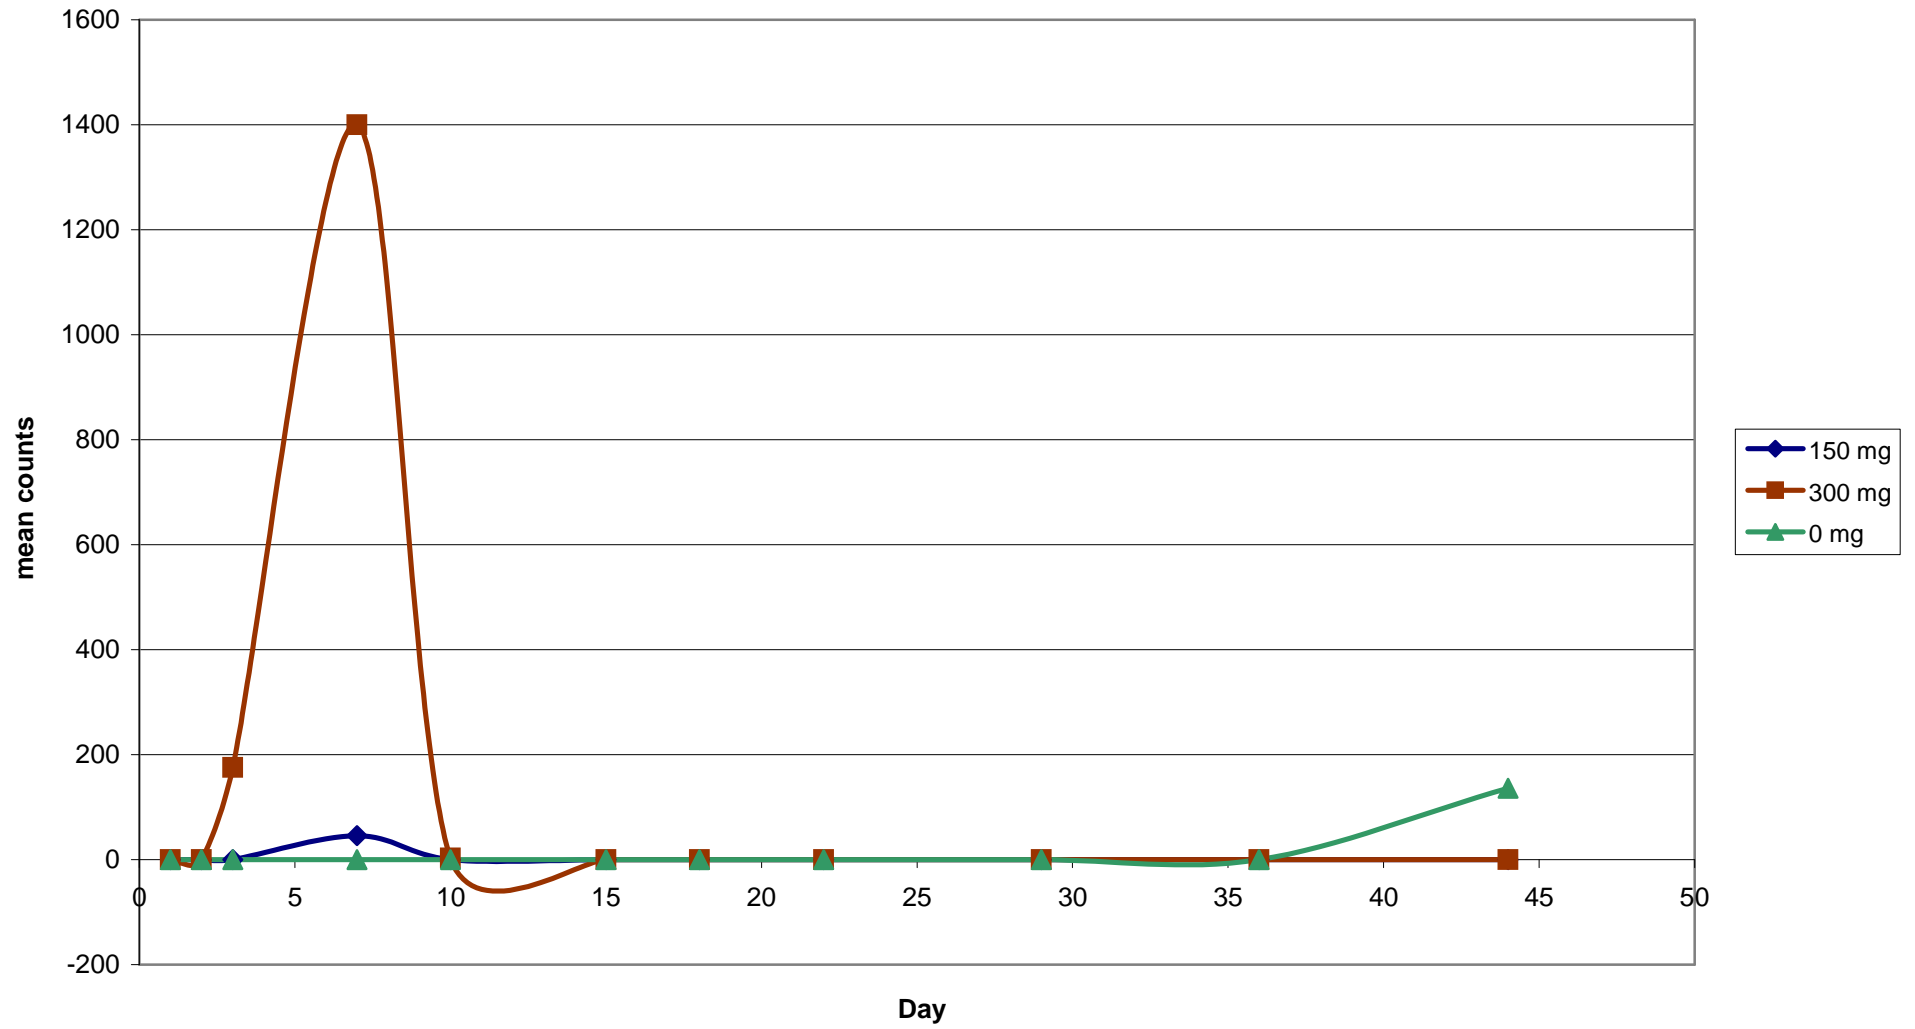

ID 7758

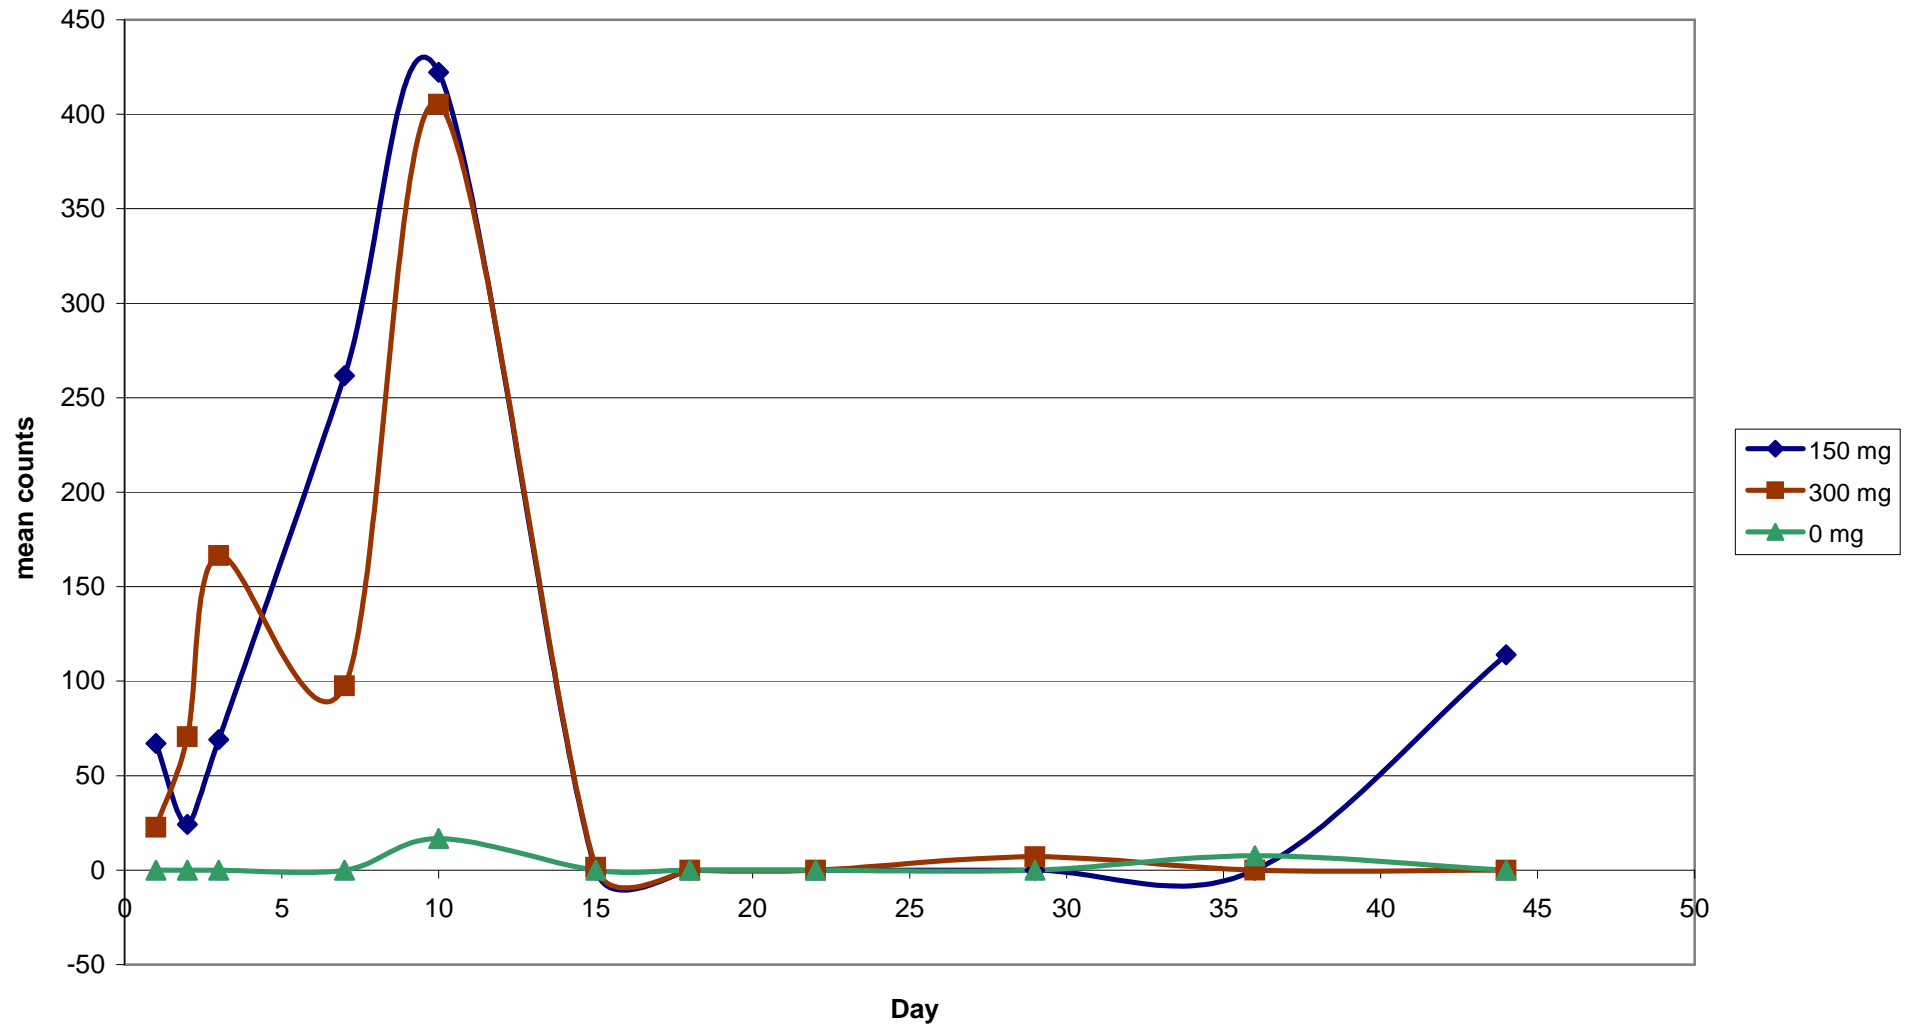

ID 7658

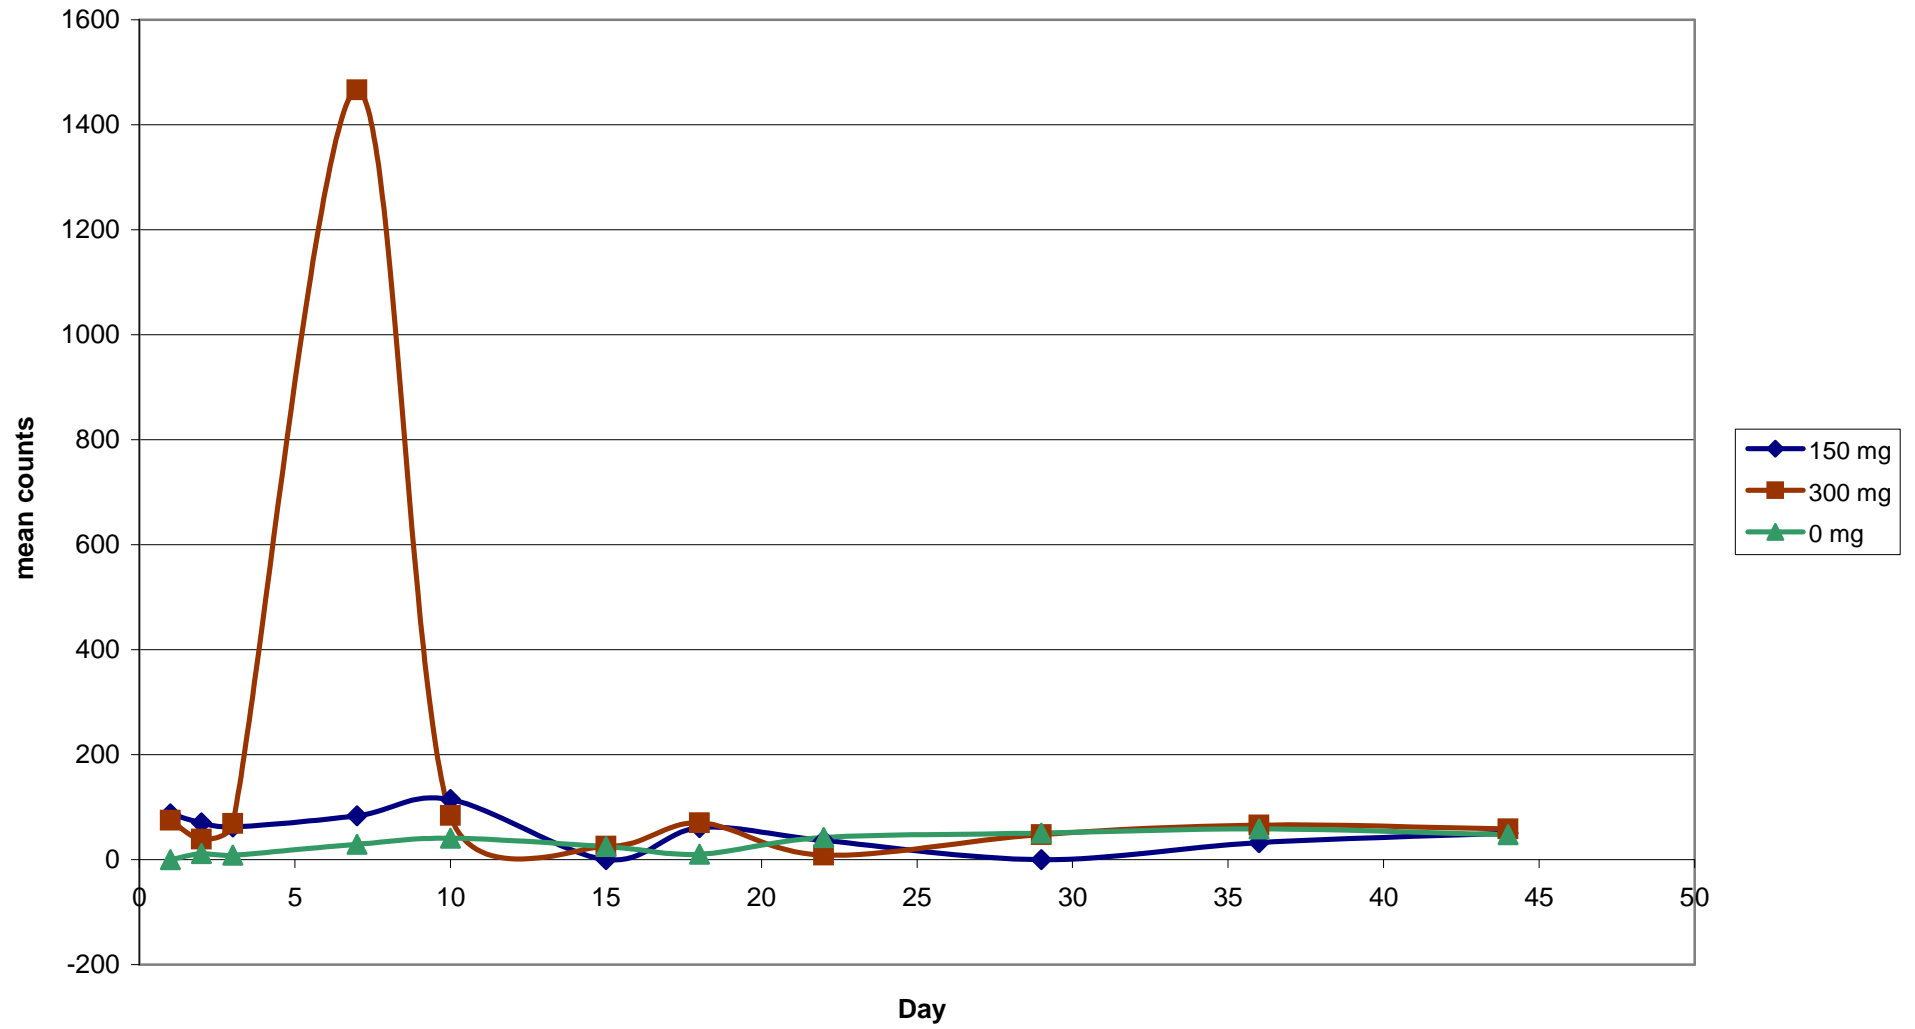

ID 7457

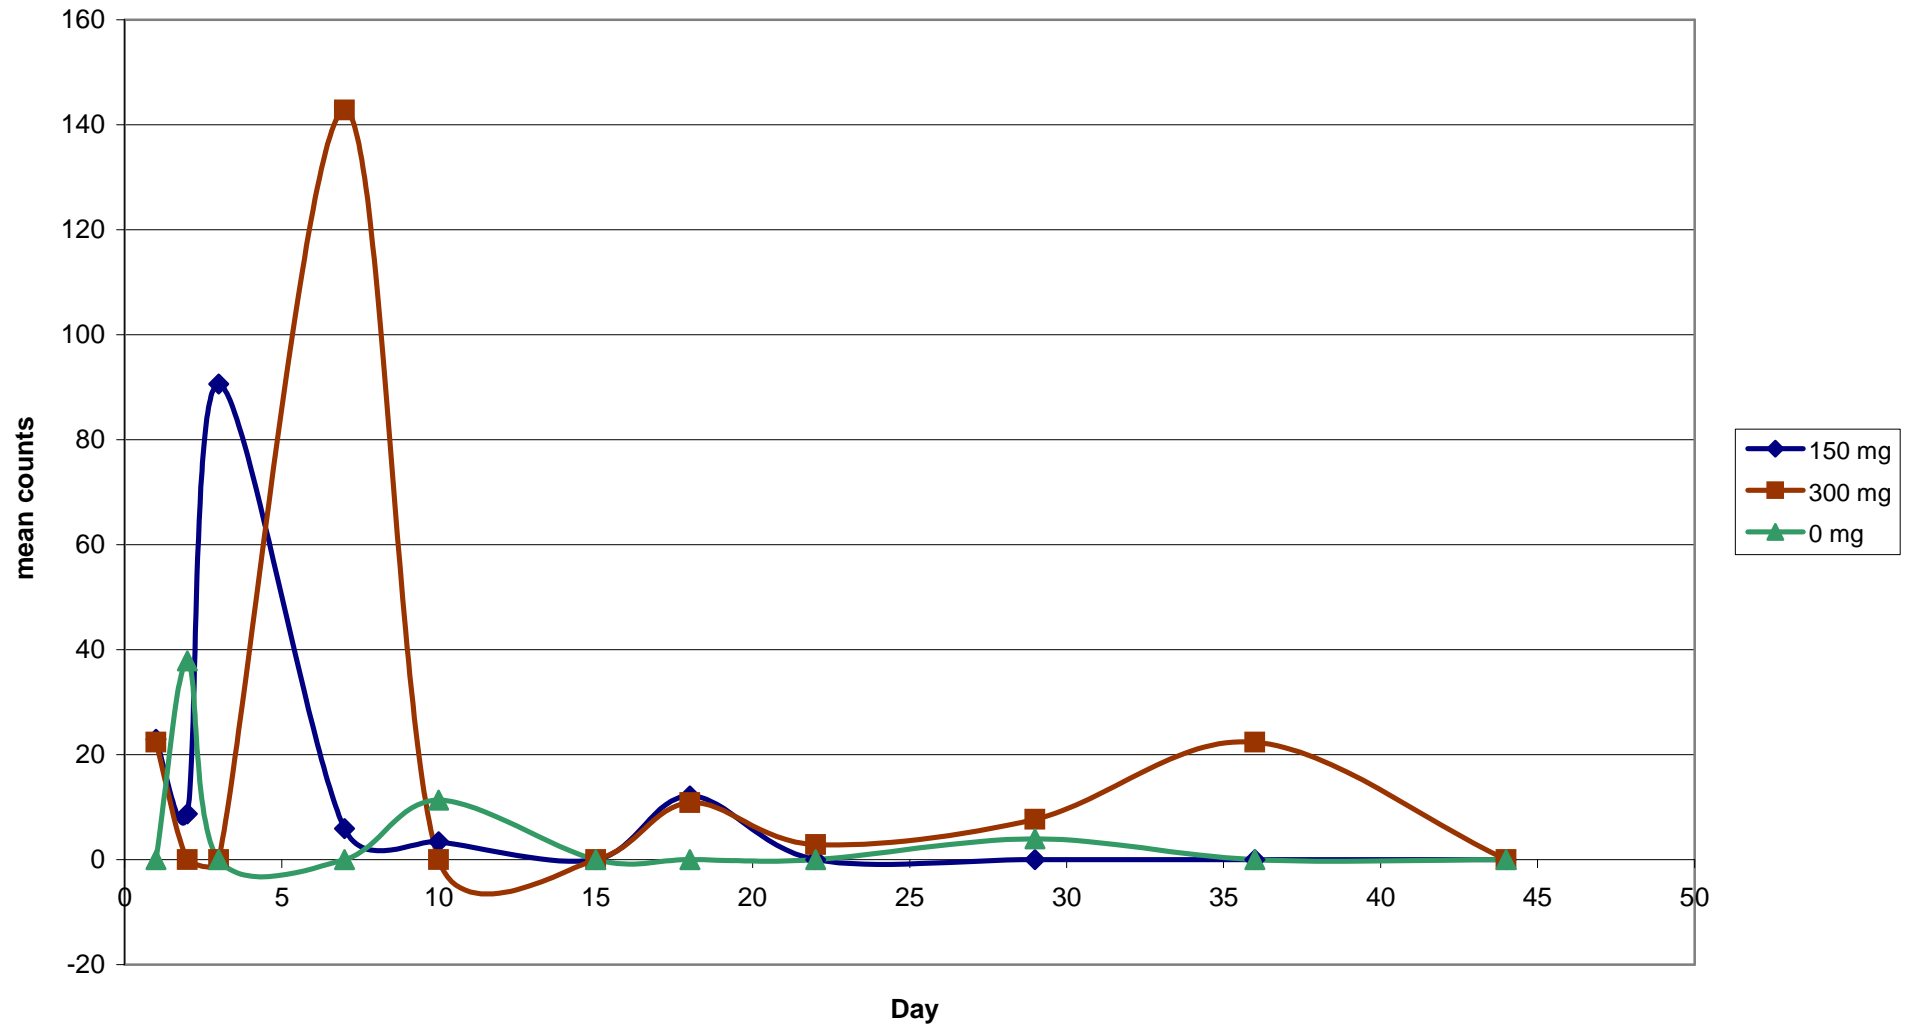

ID 7436

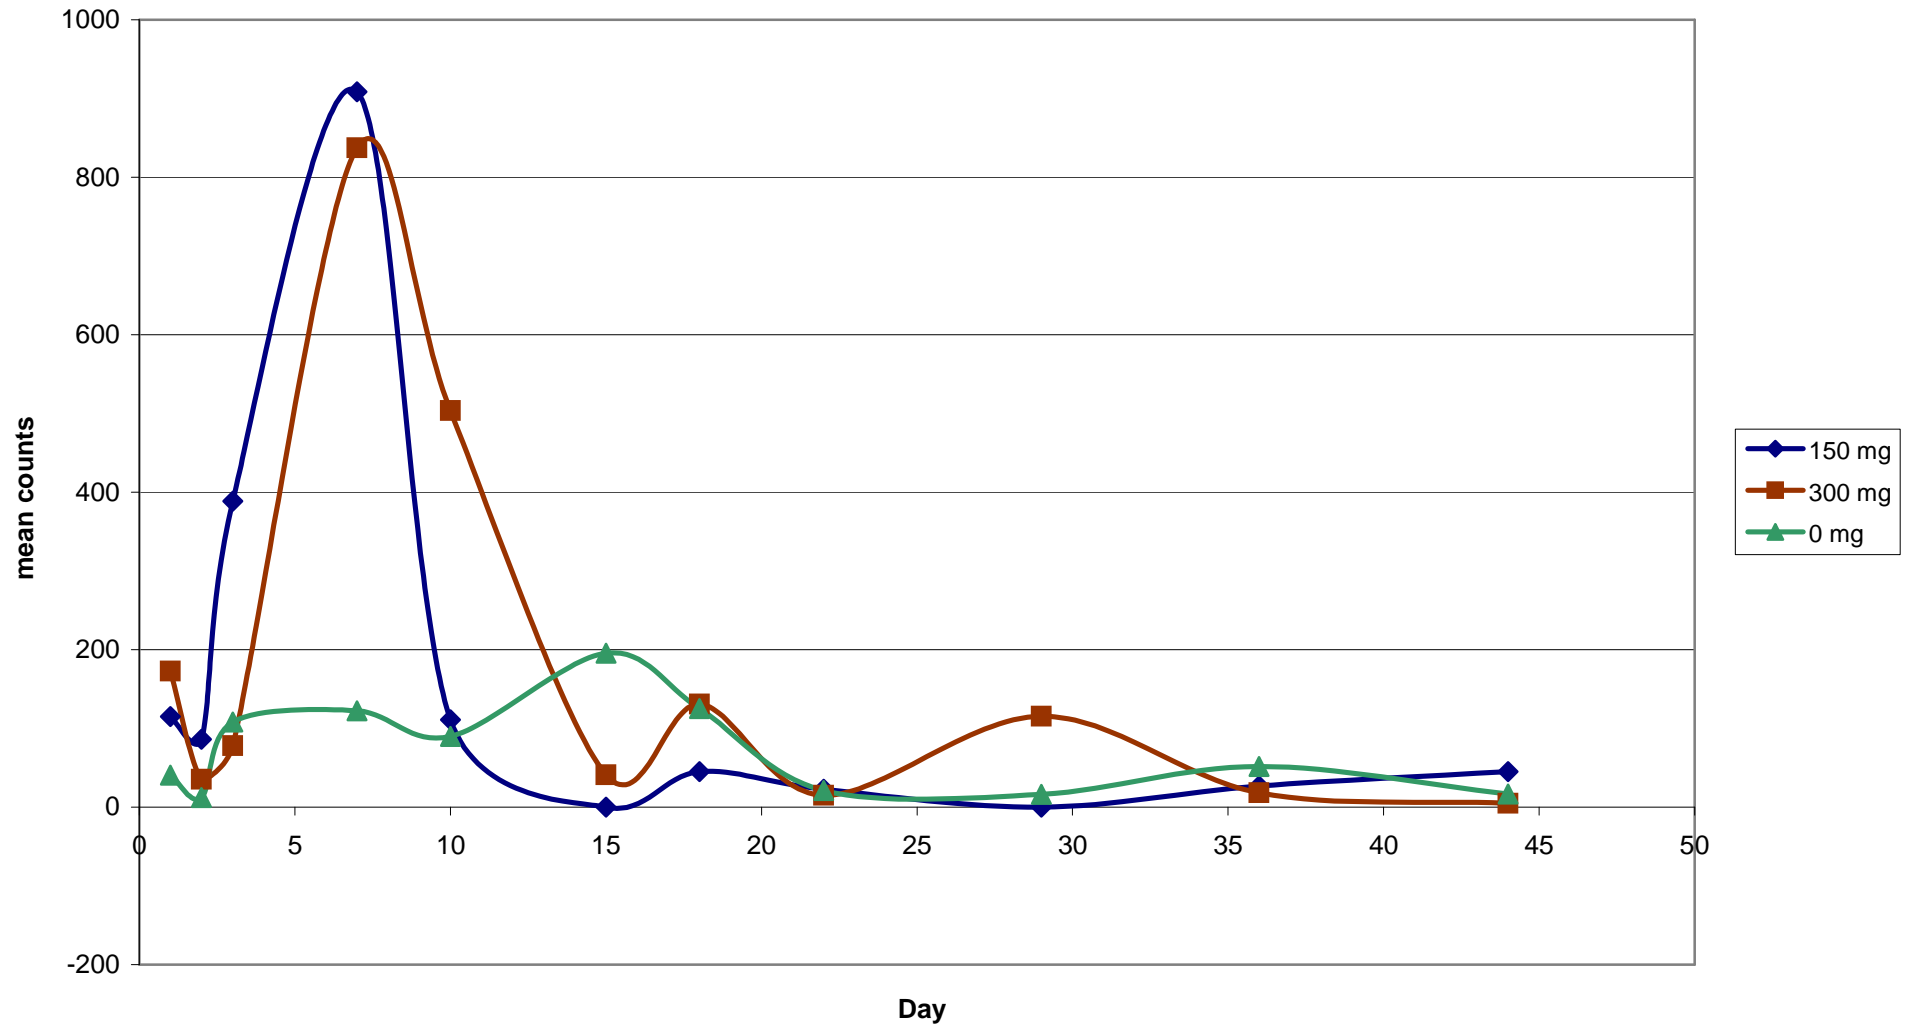

ID 7320

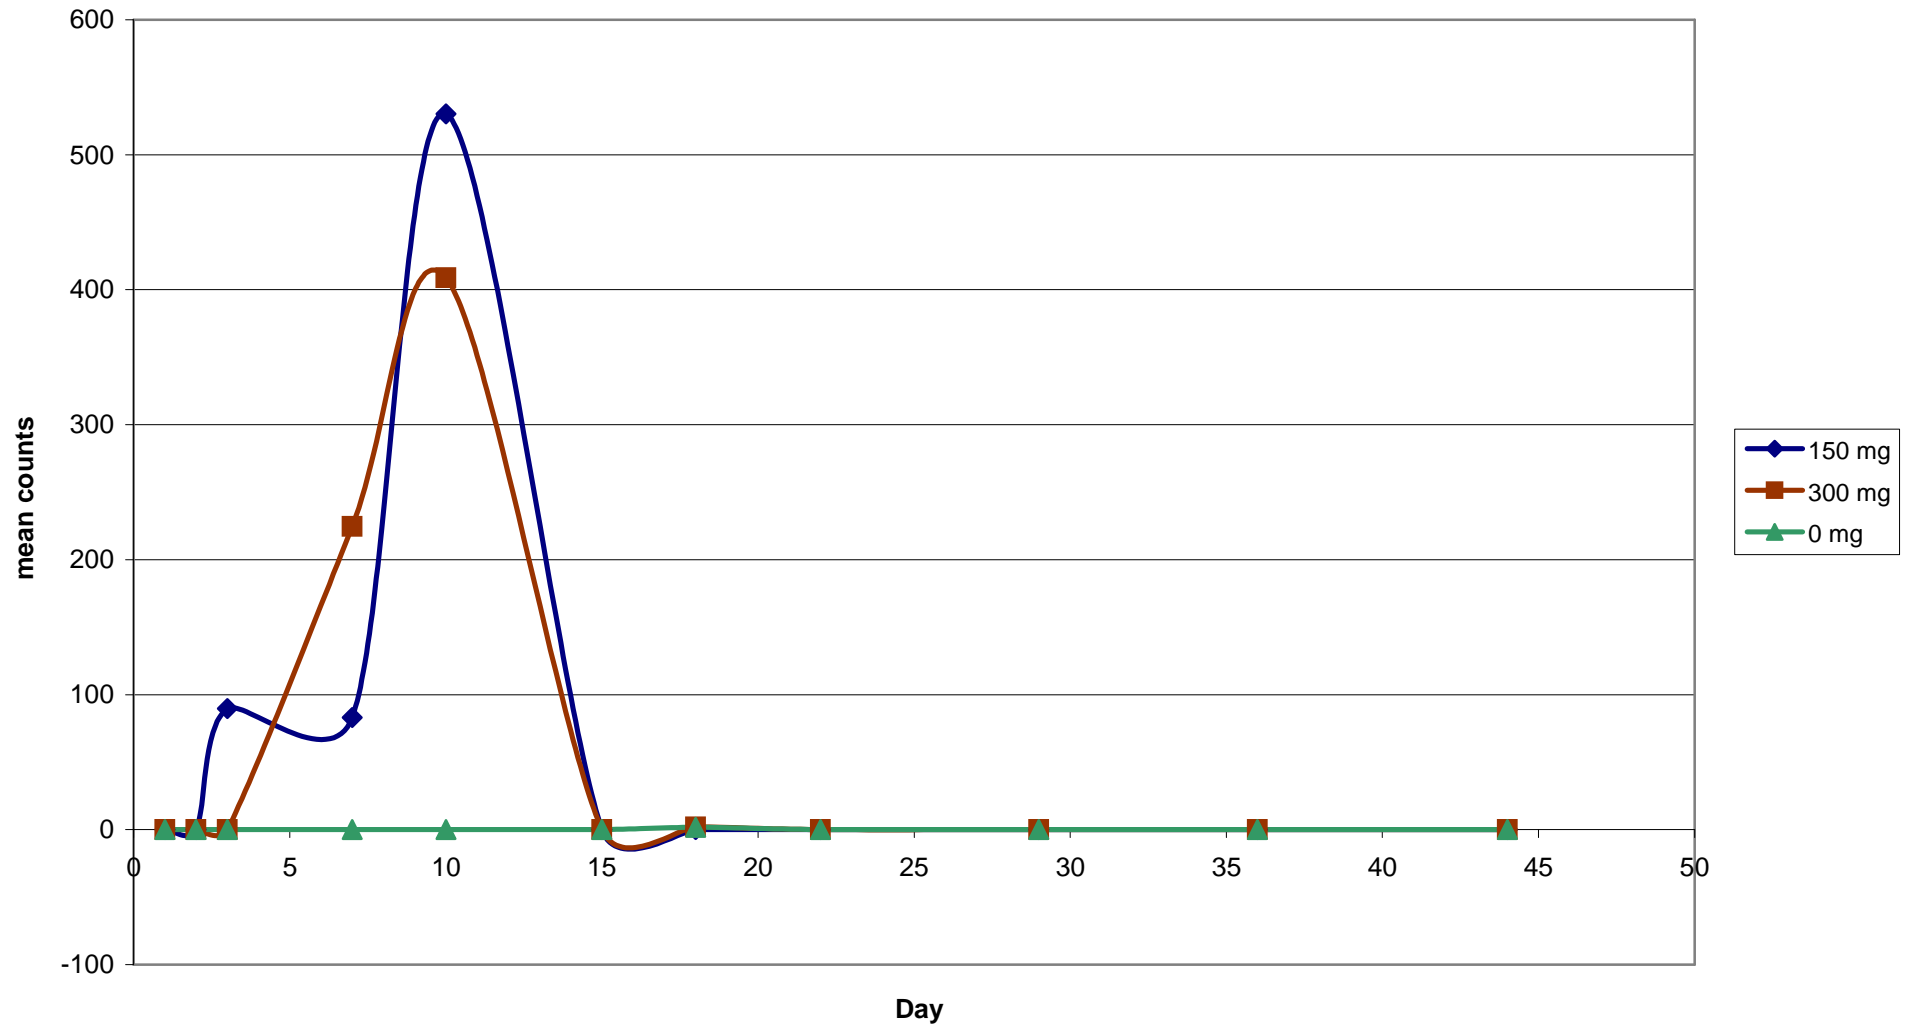



ID 7035

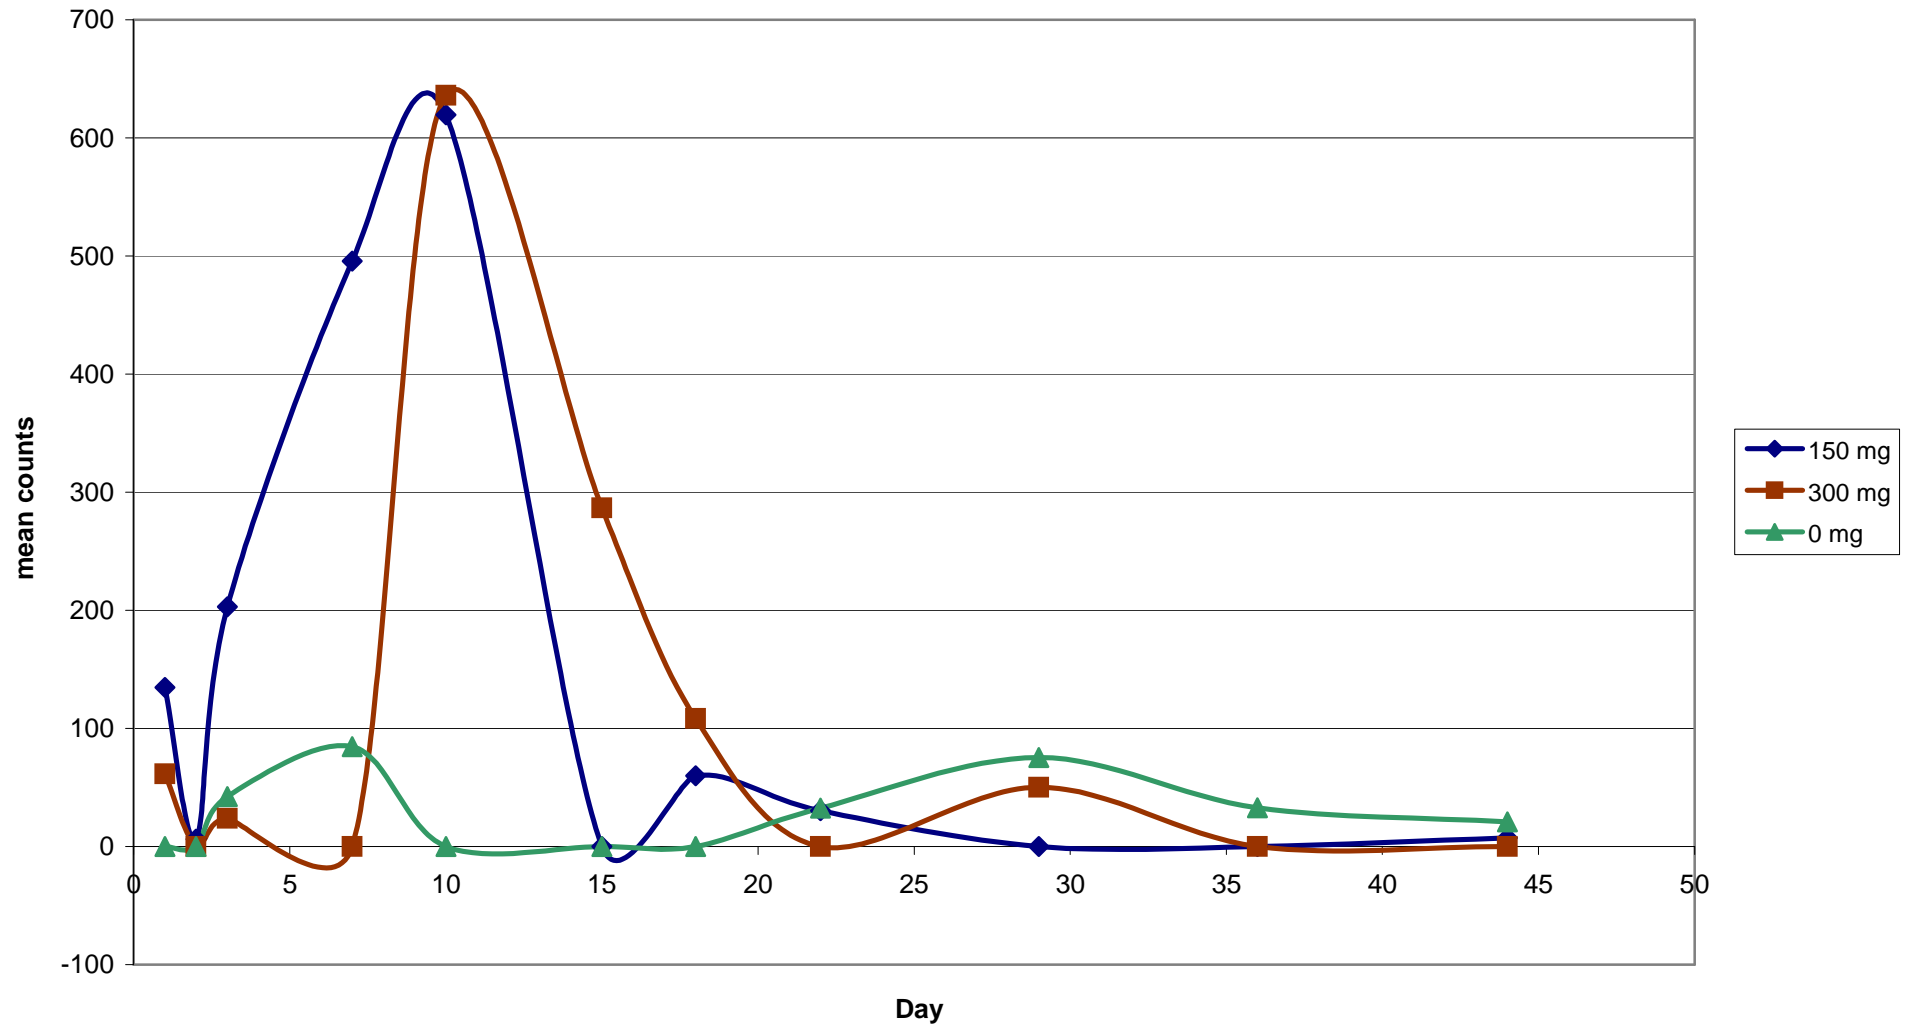

ID 6791

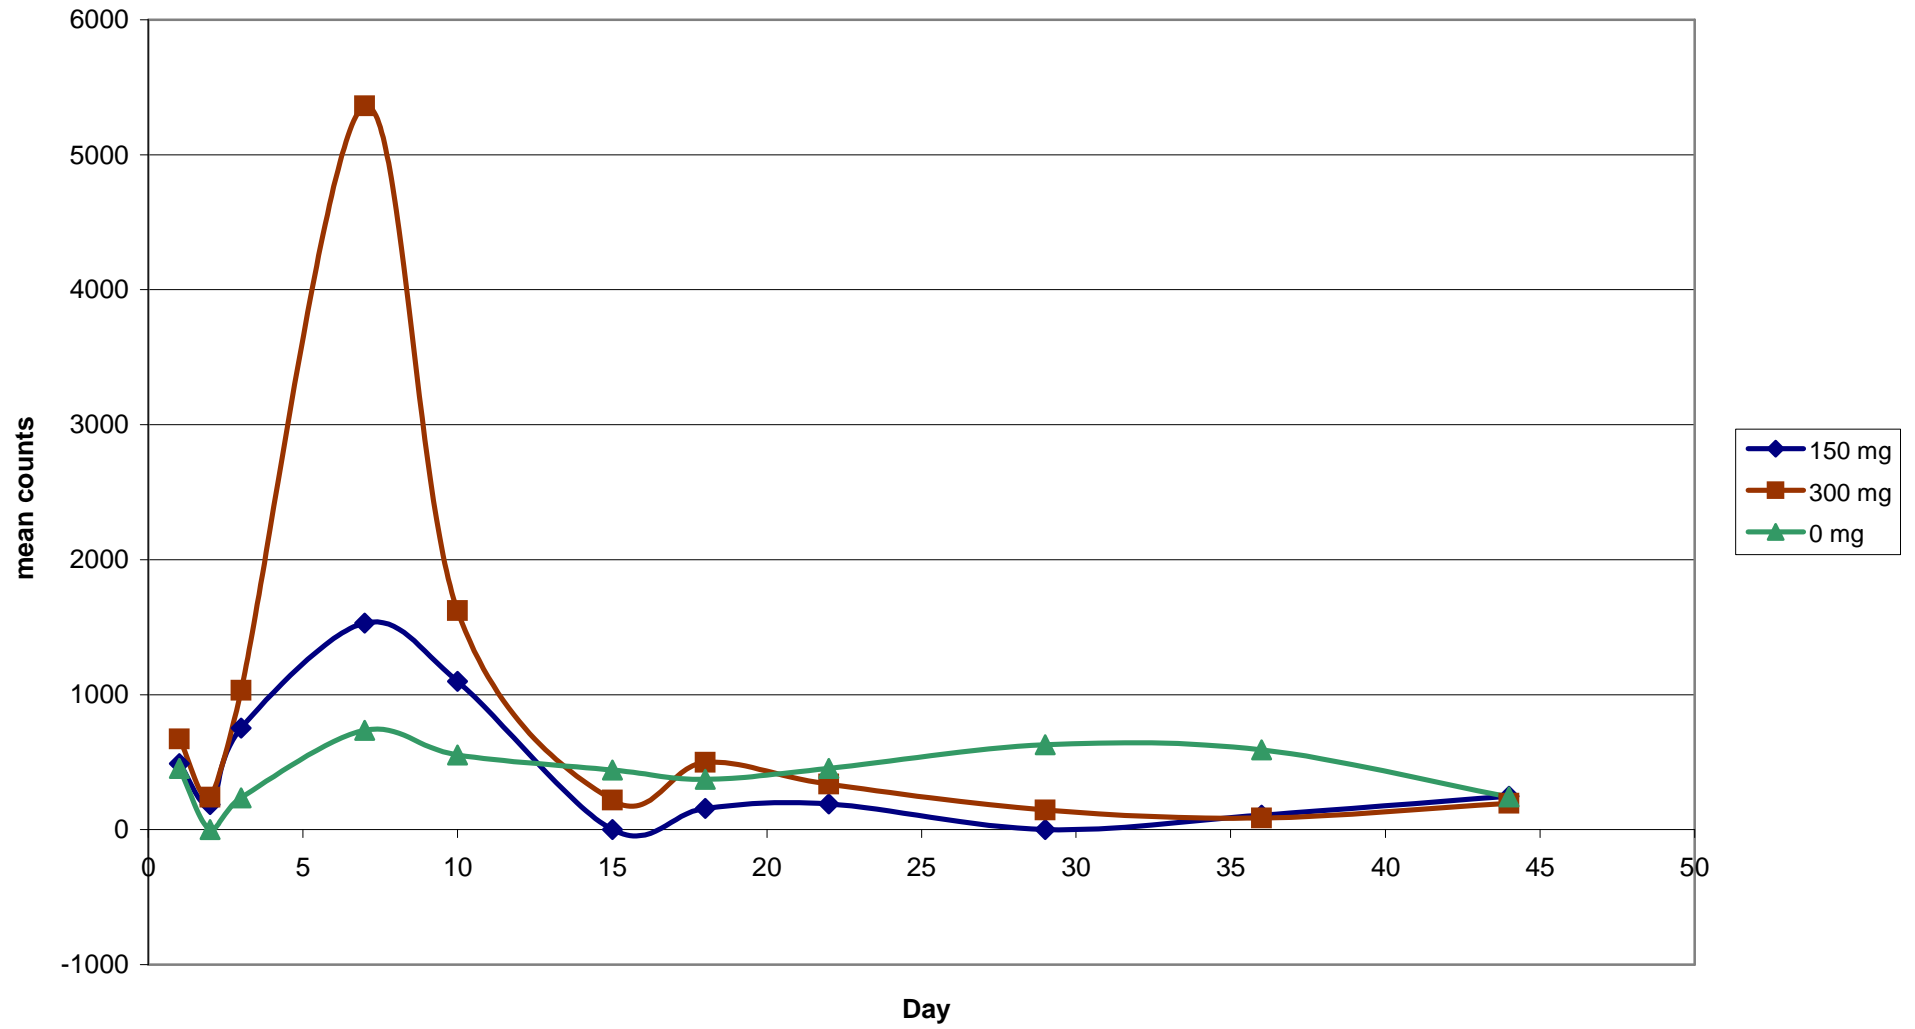

ID 6346

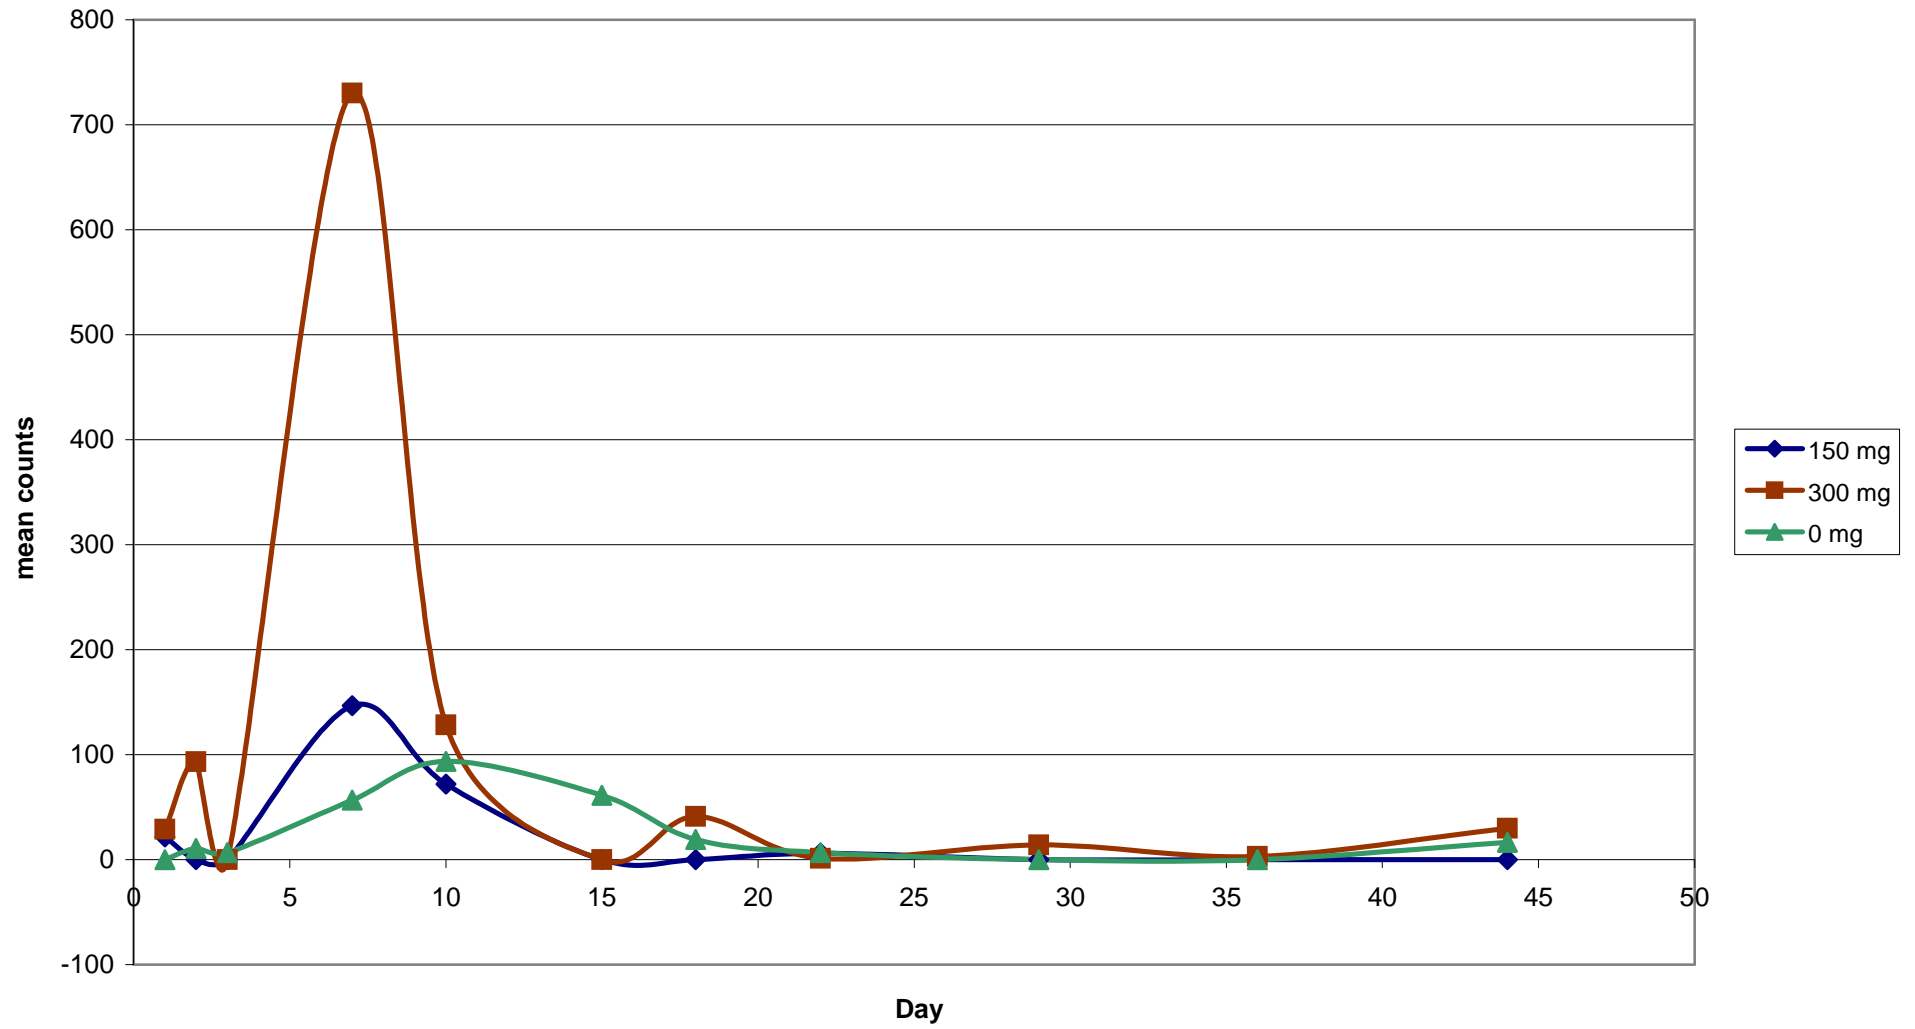

ID 6176

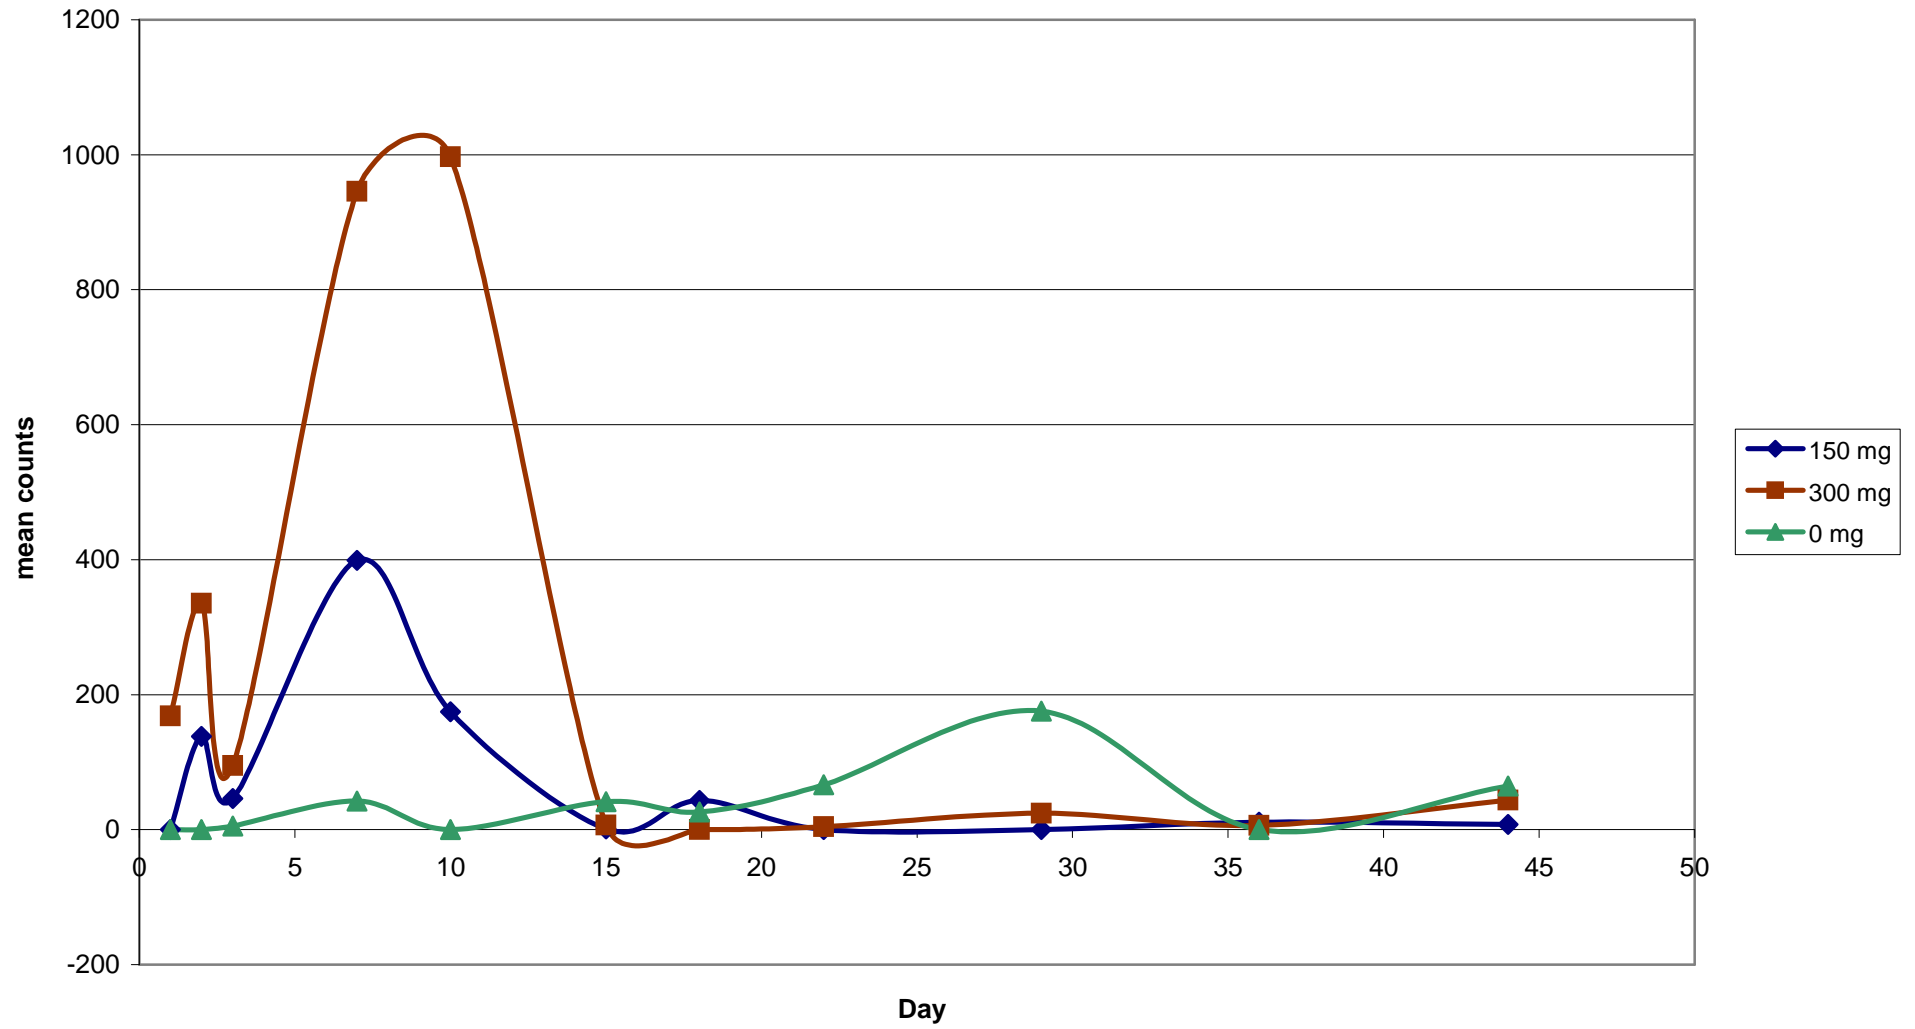

ID 5679

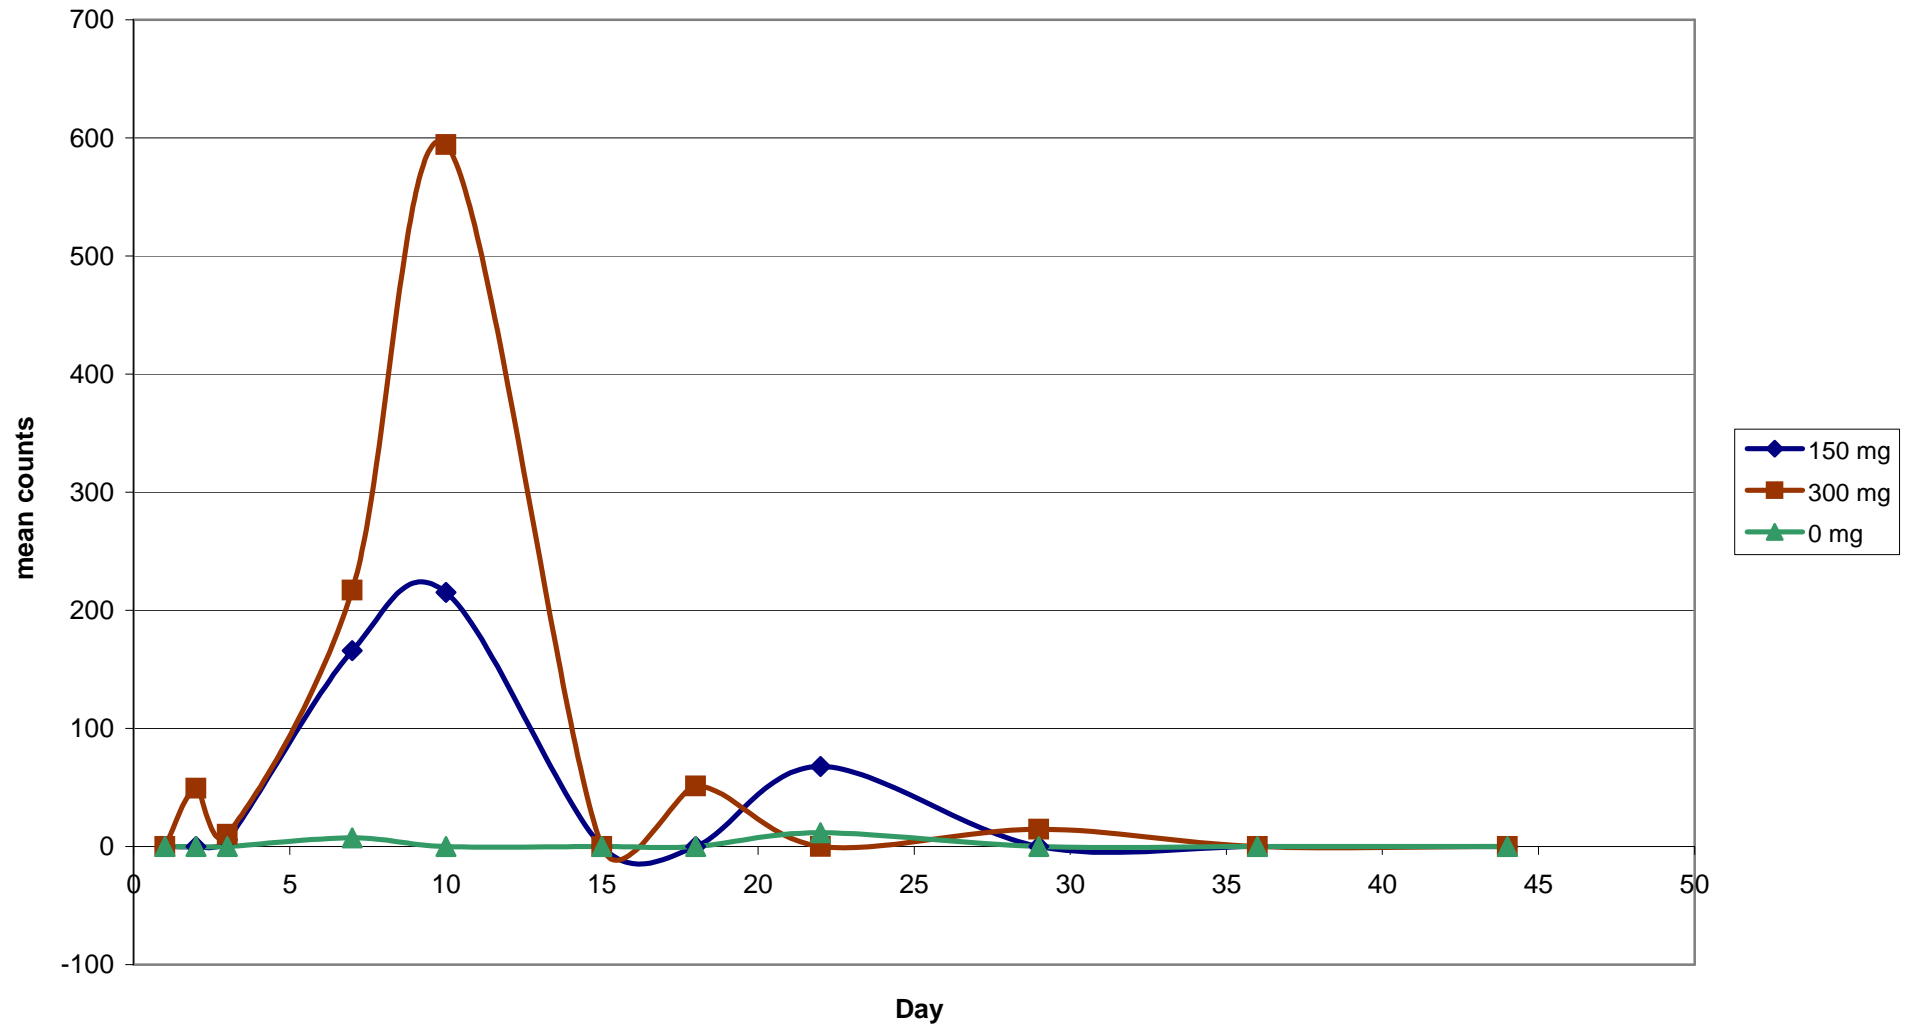

ID 5617

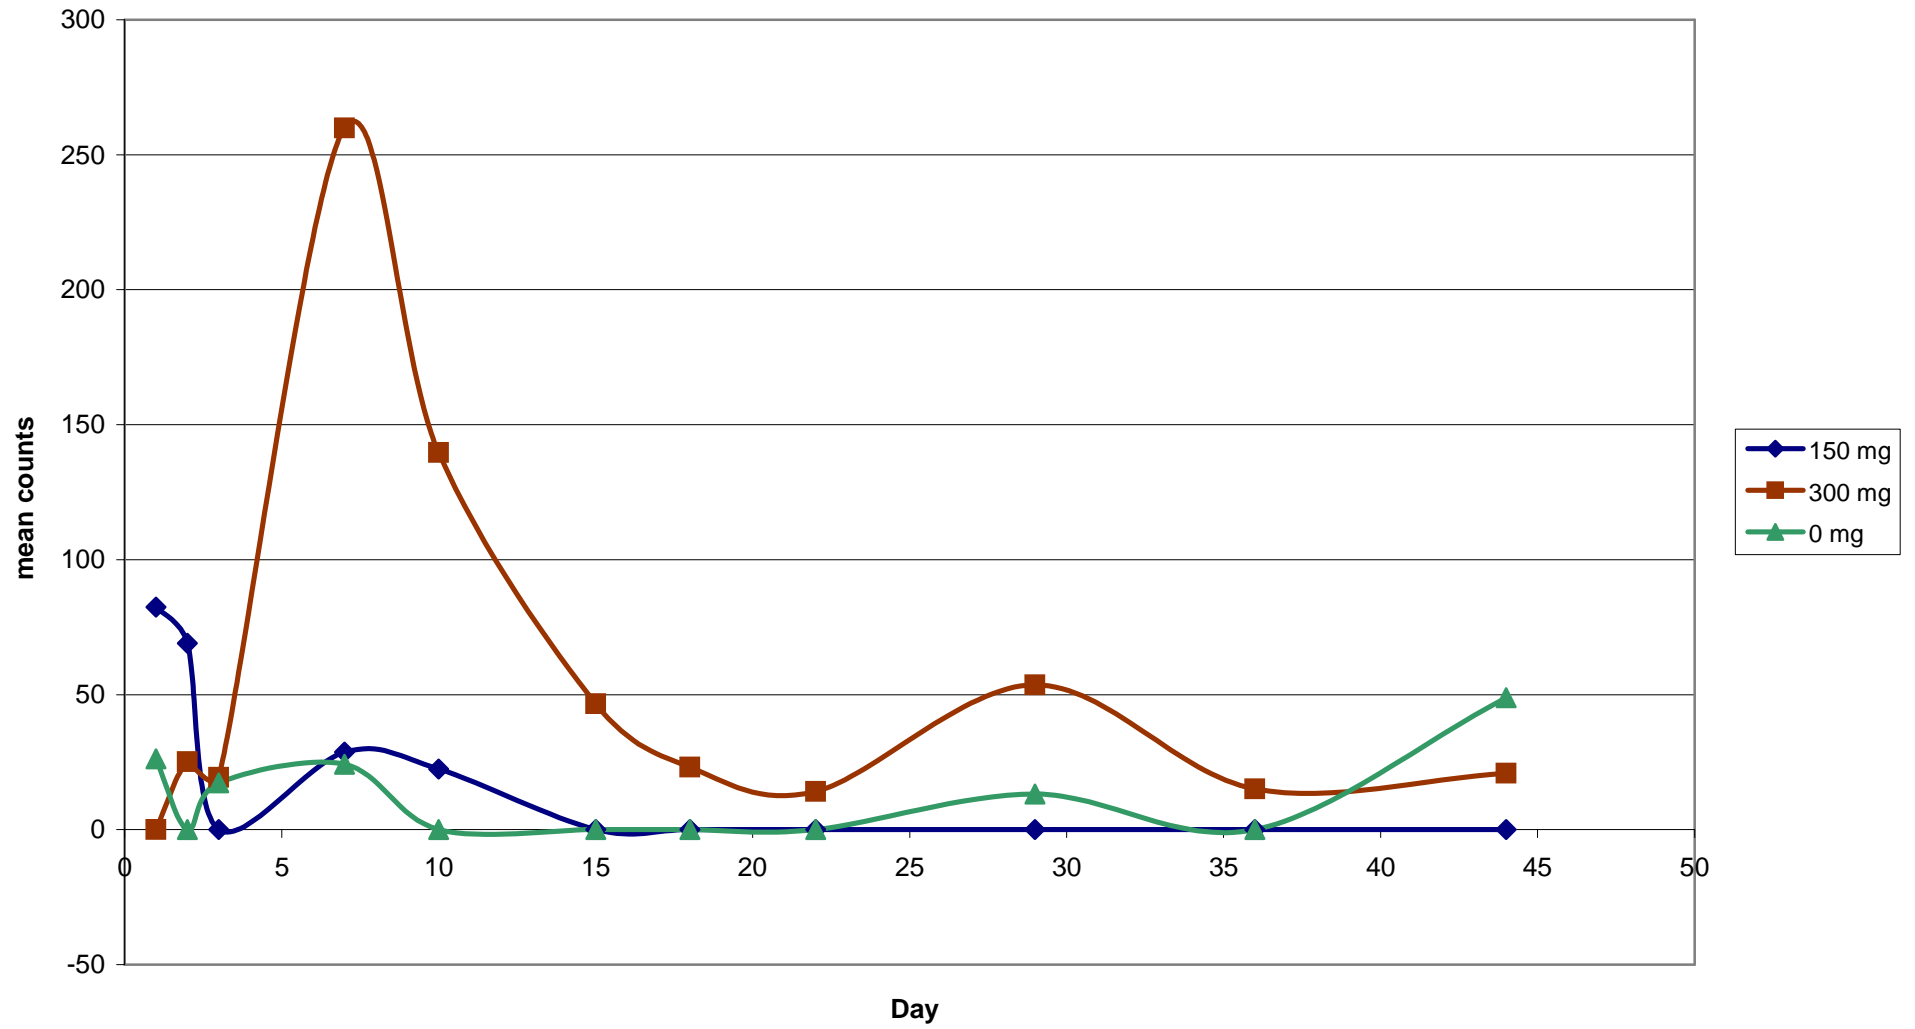

ID 5091

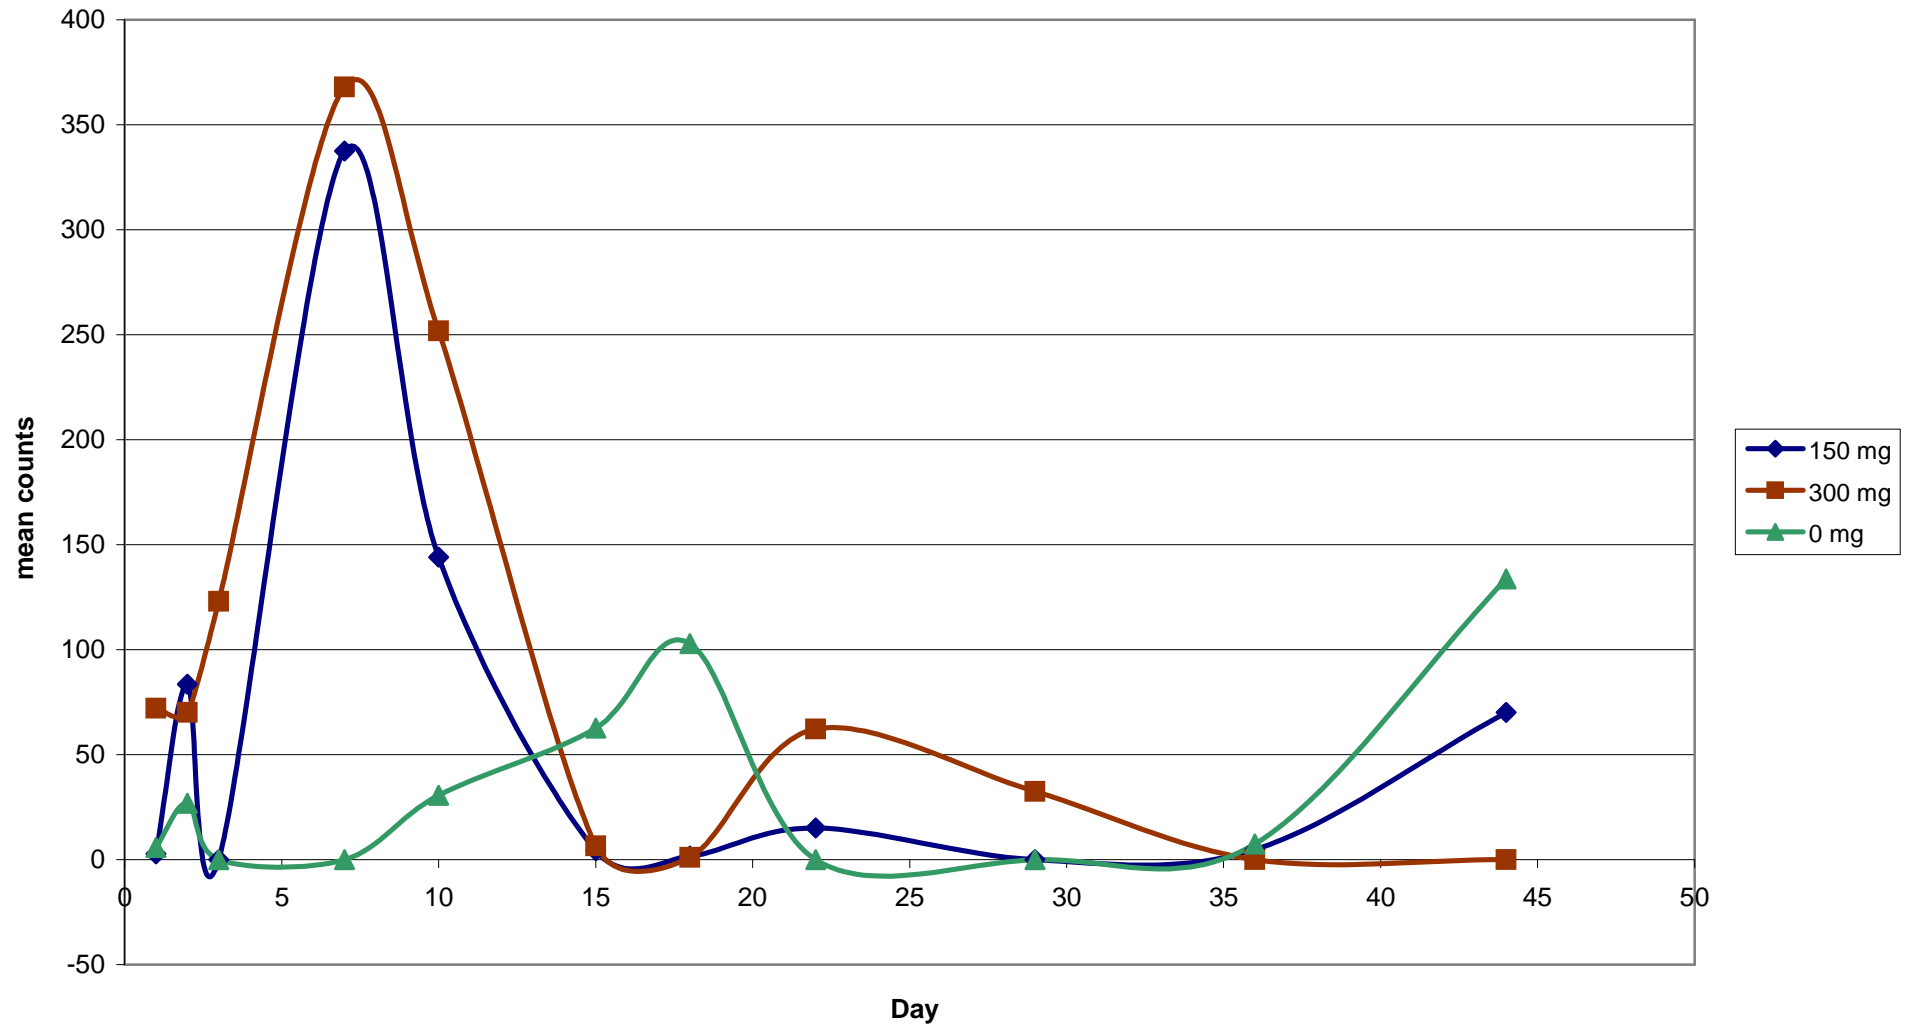

ID 5064

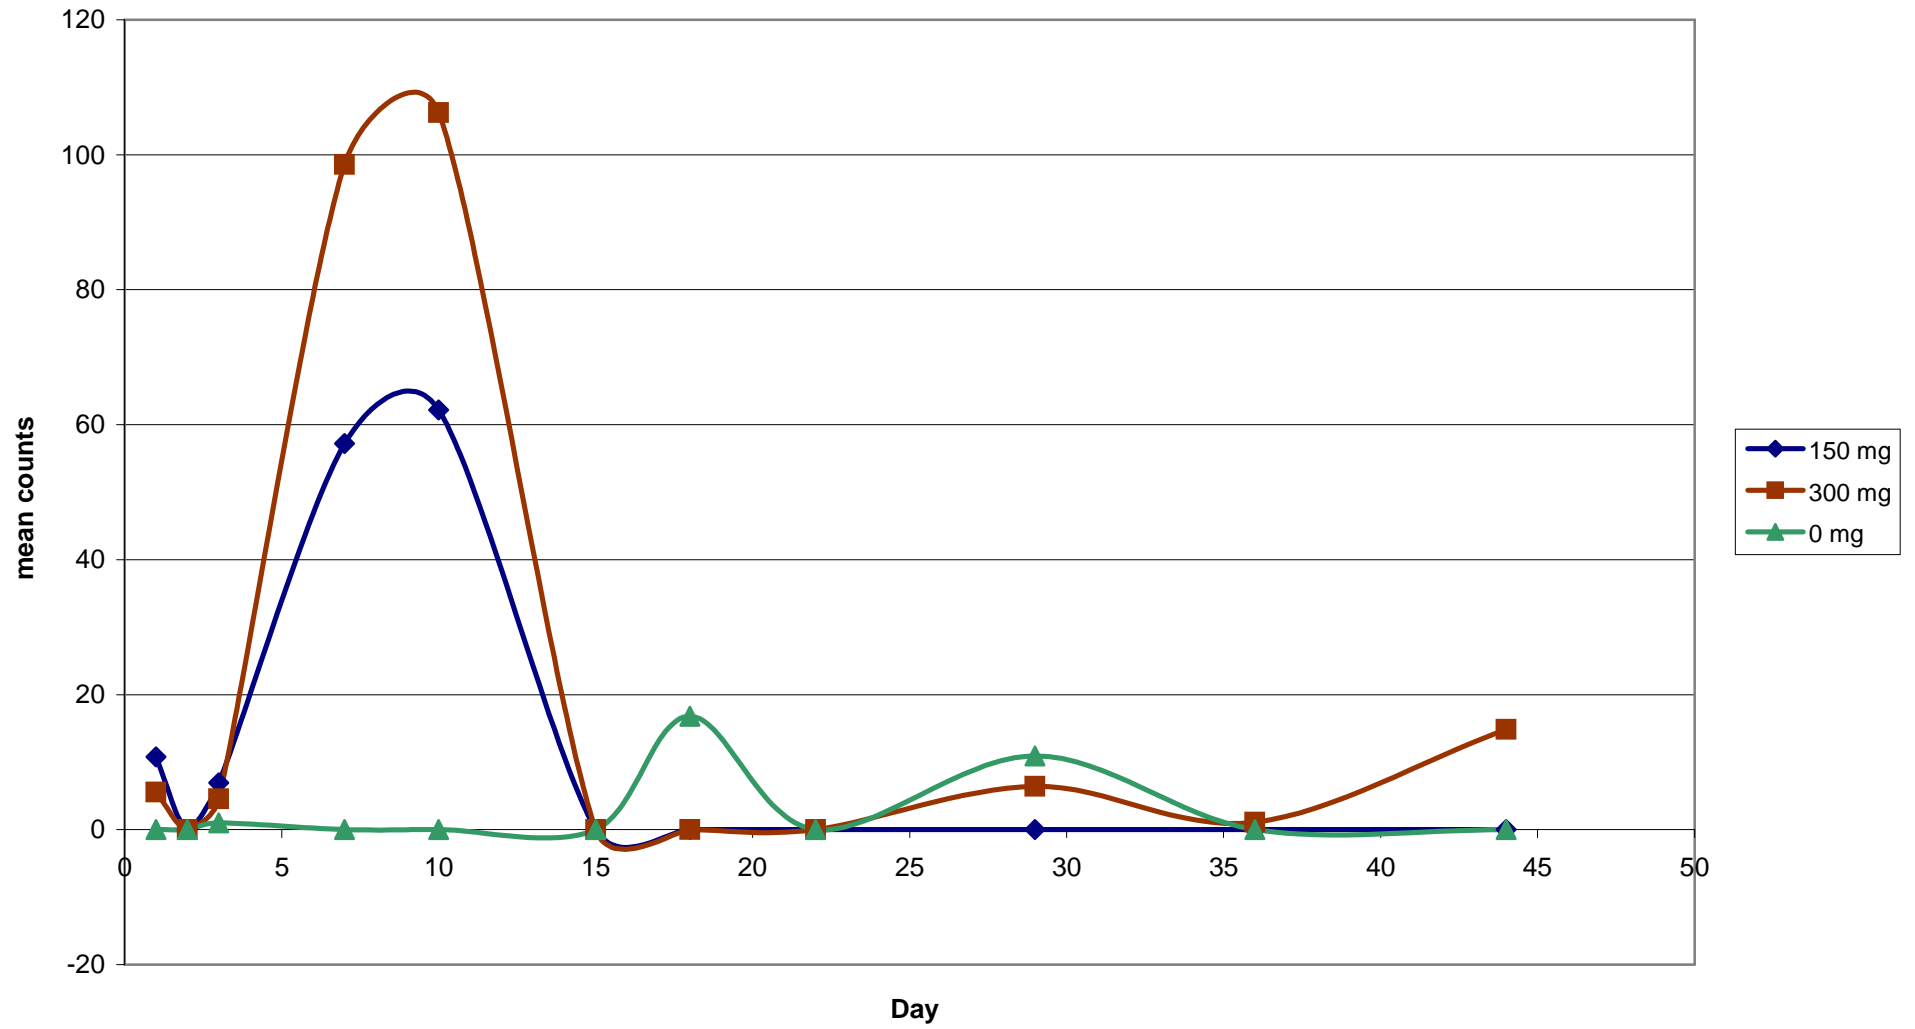



ID 4986

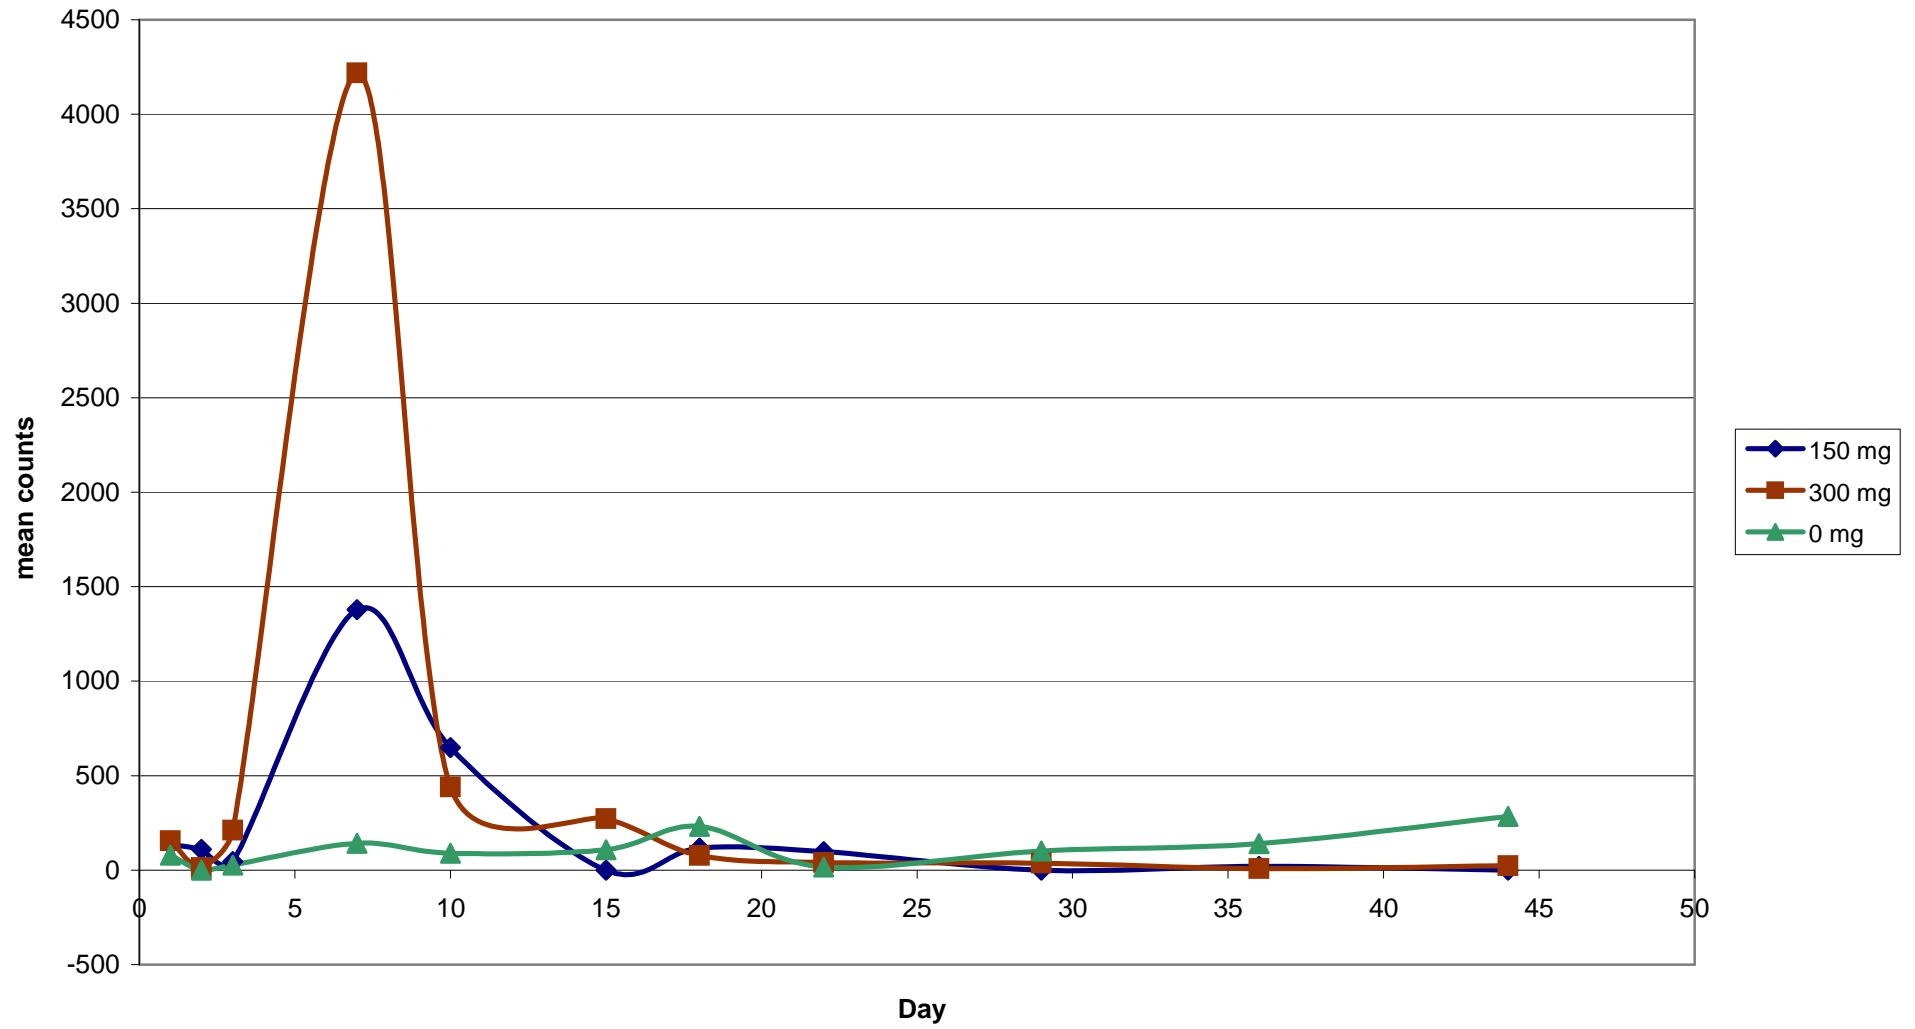

ID 4182

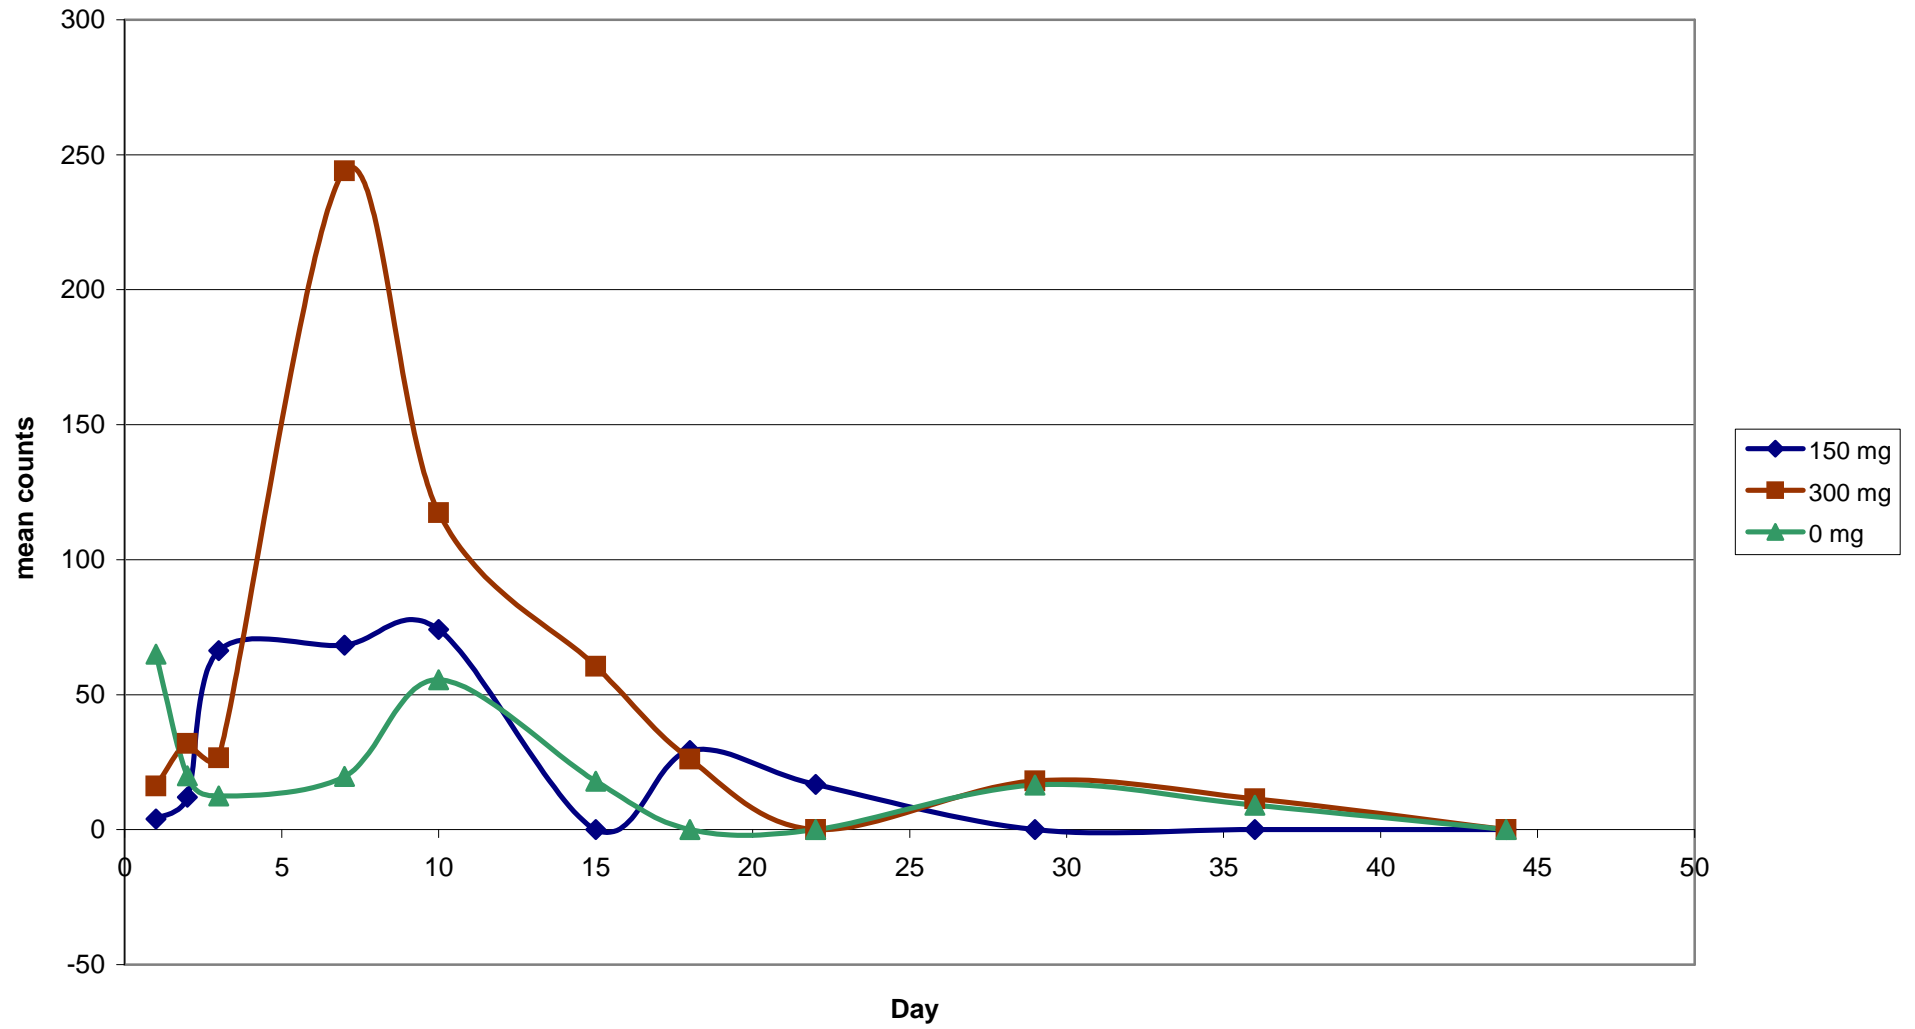

ID 4033

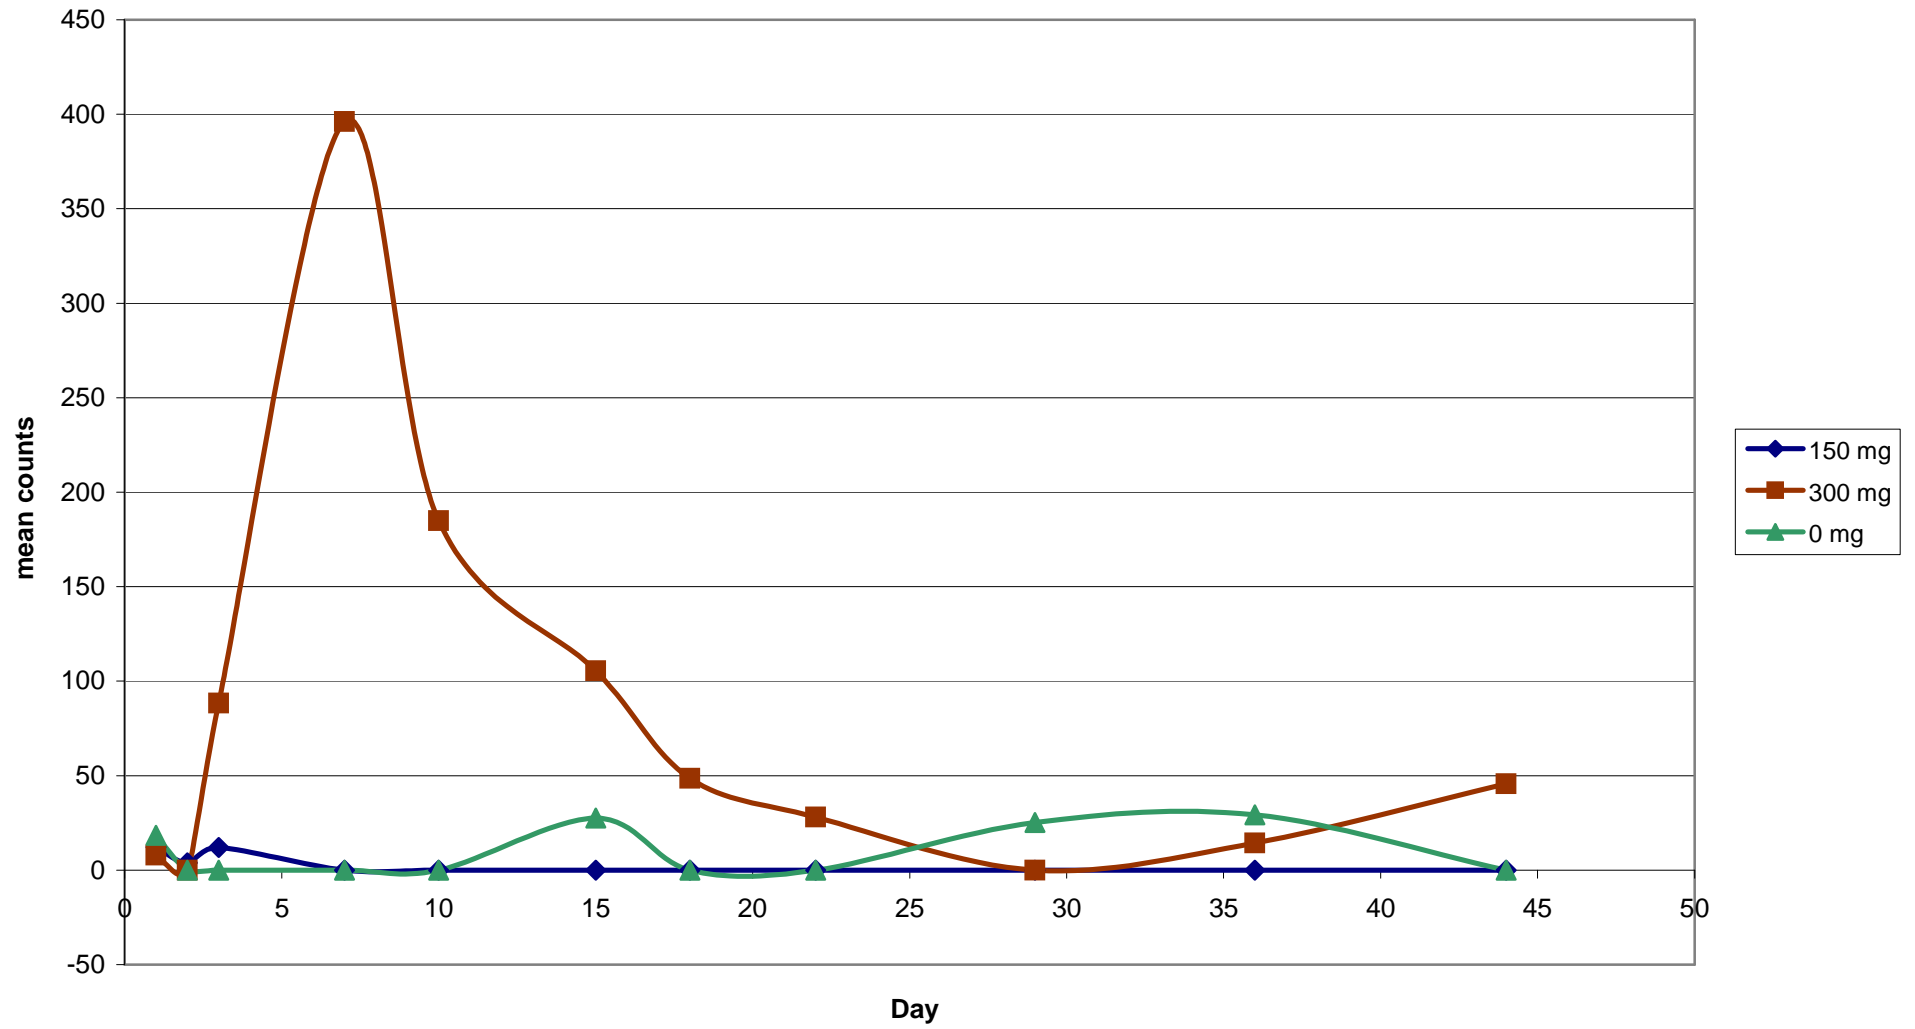

ID 3783

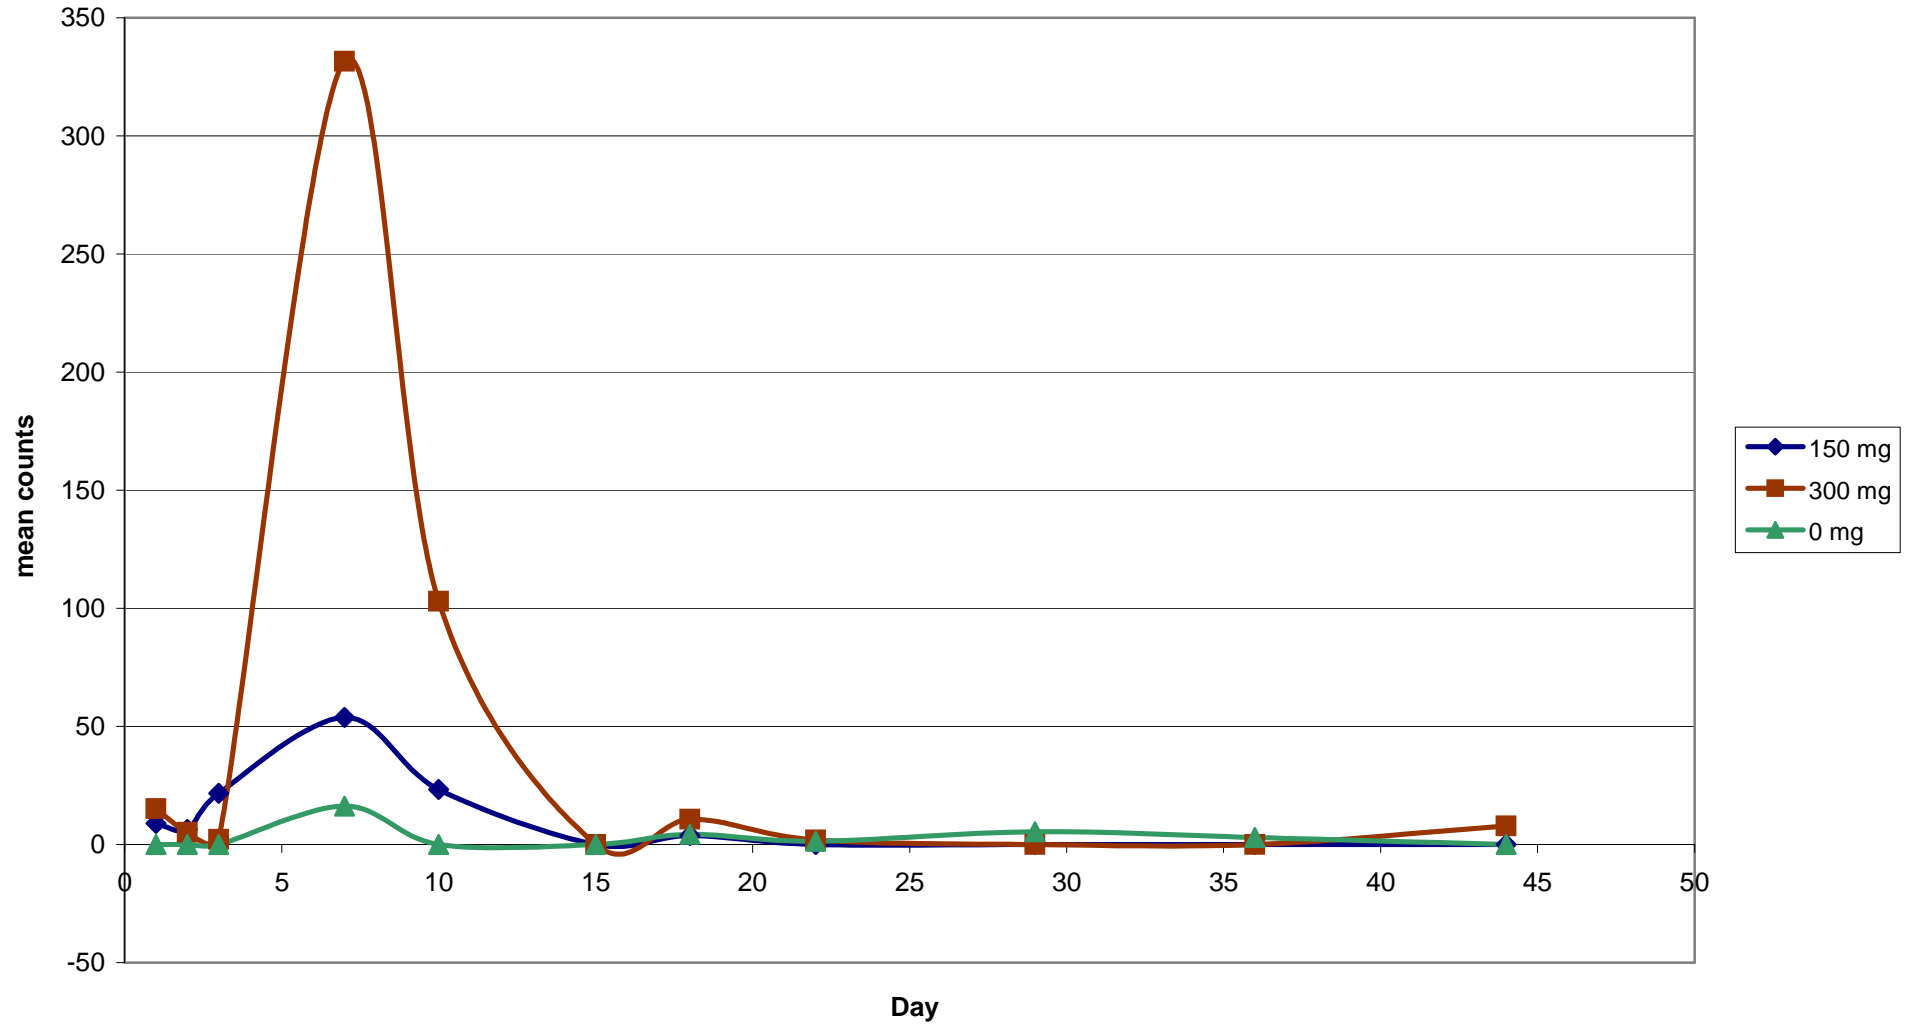

ID 2749

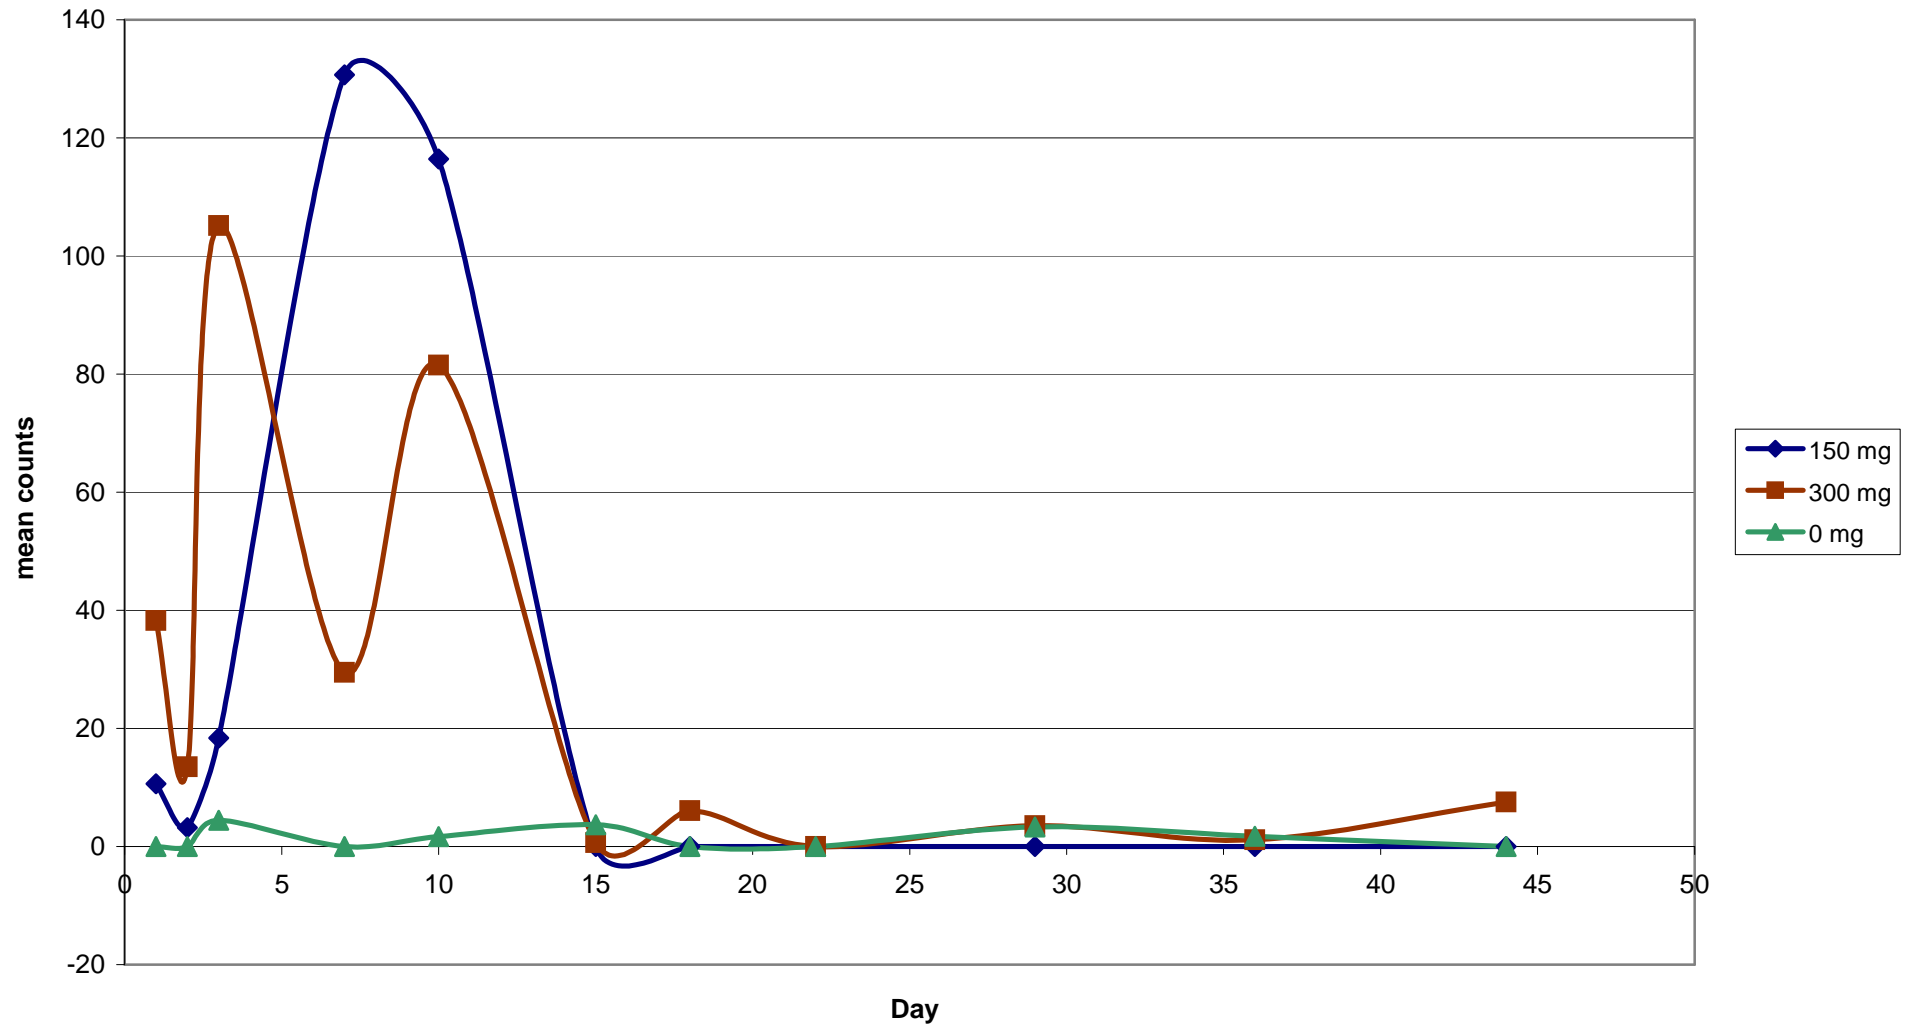

ID 2269

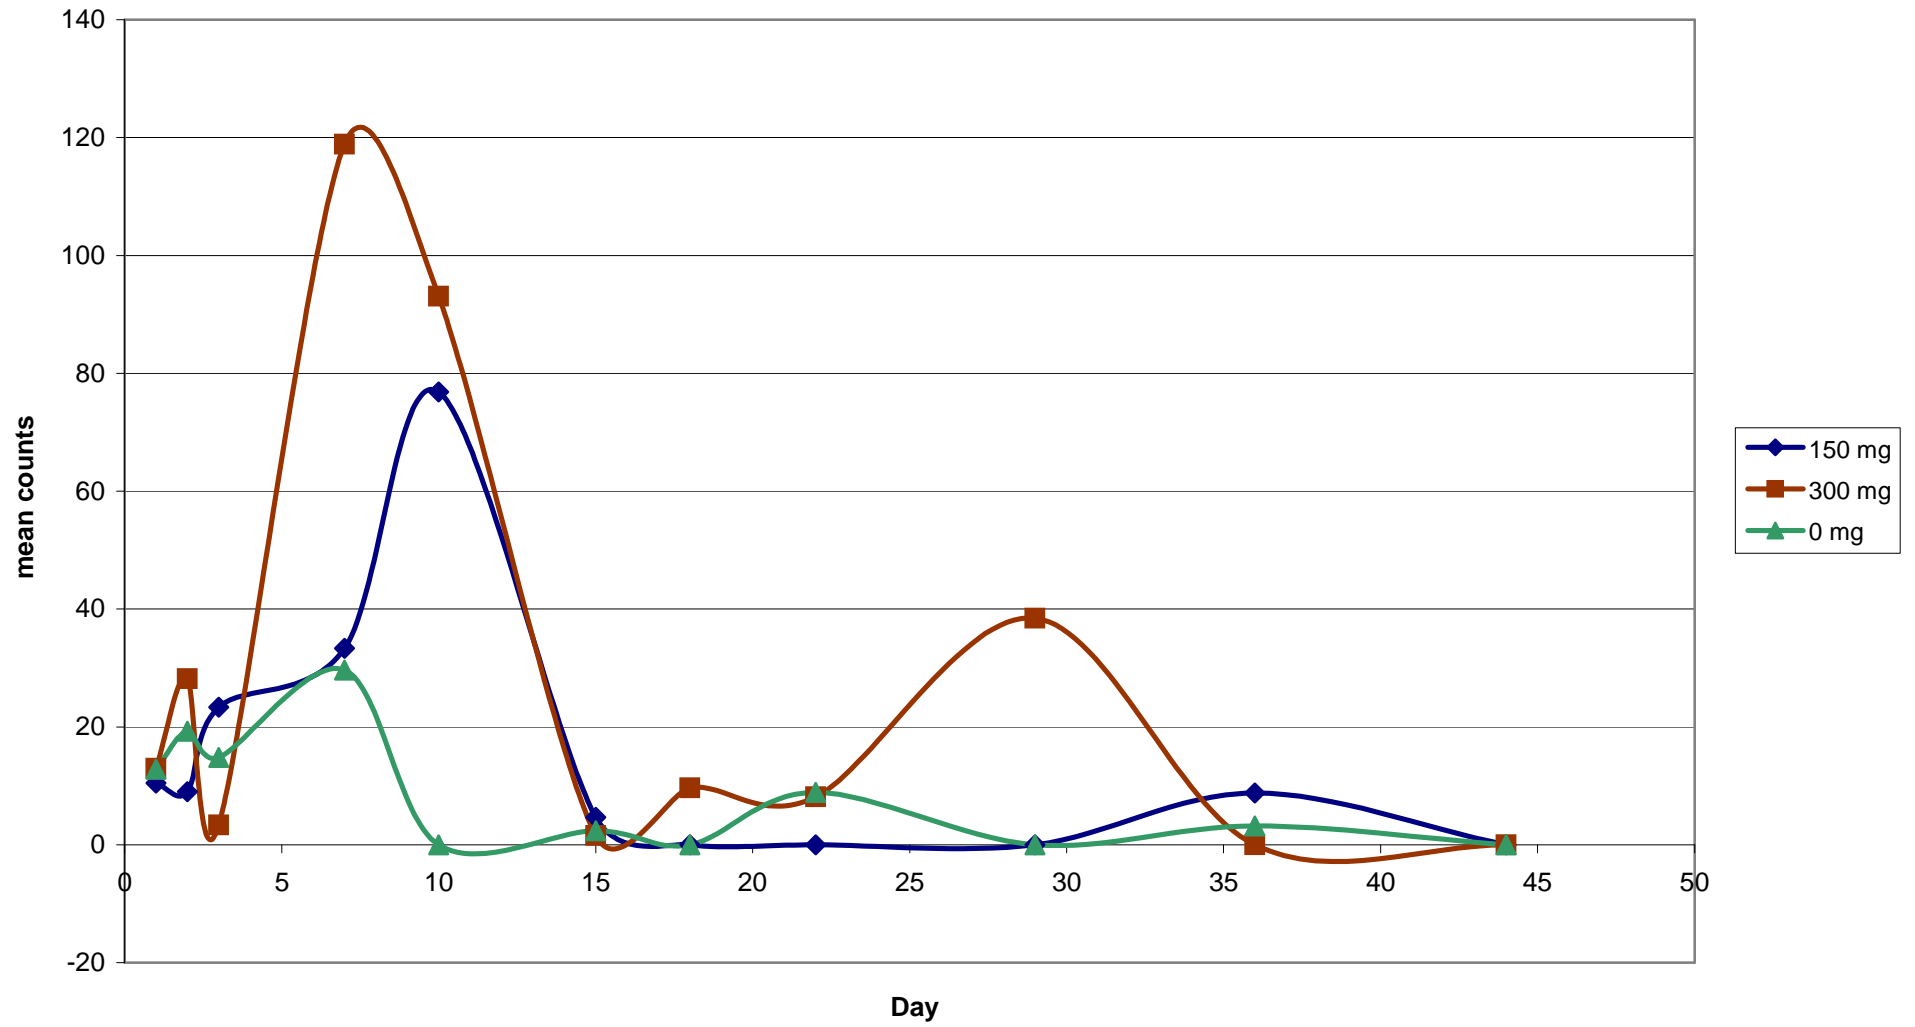

ID 1551

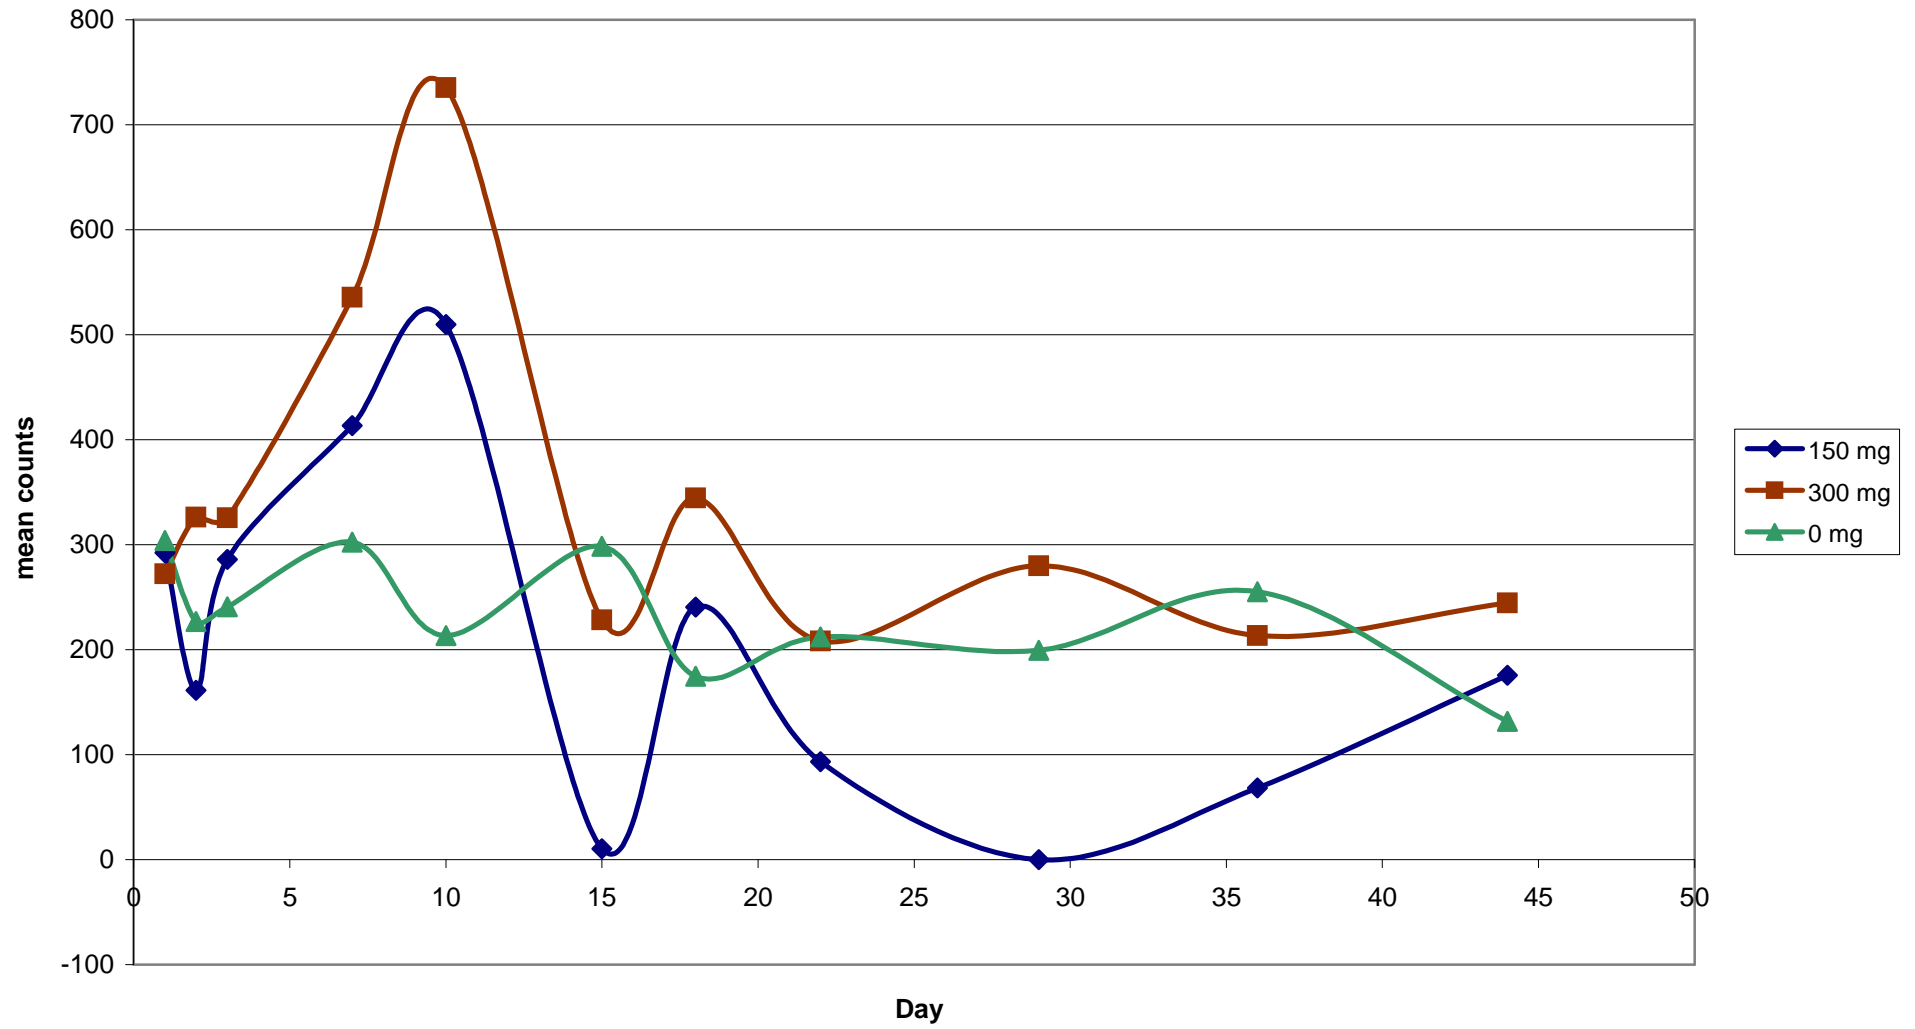

ID 646

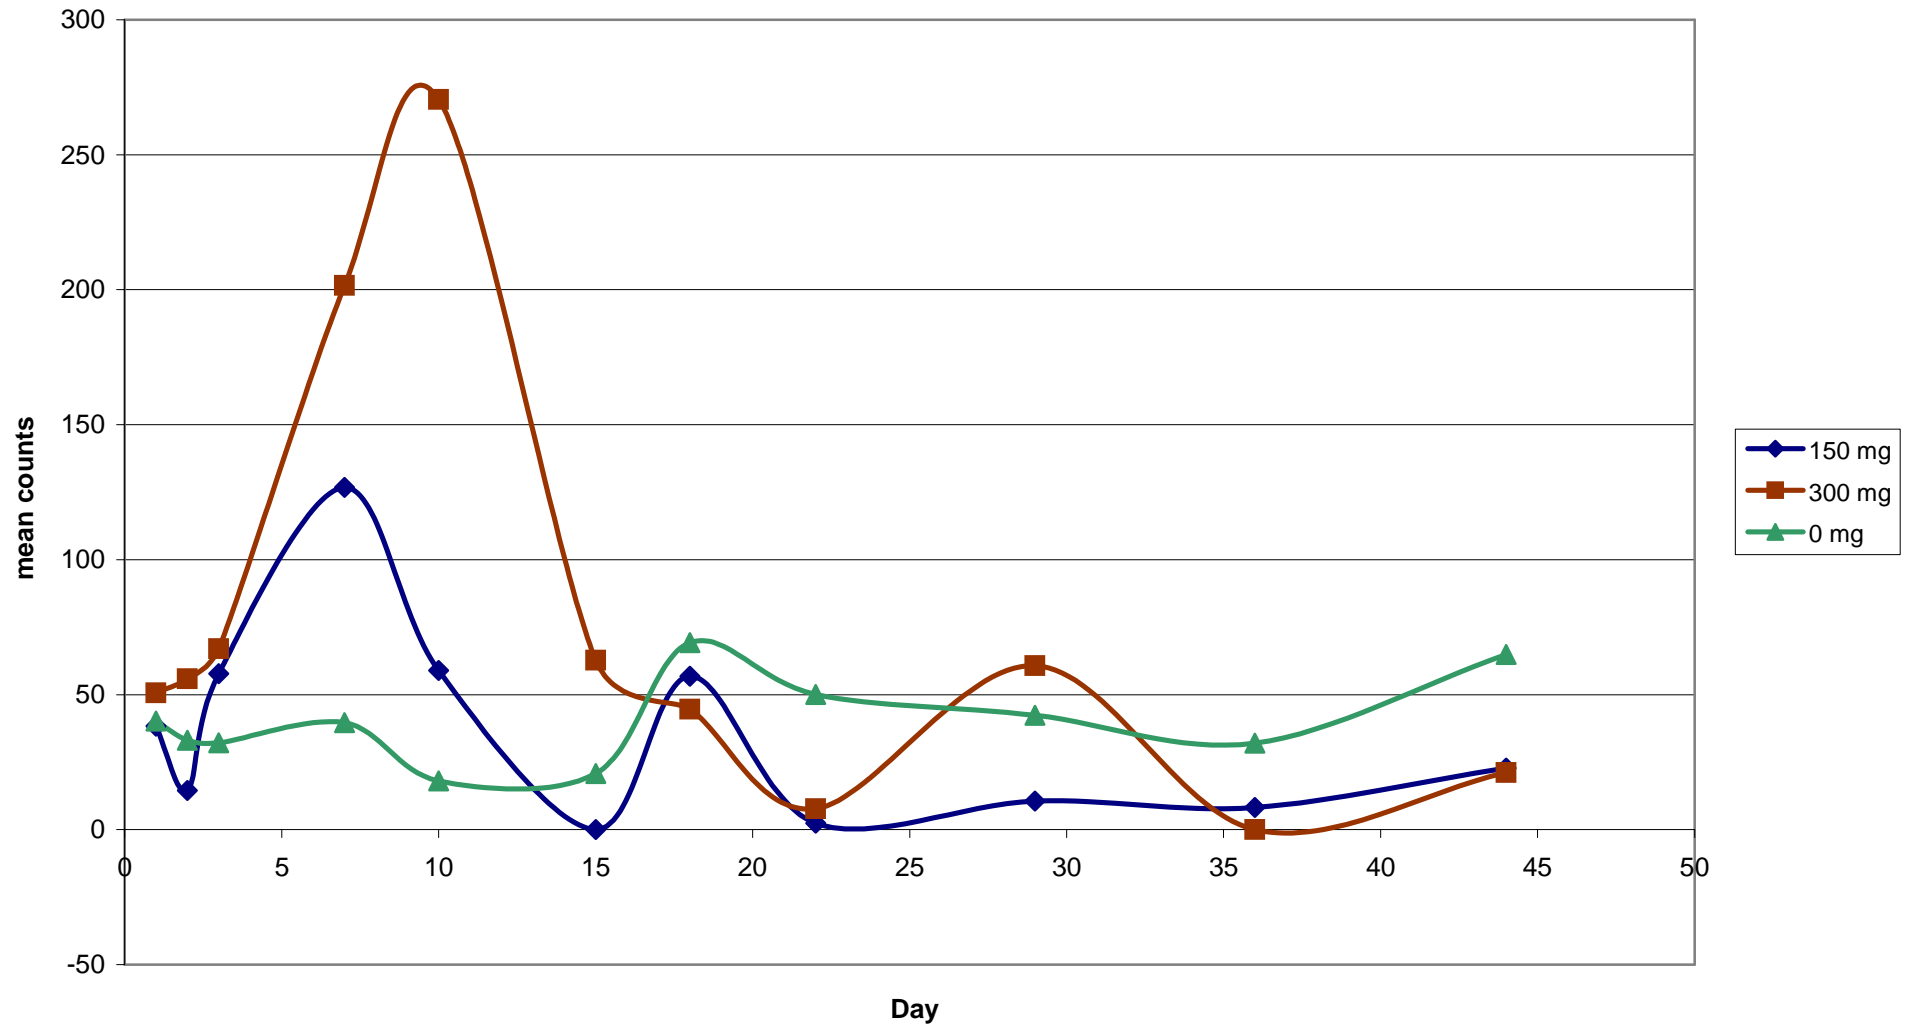



ID 17704

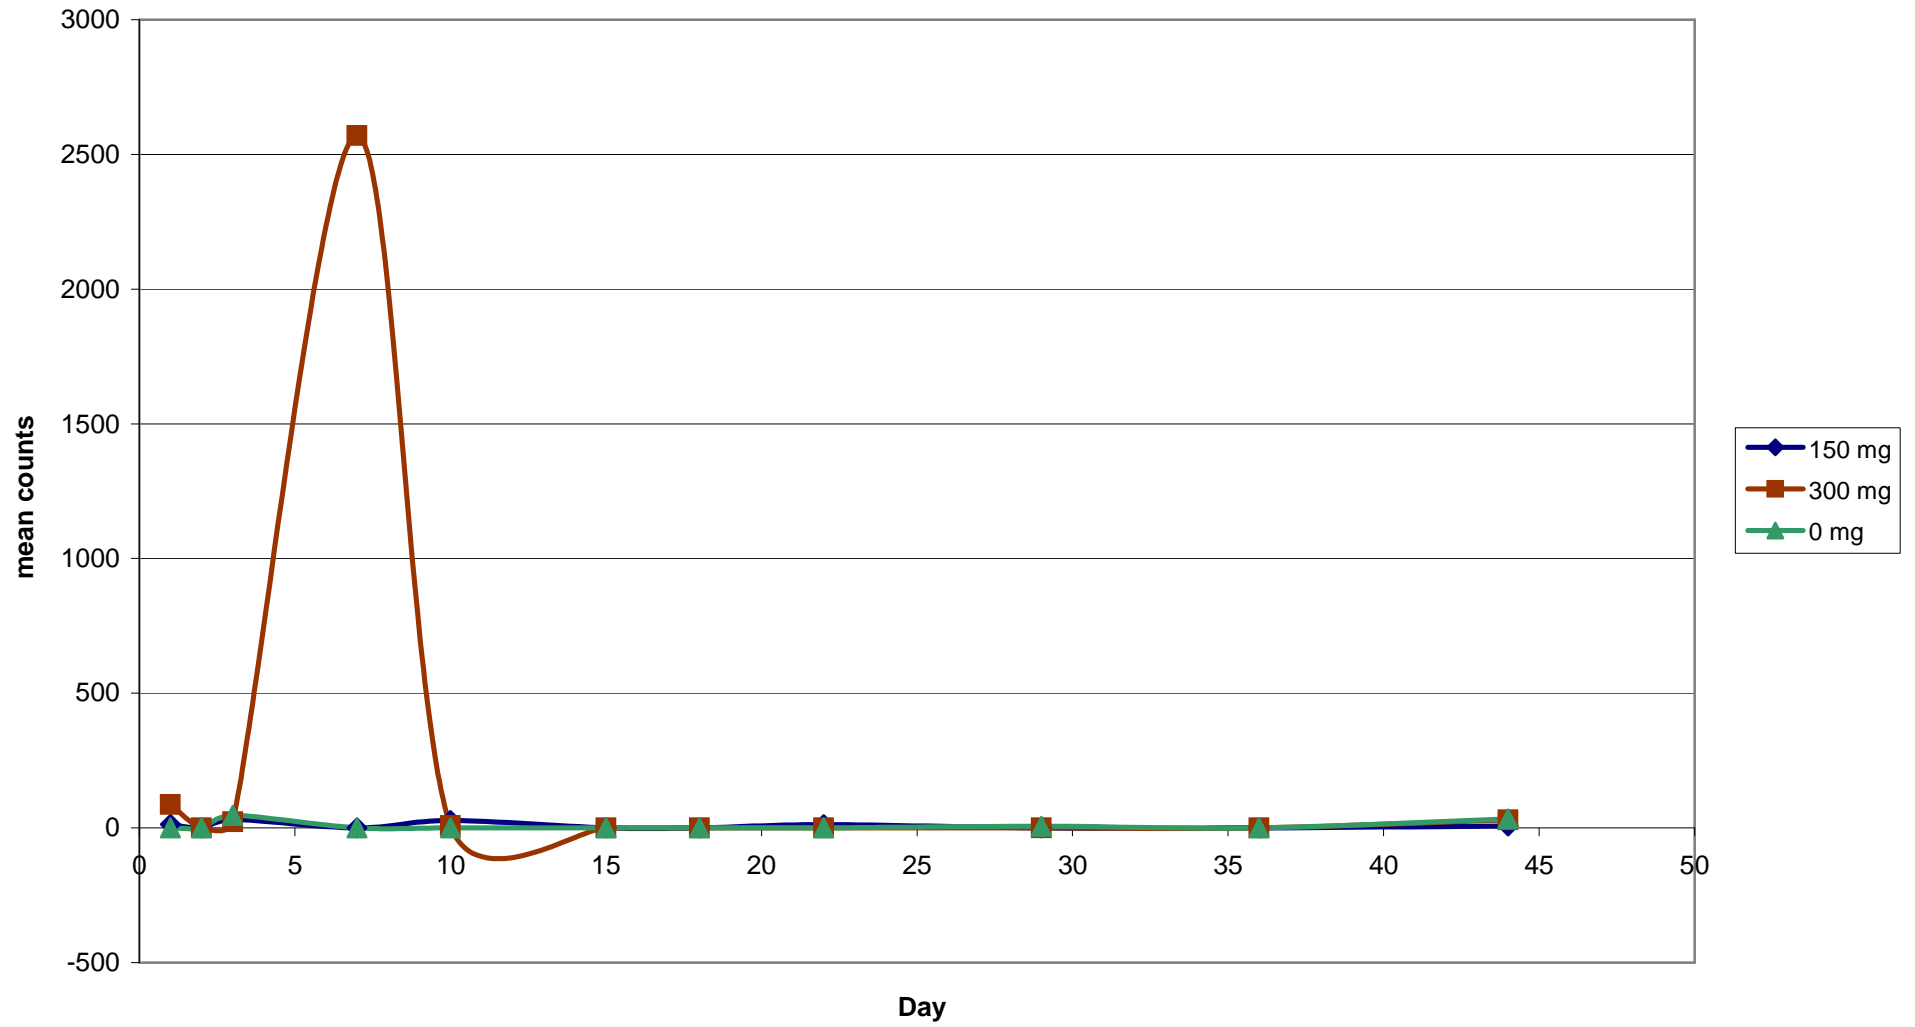

ID 17588

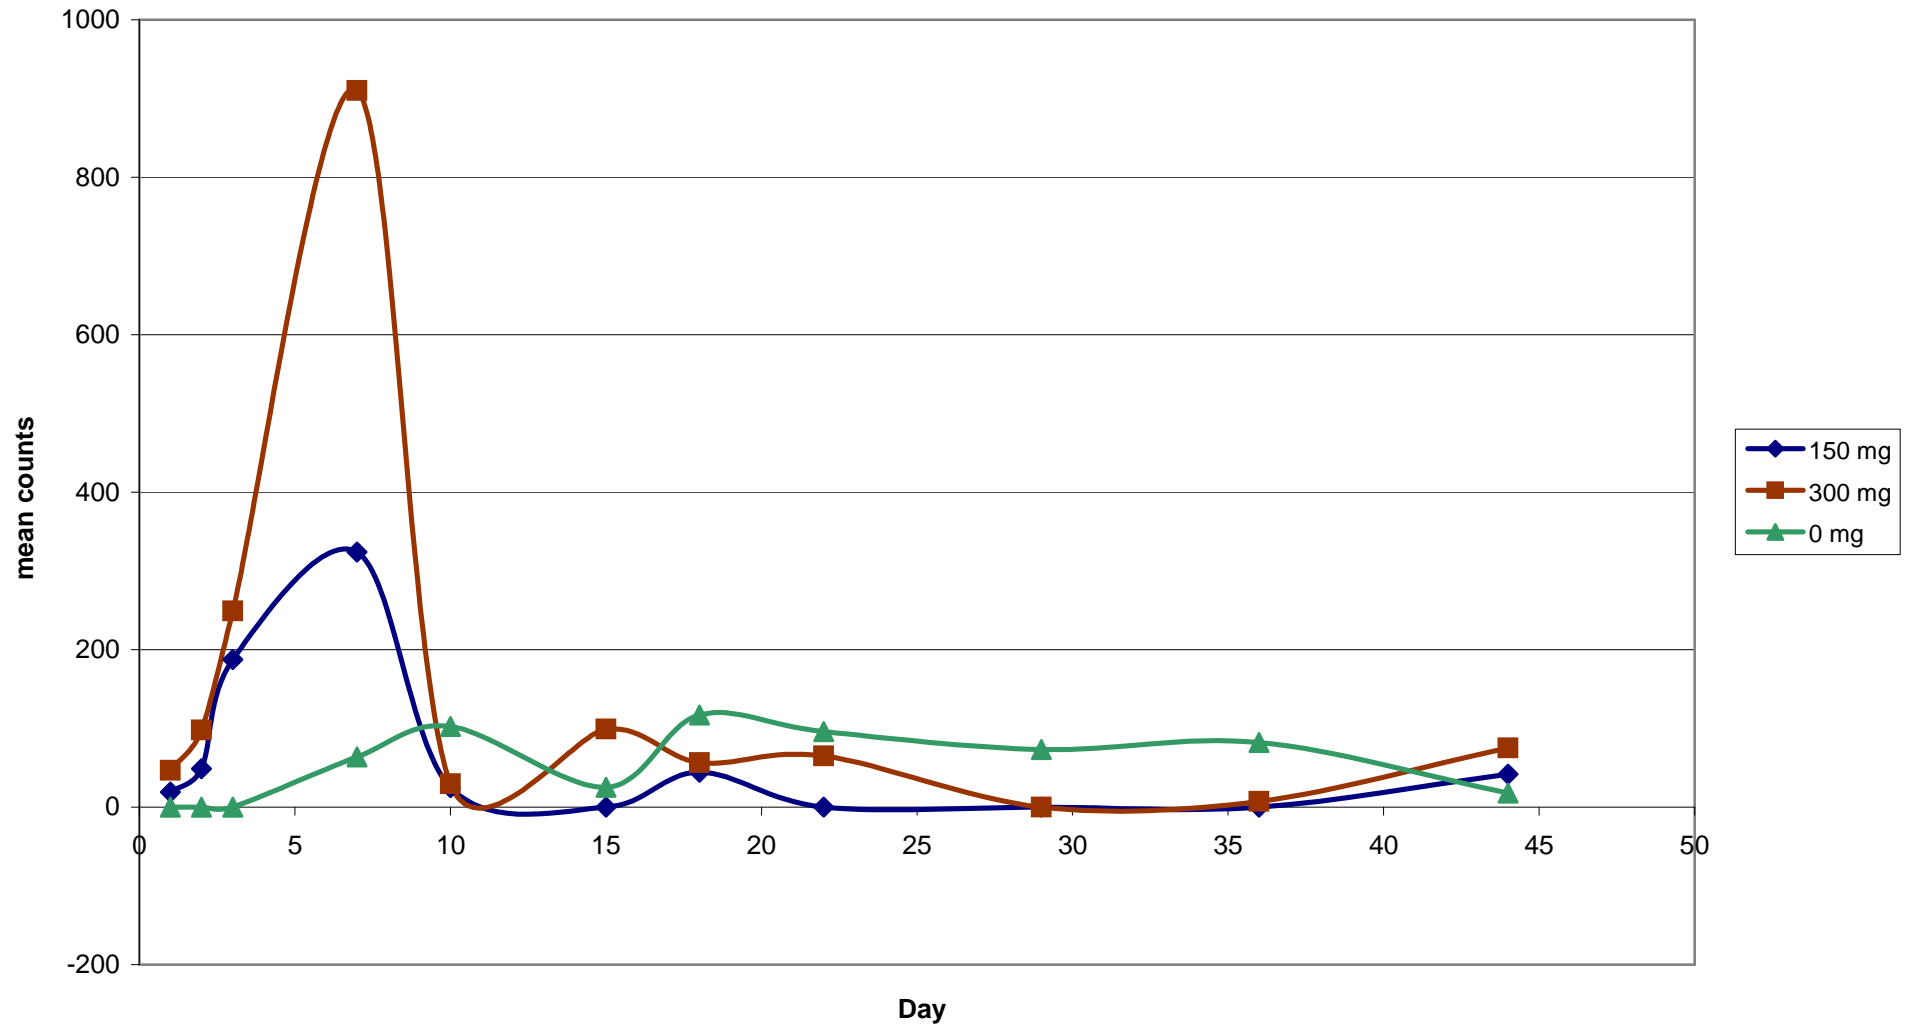

ID 17570

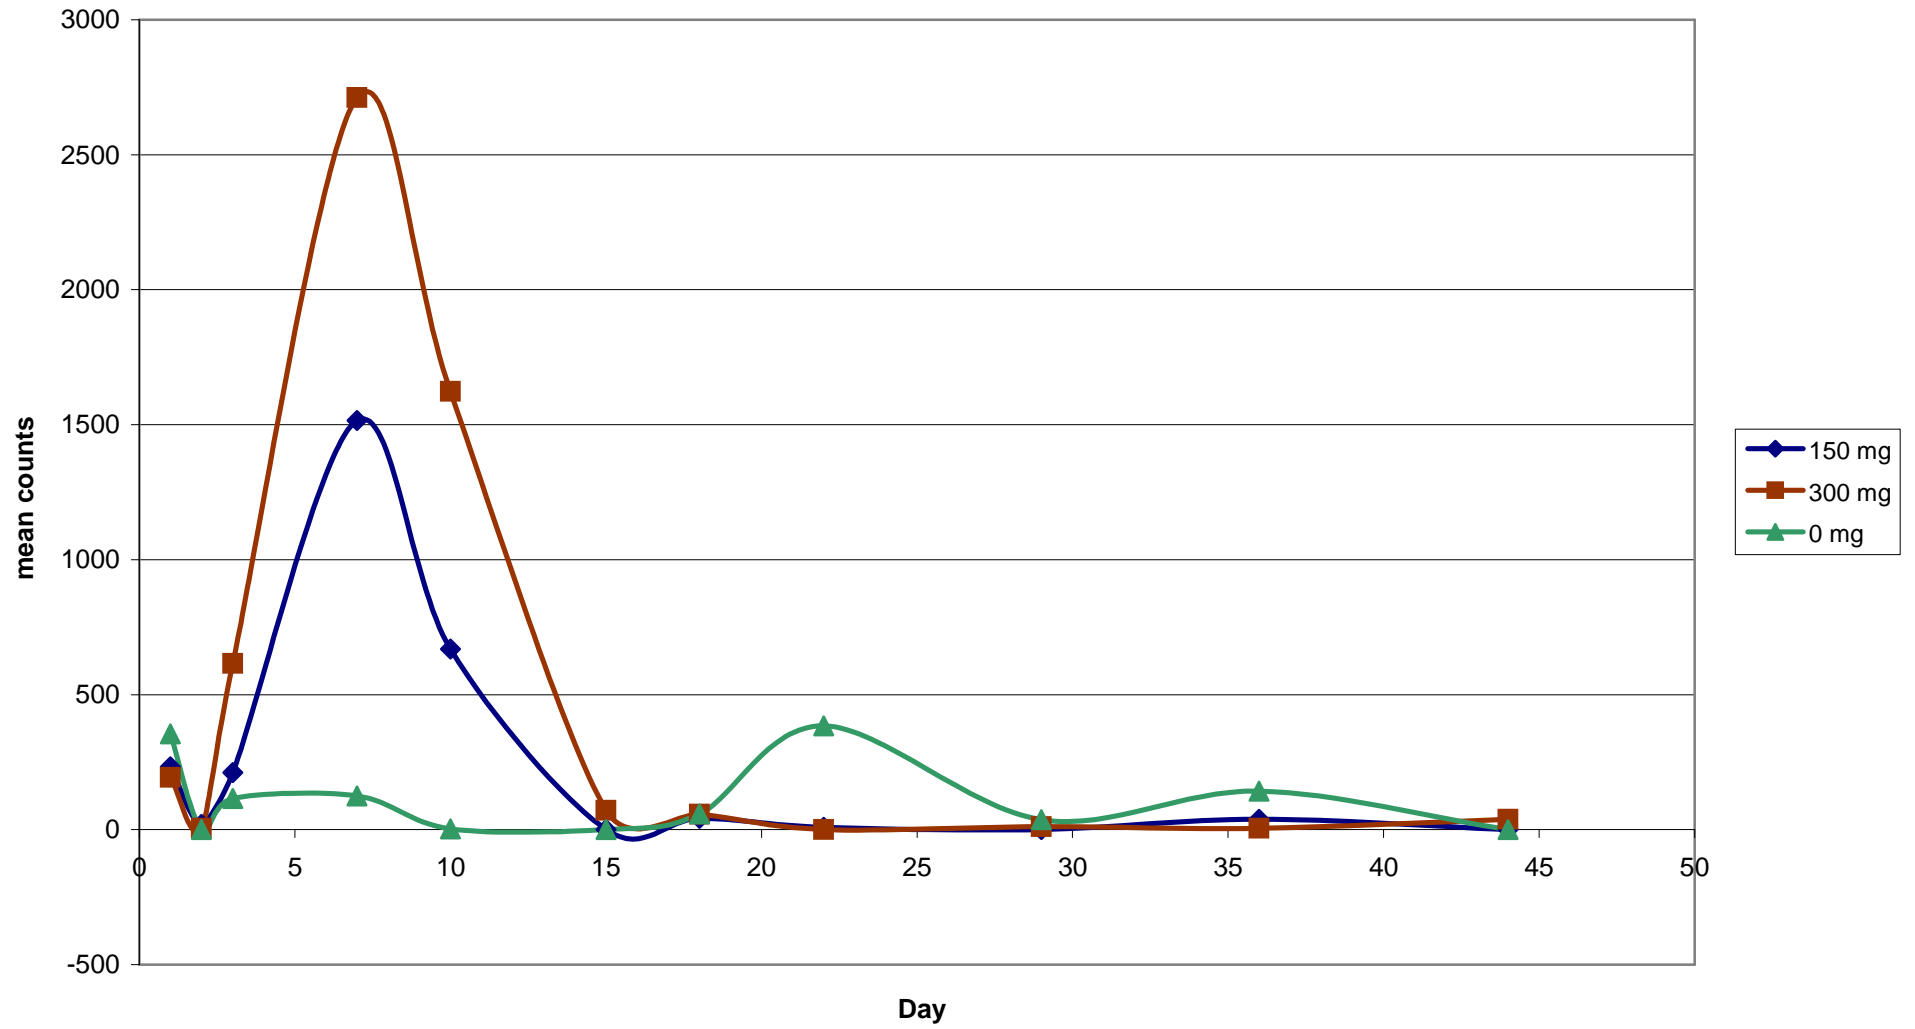

ID 17479

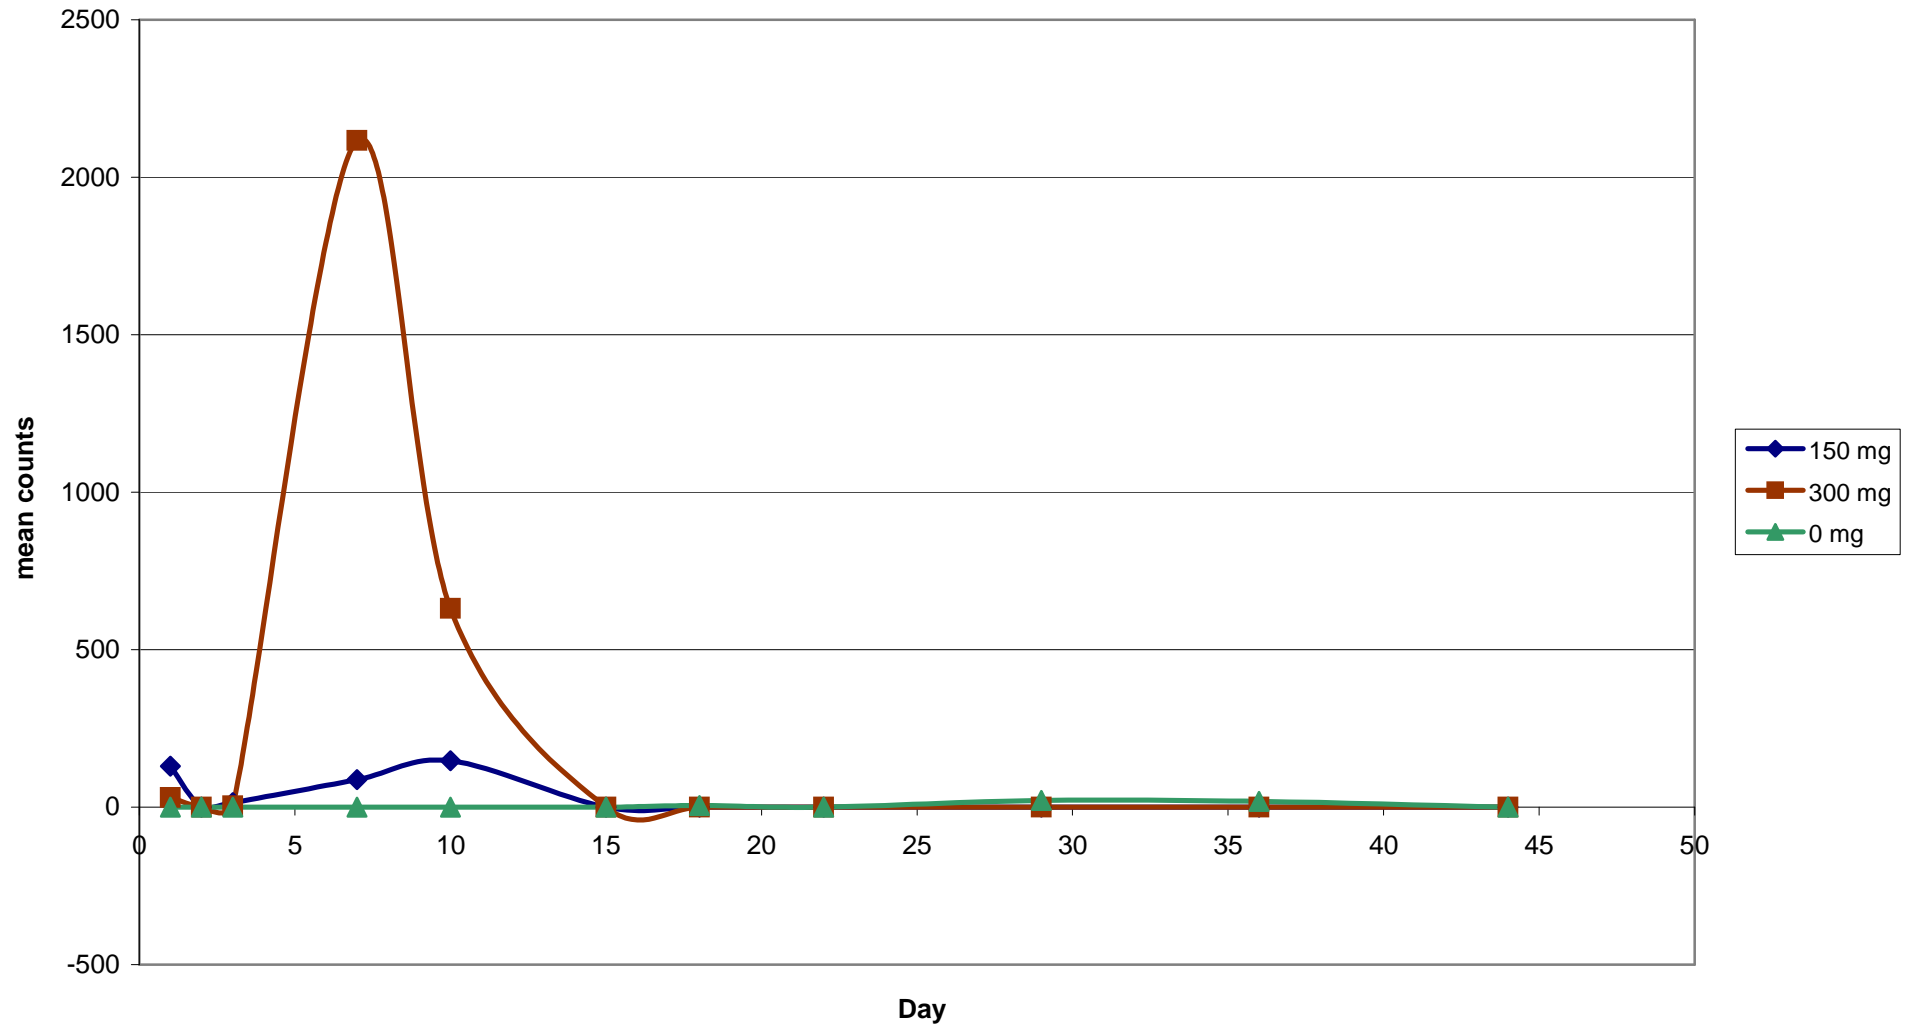

ID 17380

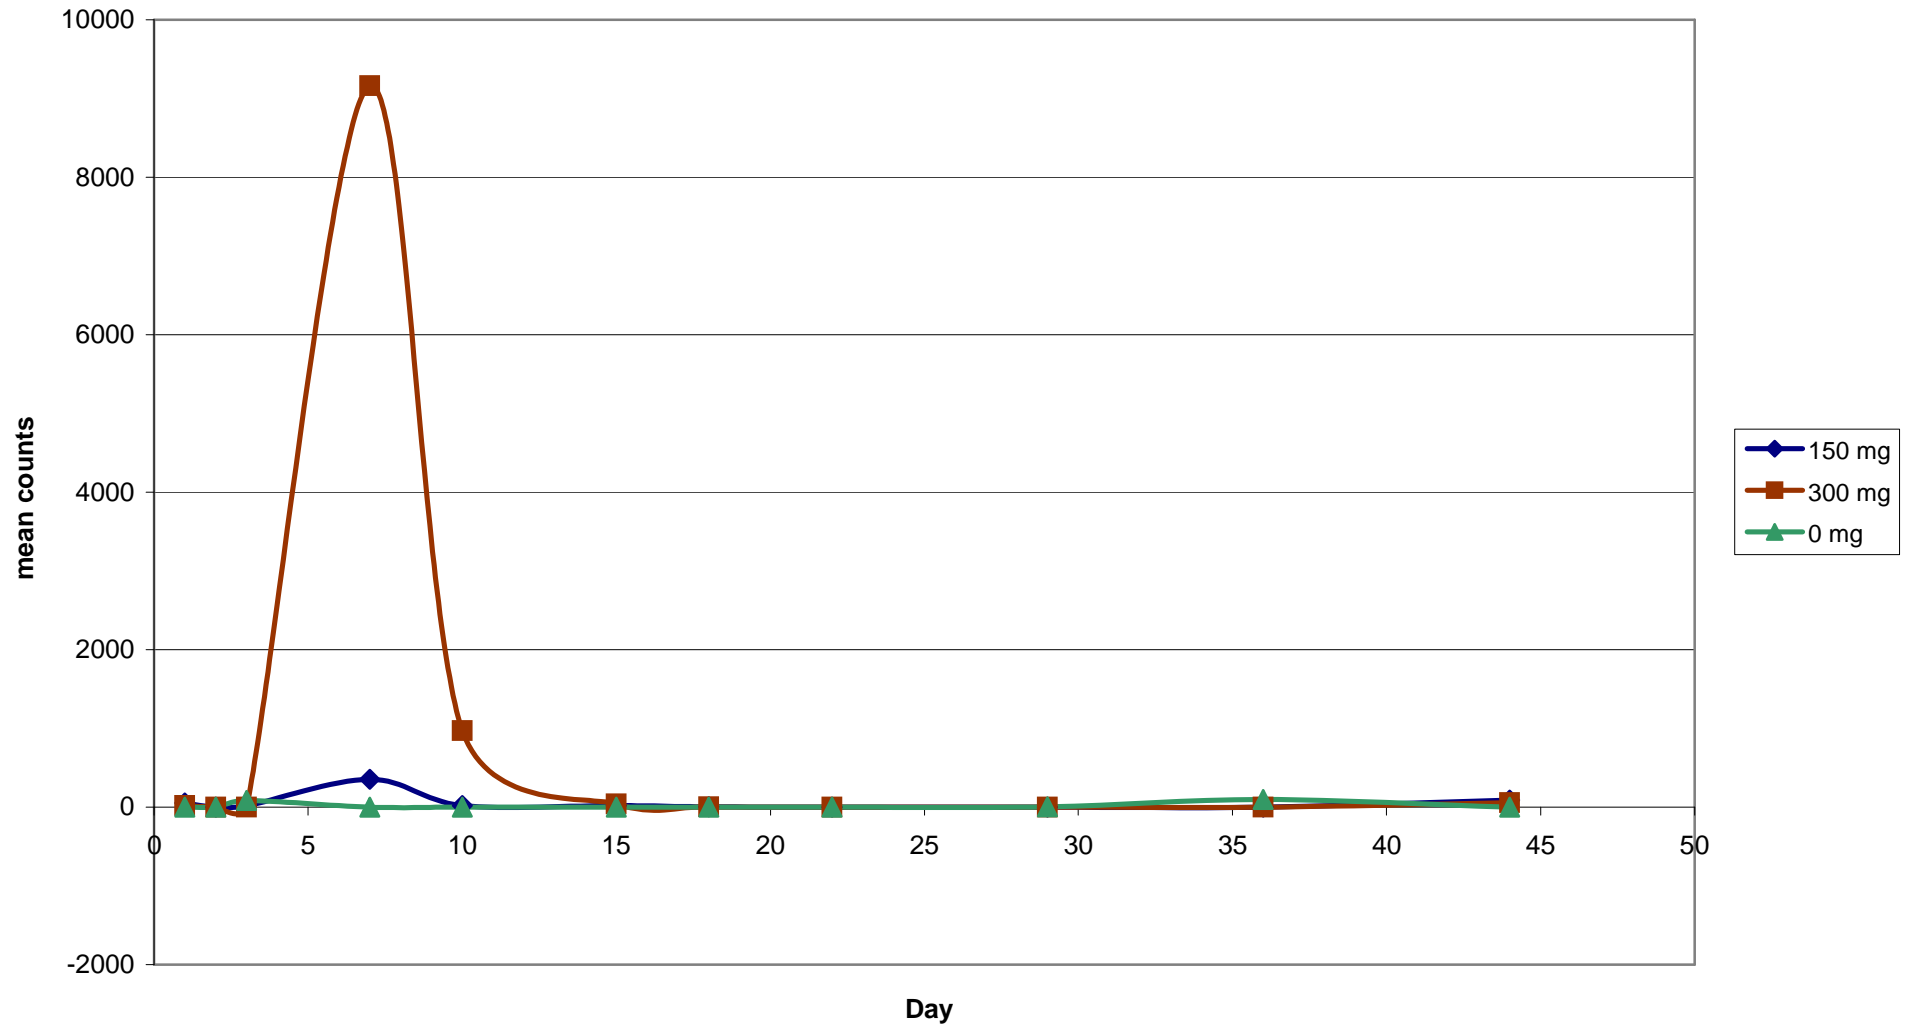

ID 17365

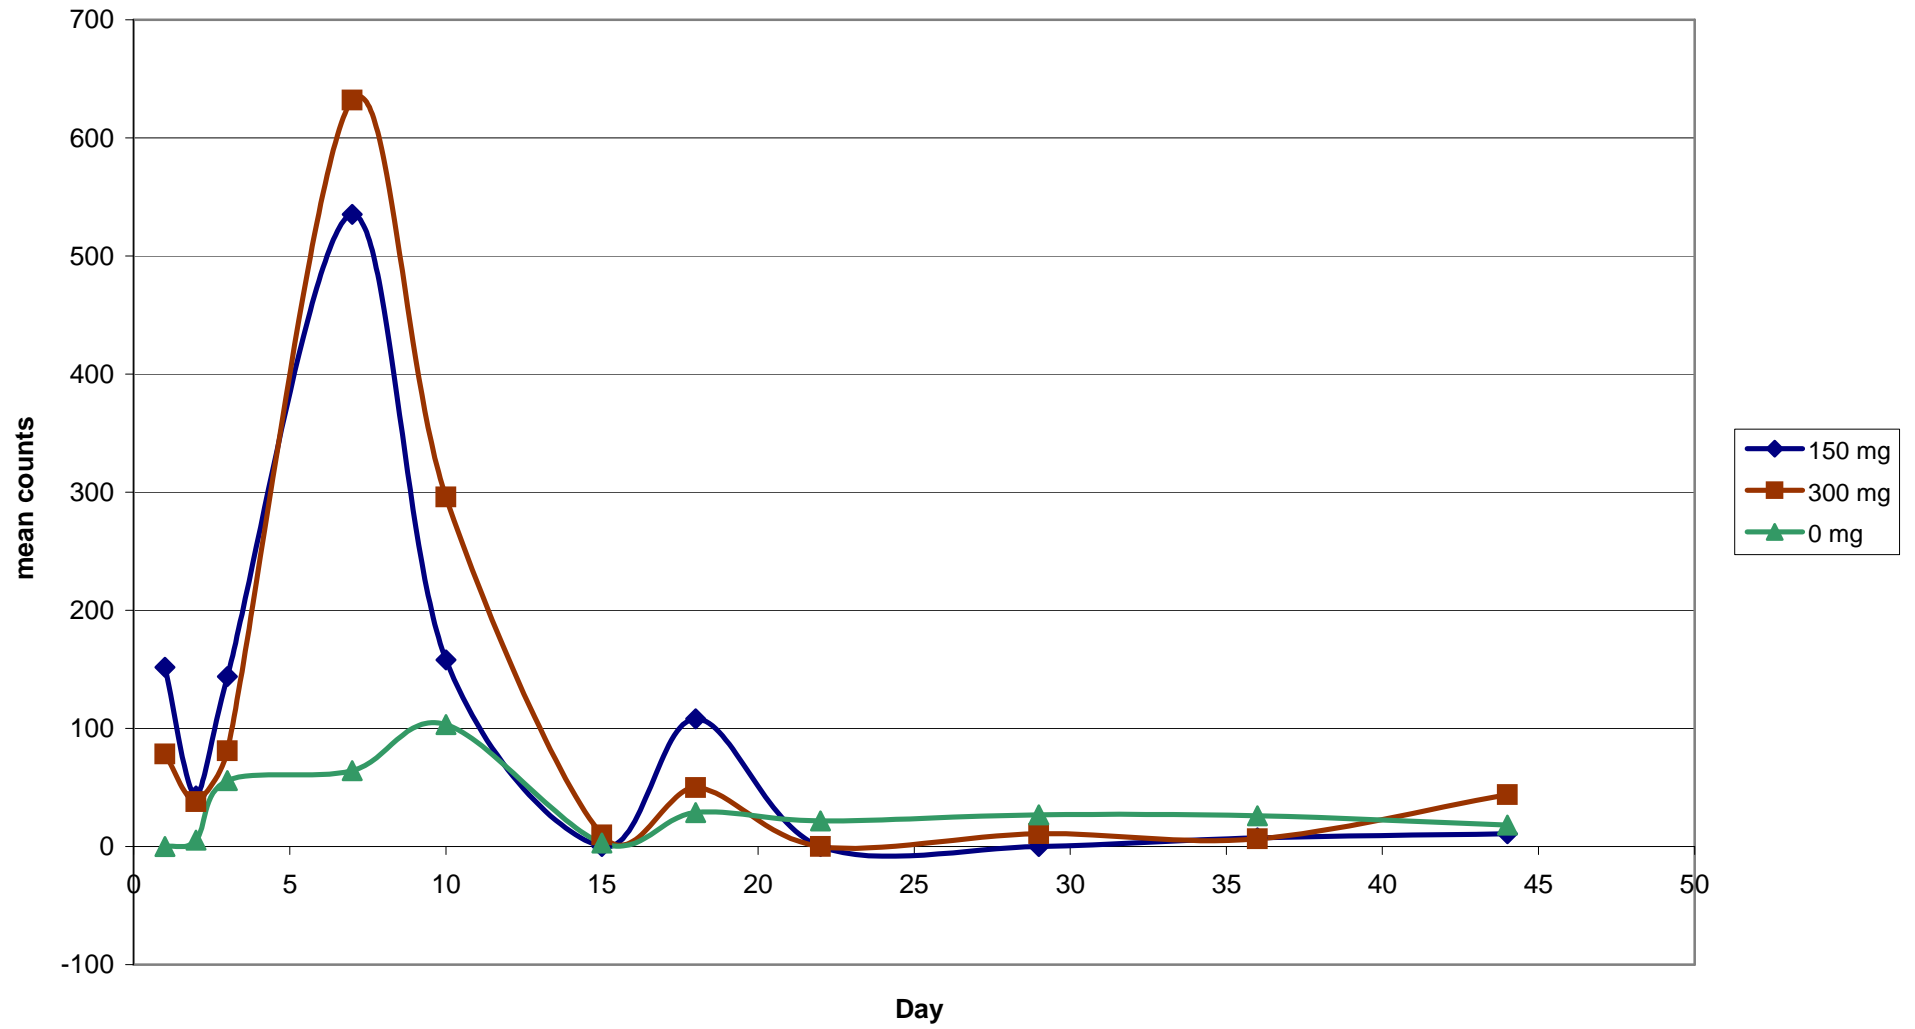

ID 17310

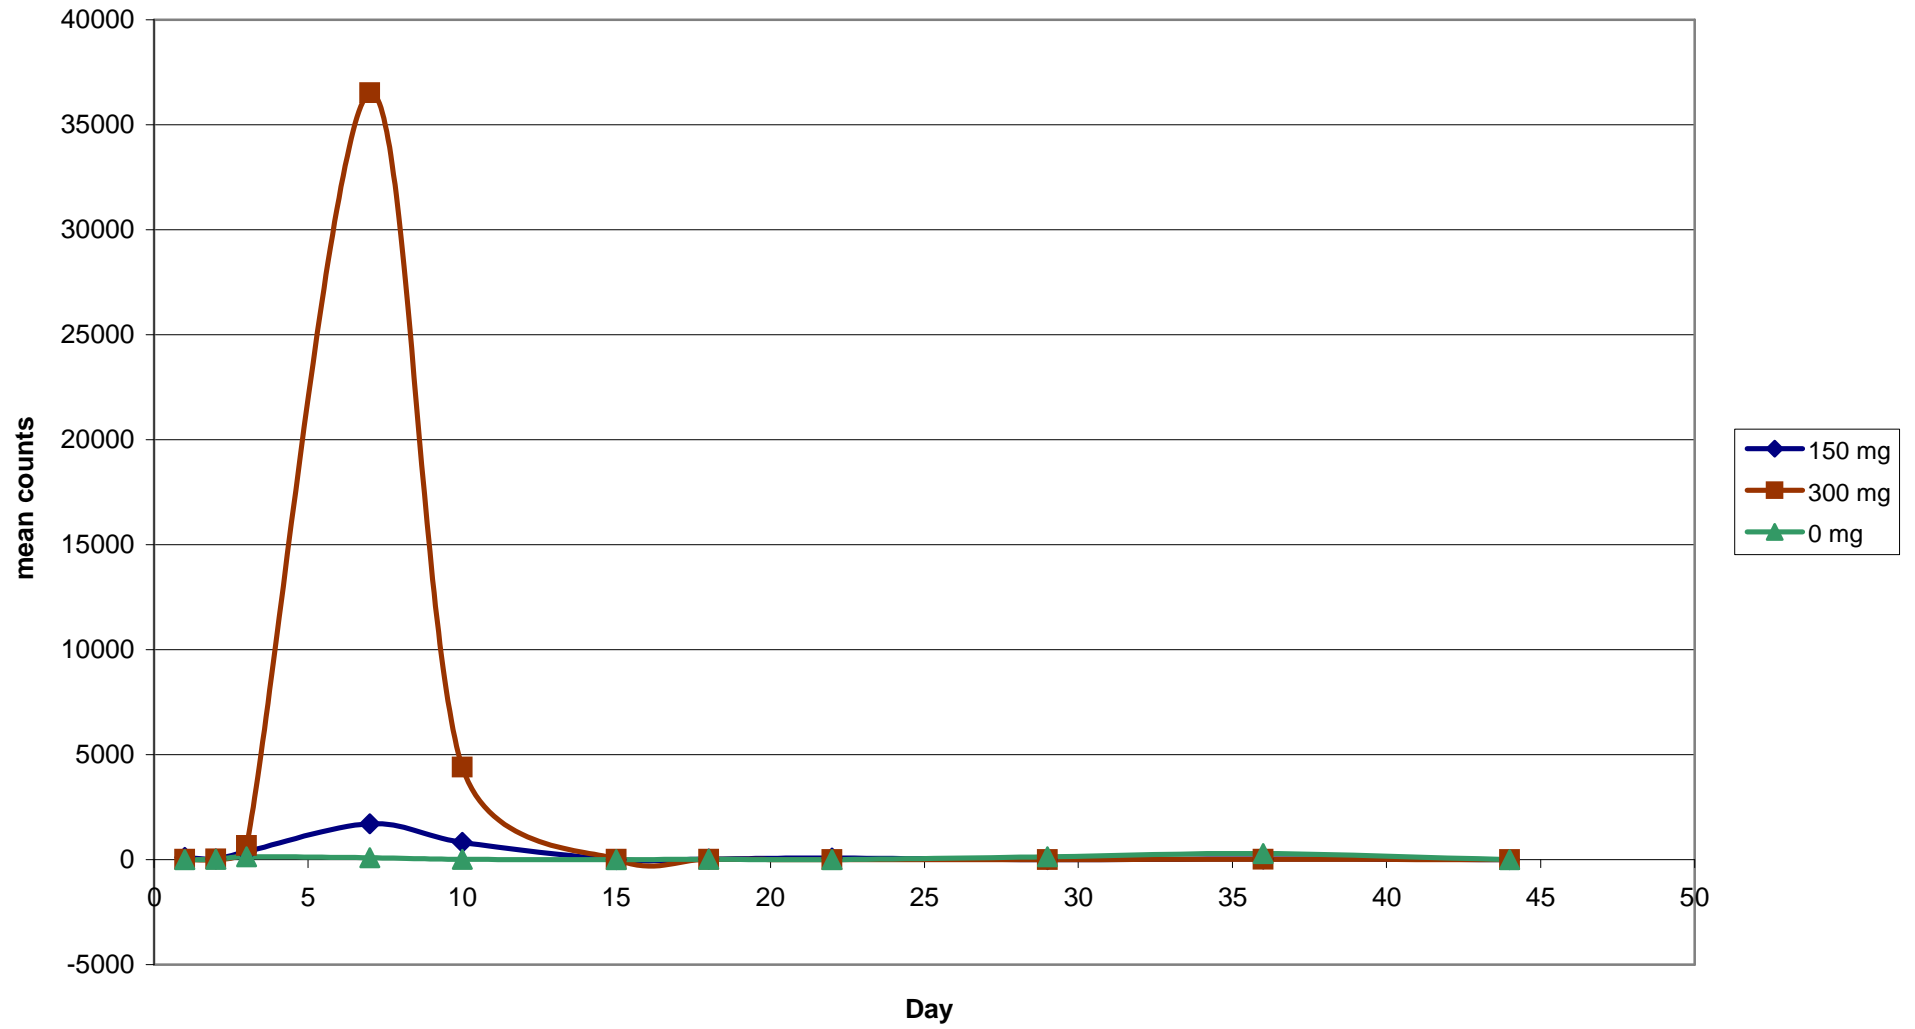

ID 17163

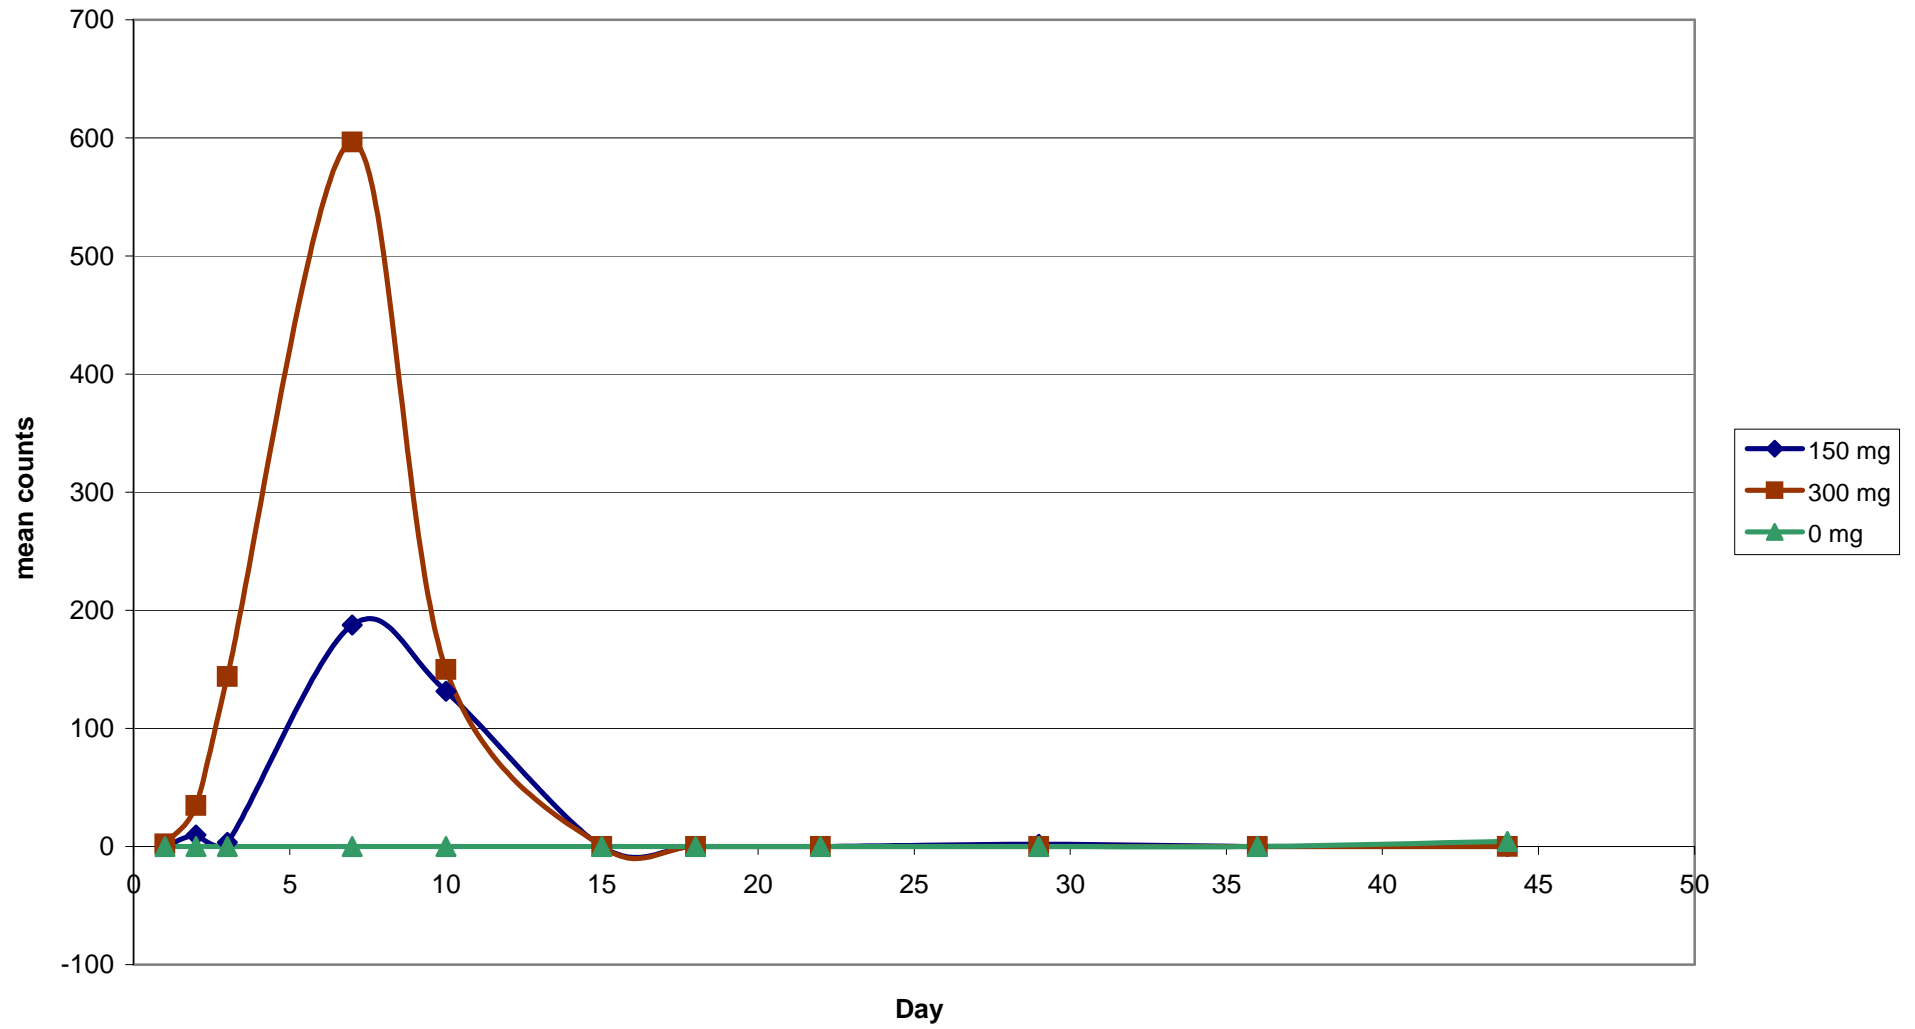



ID 16903

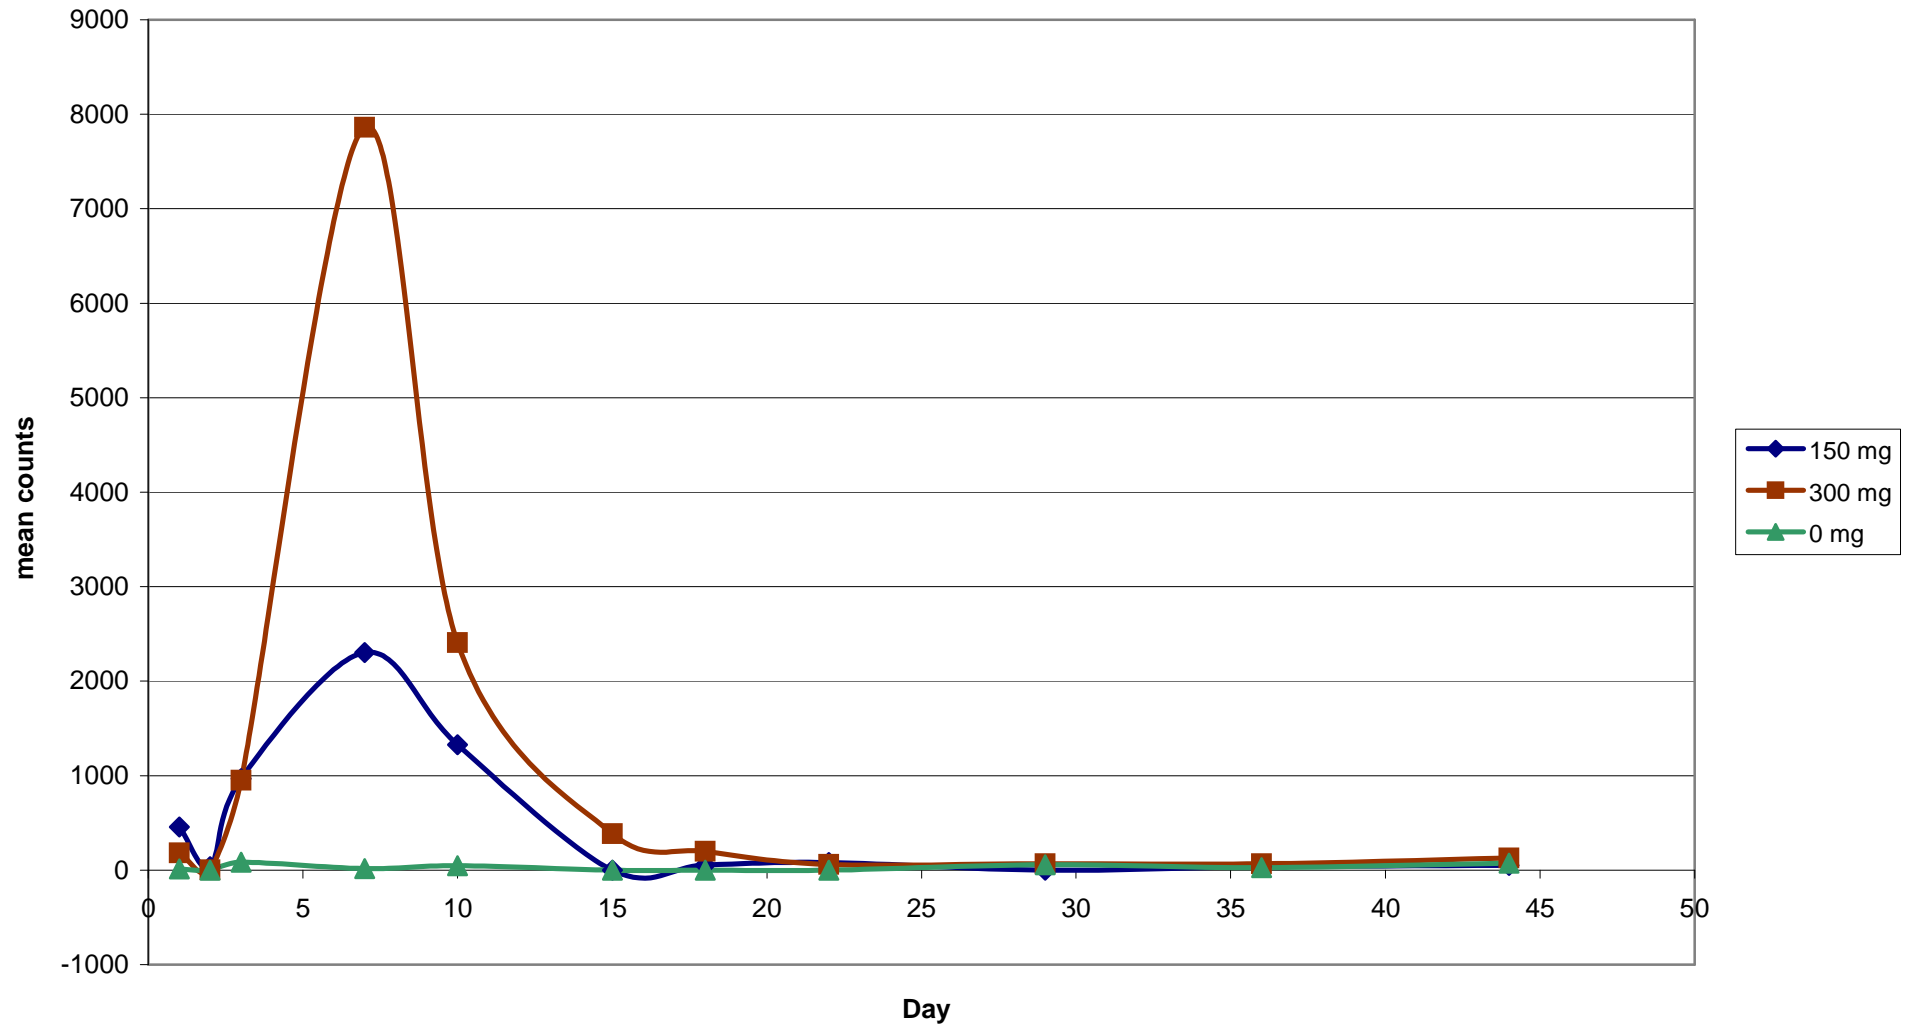

ID 16833

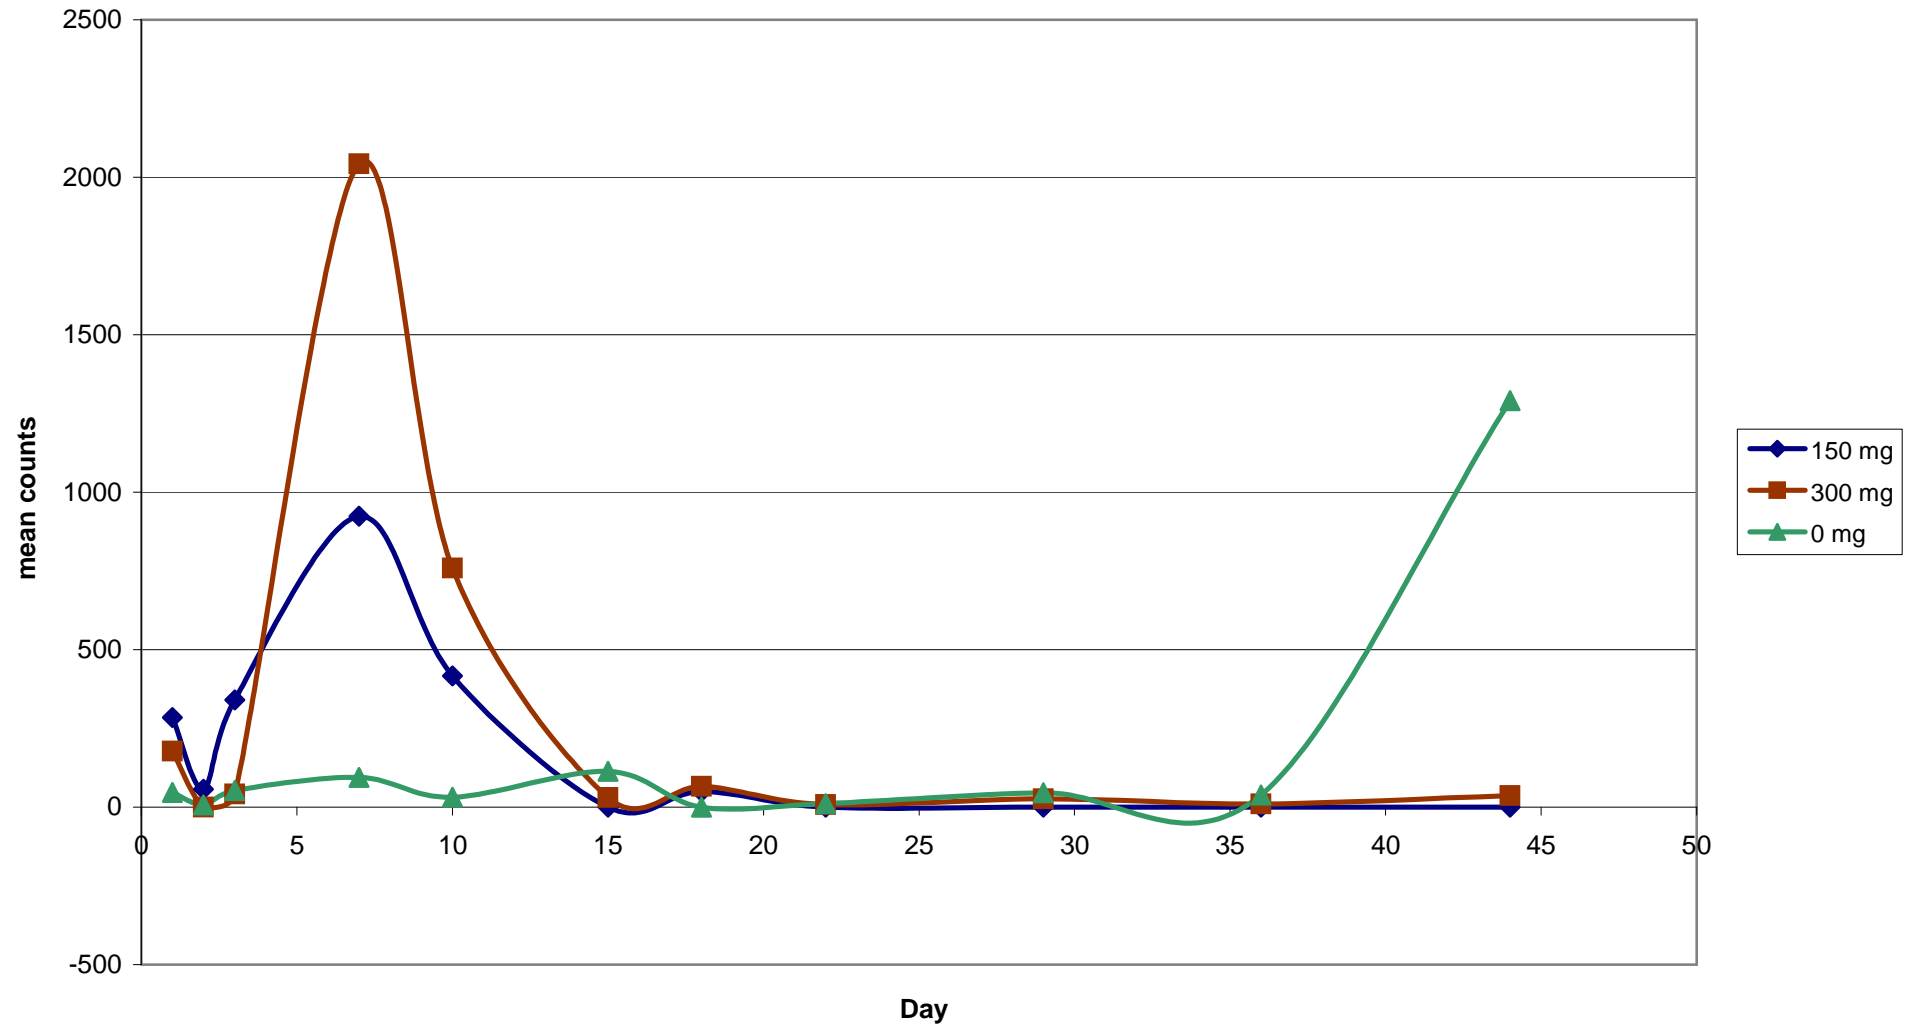

ID 16762

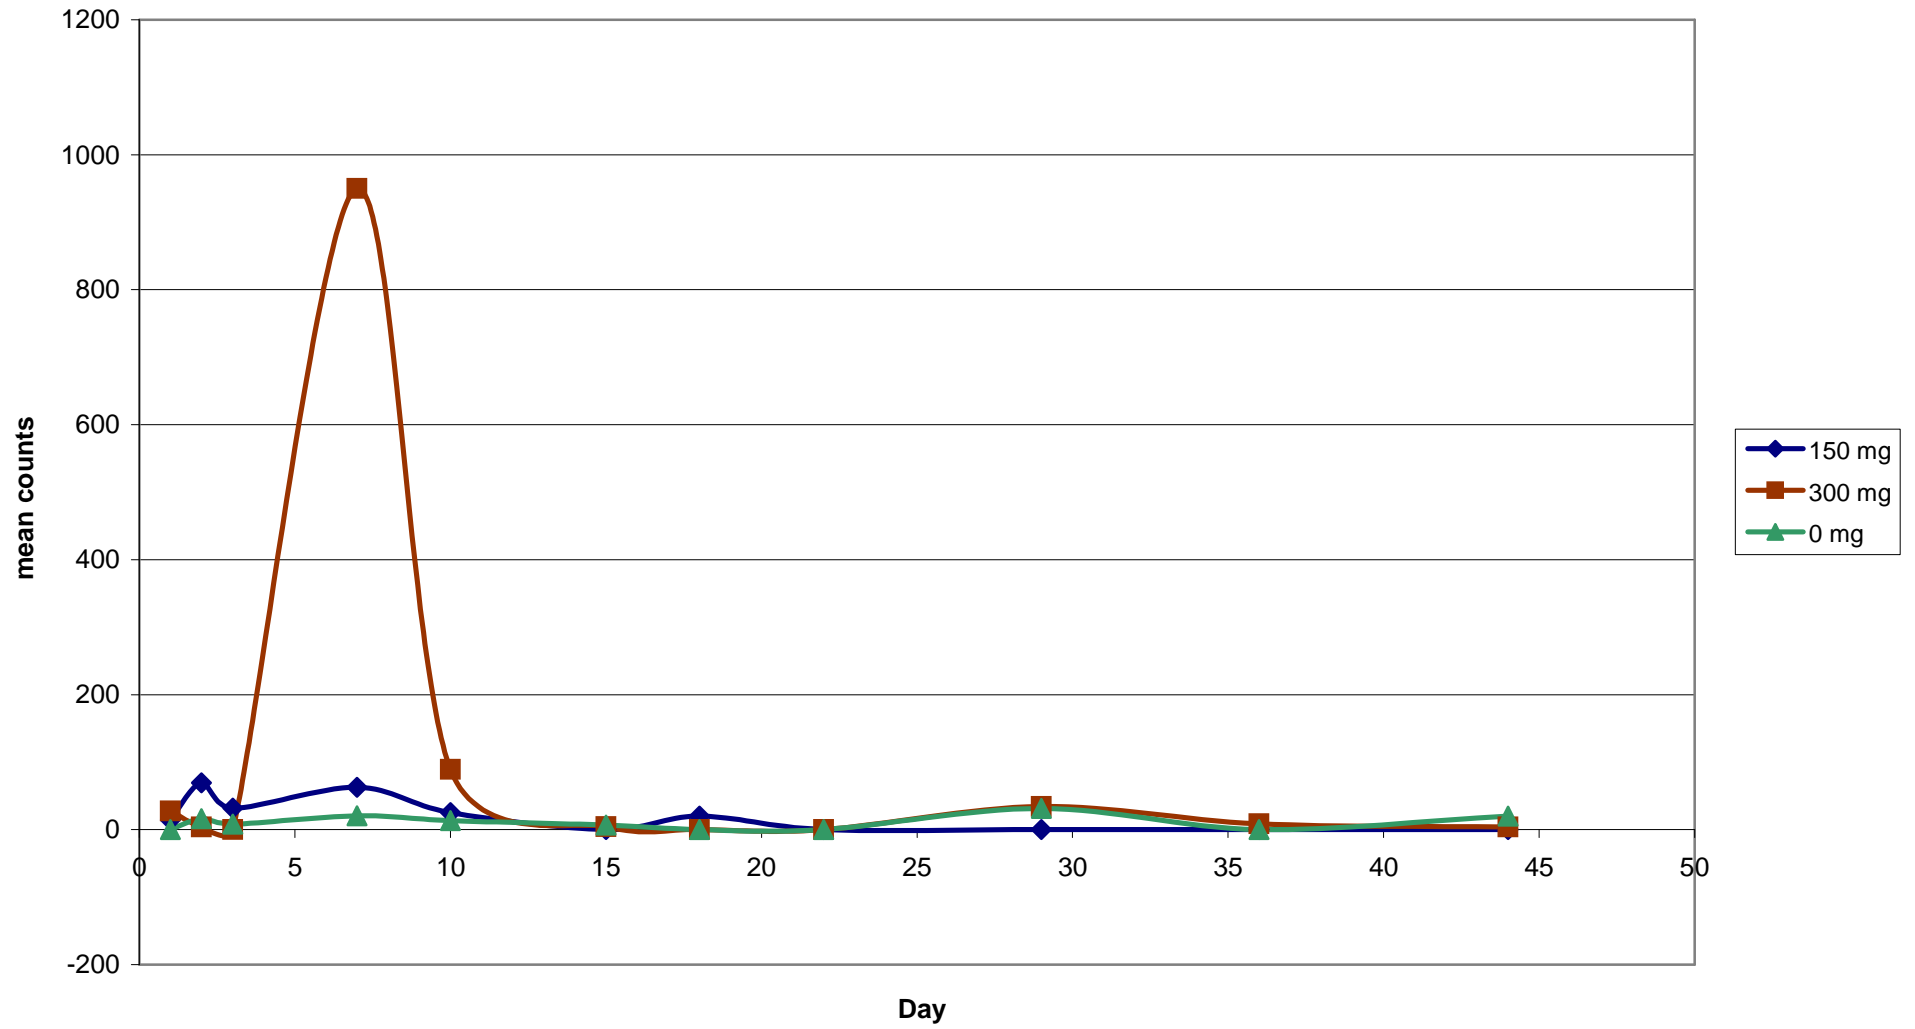

ID 16746

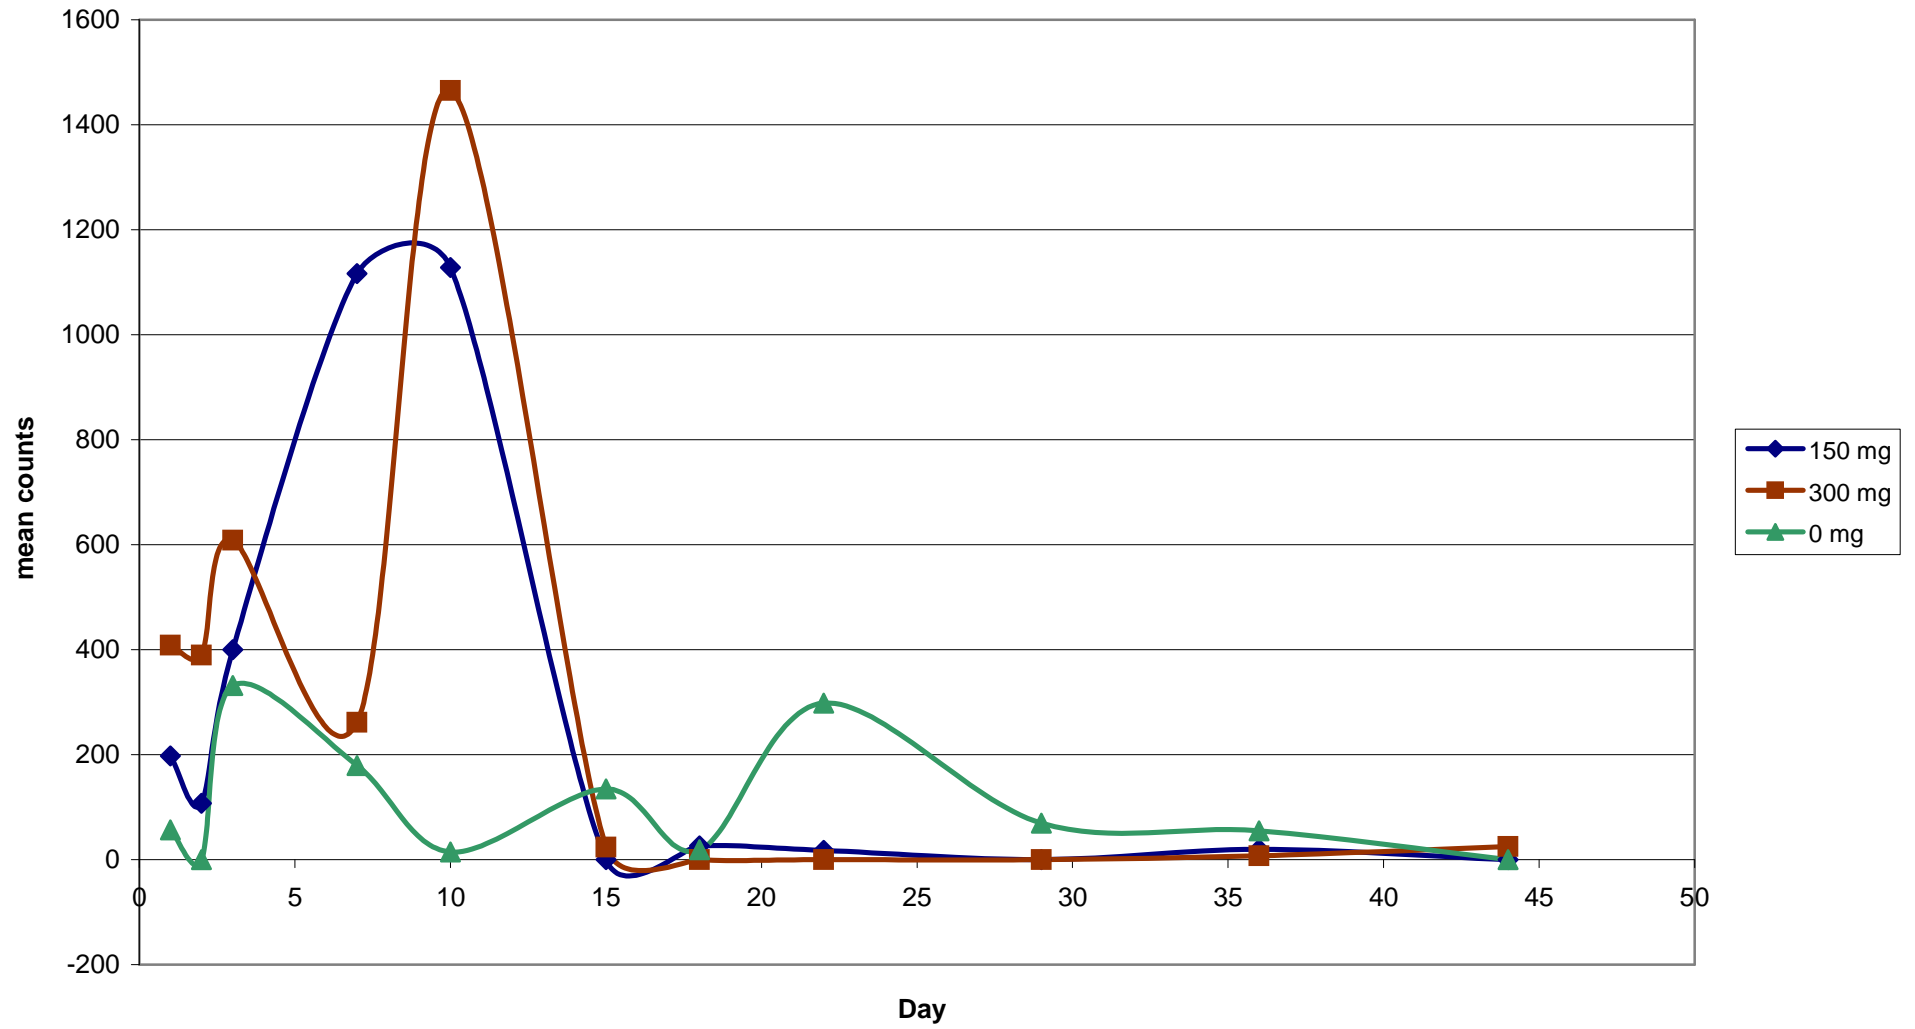

ID 16611

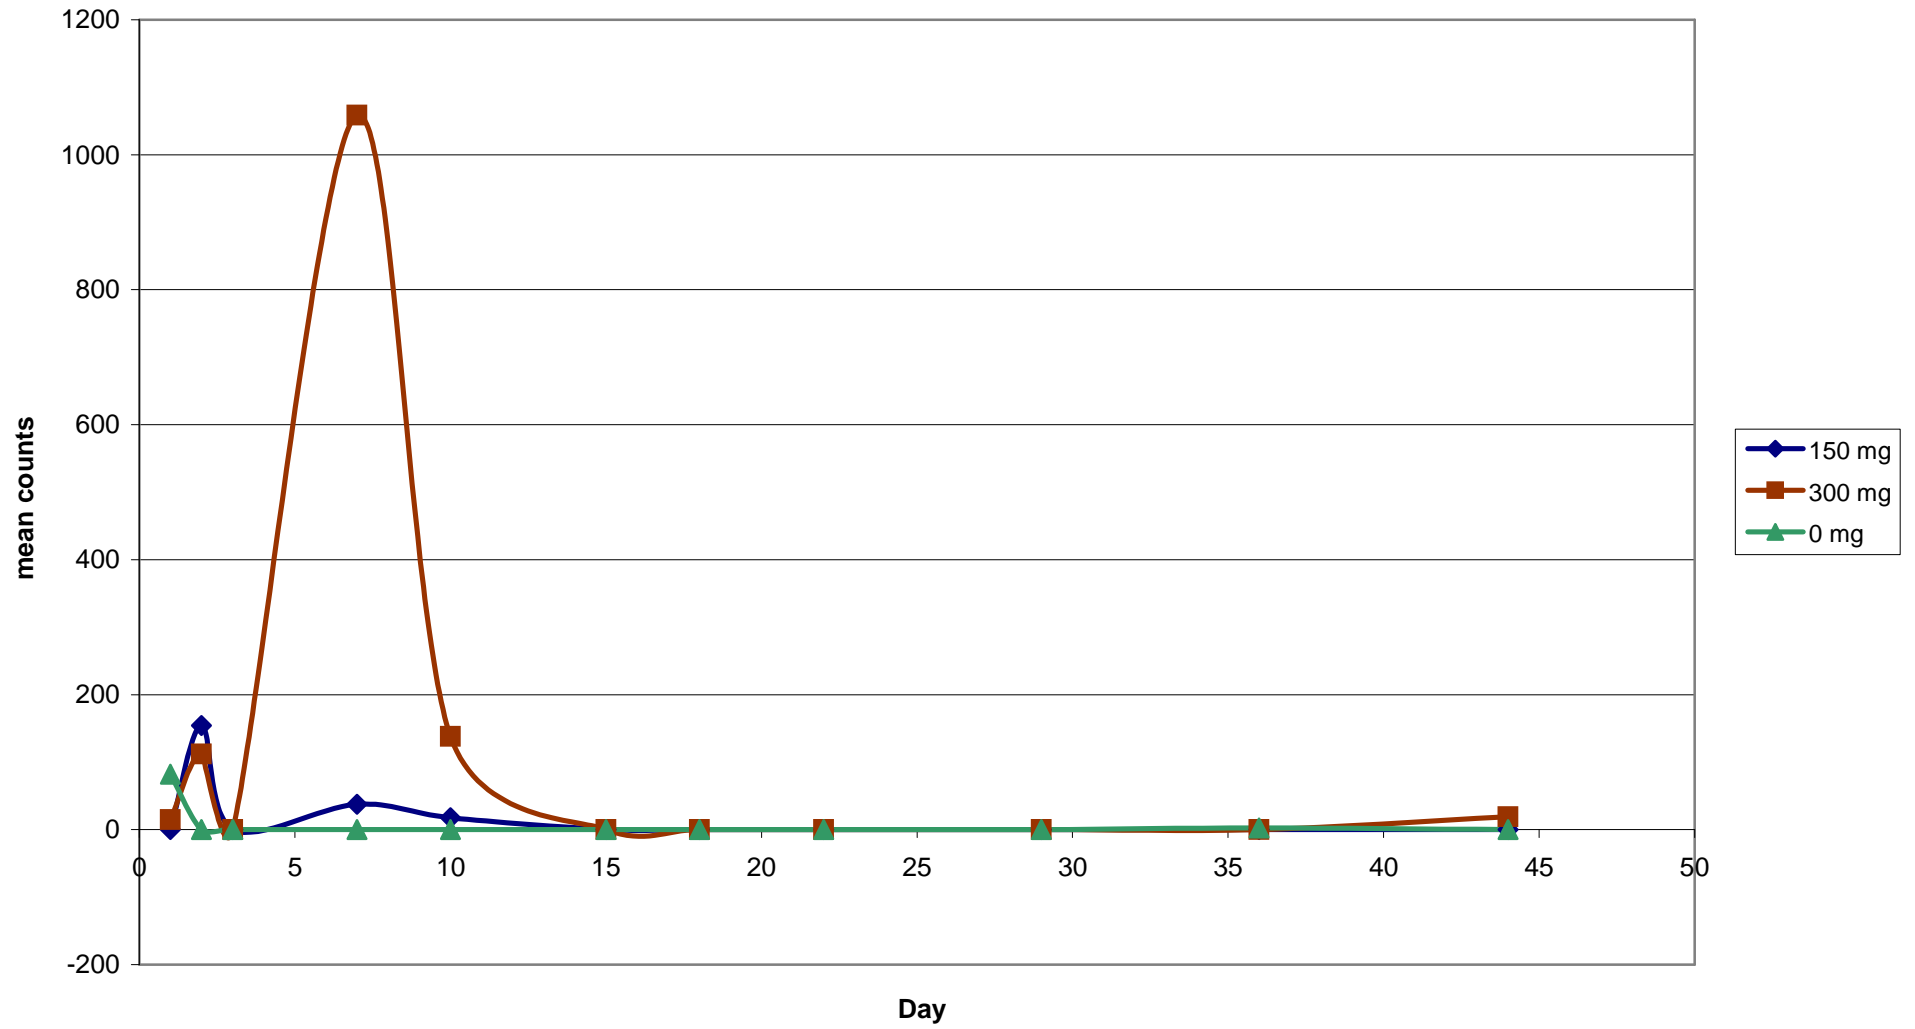

ID 16433

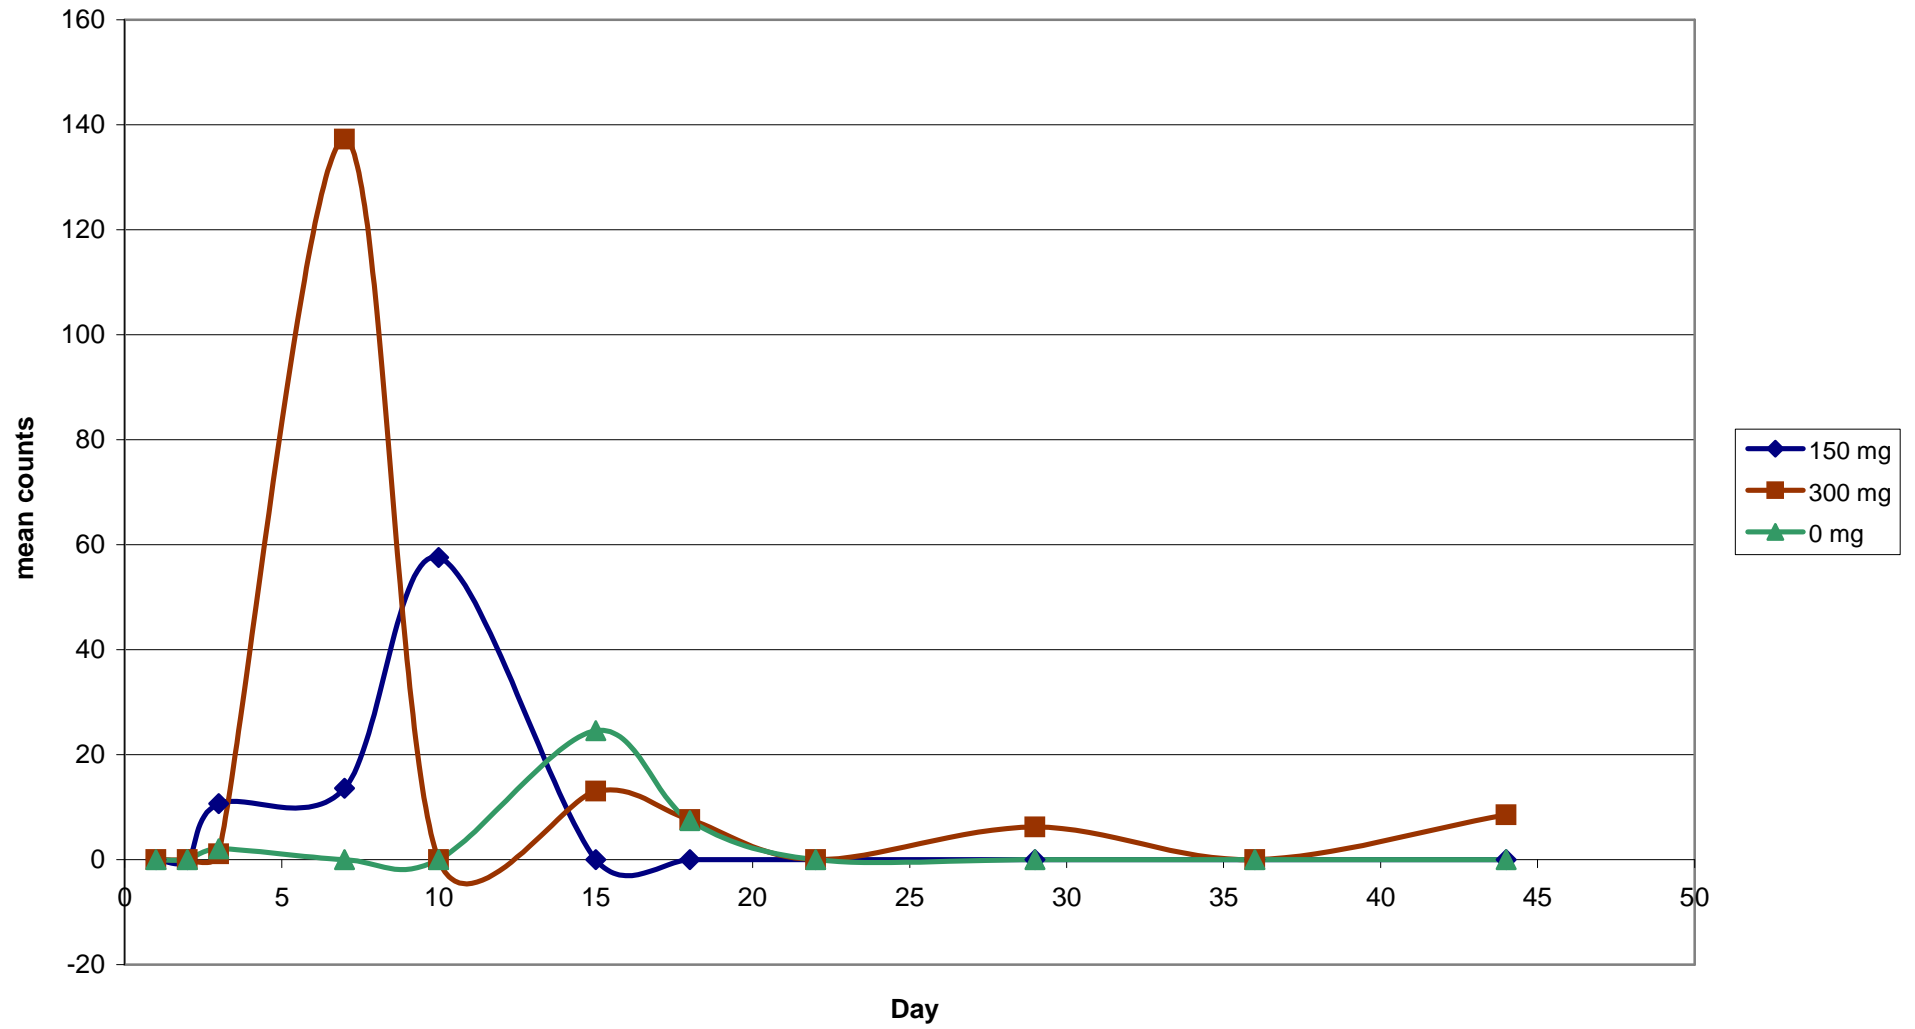

ID 16402

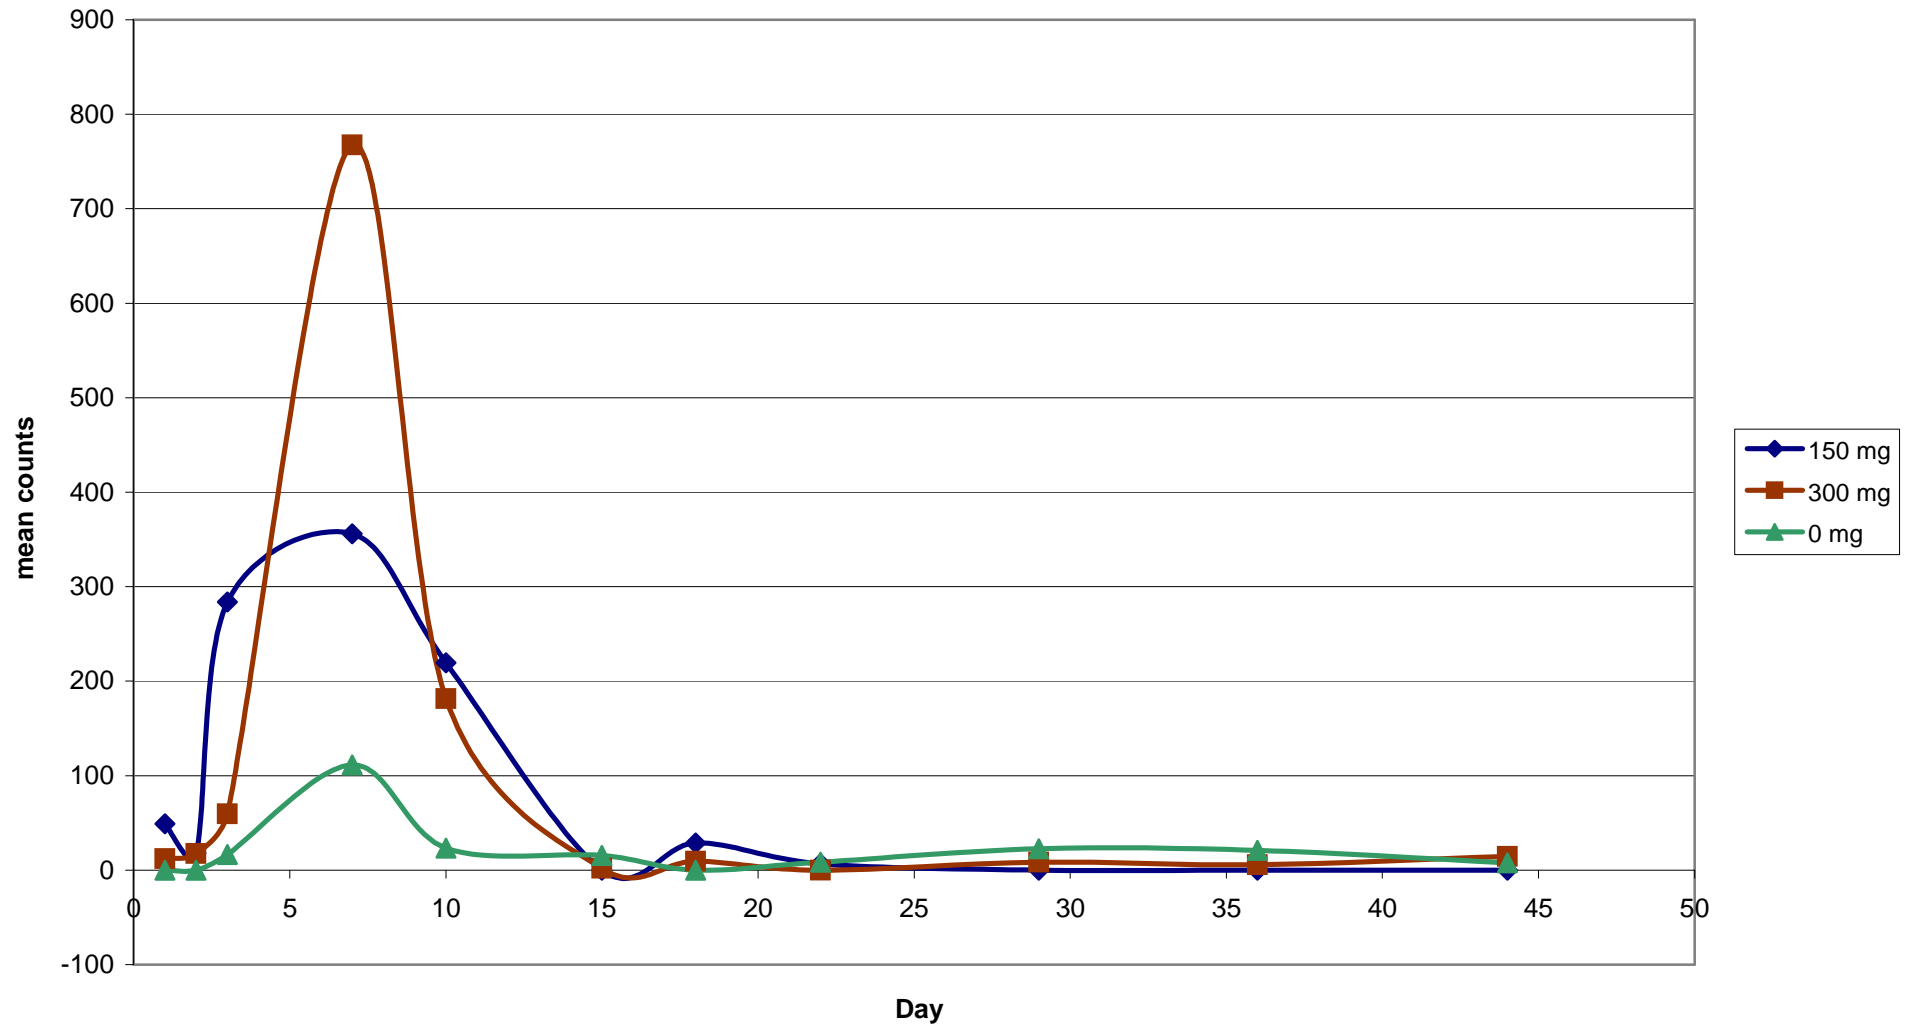

ID 16105

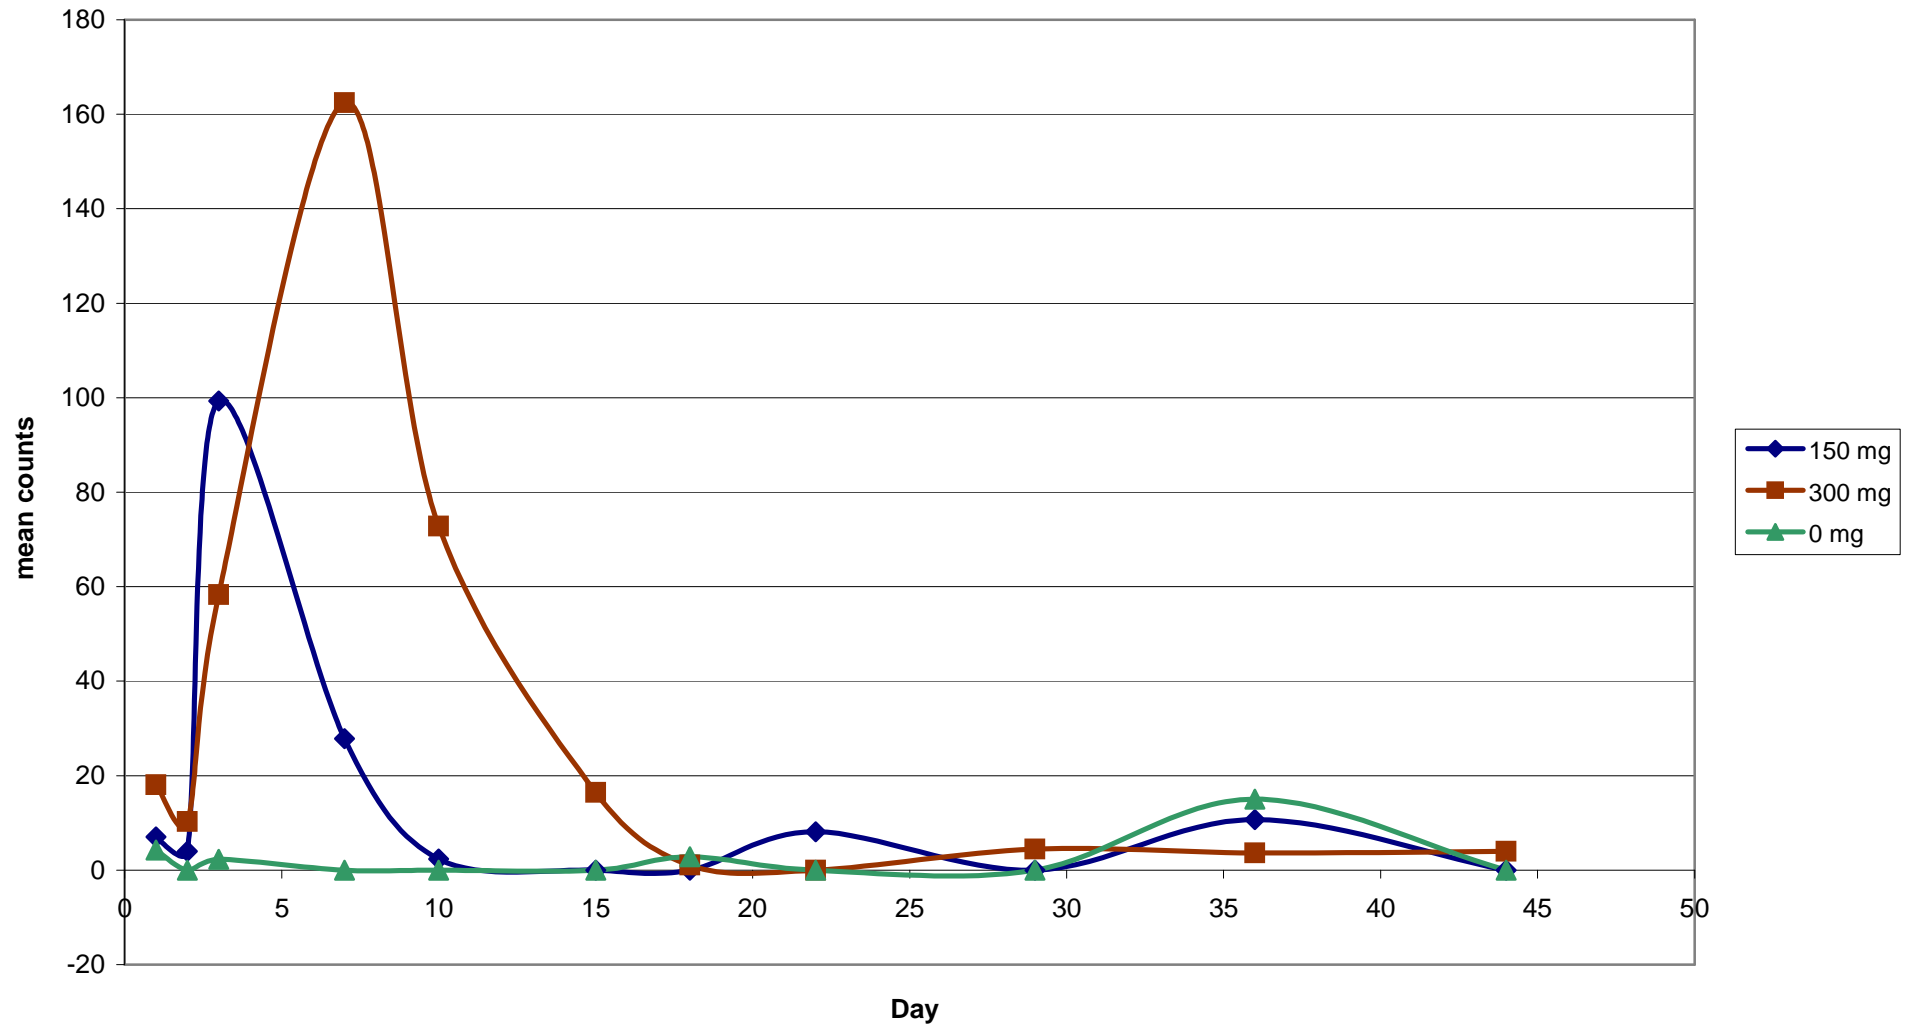



ID 15991

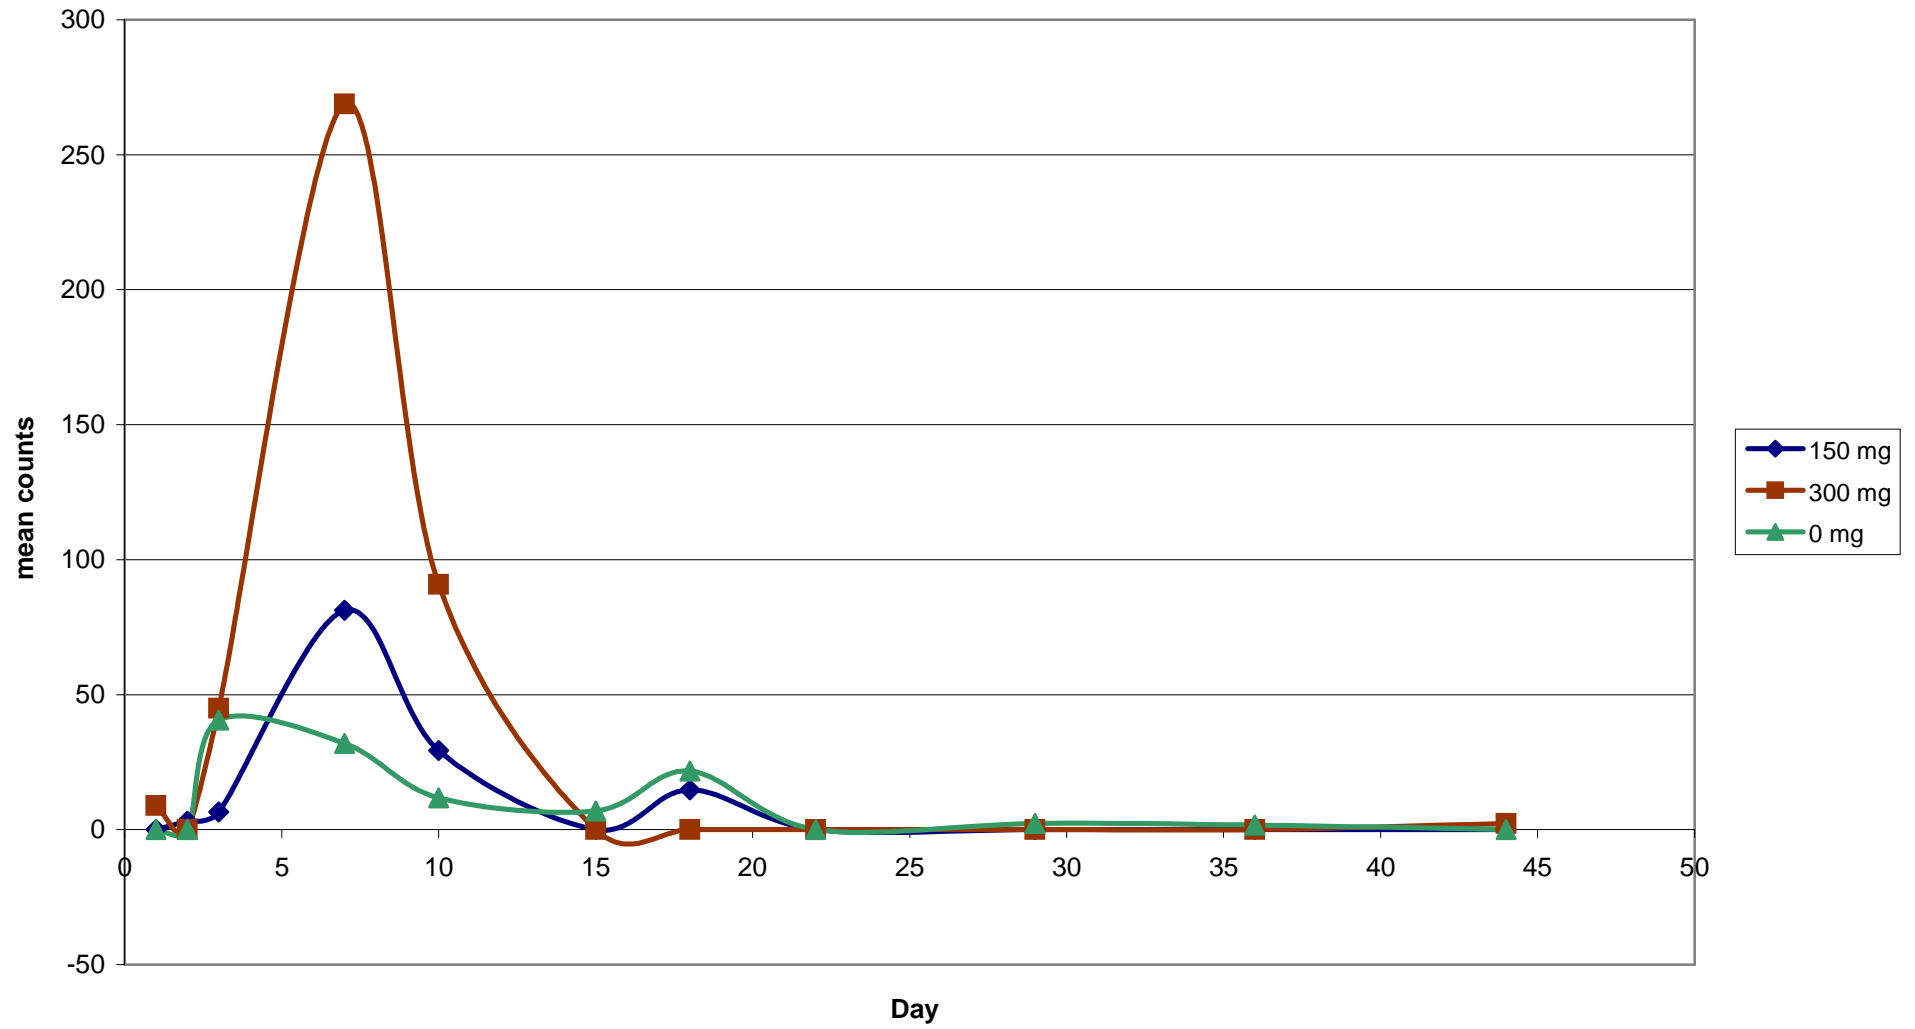

ID 15942

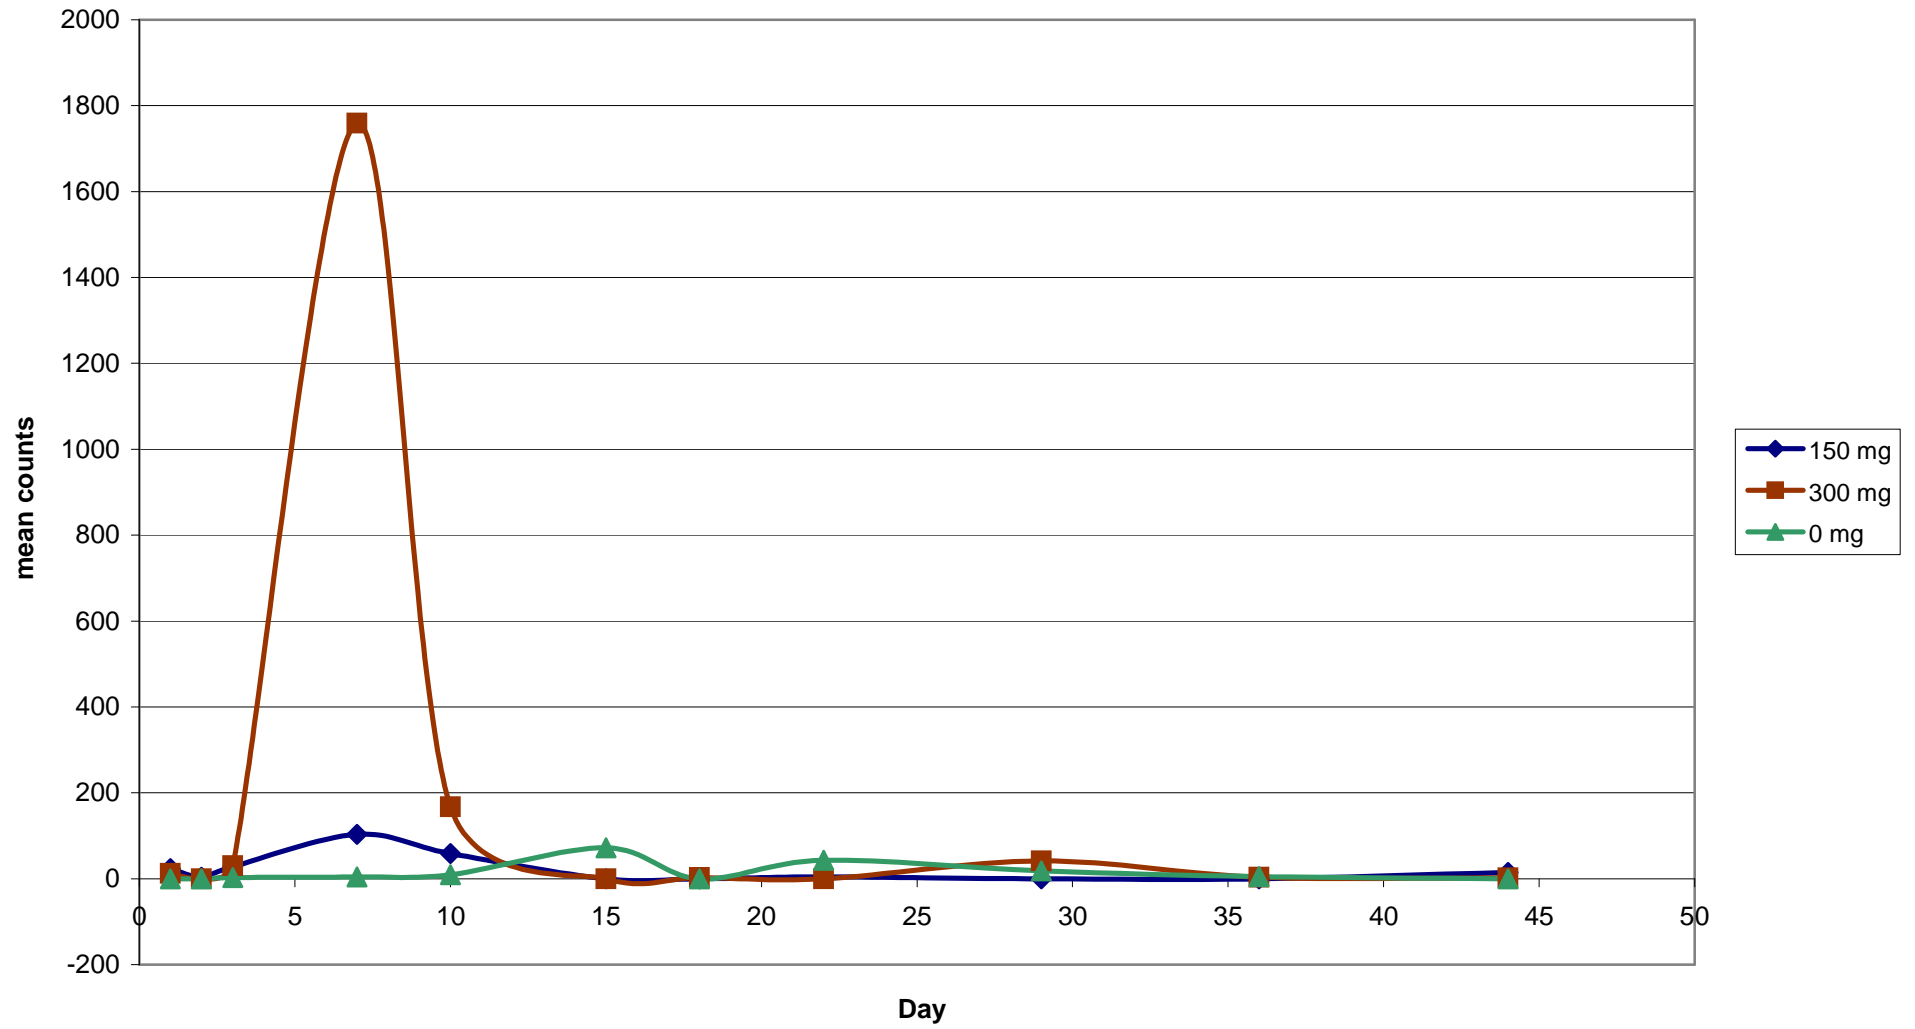

ID 15738

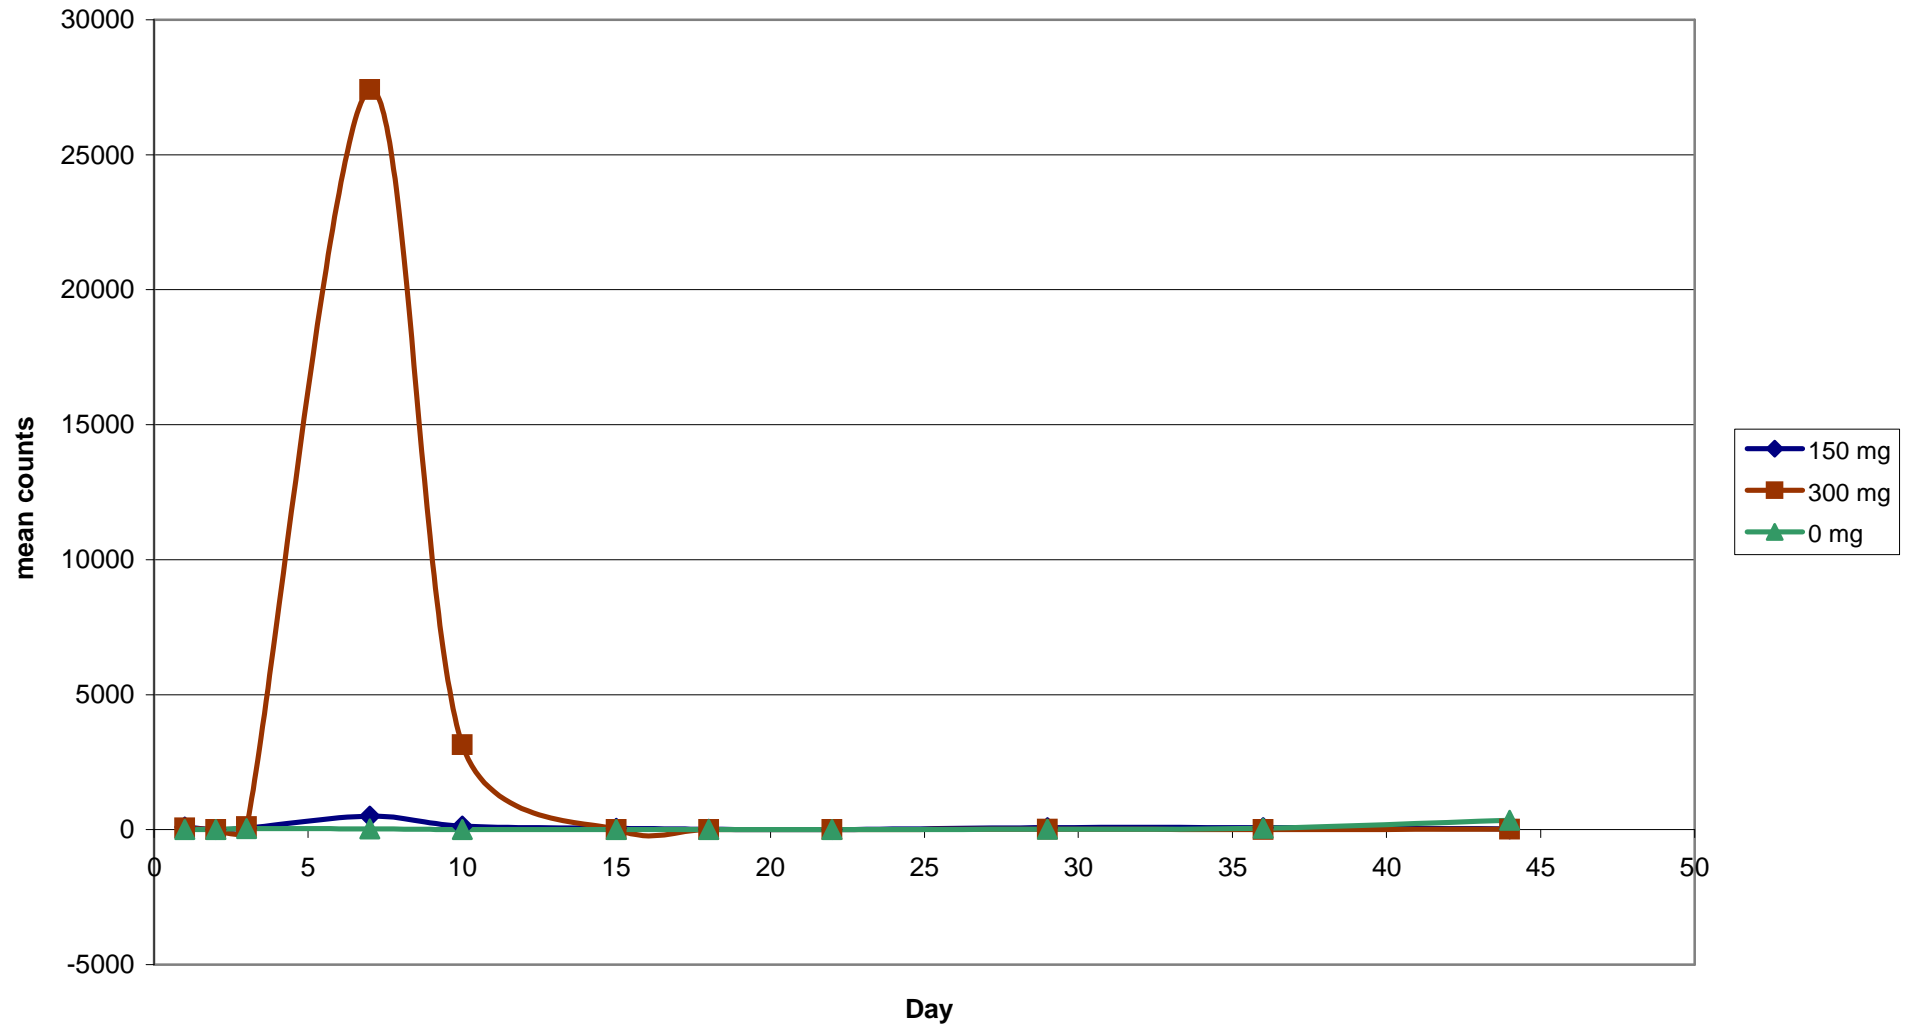

ID 15611

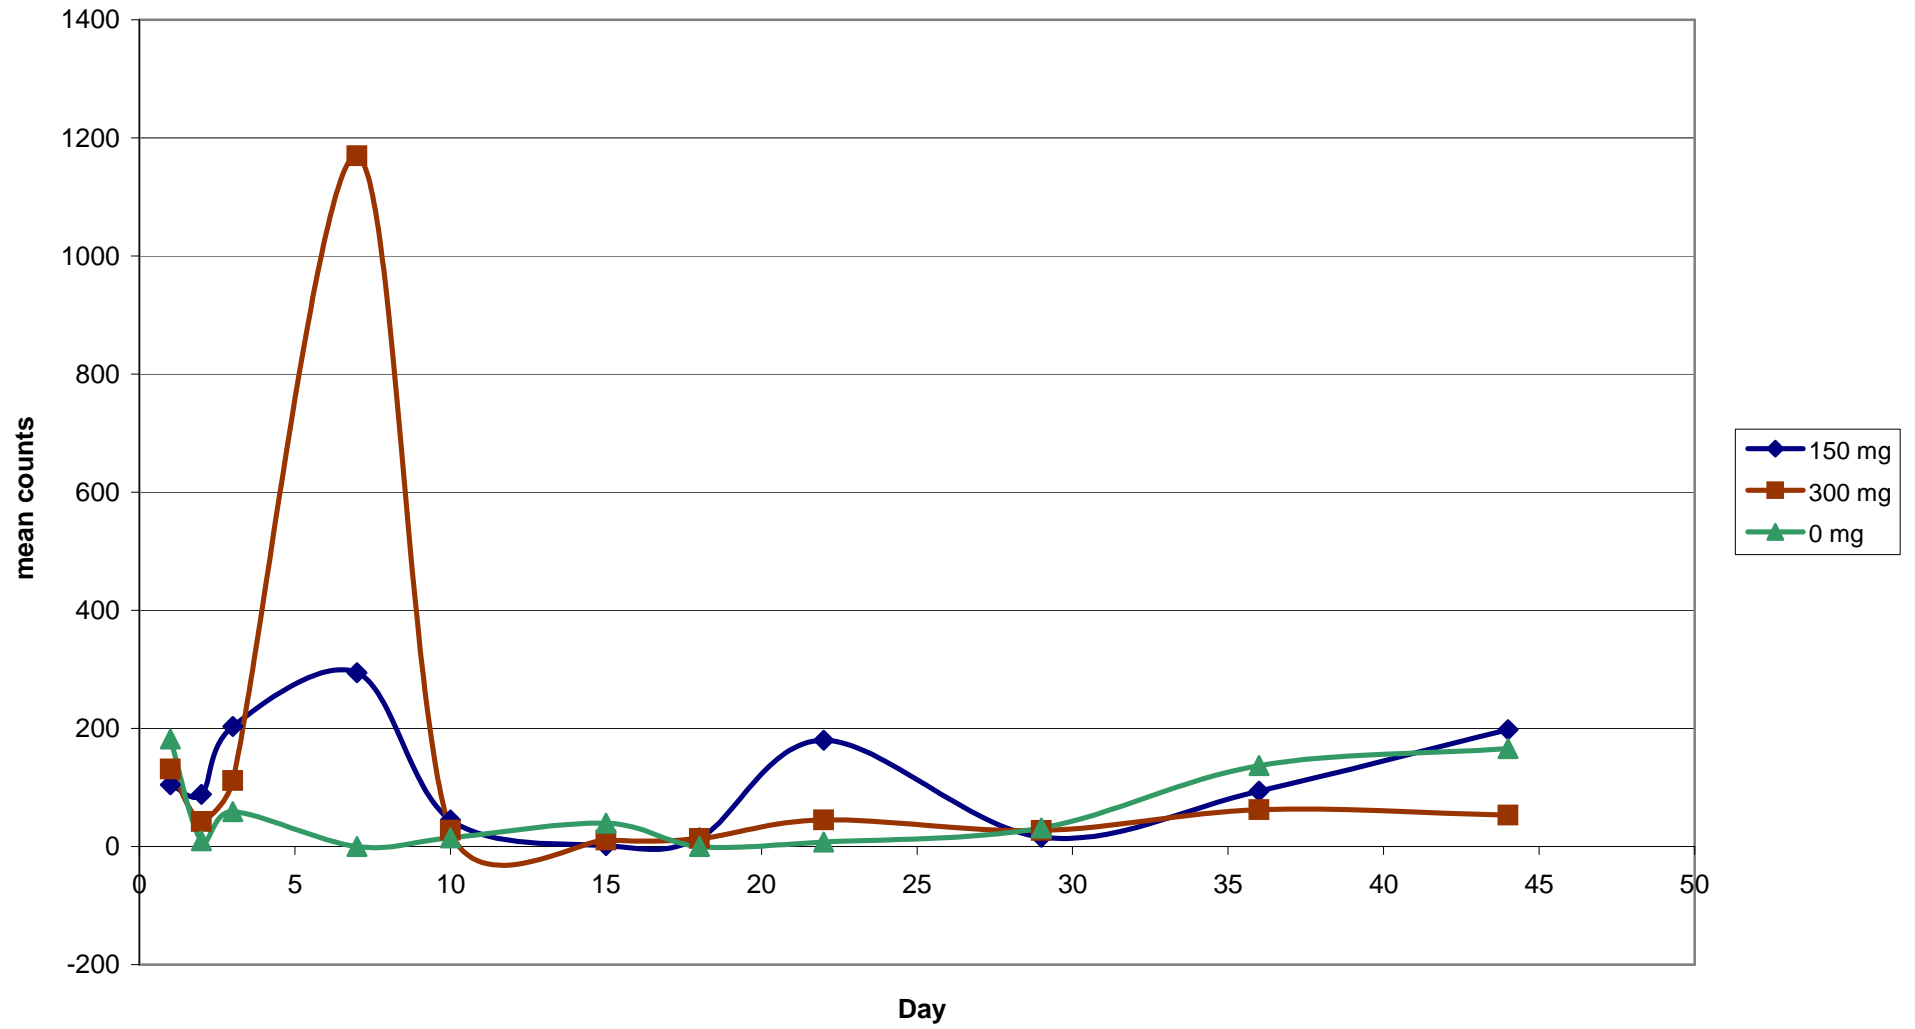

ID 15579

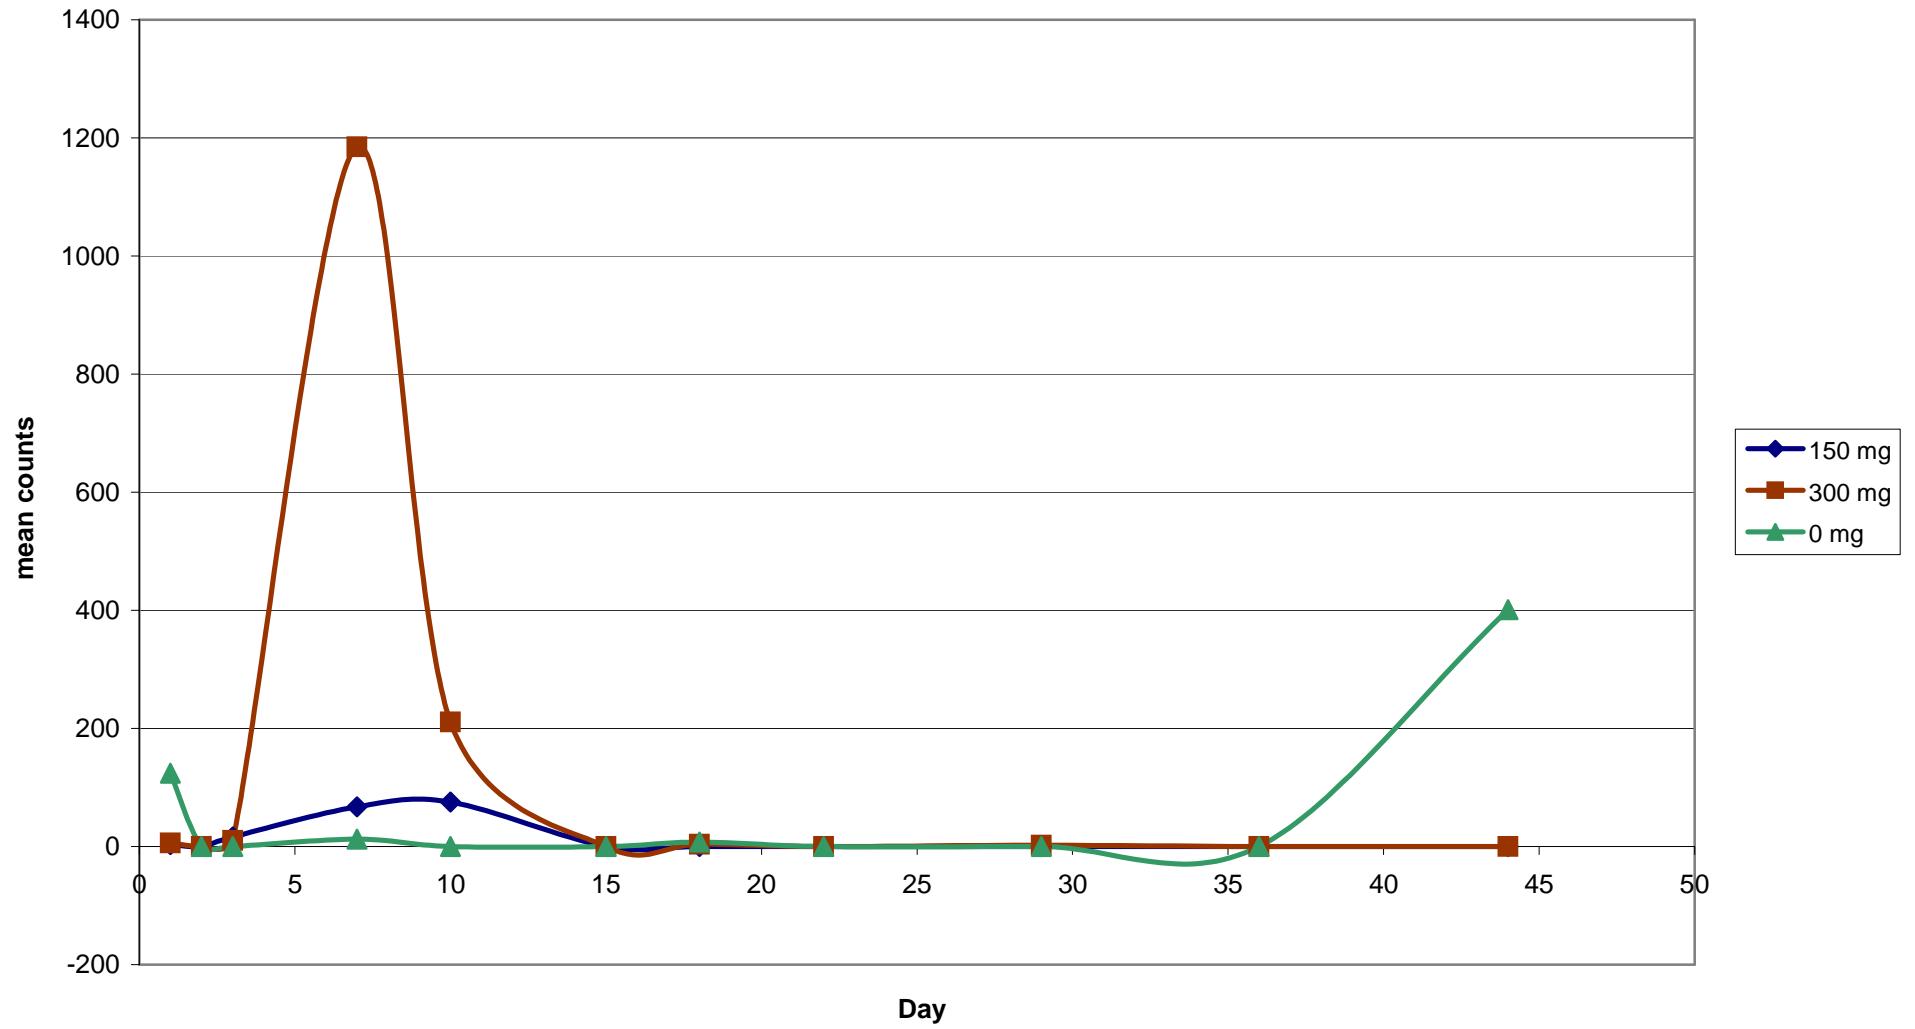

ID 15440

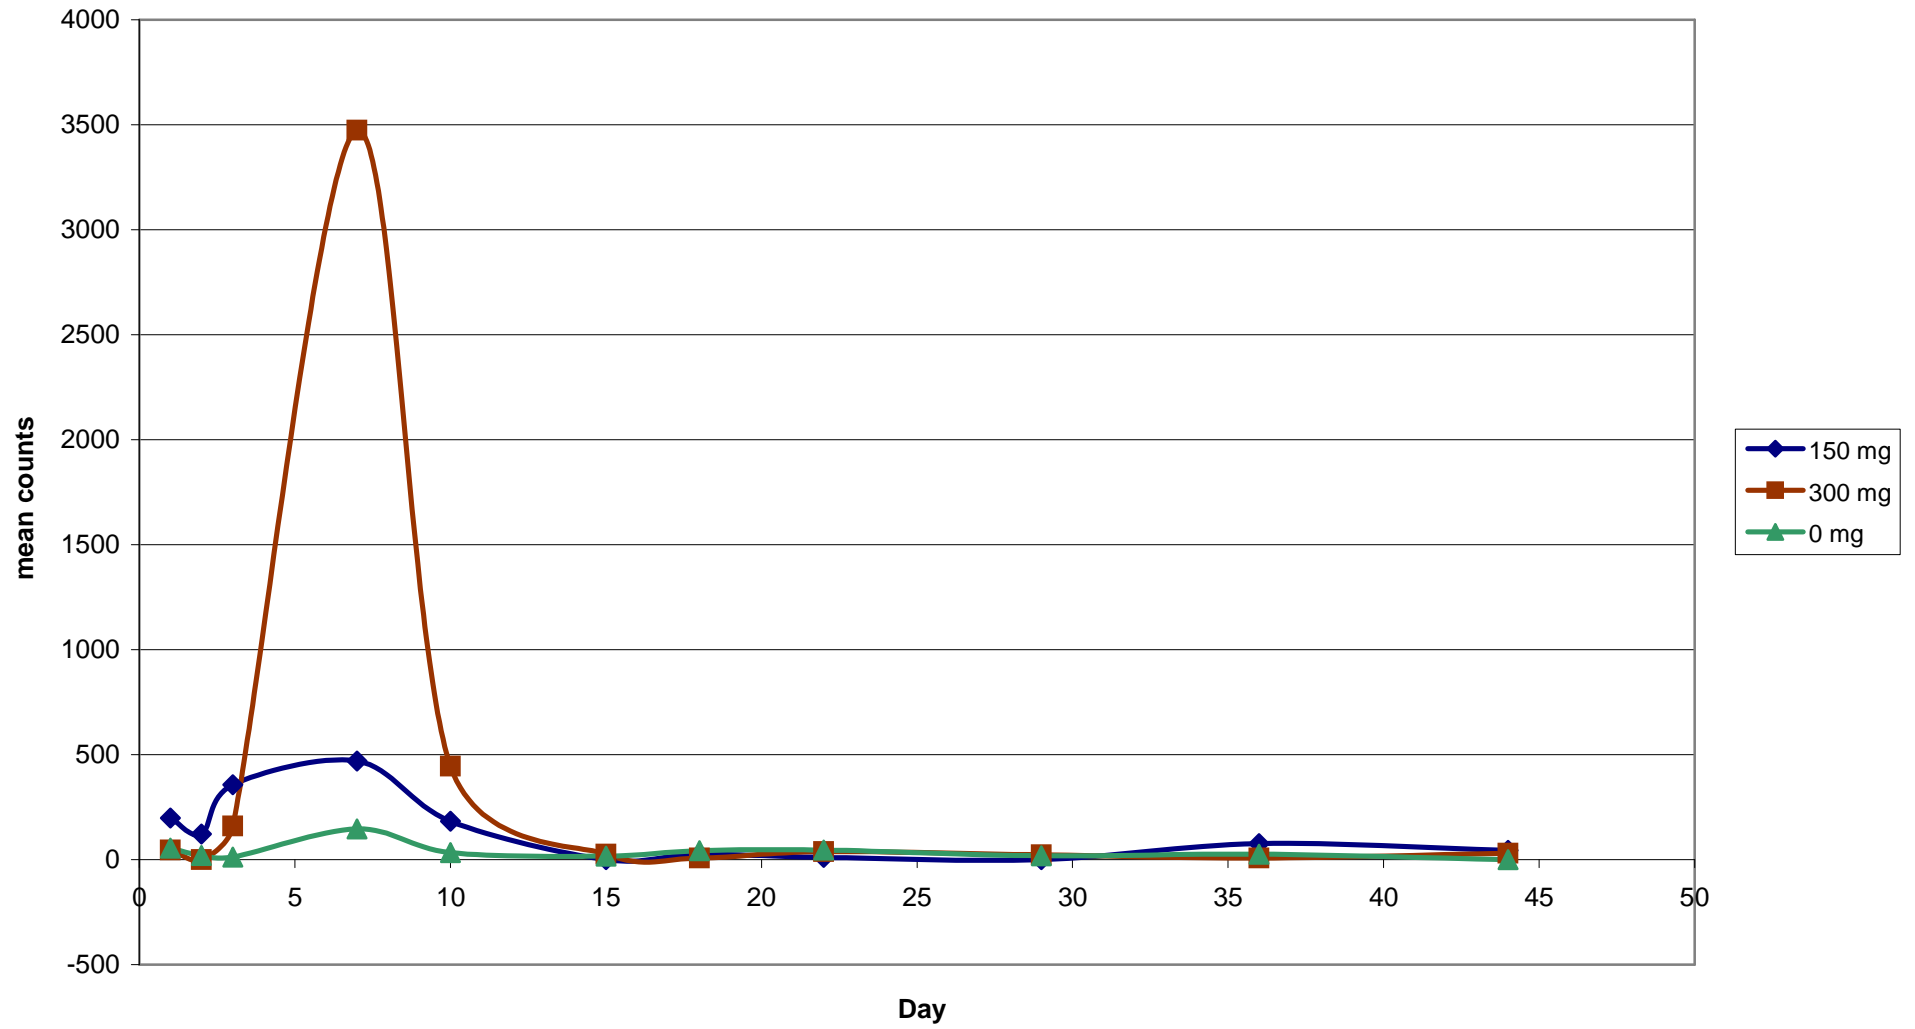

ID 15042

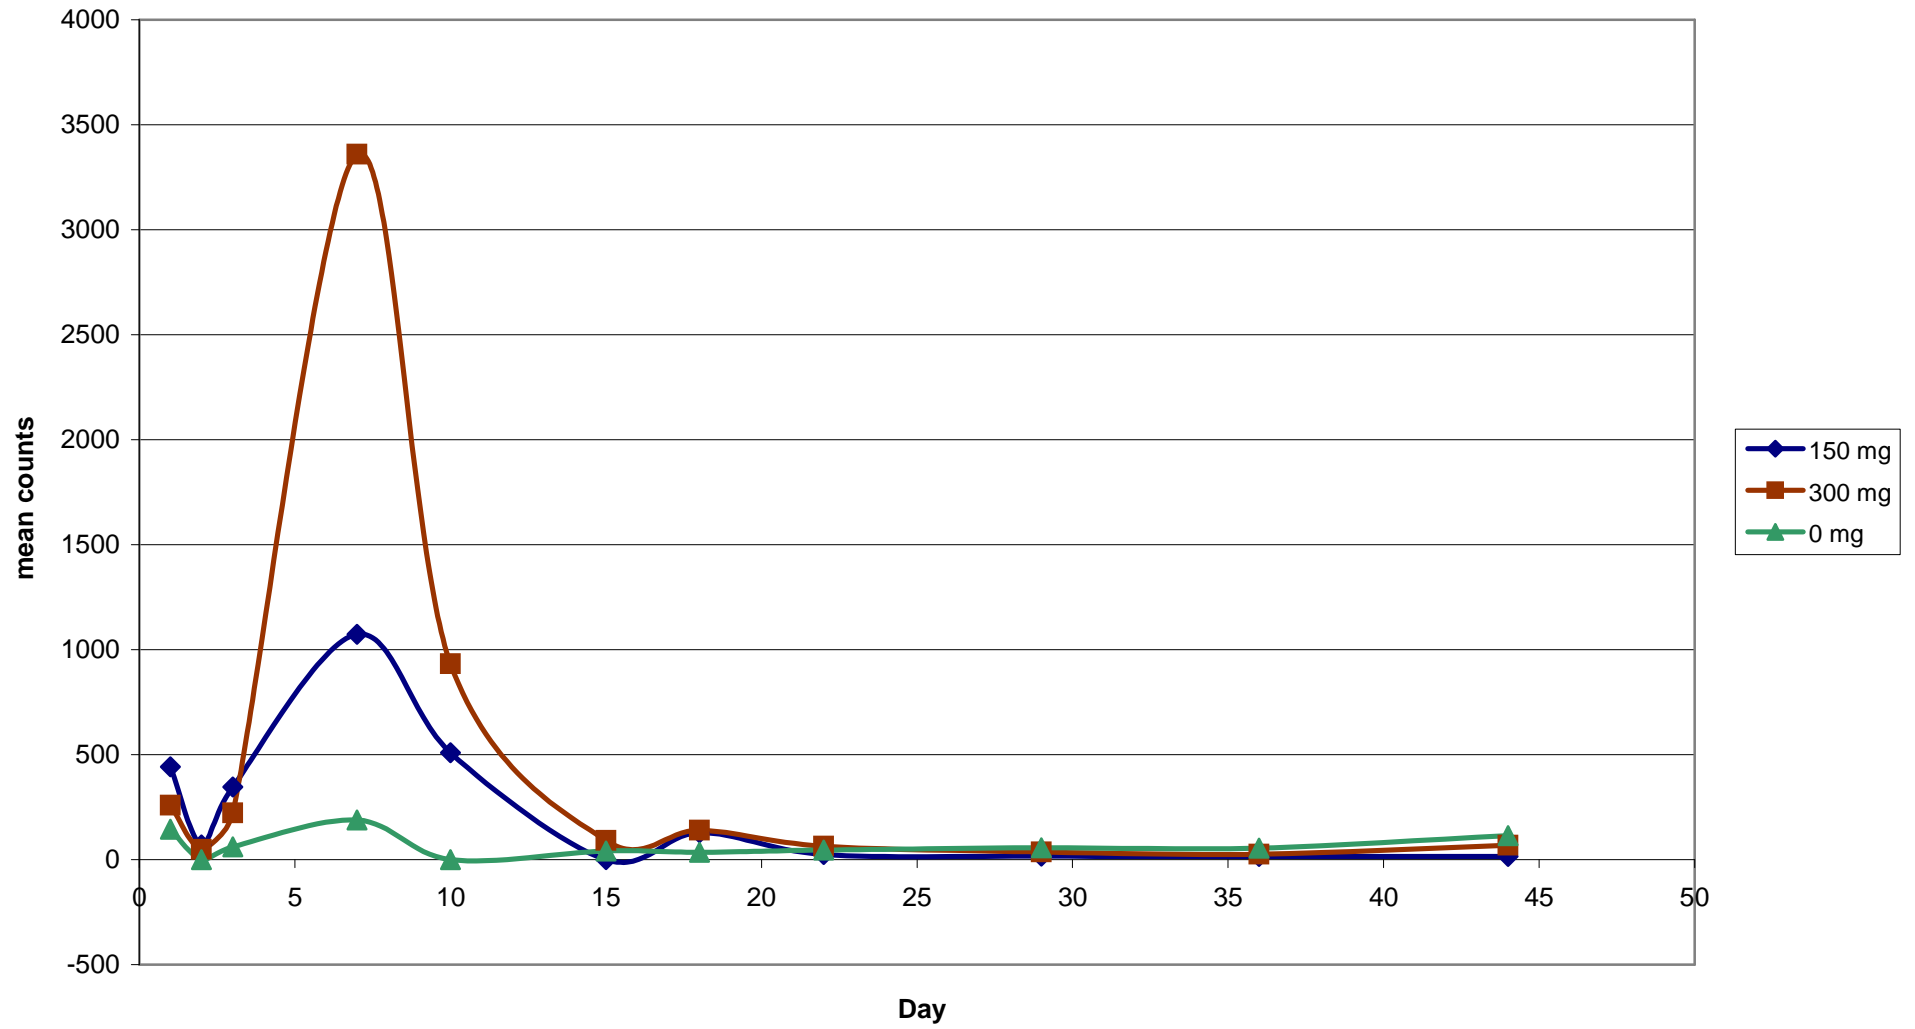

ID 14696

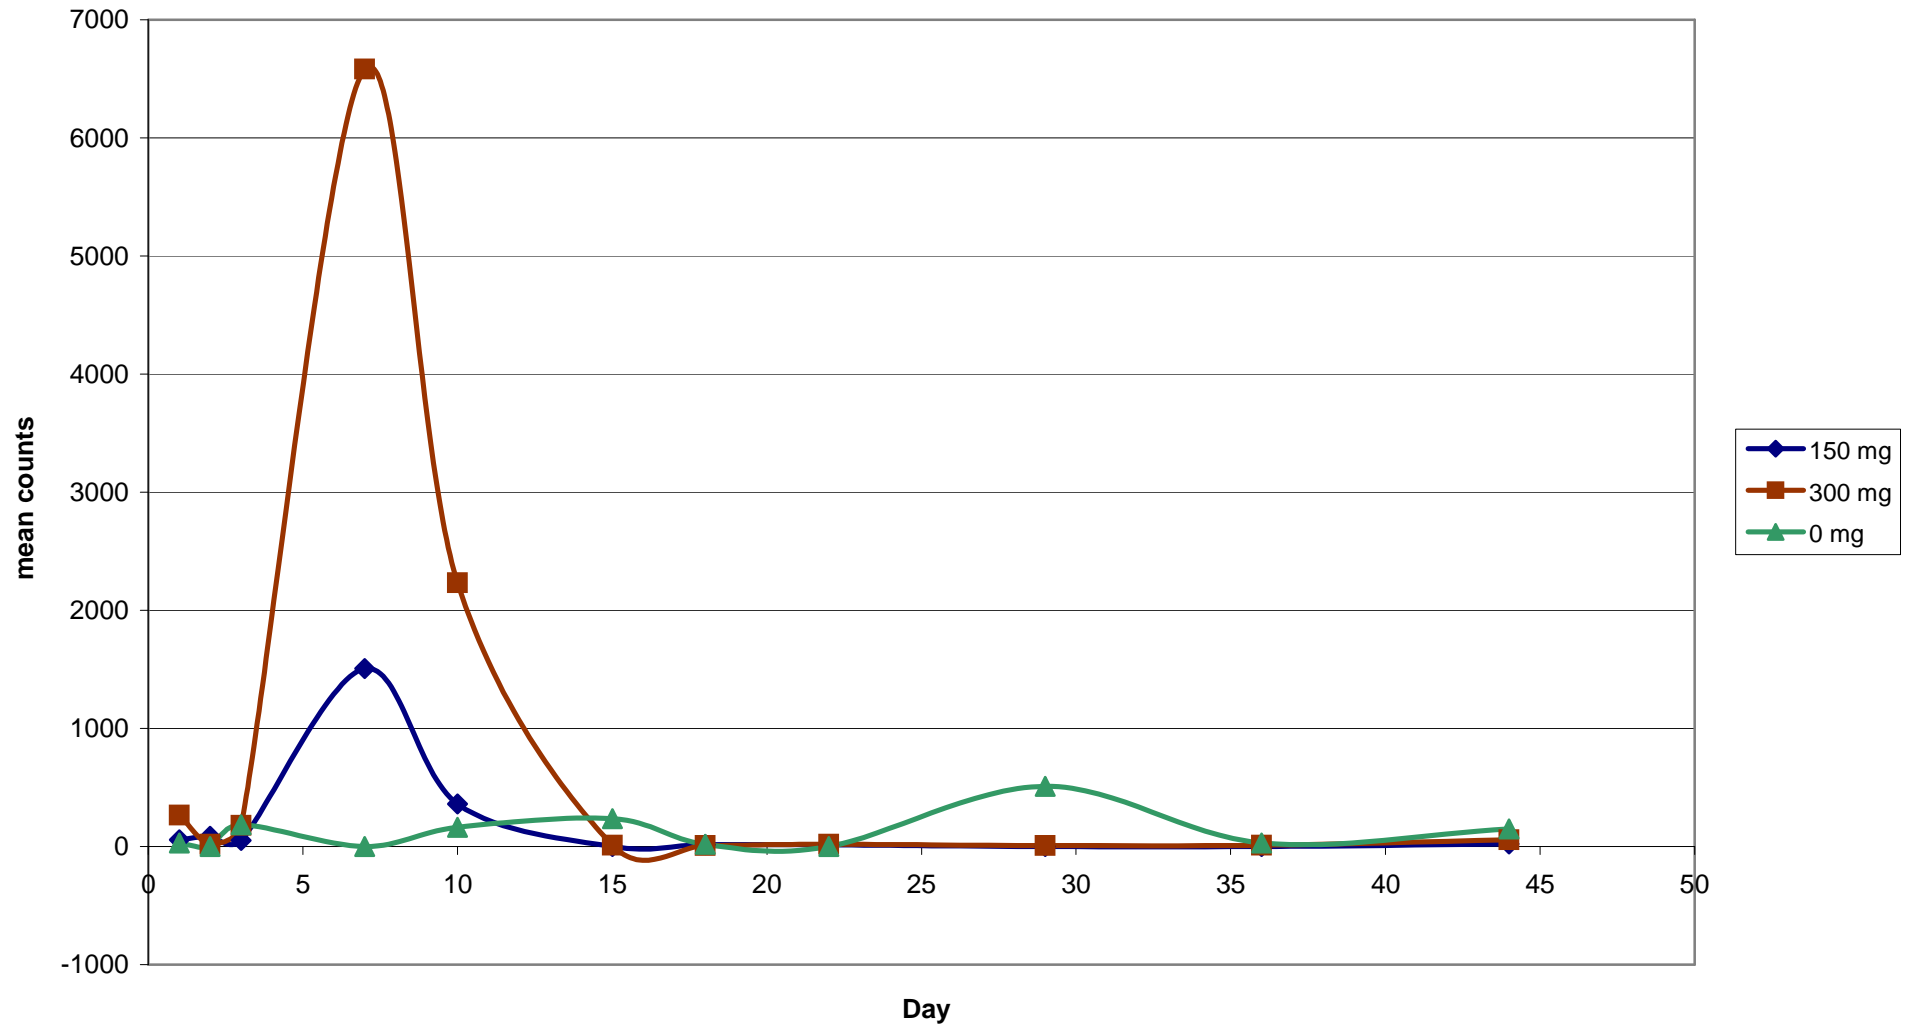



ID 14403

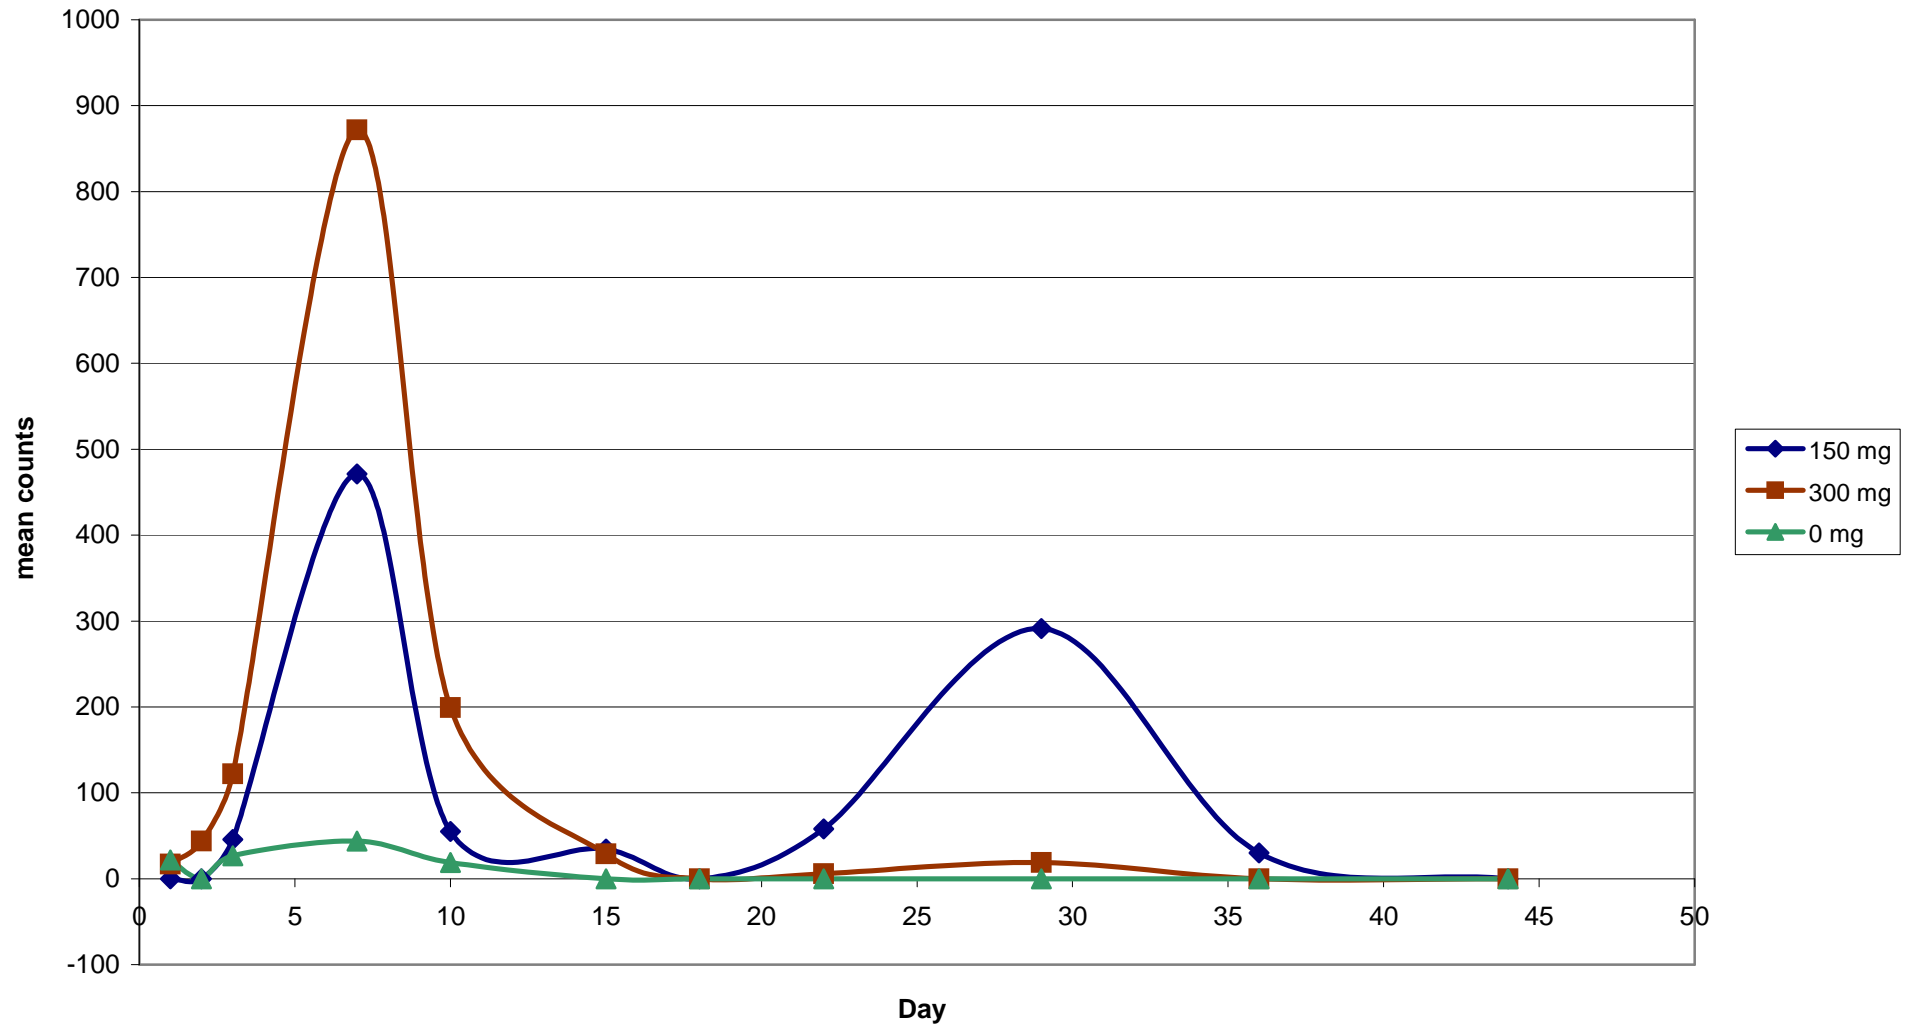

ID 14344

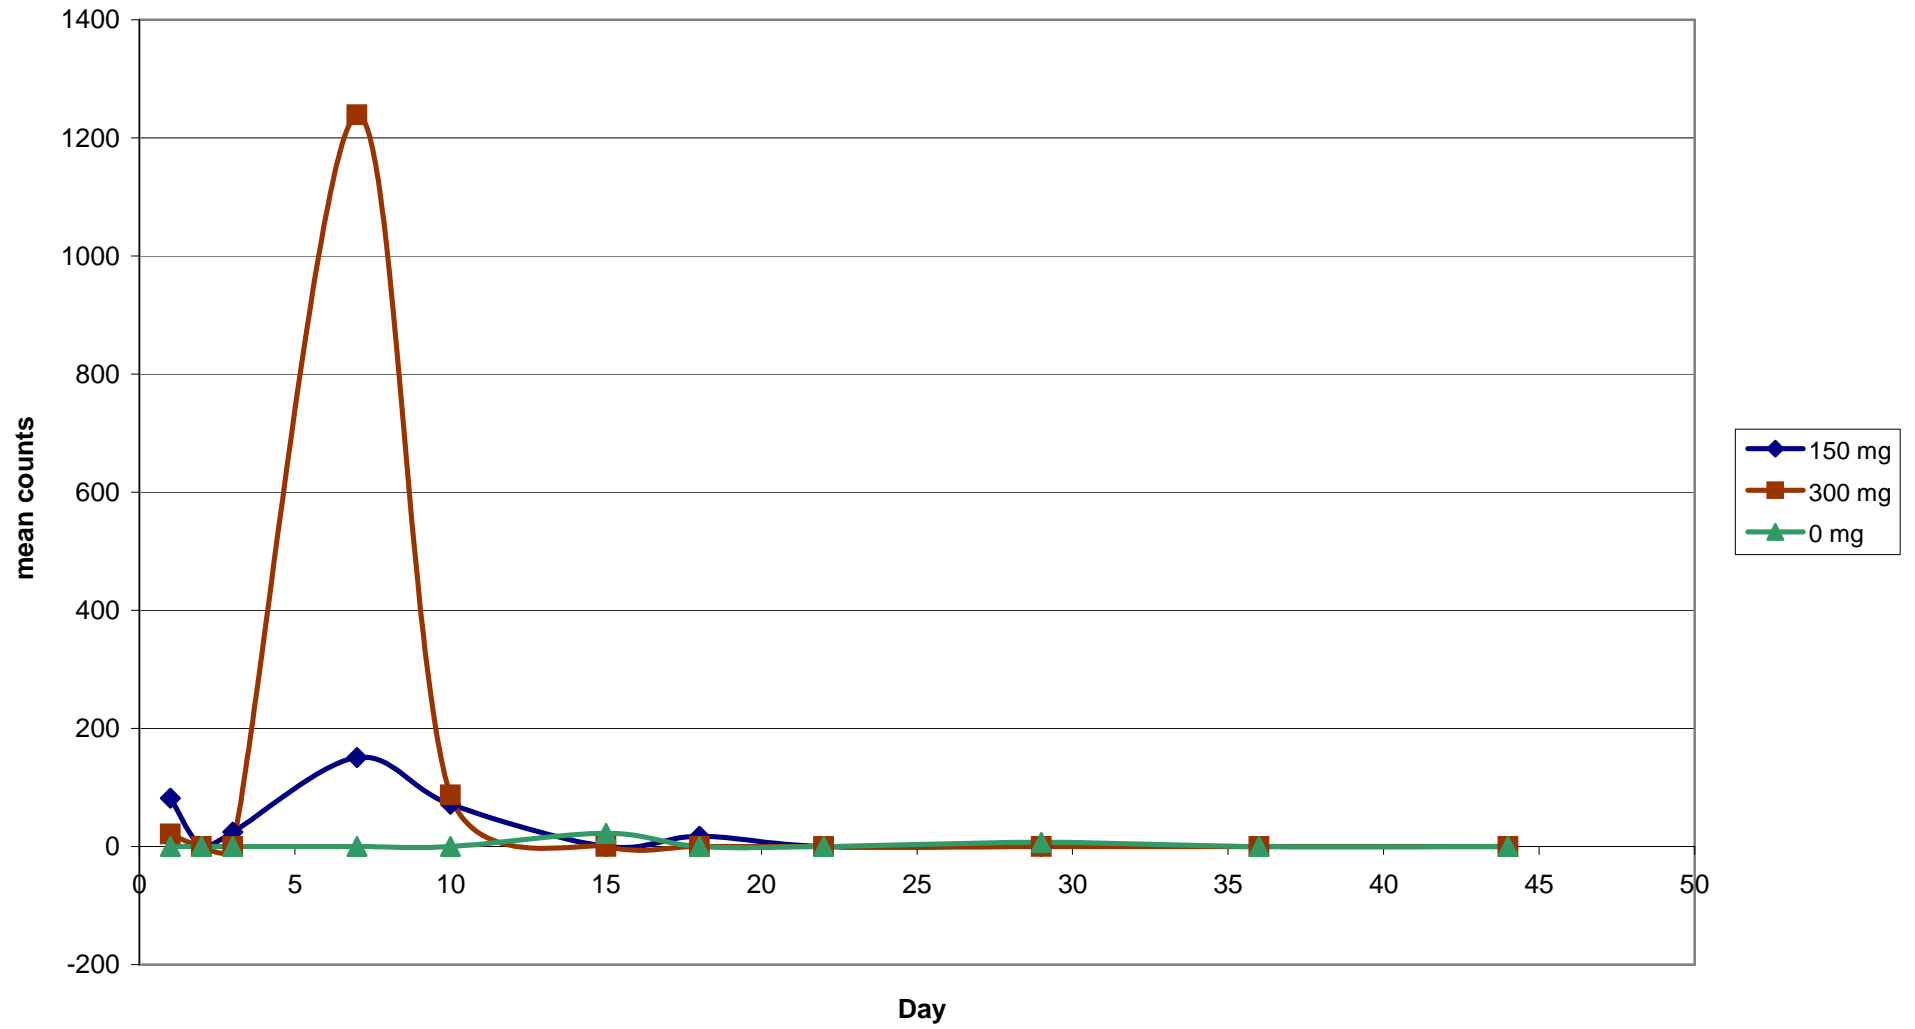

ID 14340

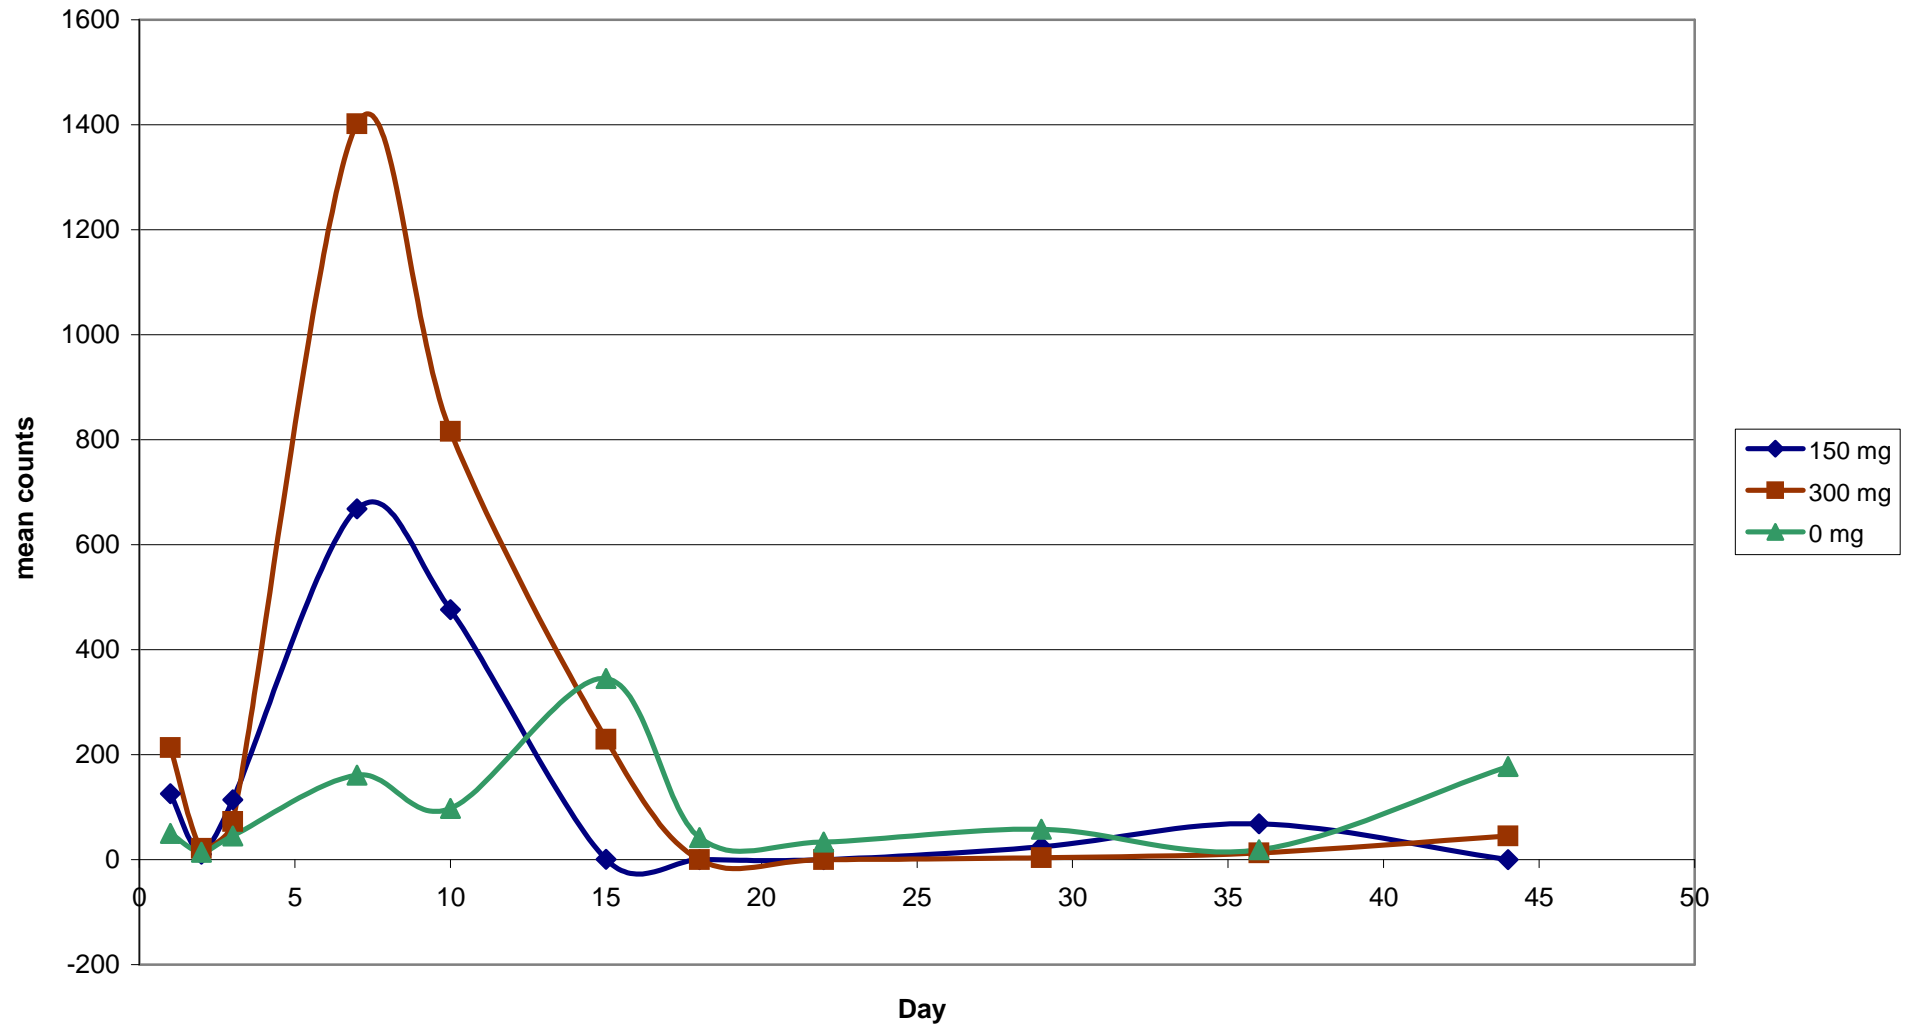

ID 14105

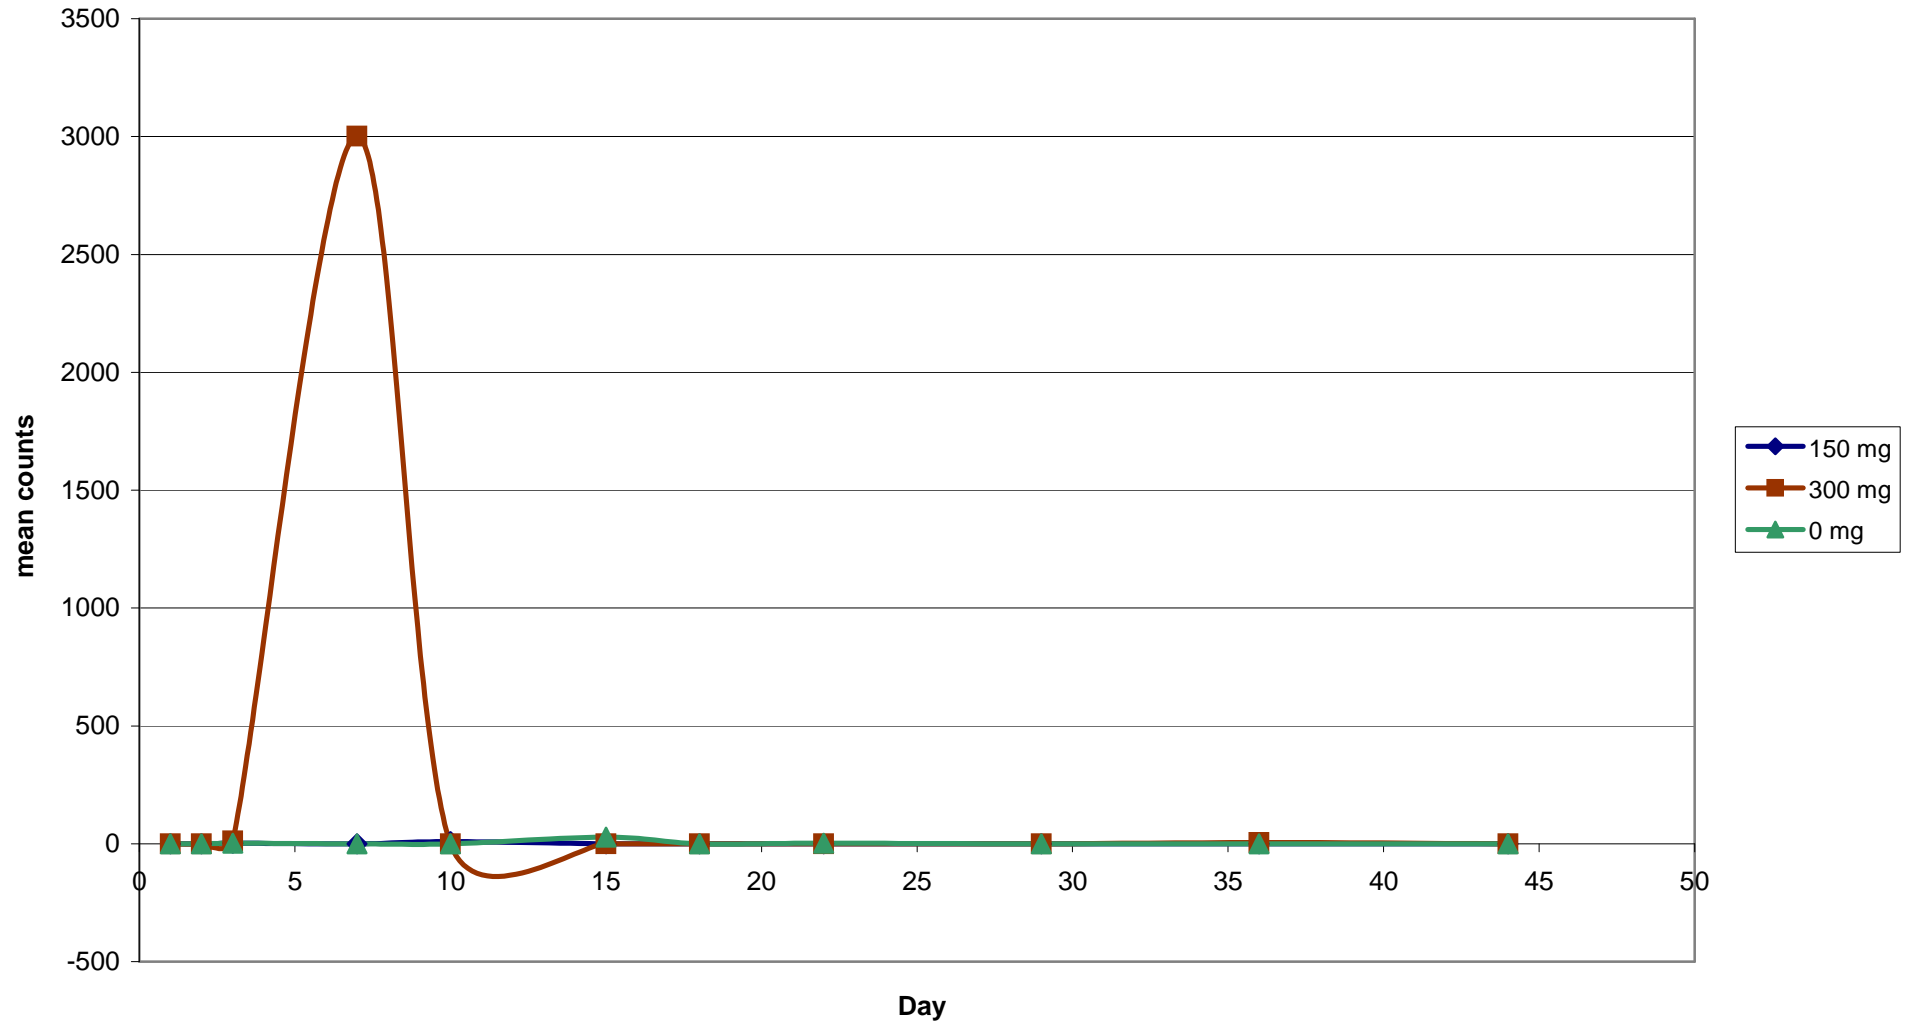

ID 13899

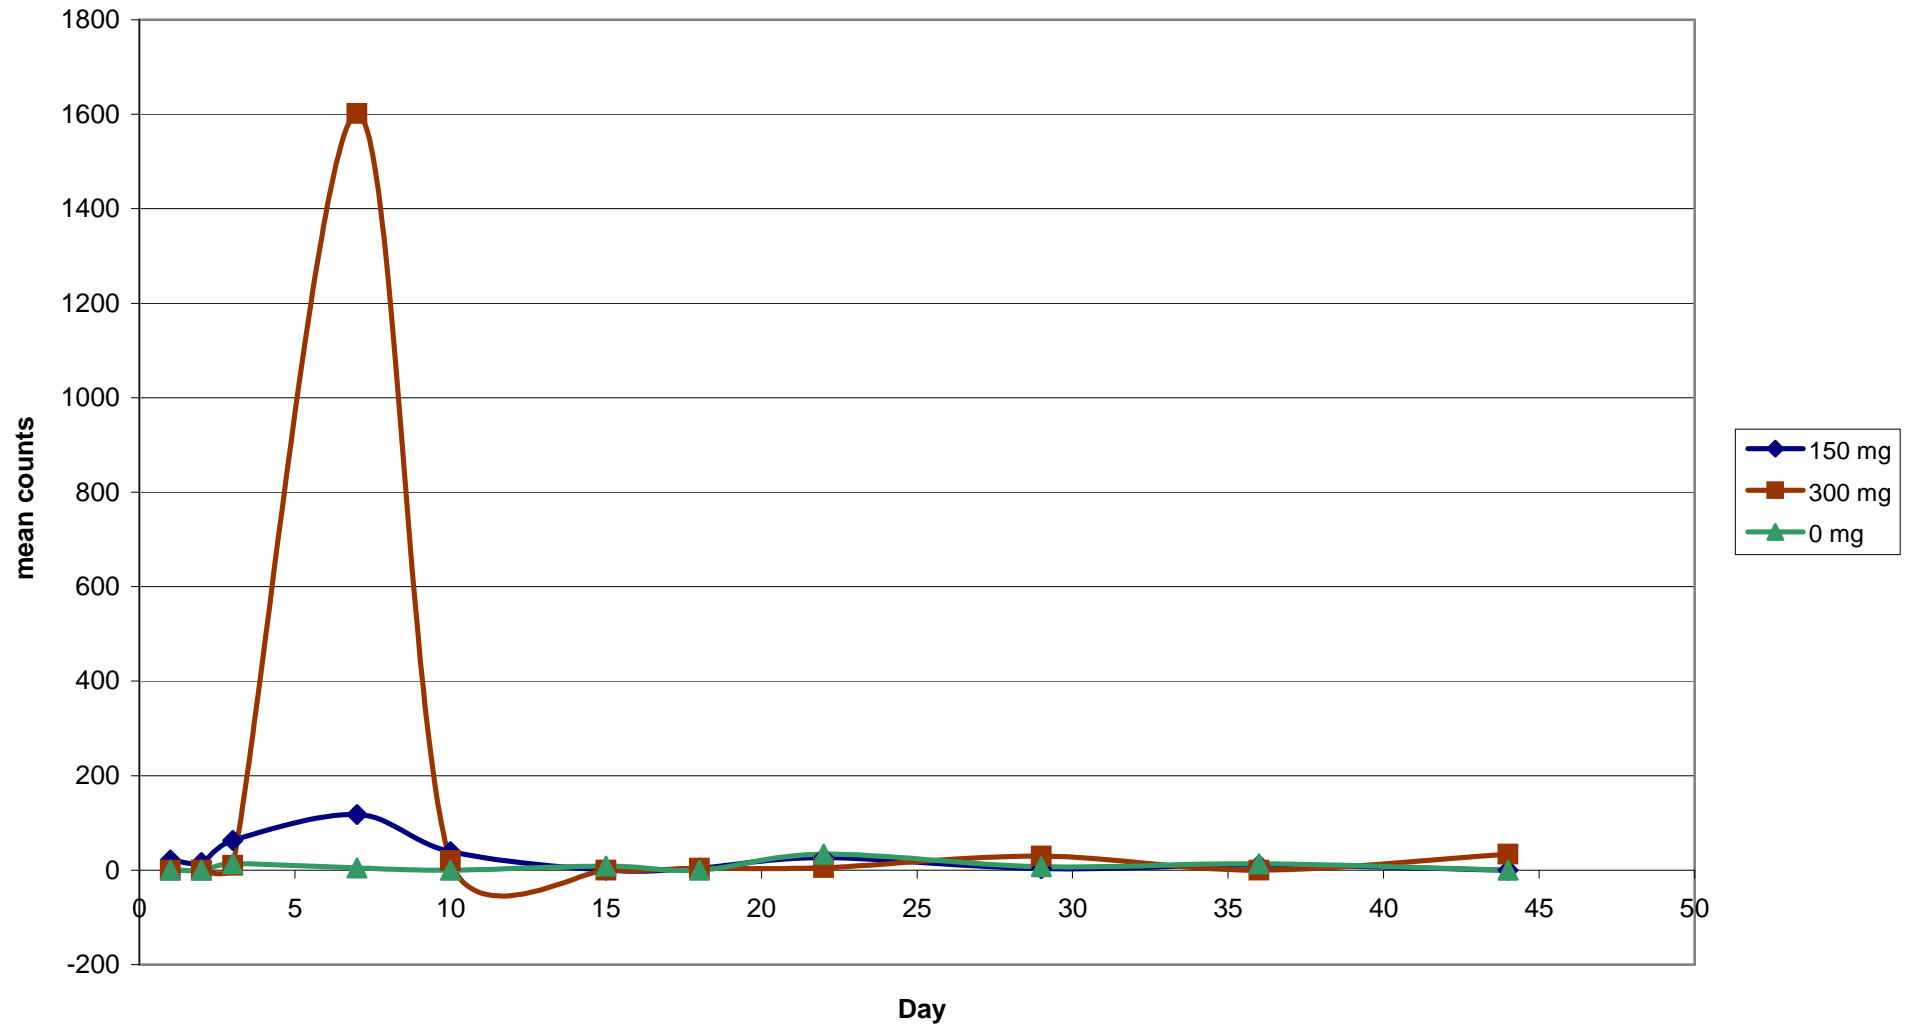

ID 13862

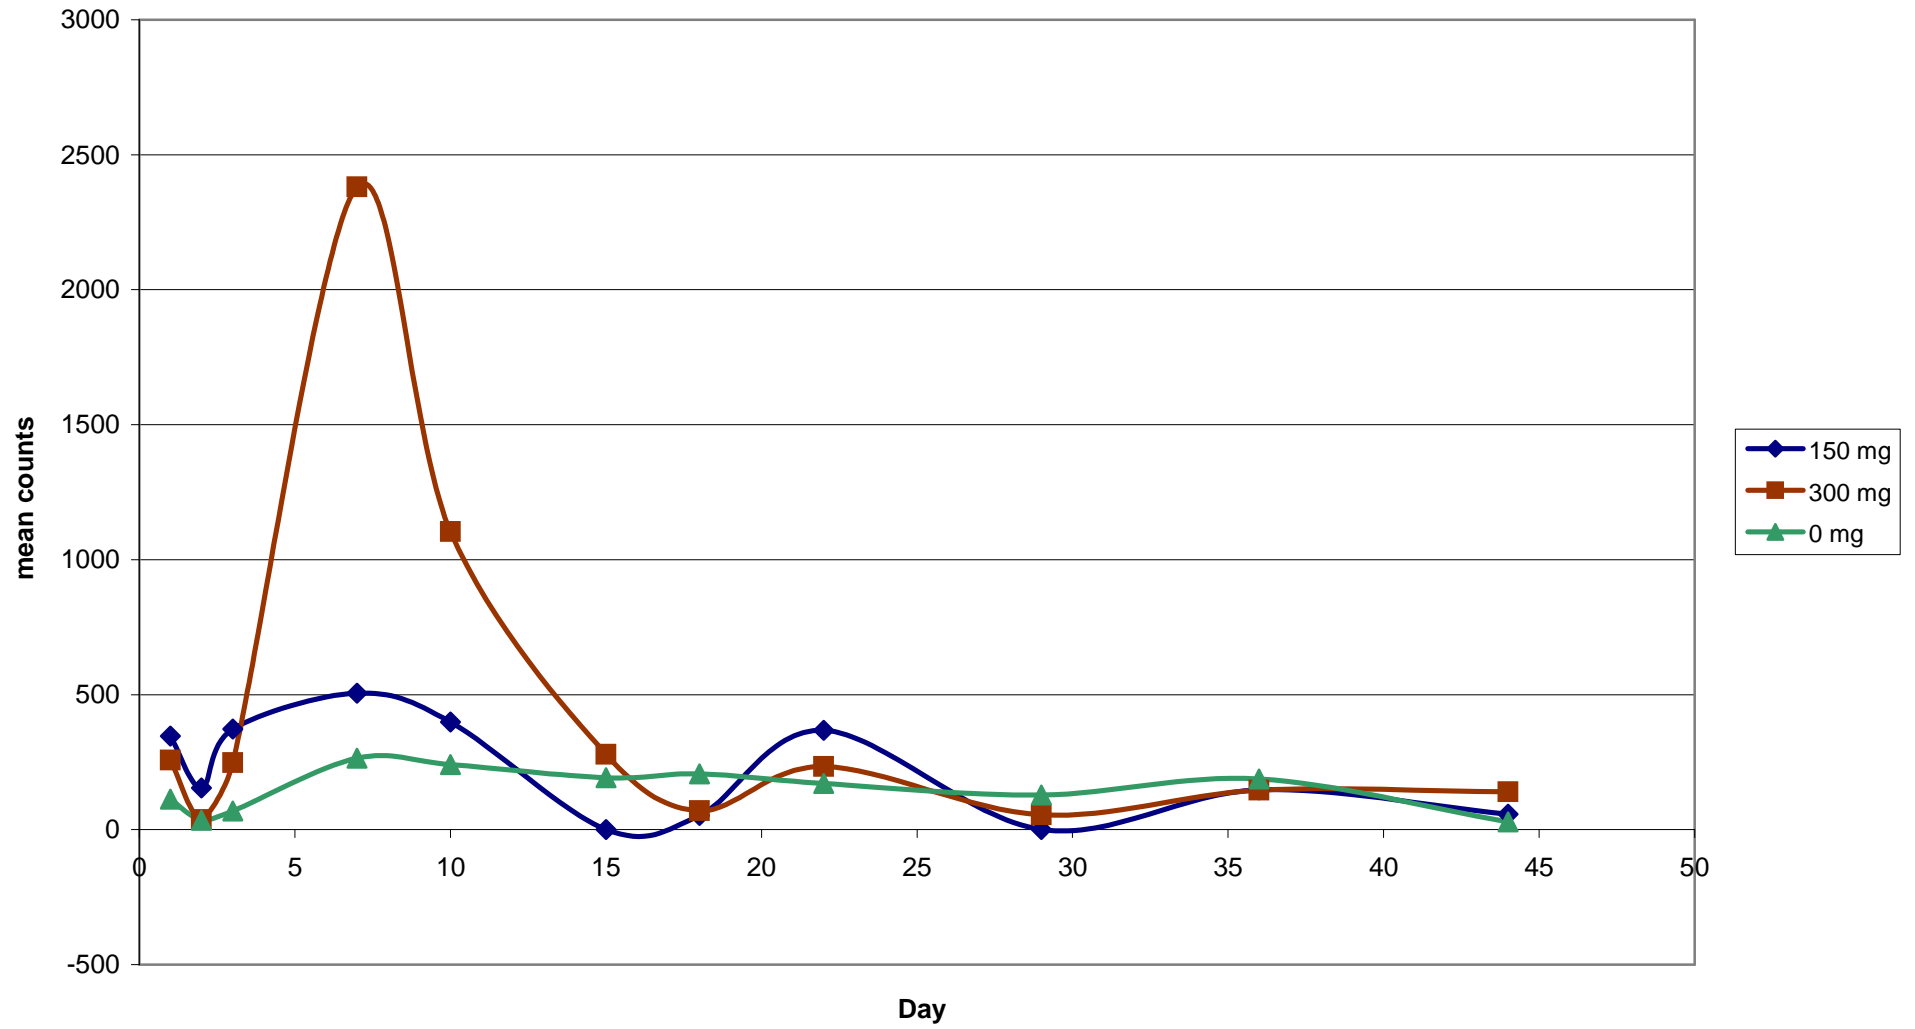

ID 13847

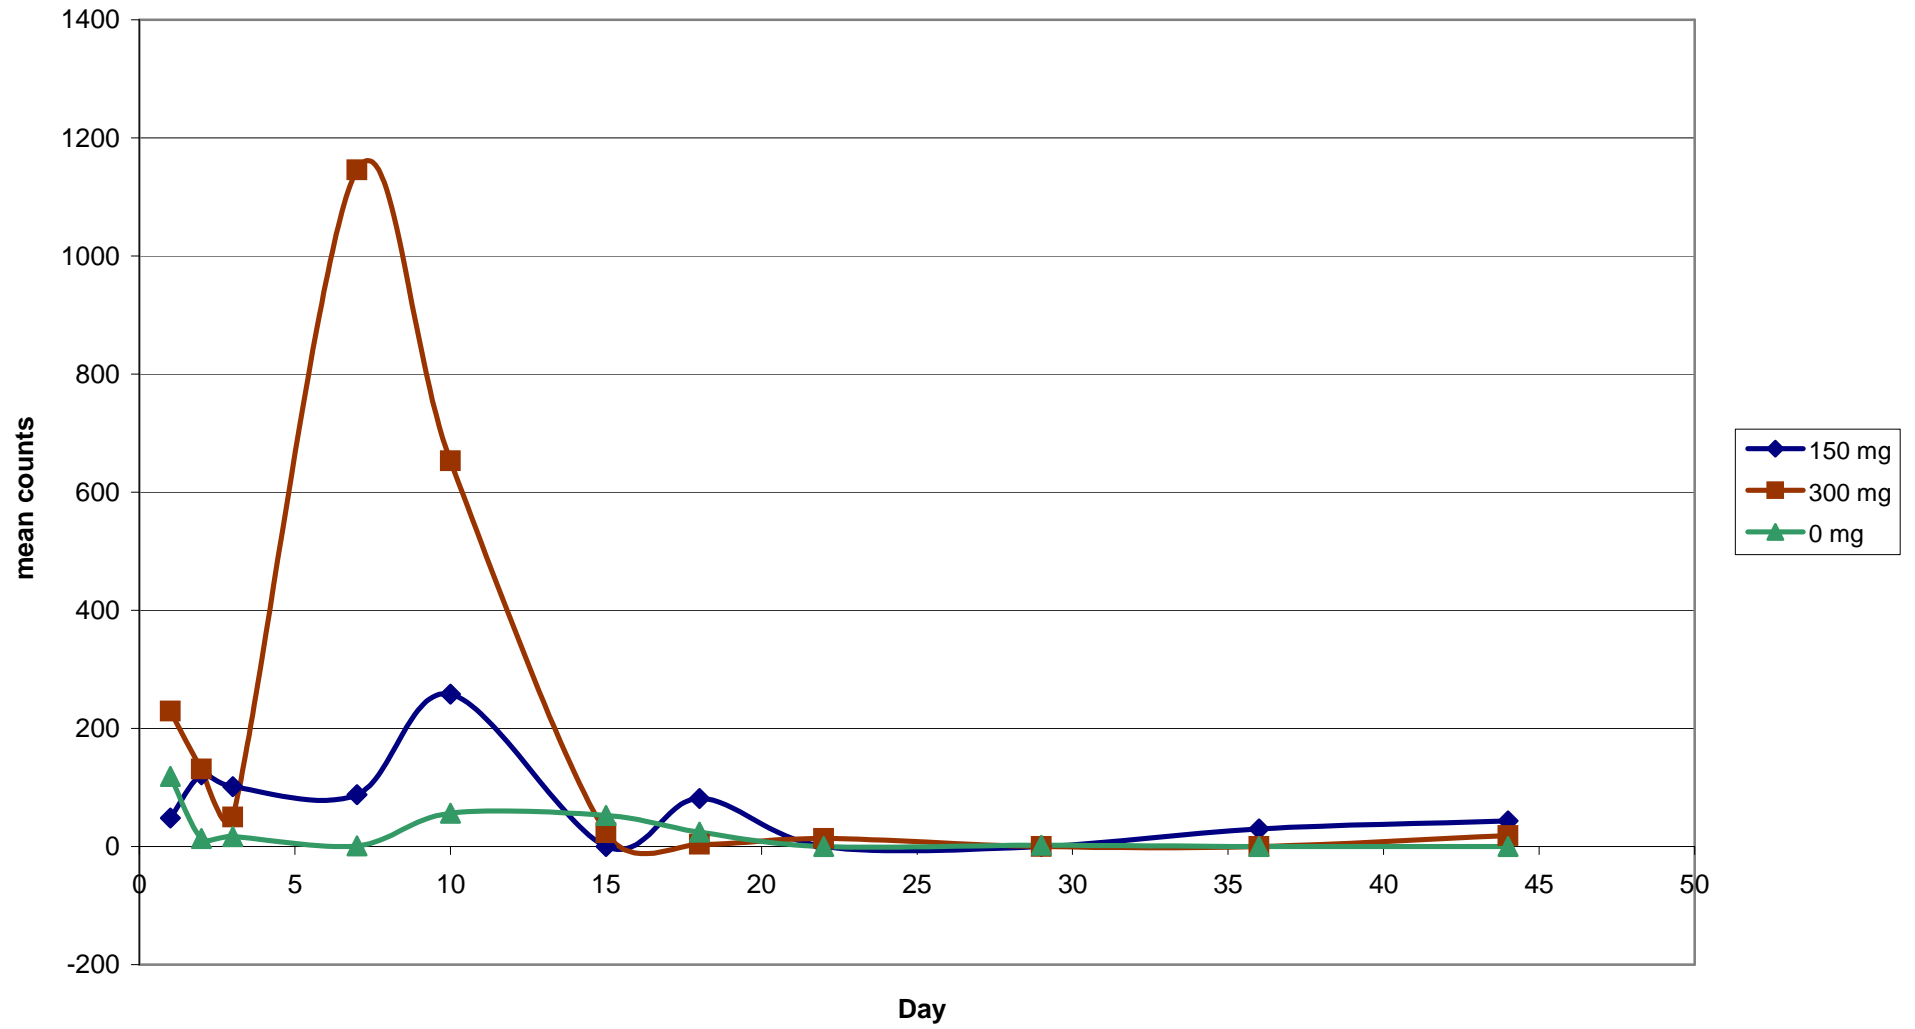

ID 13796

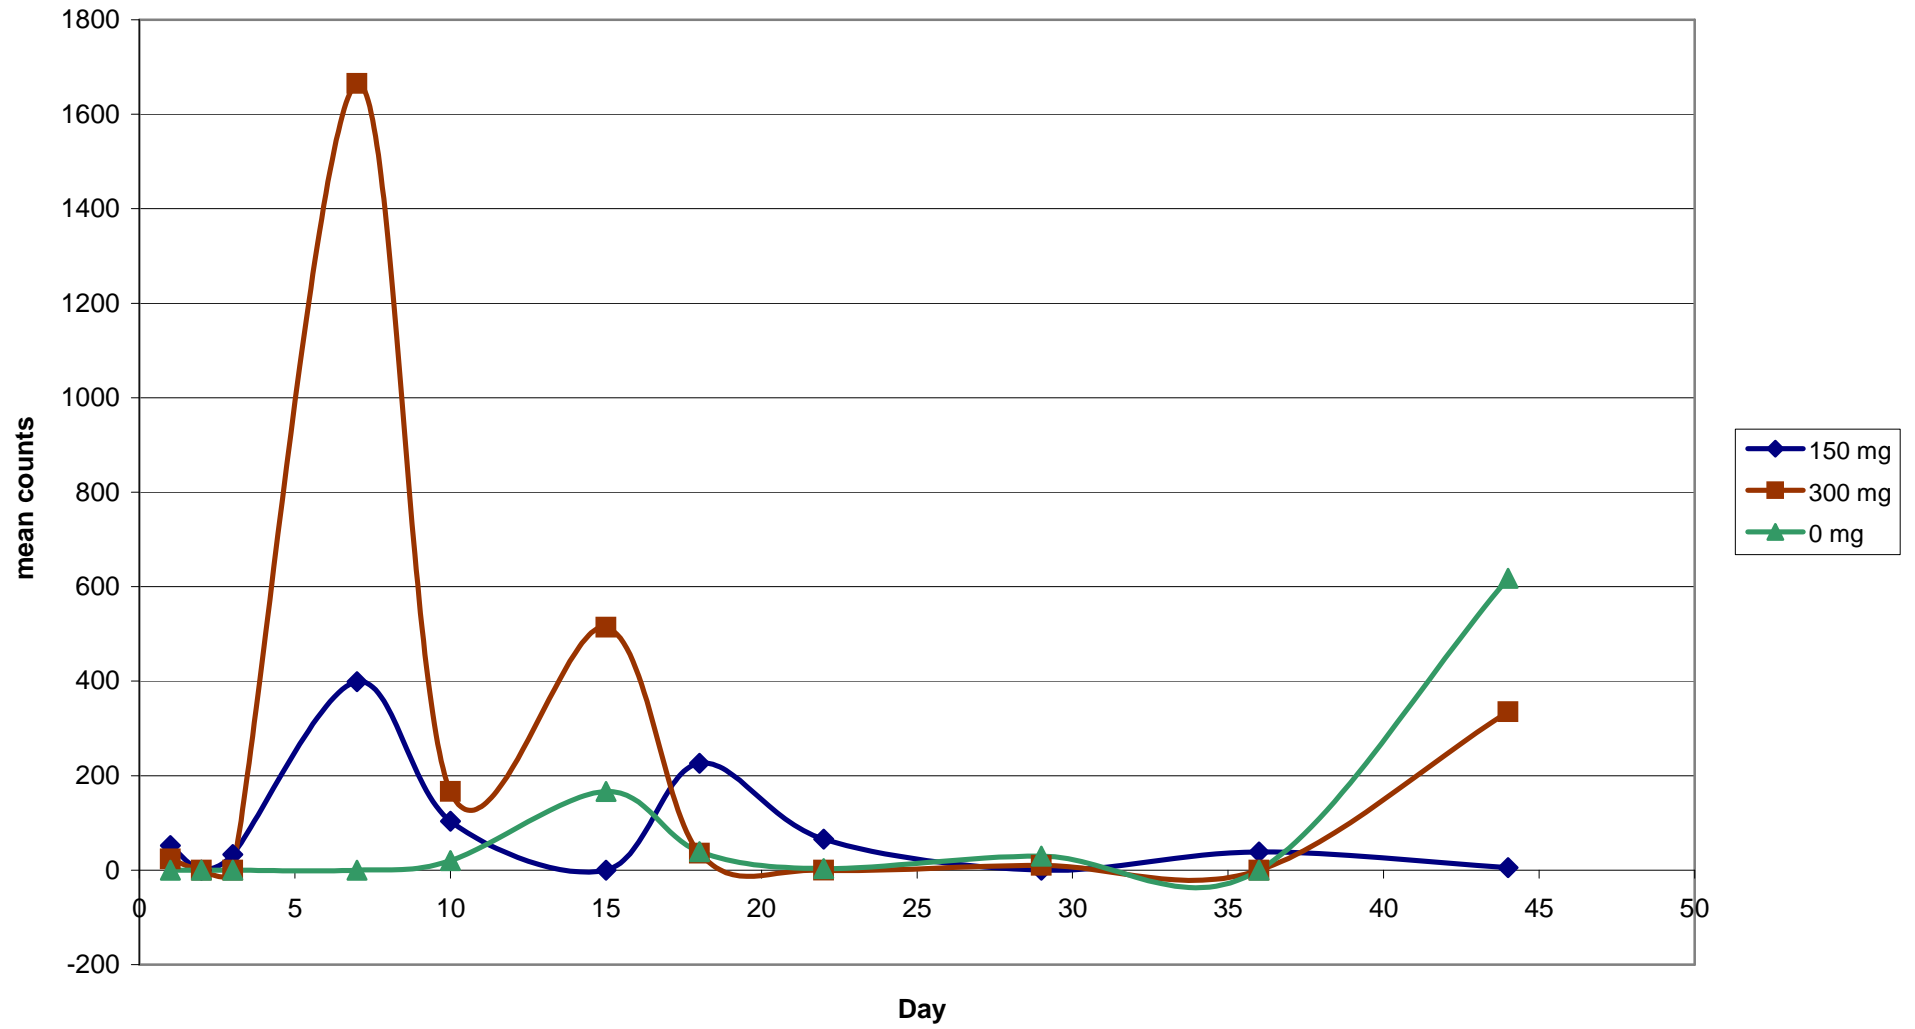



ID 13570

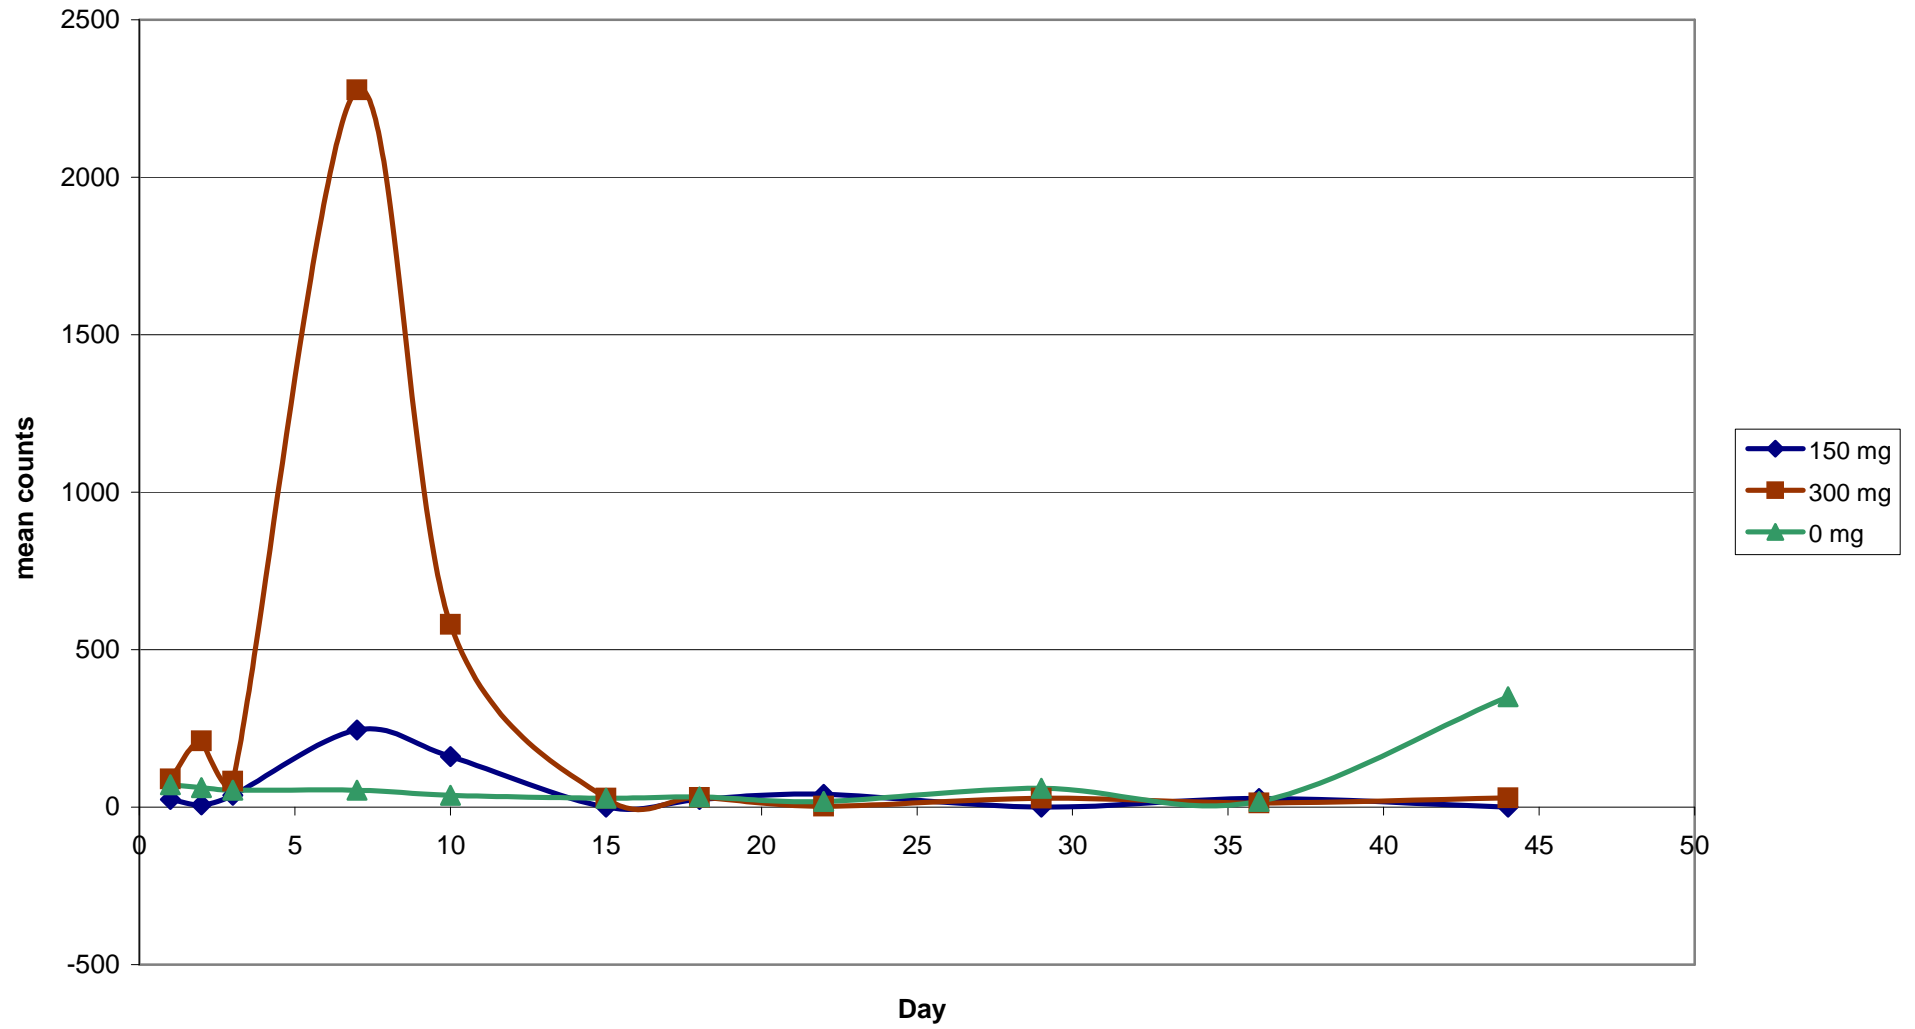

ID 13498

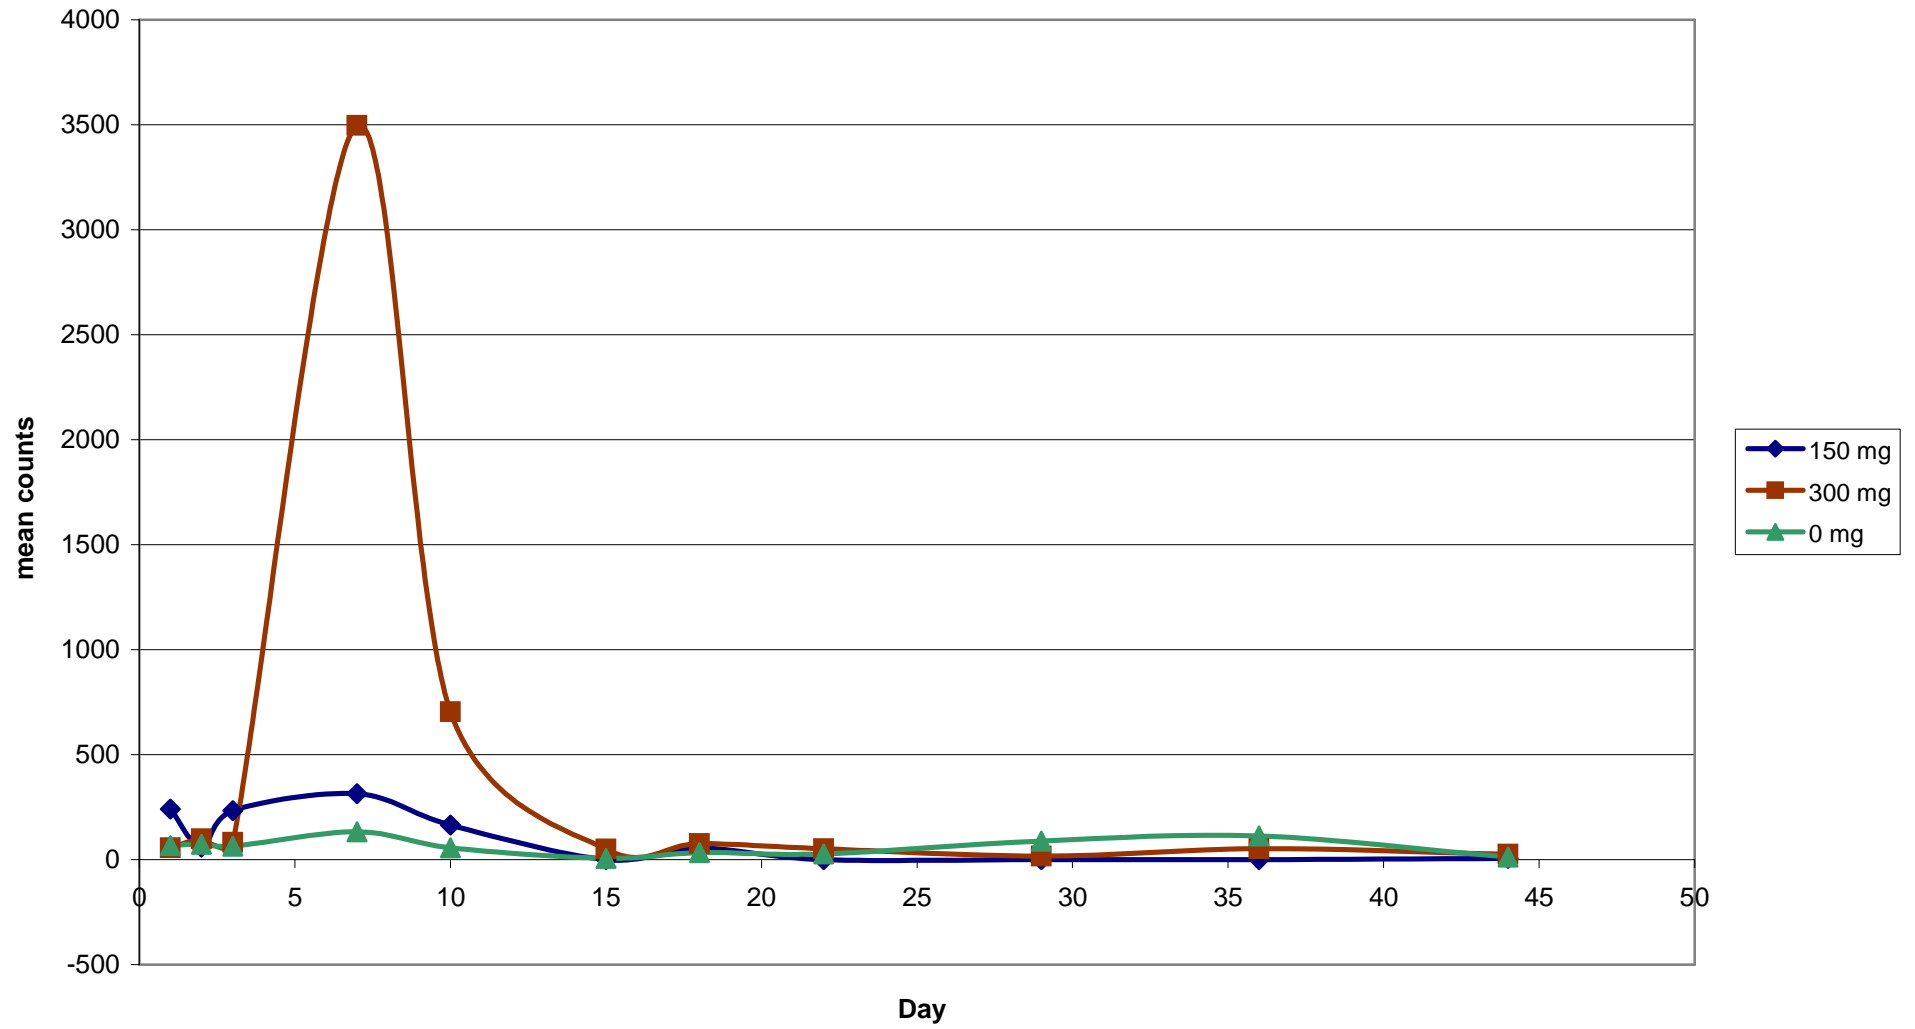

ID 13456

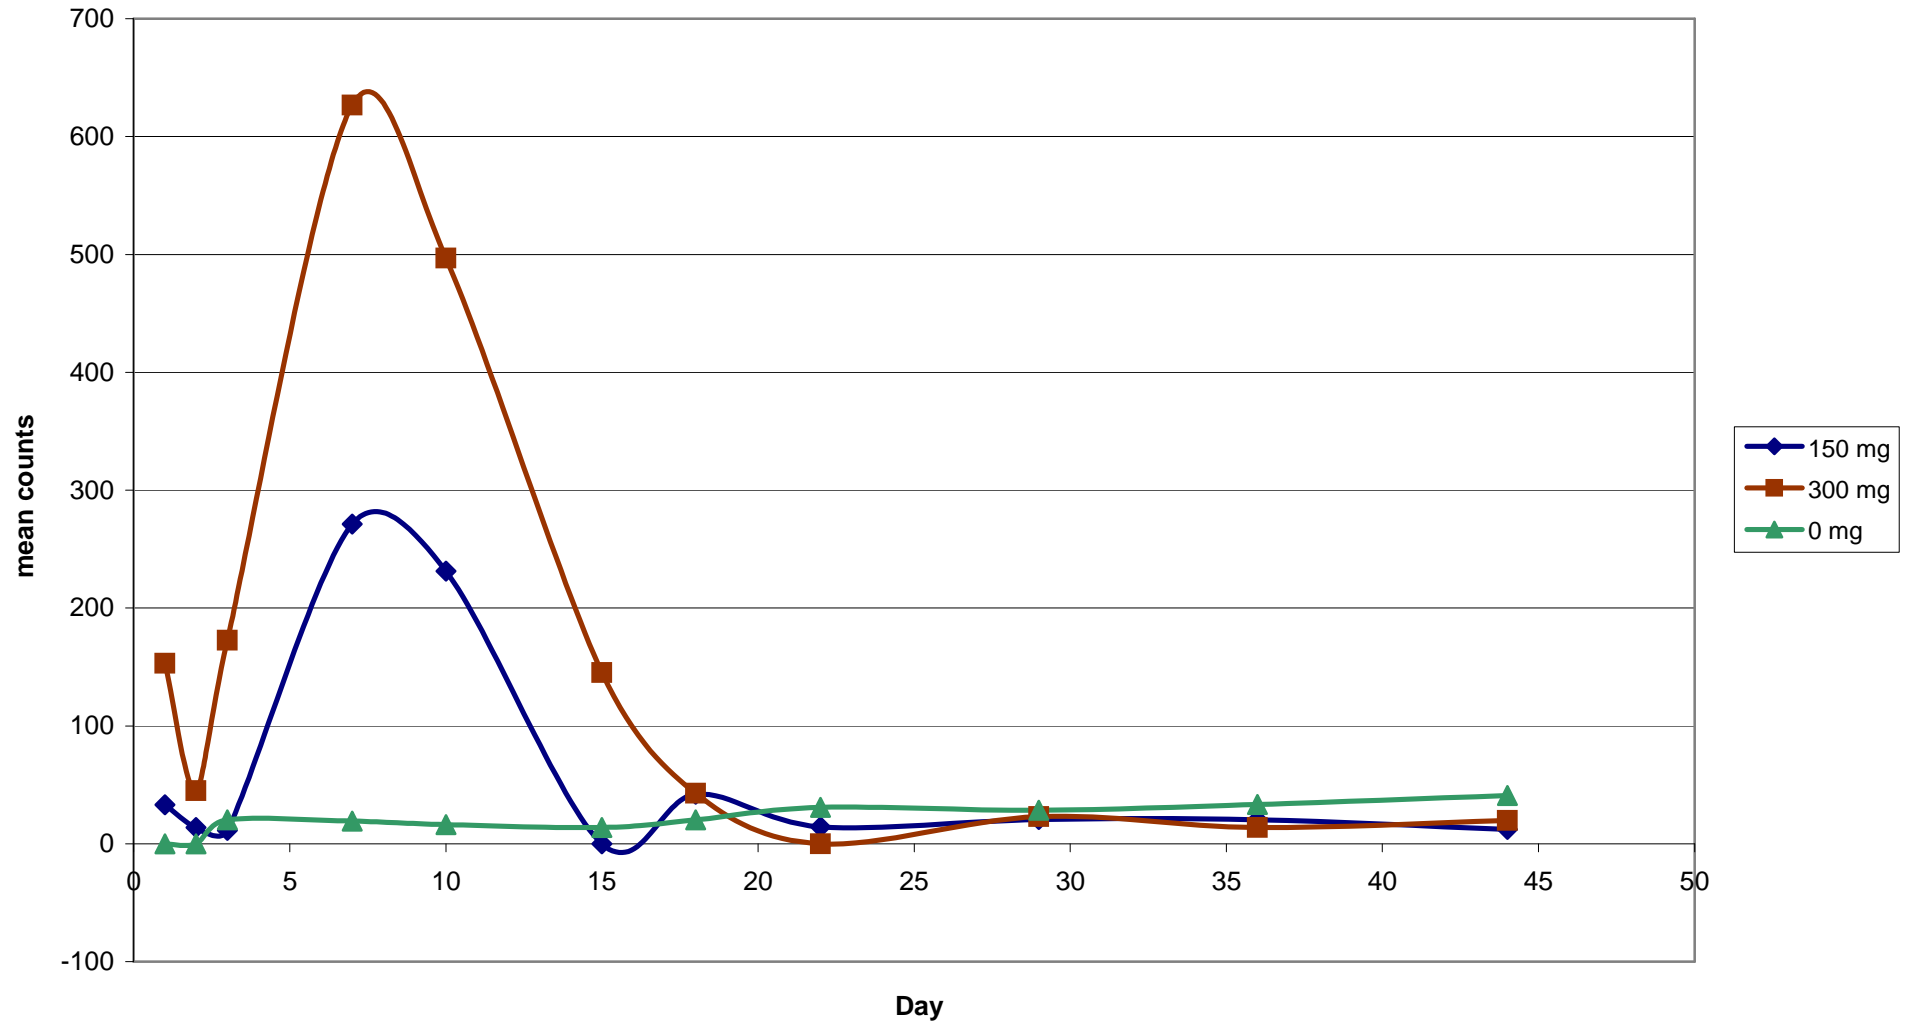

ID 13419

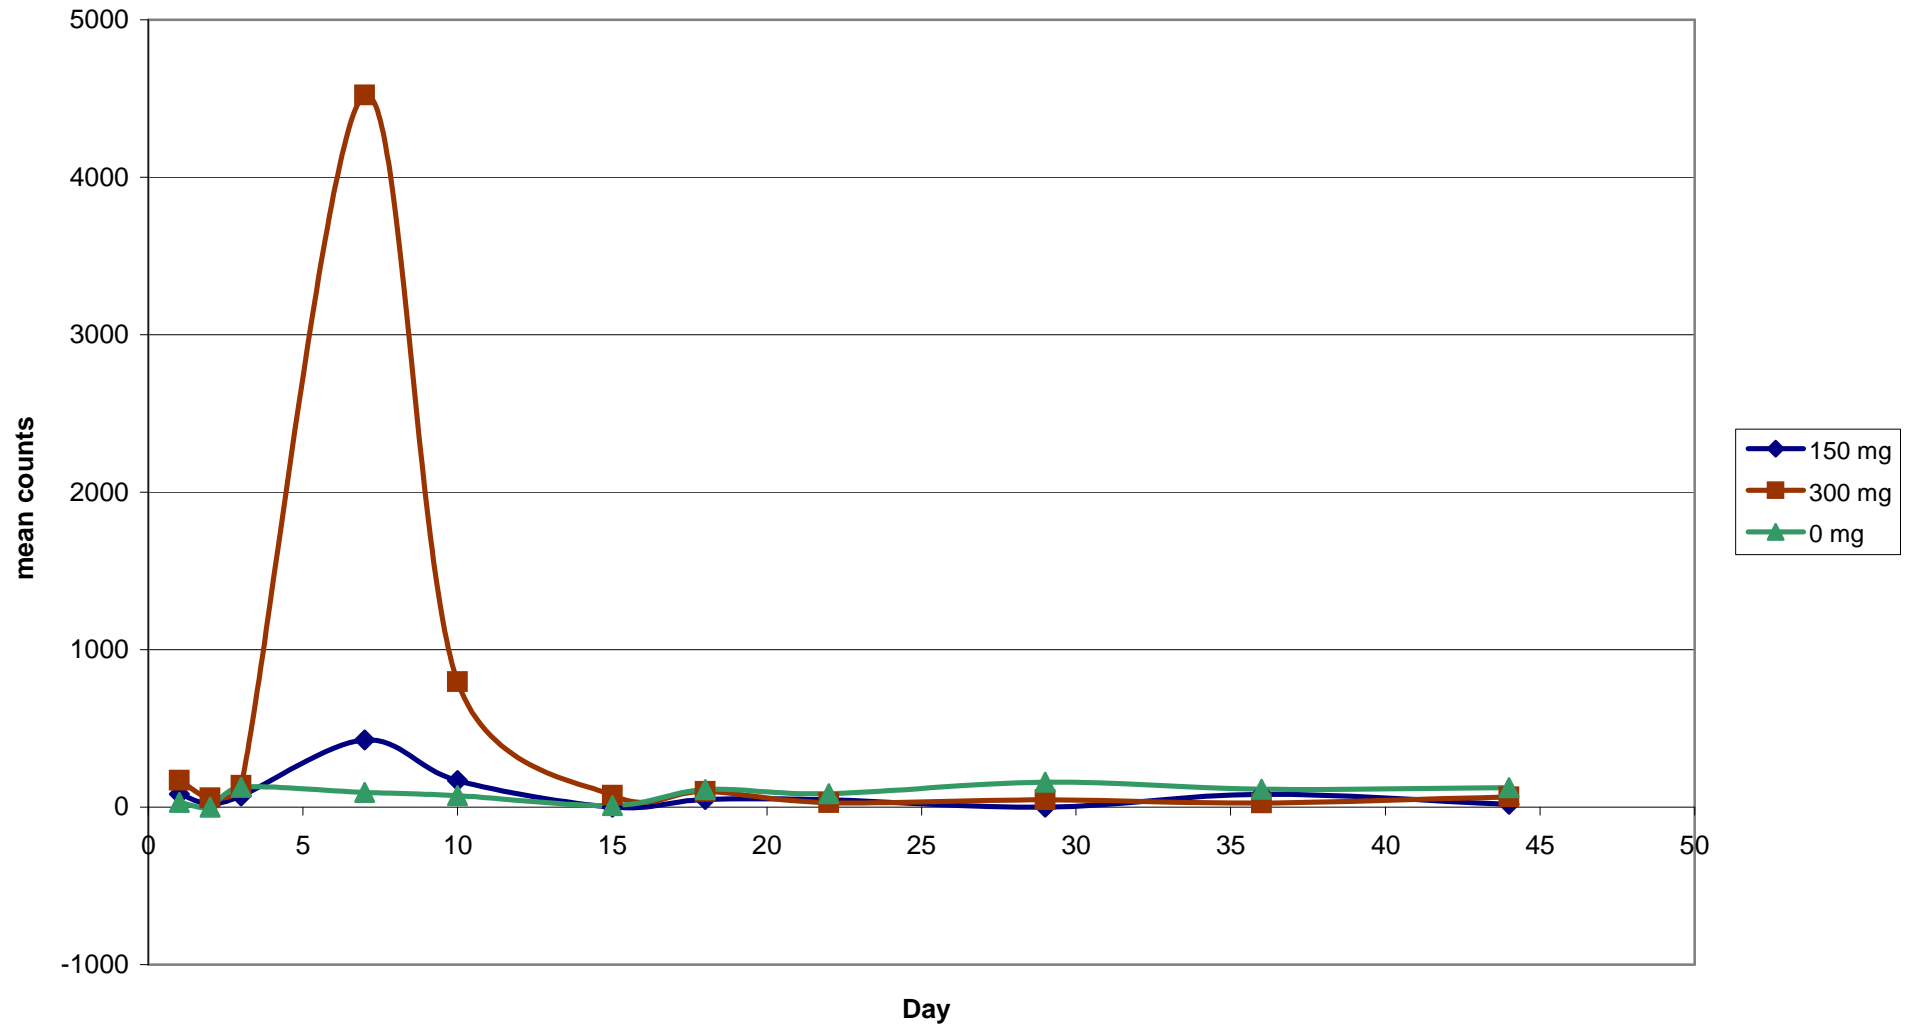

ID 13319

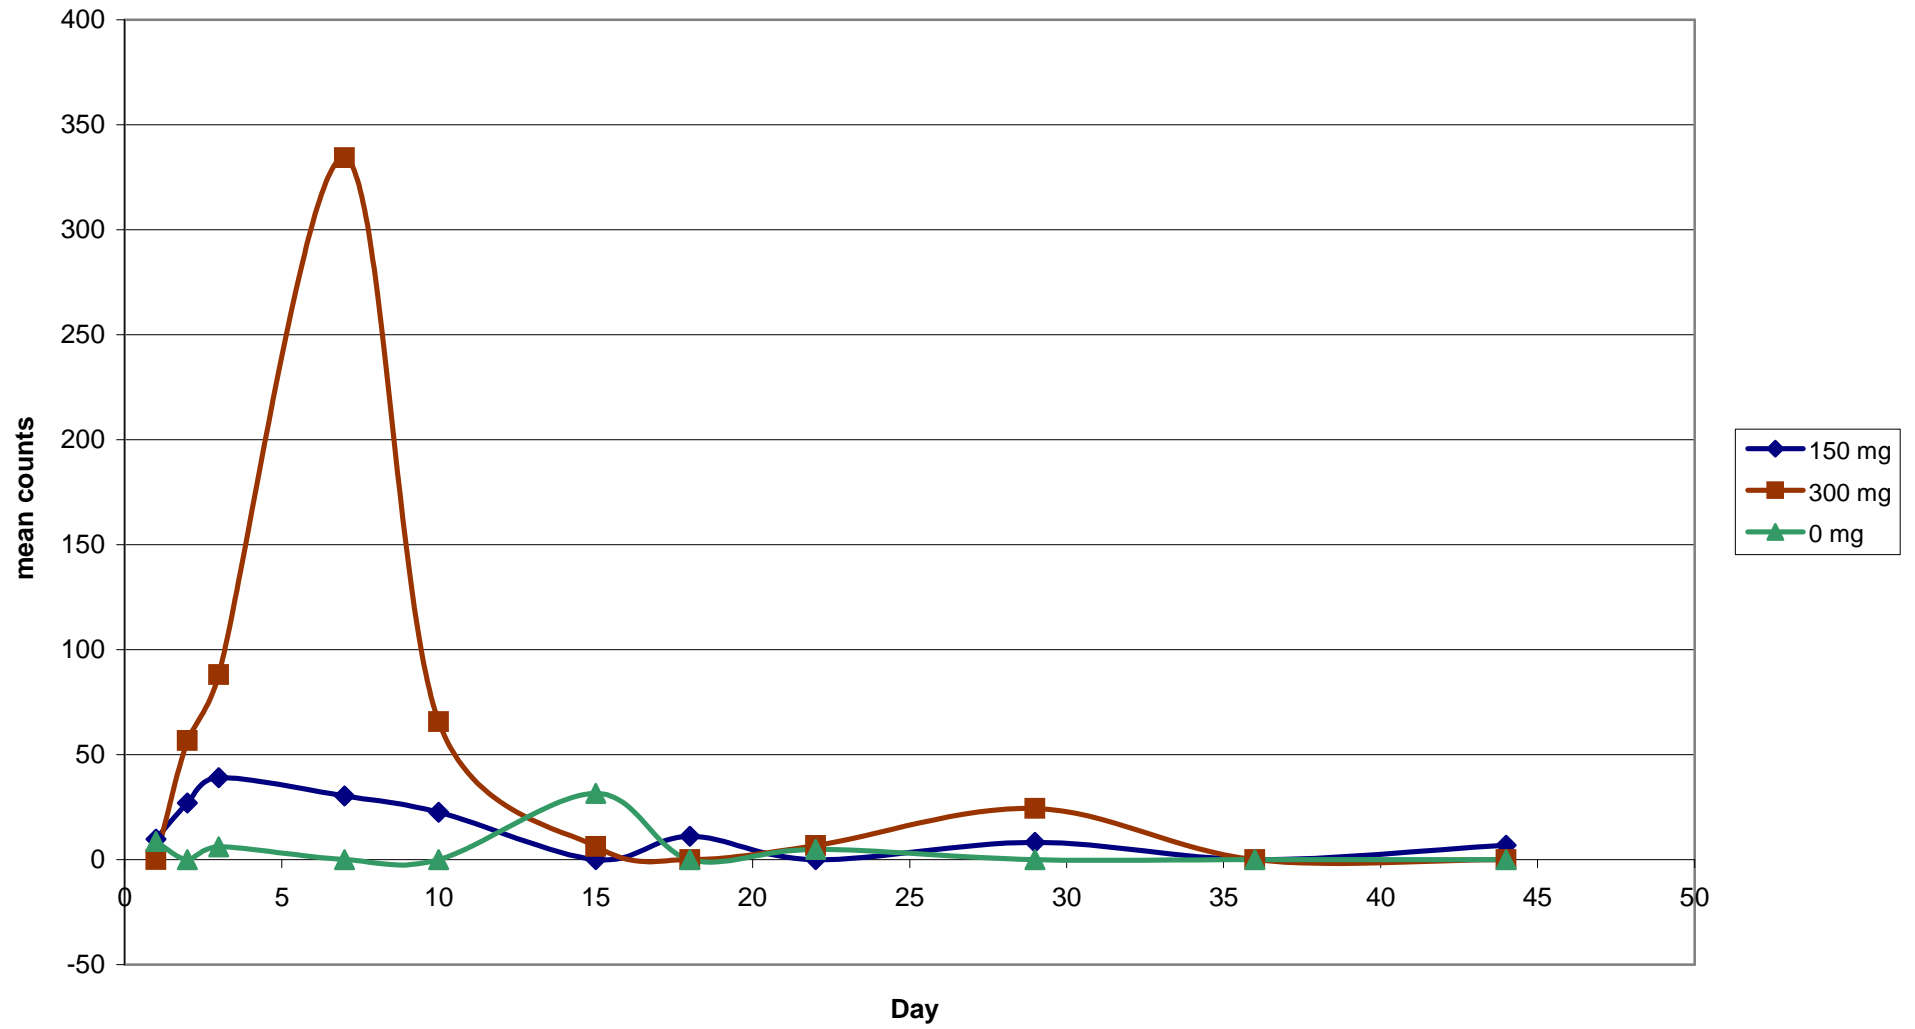

ID 13083

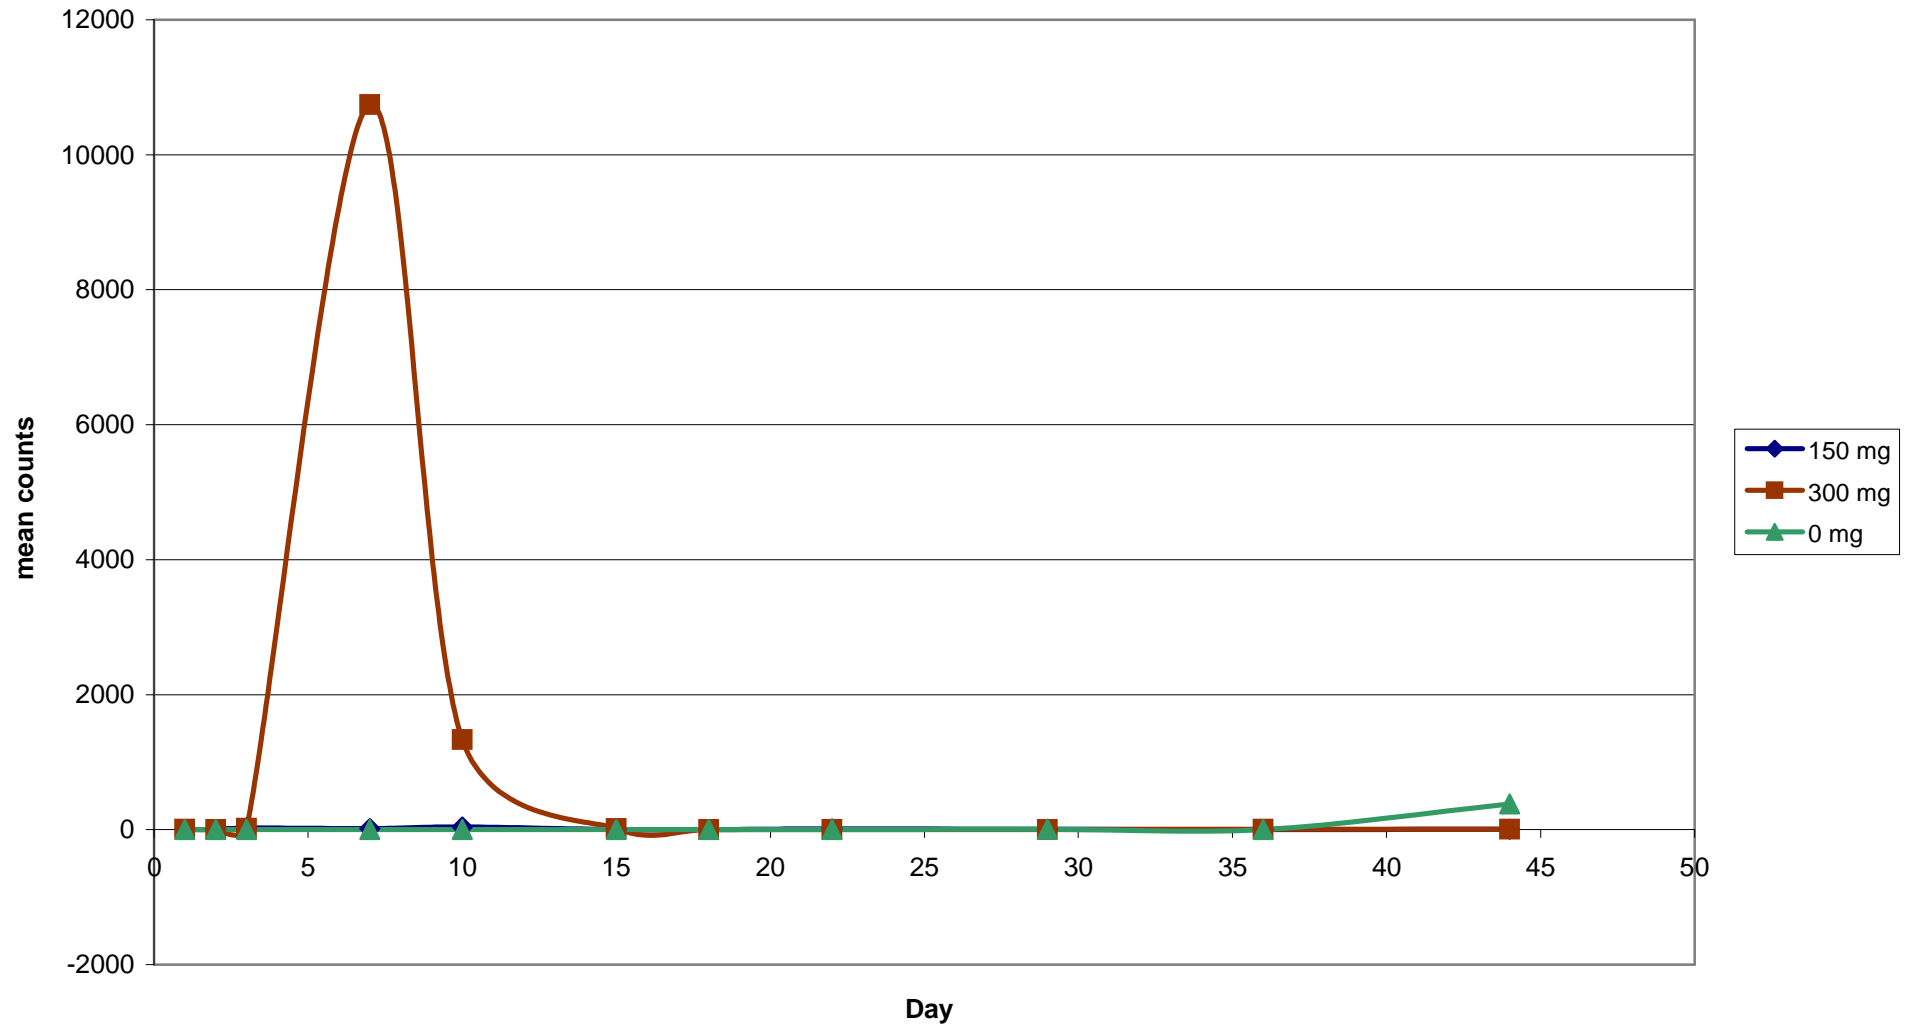

ID 12826

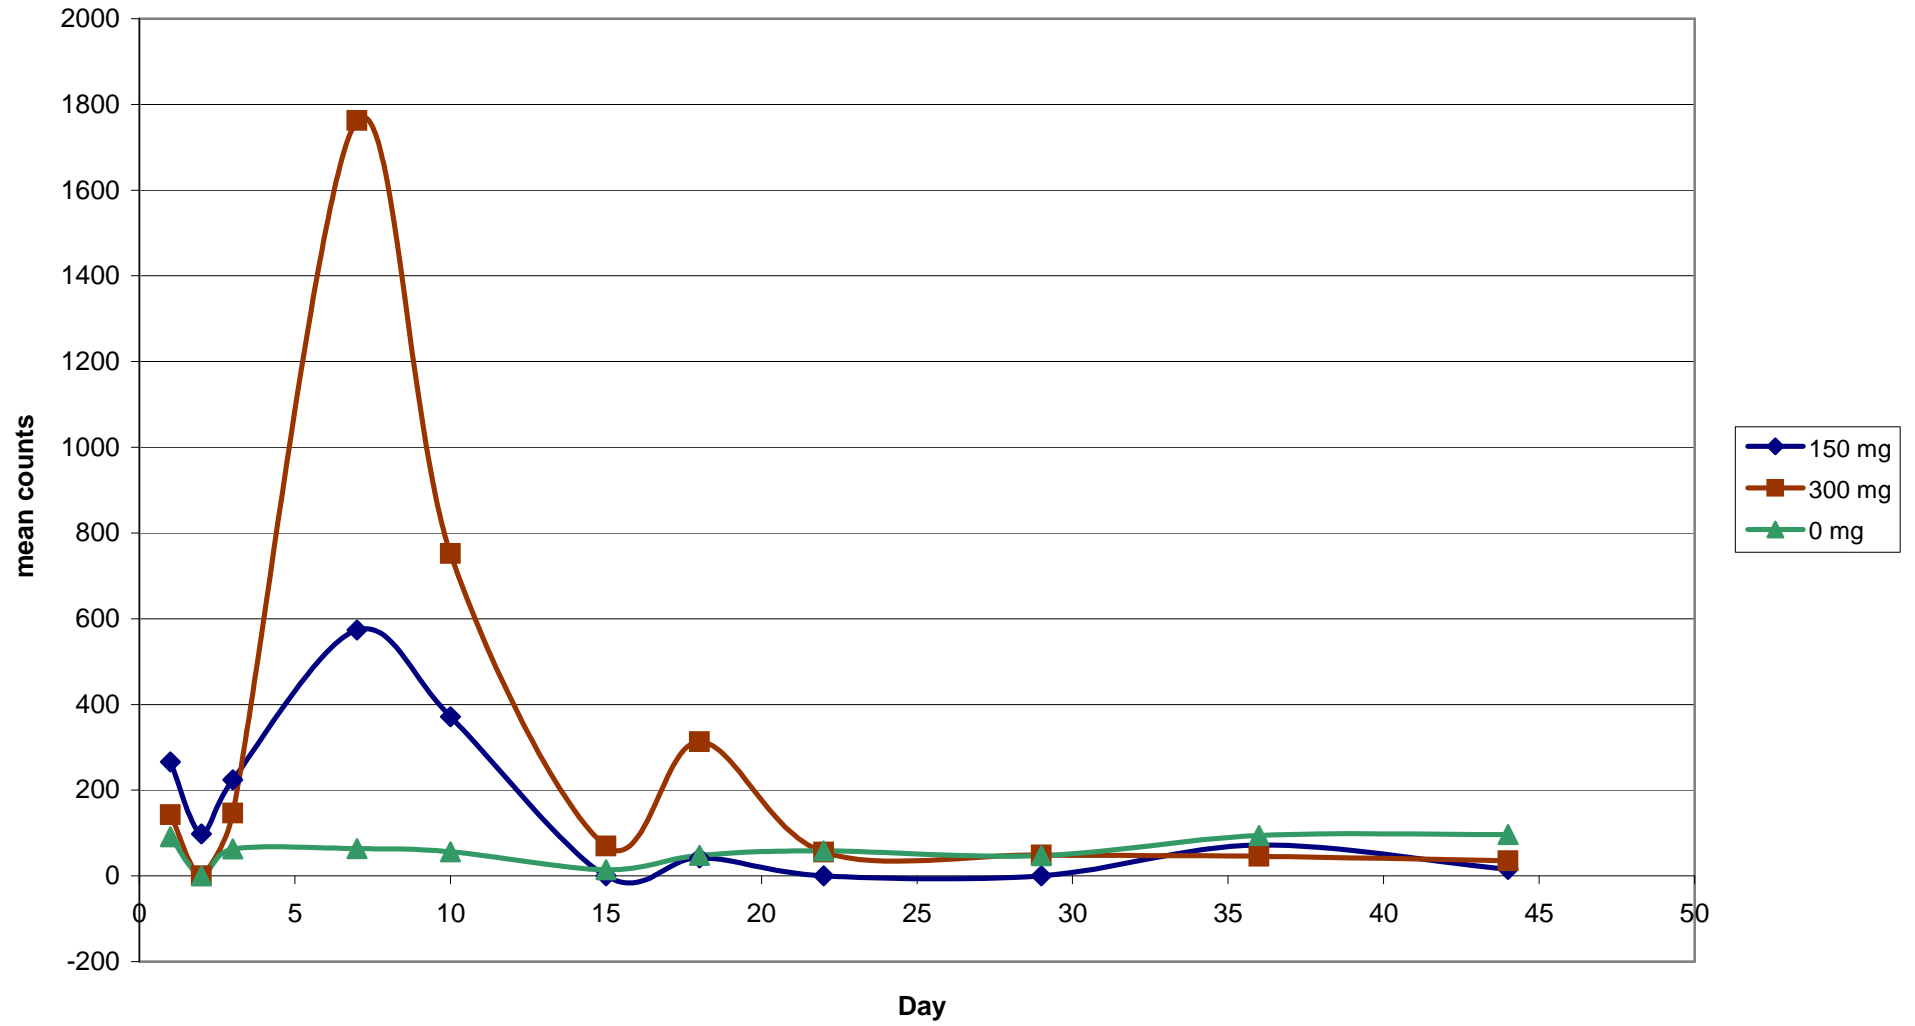

ID 12702

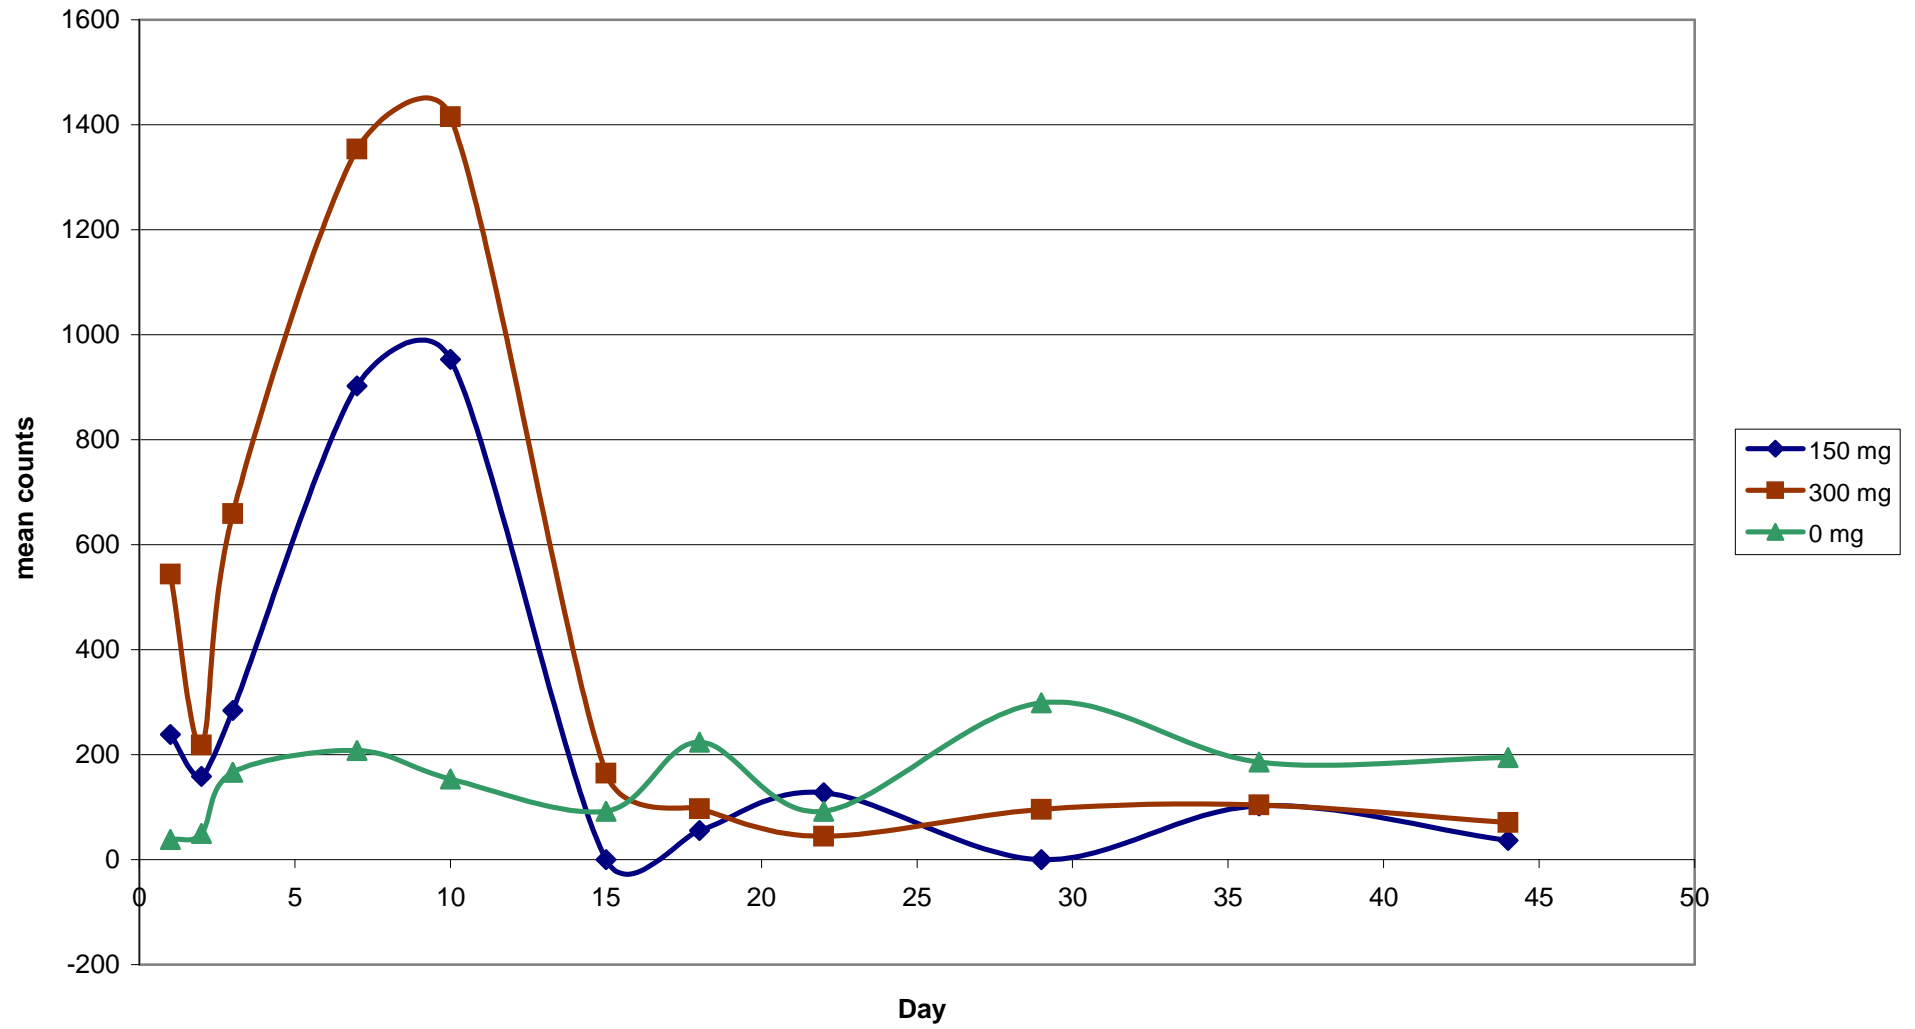



ID 12640

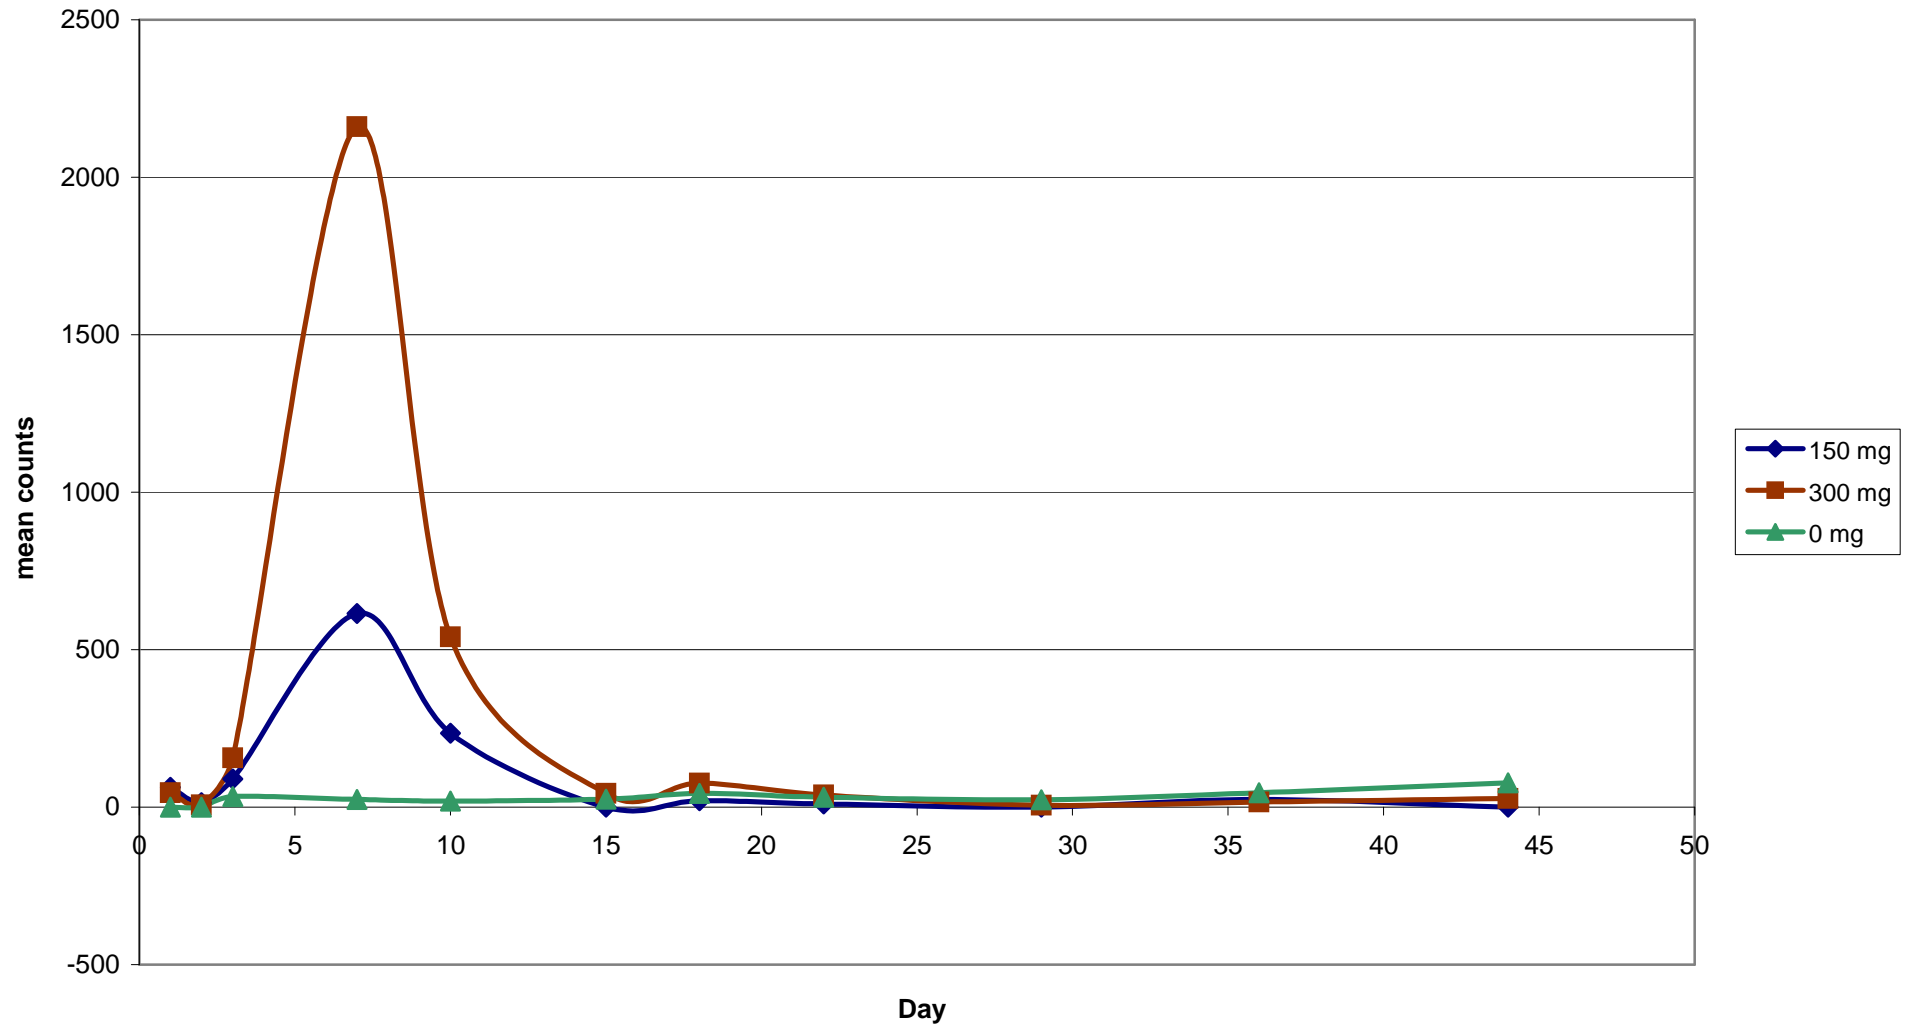

ID 12311

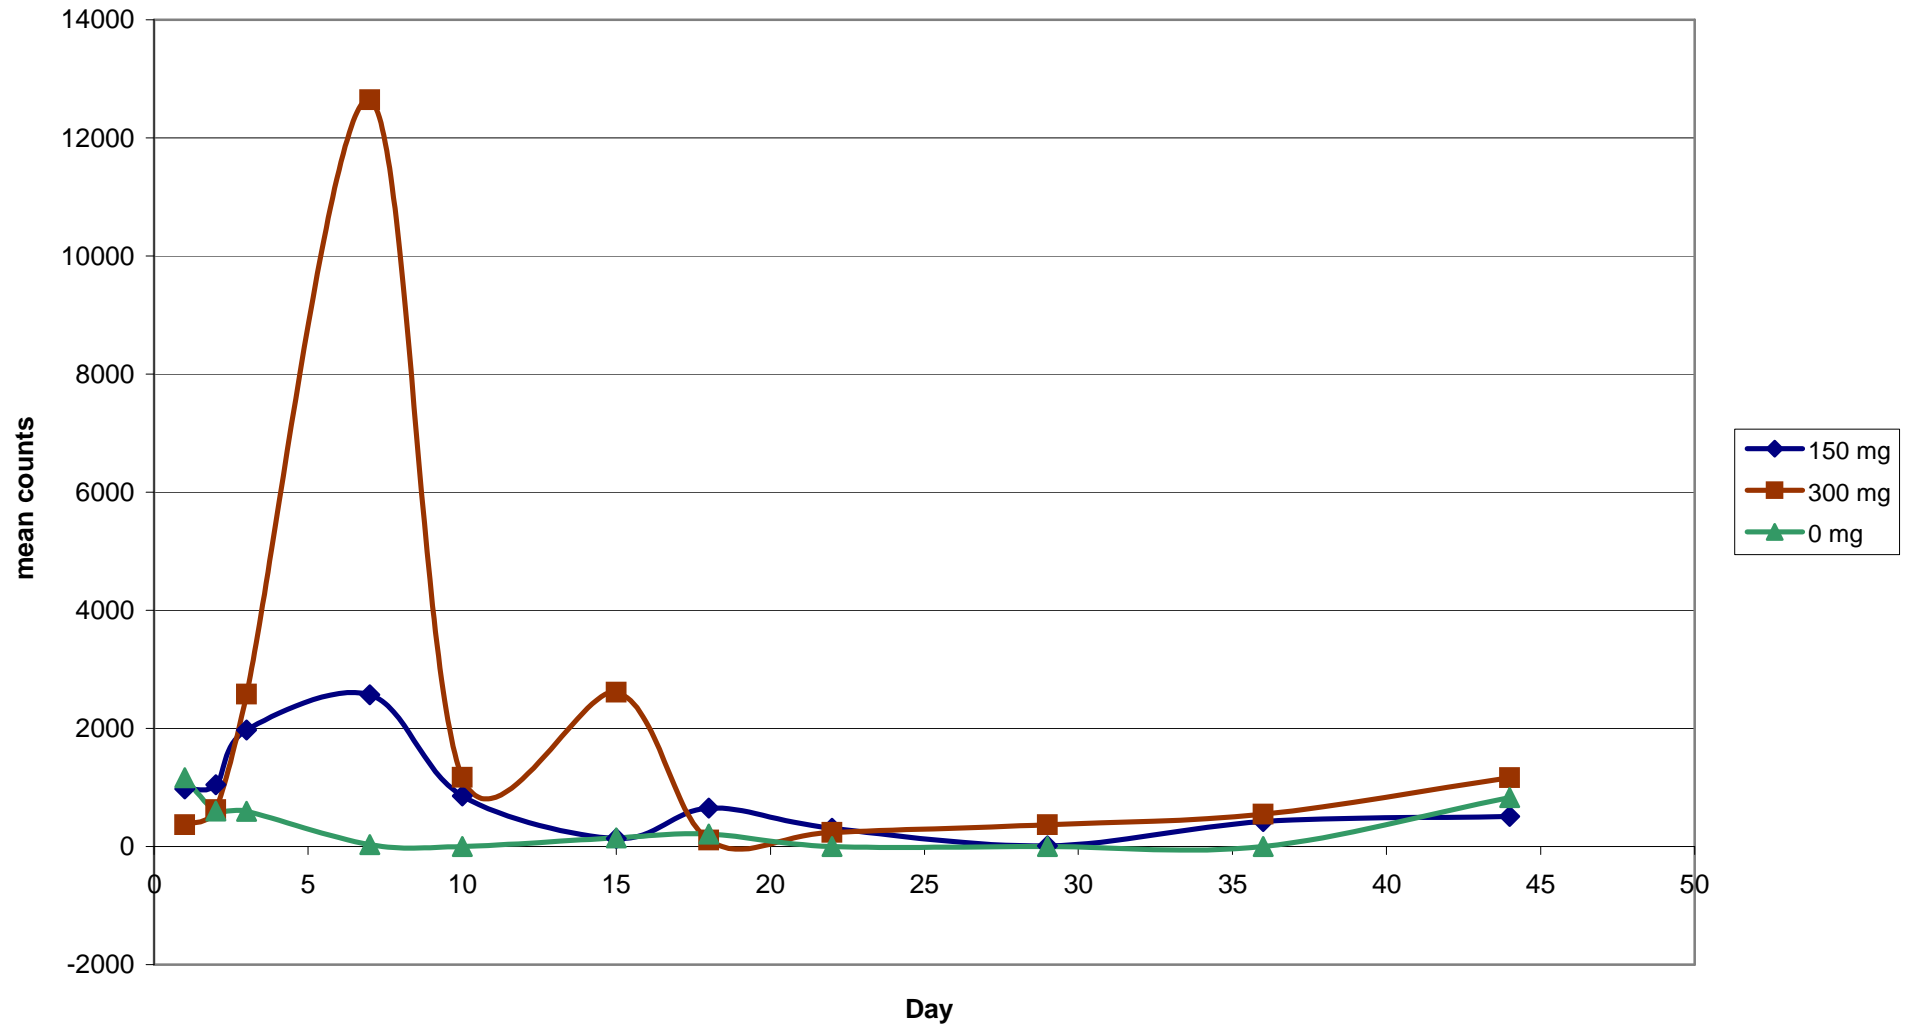

ID 12212

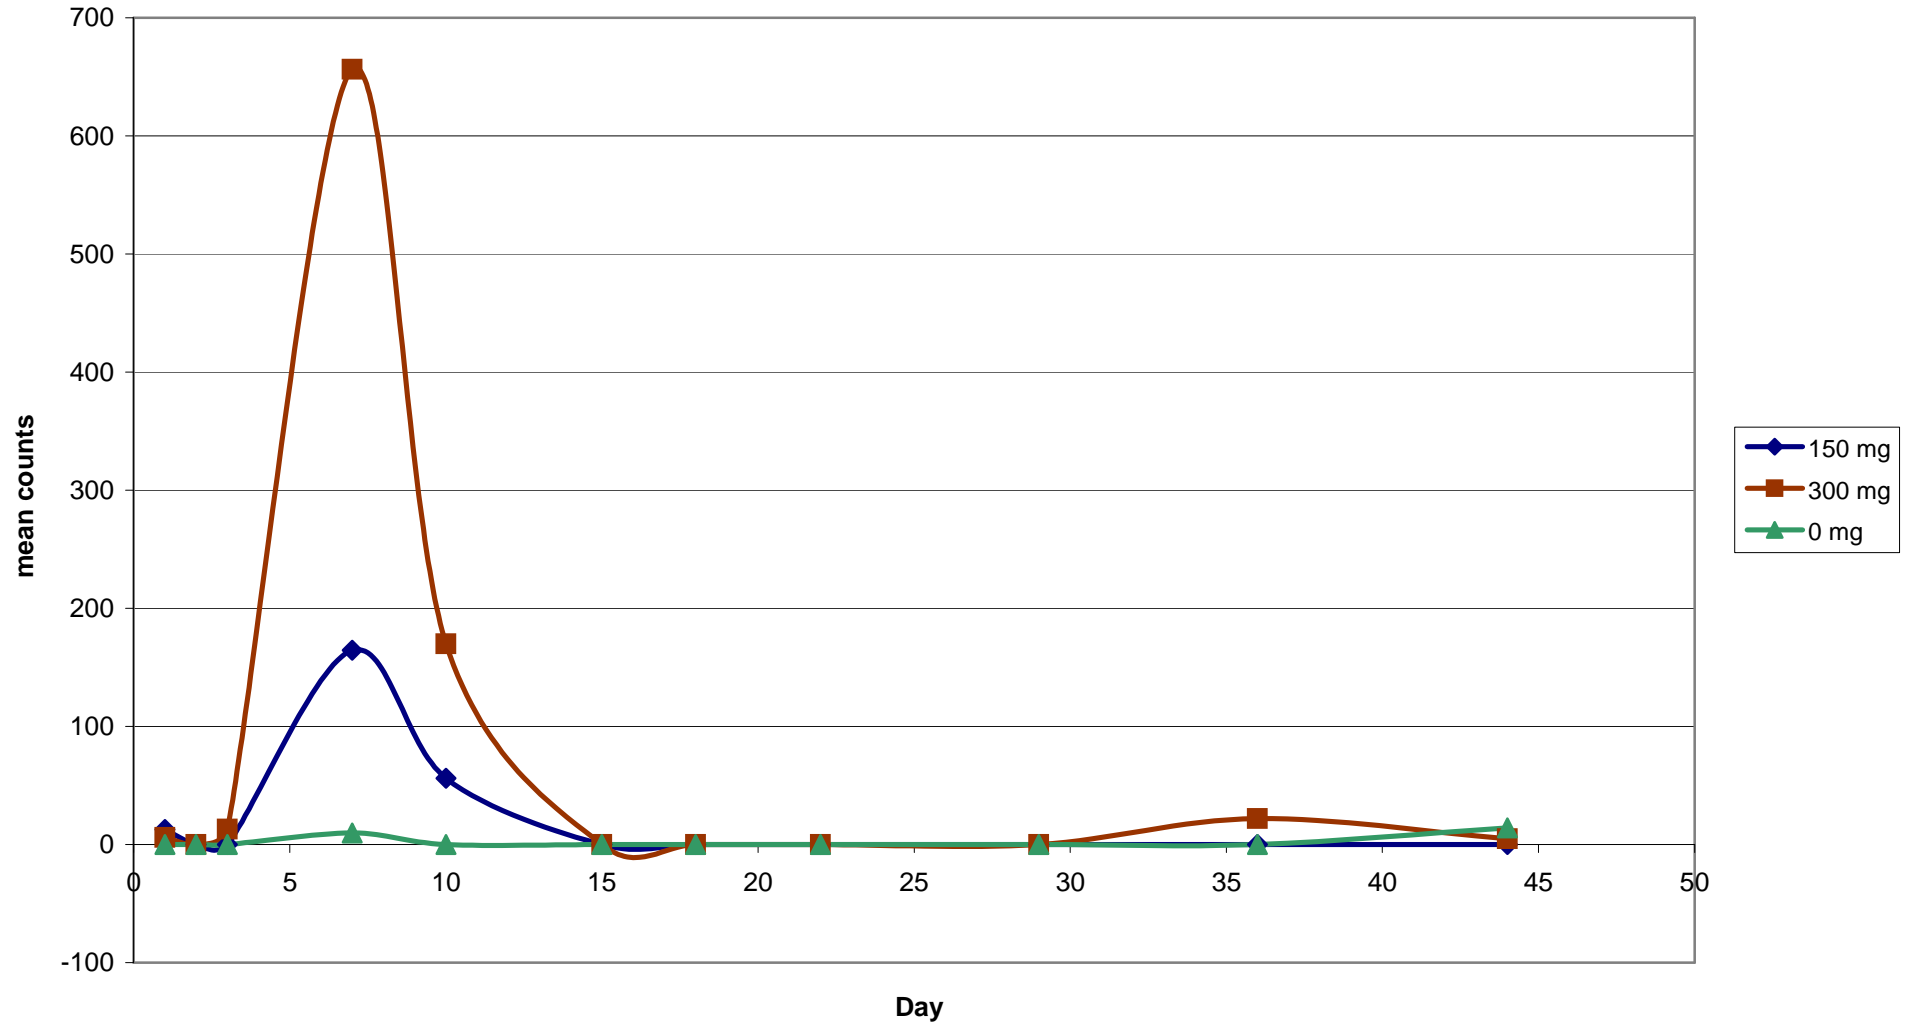

ID 11896

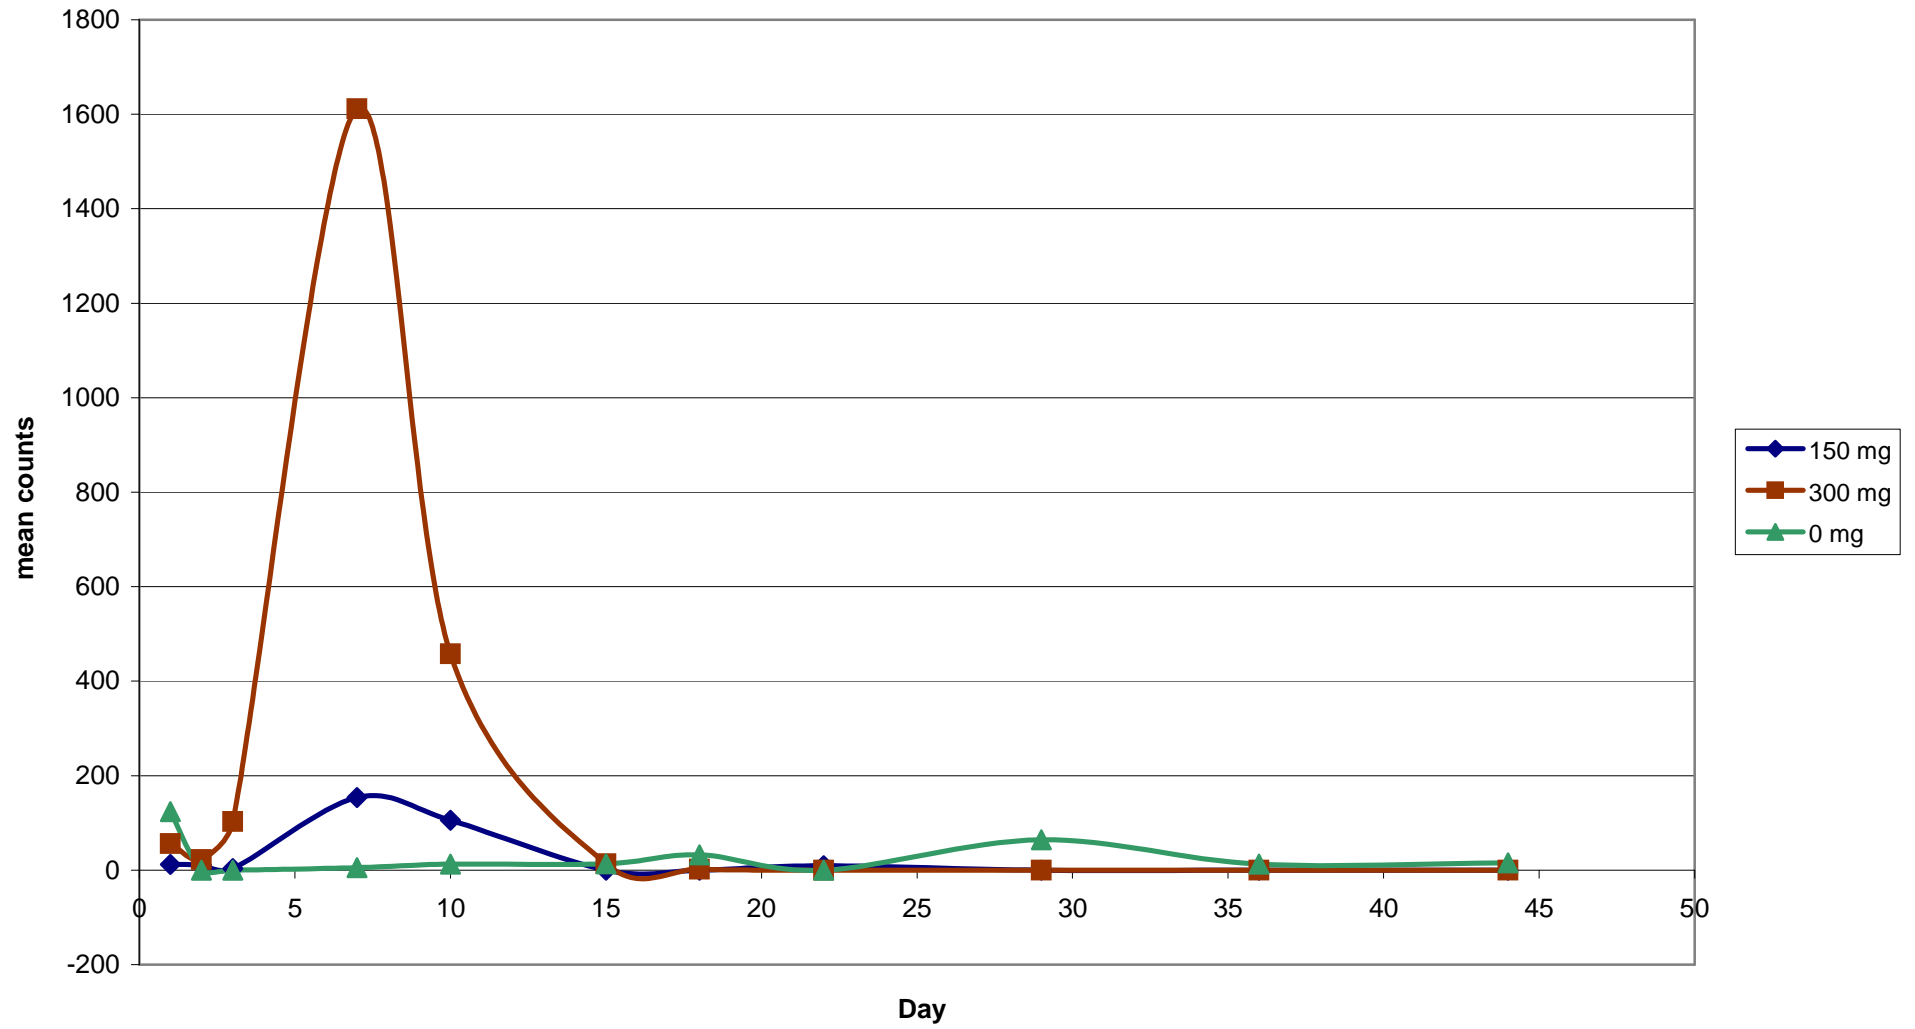

ID 11644

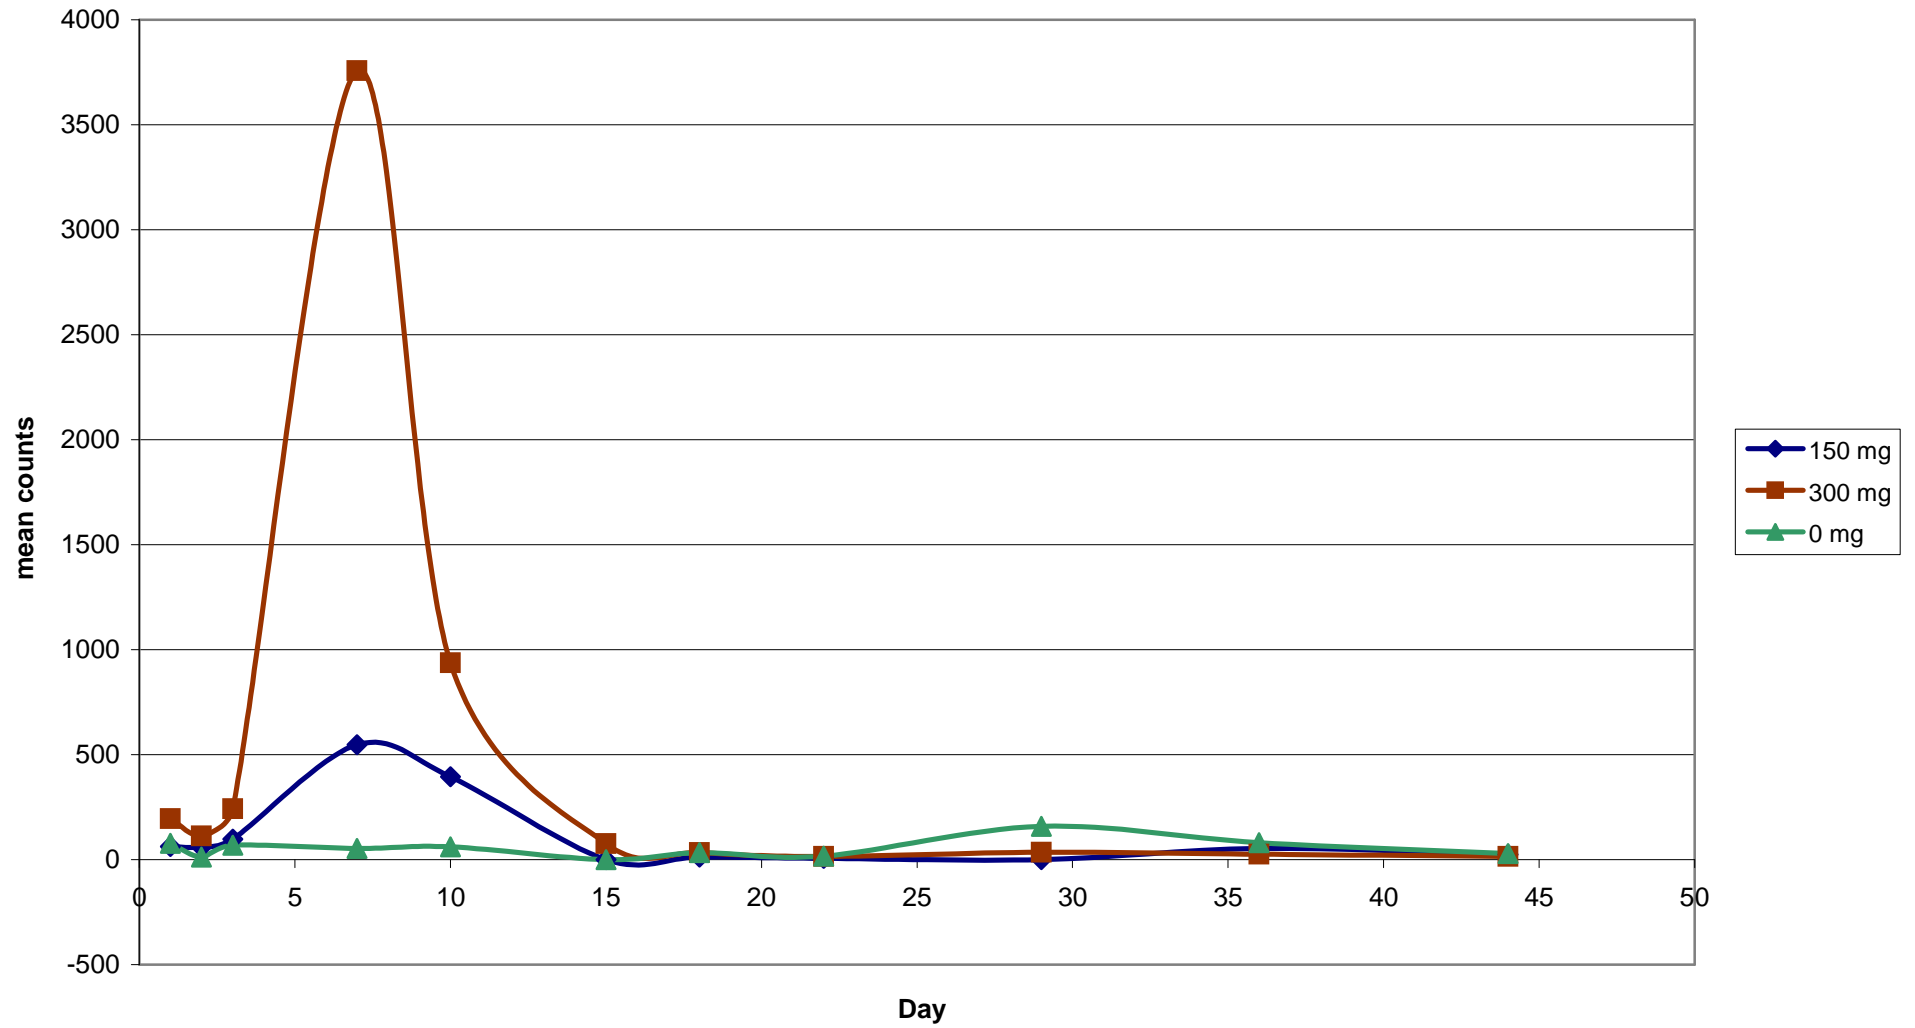

ID 11628

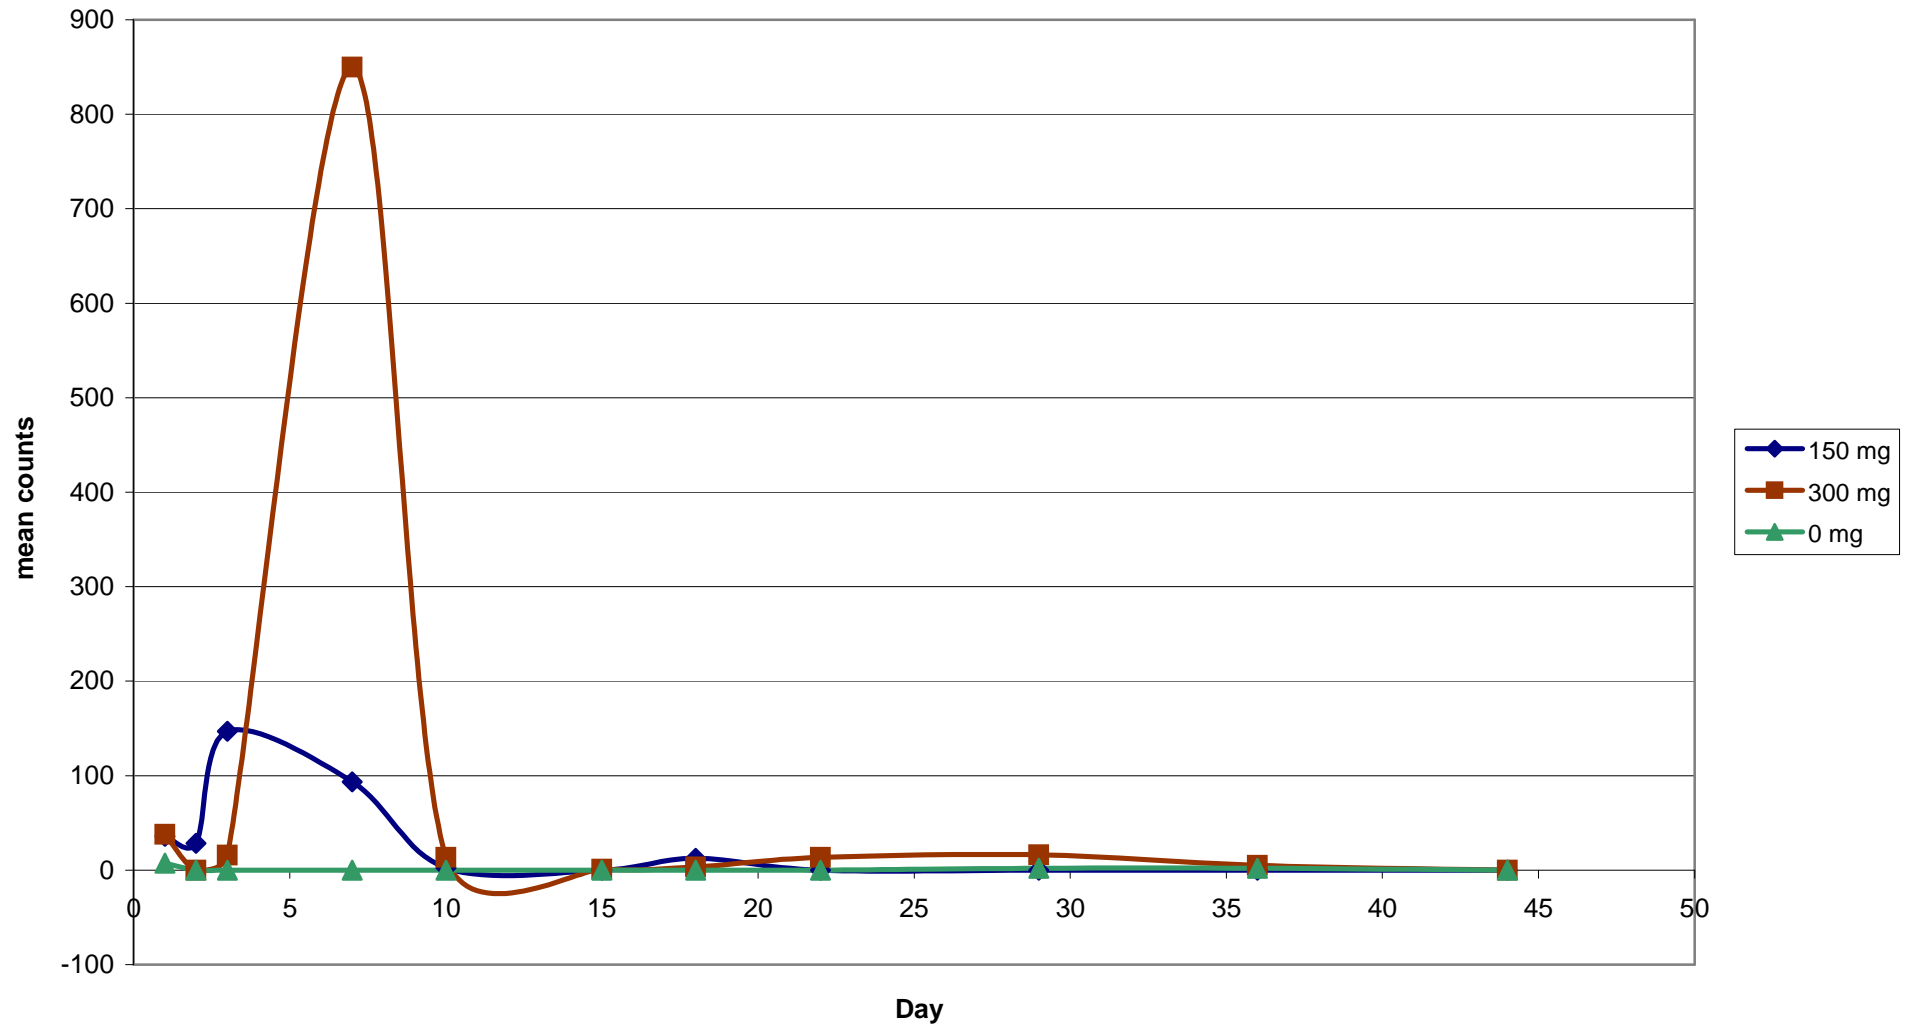

ID 11342

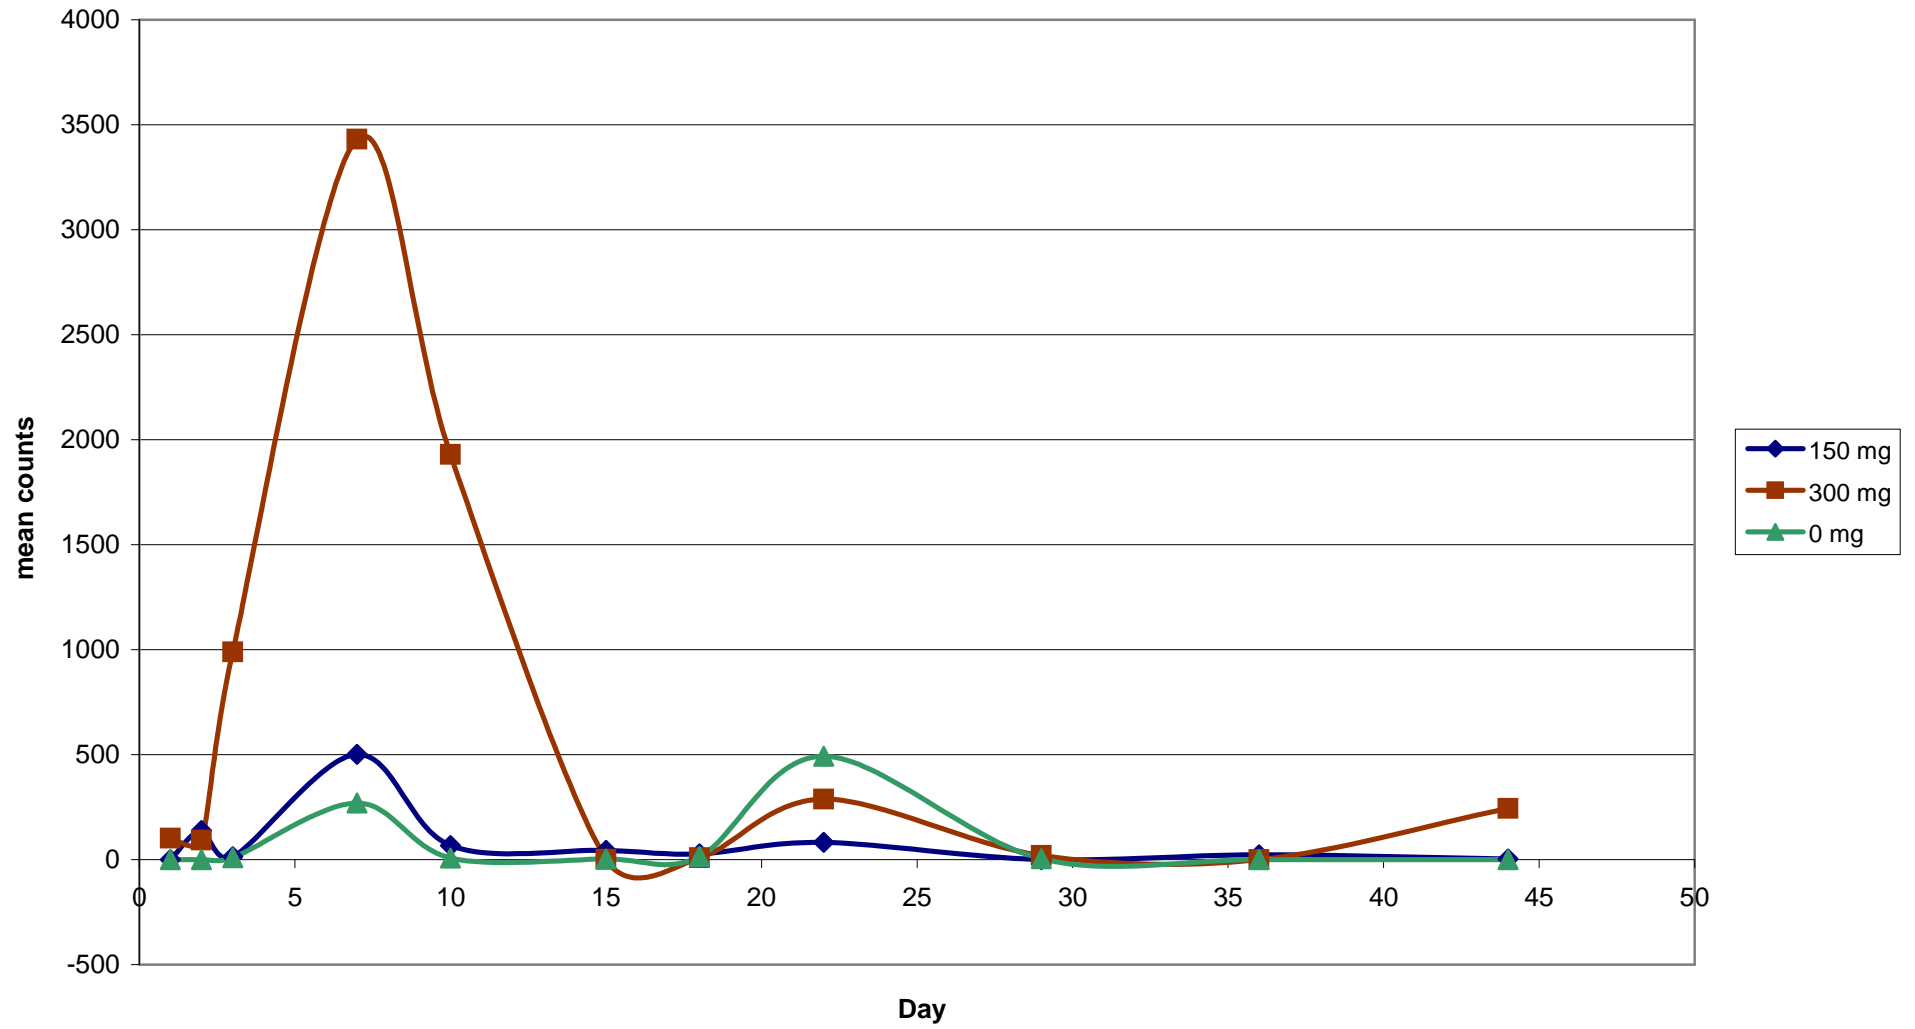

ID 11117

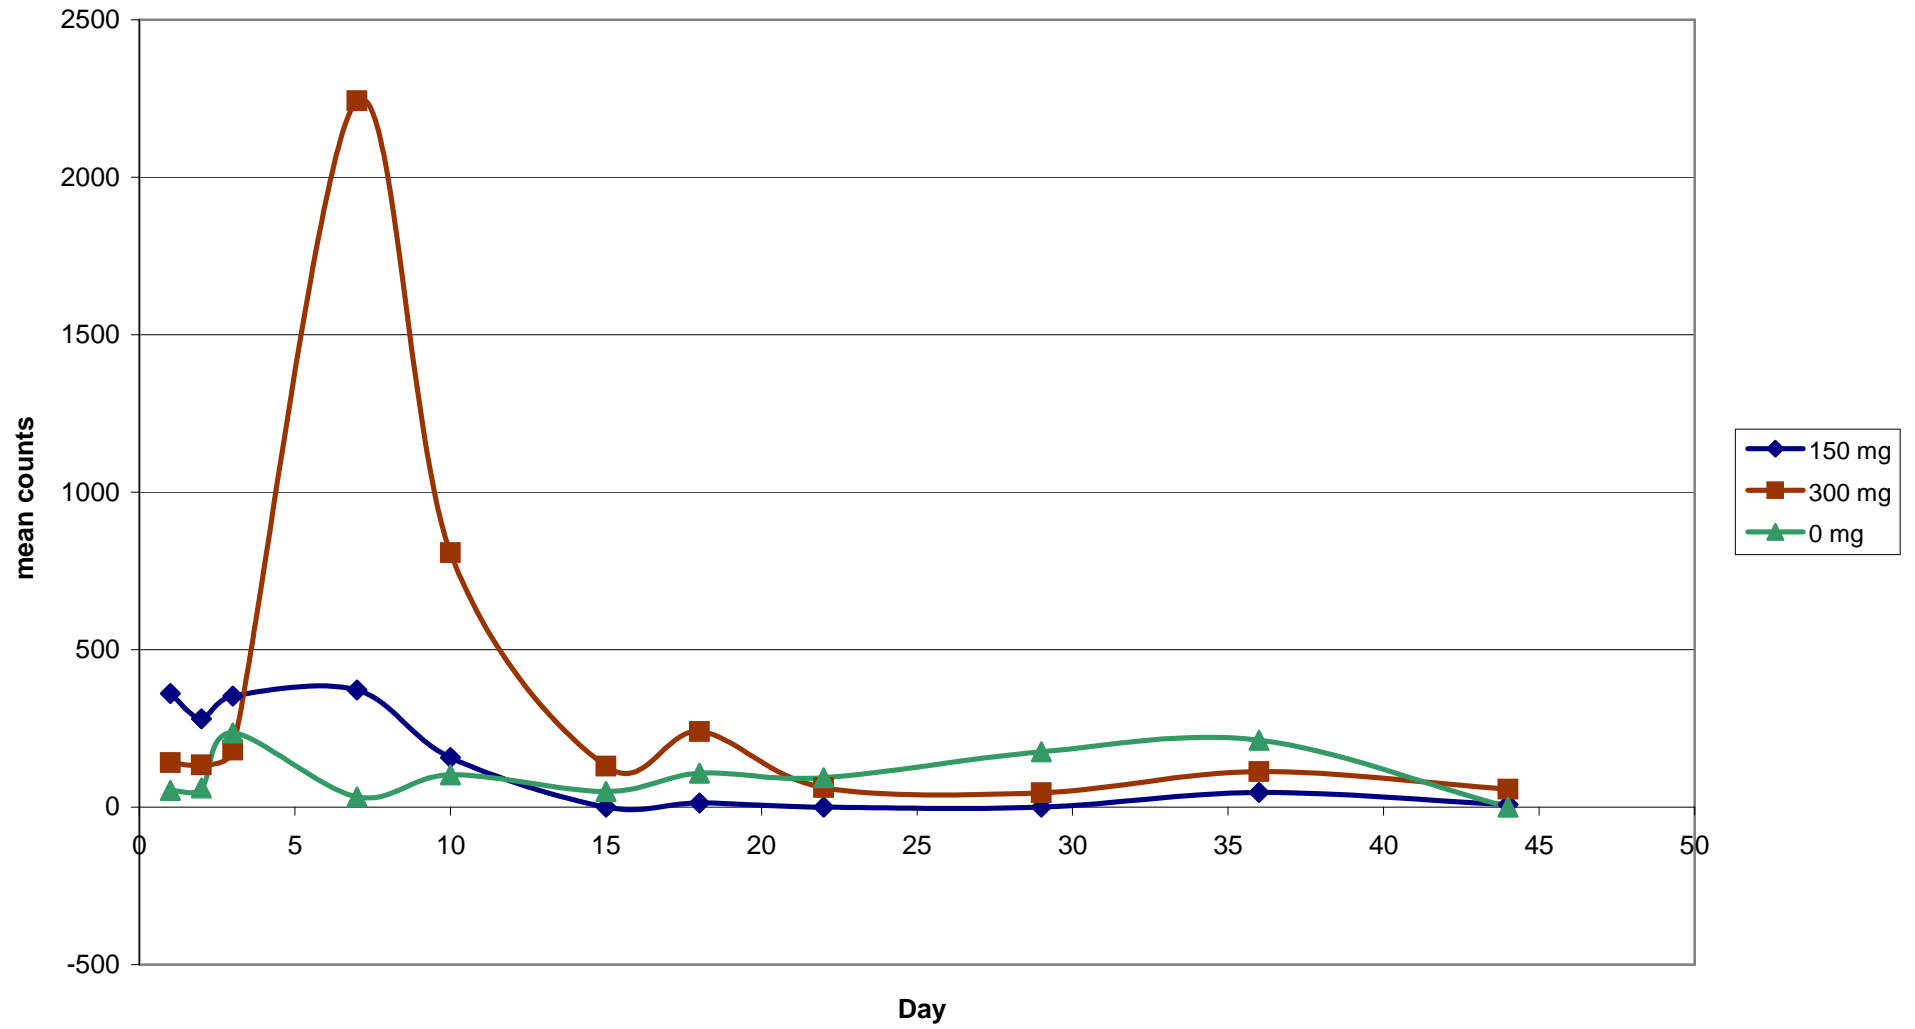



ID 11068

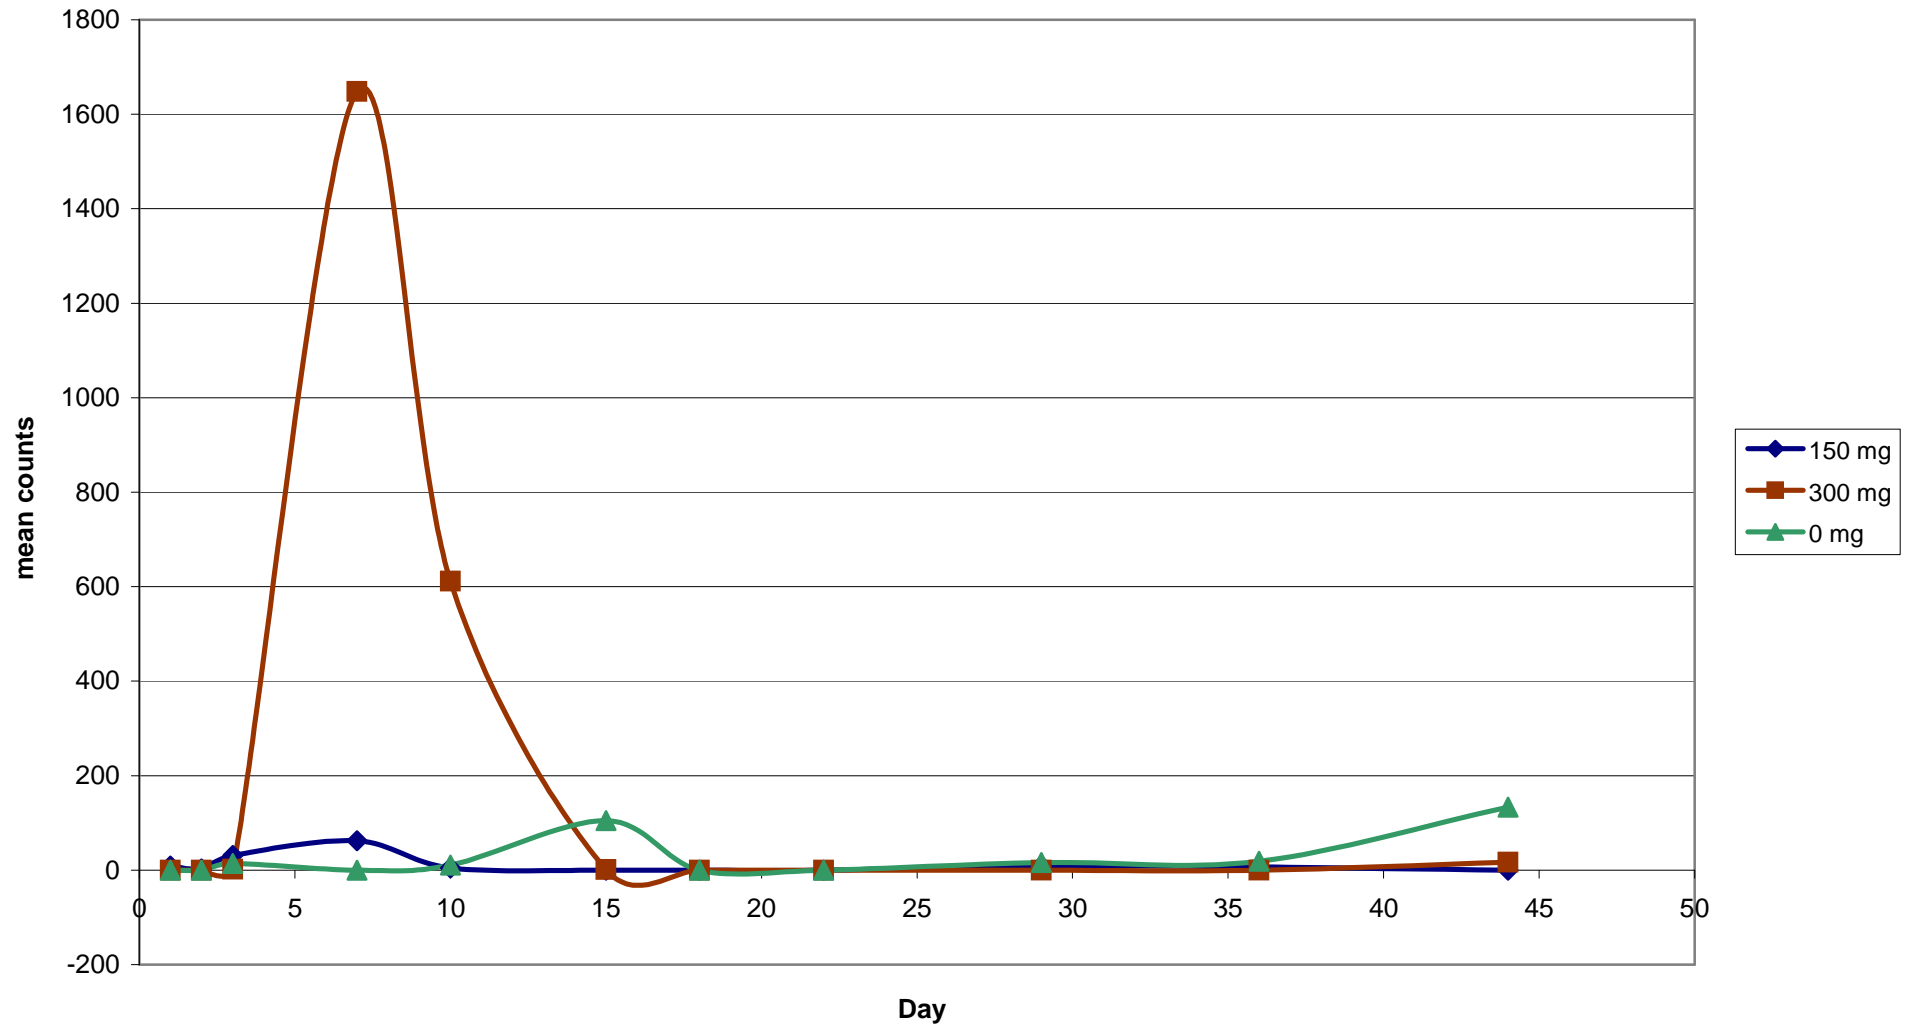

ID 10732

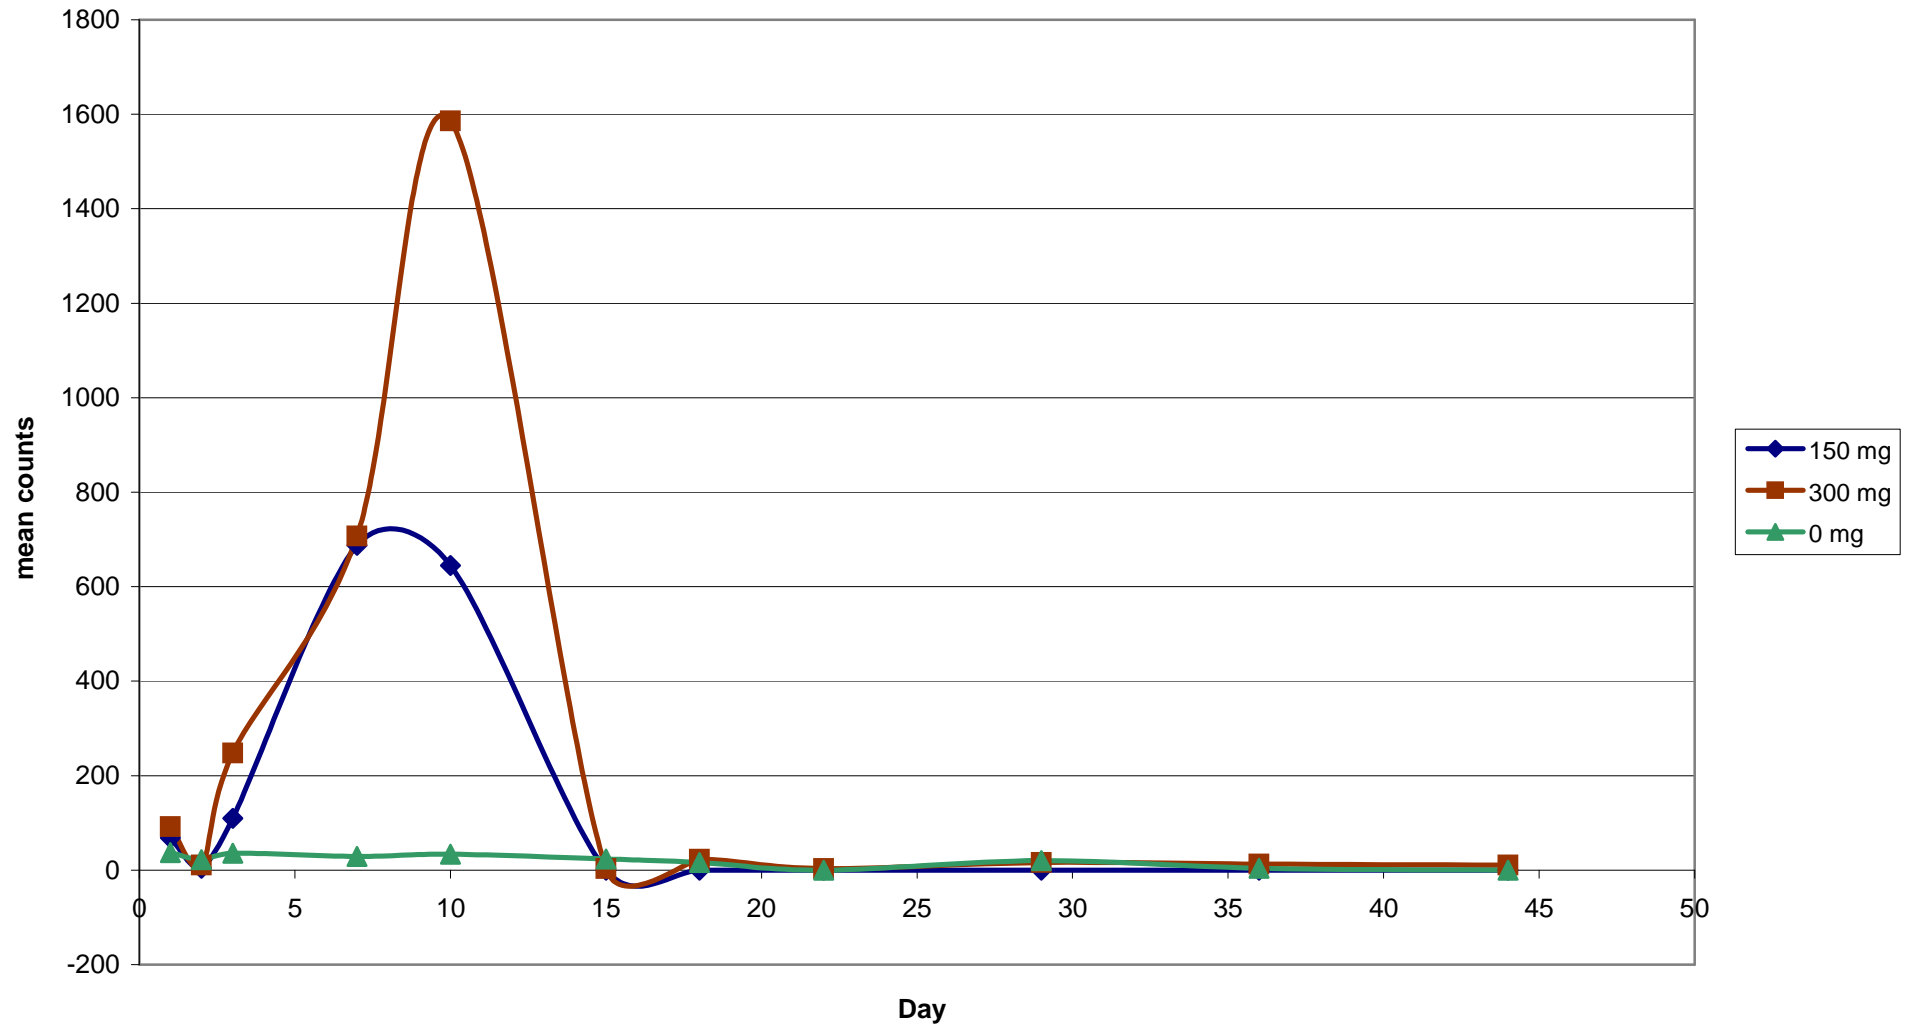

ID 10472

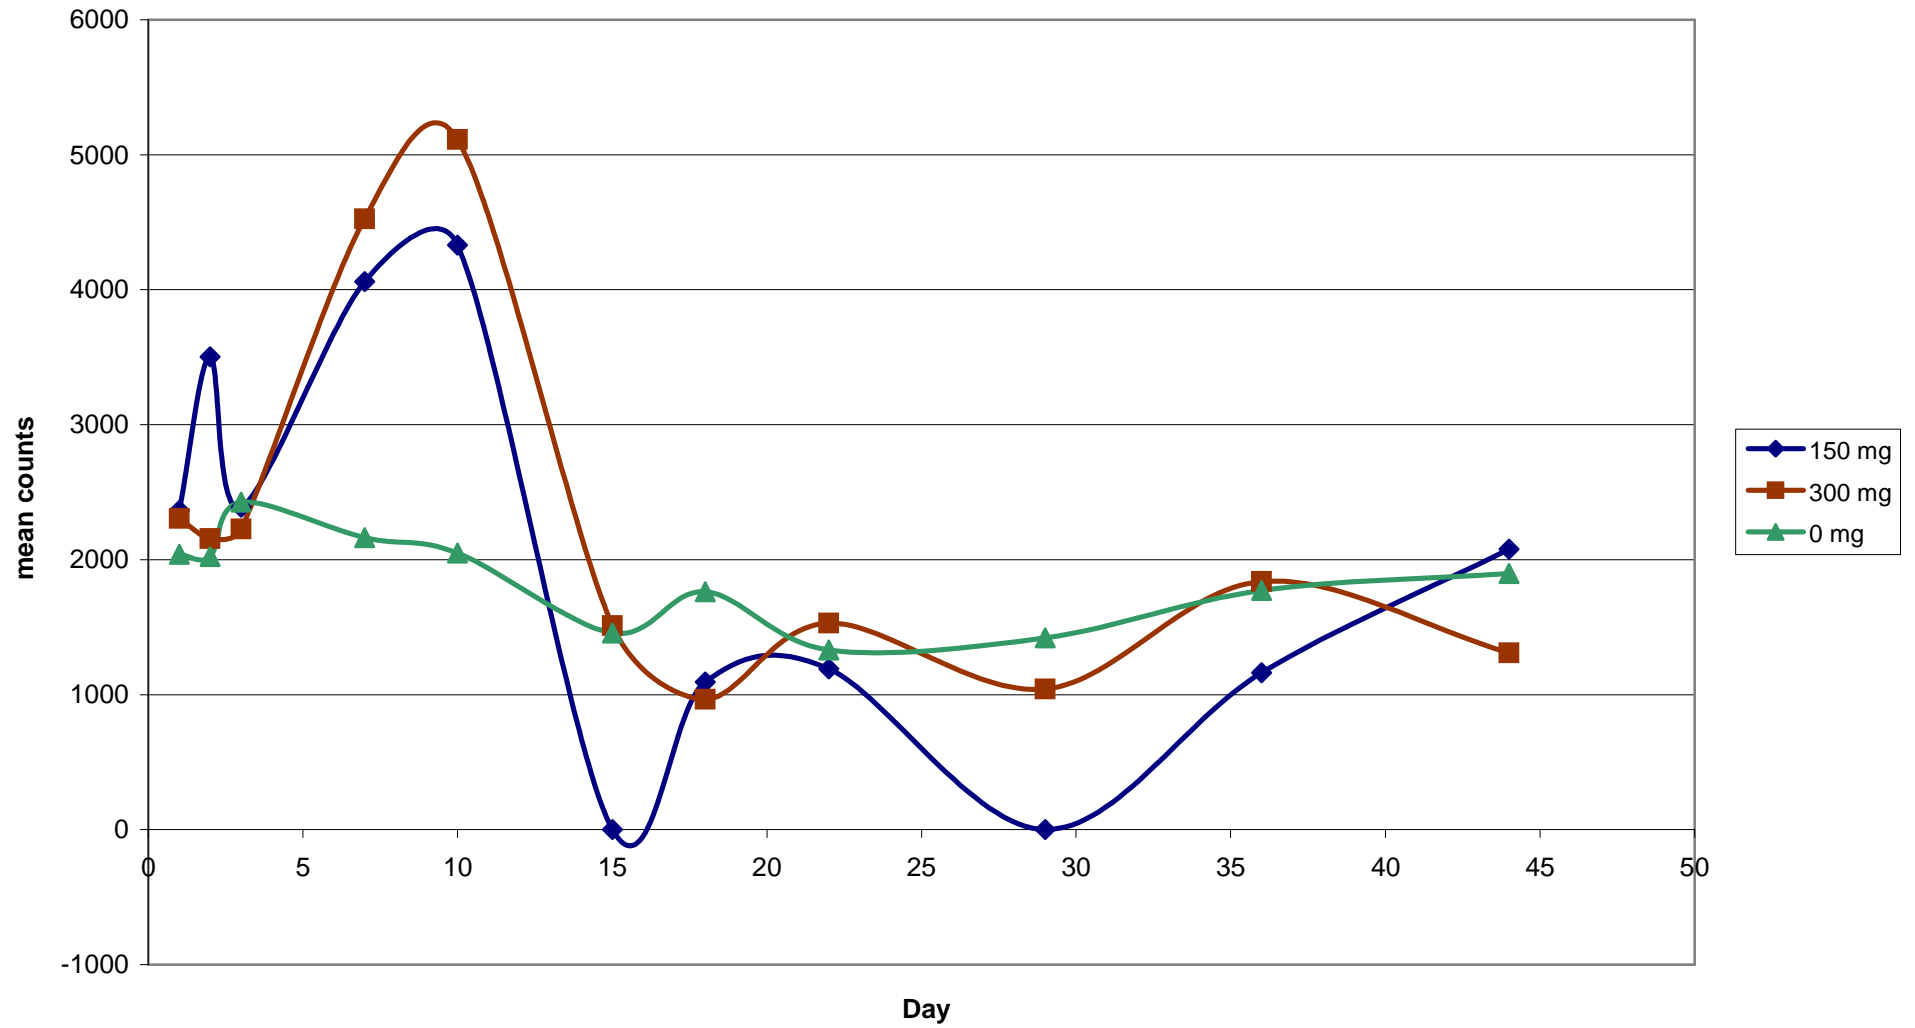

# ID 10405

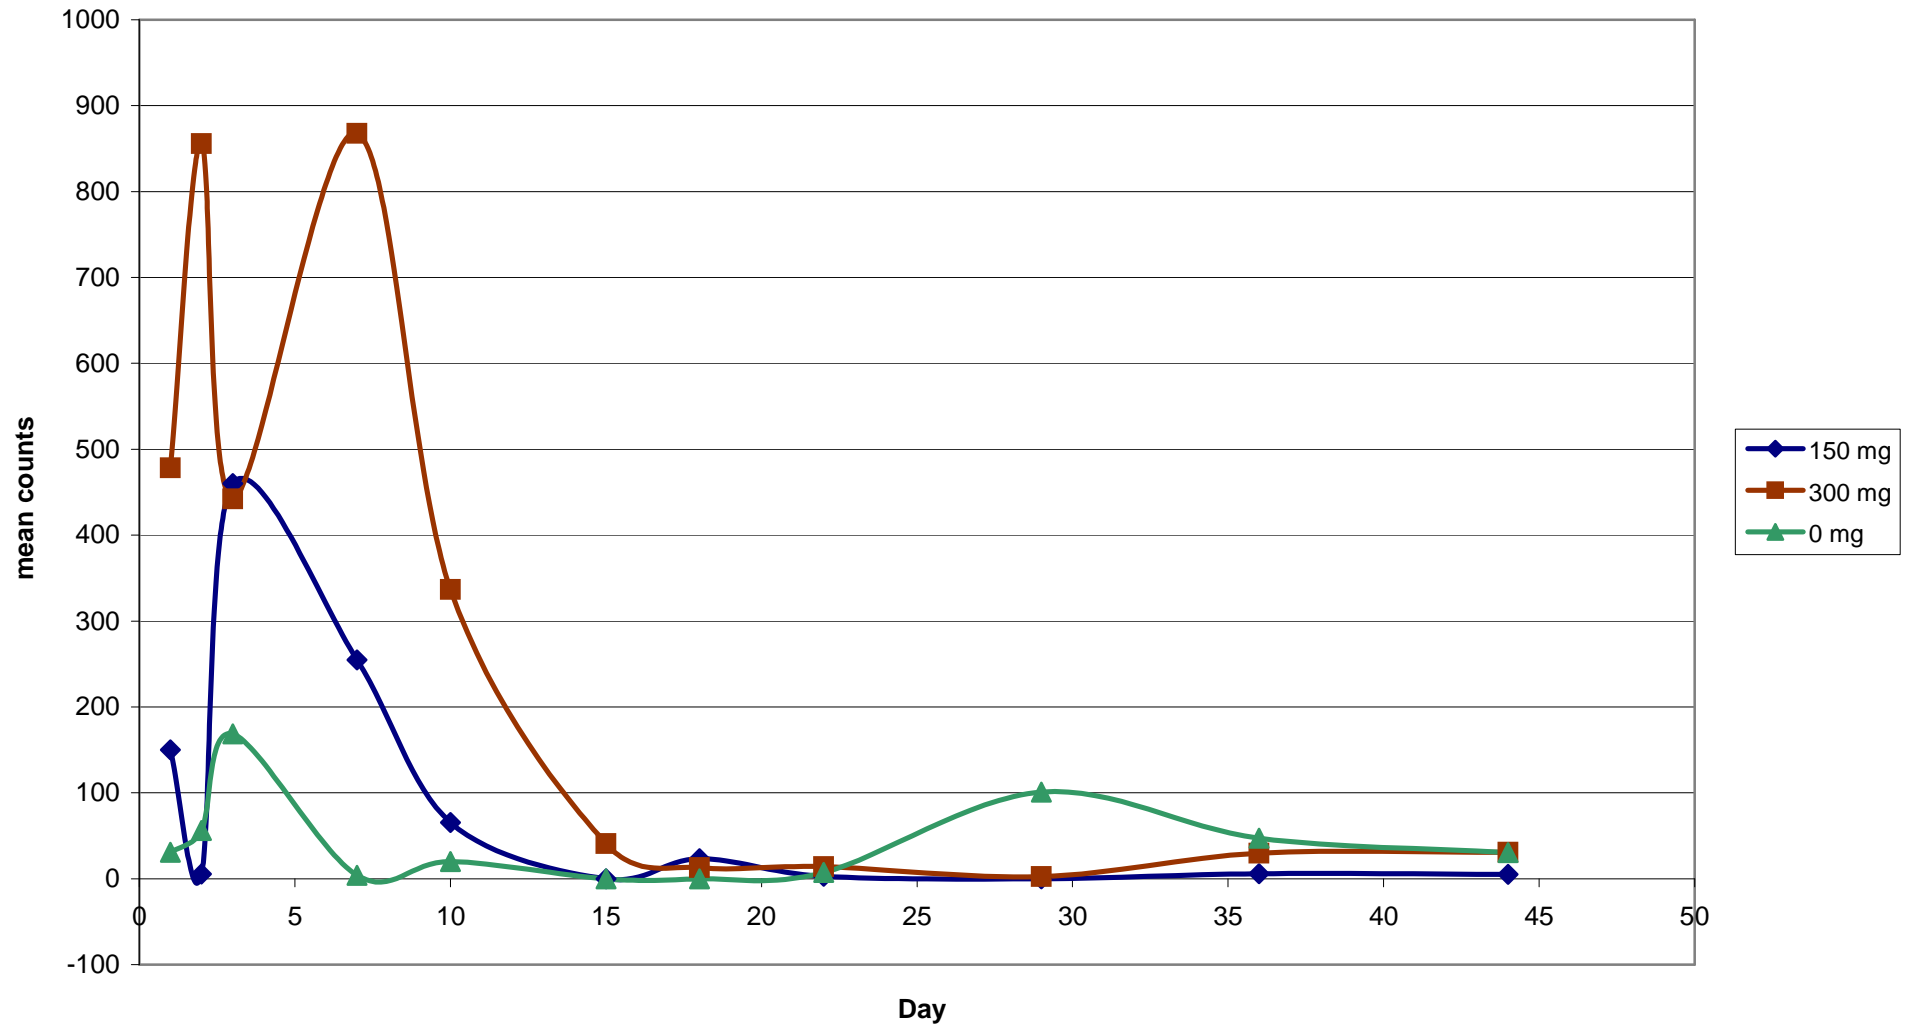

ID 10377

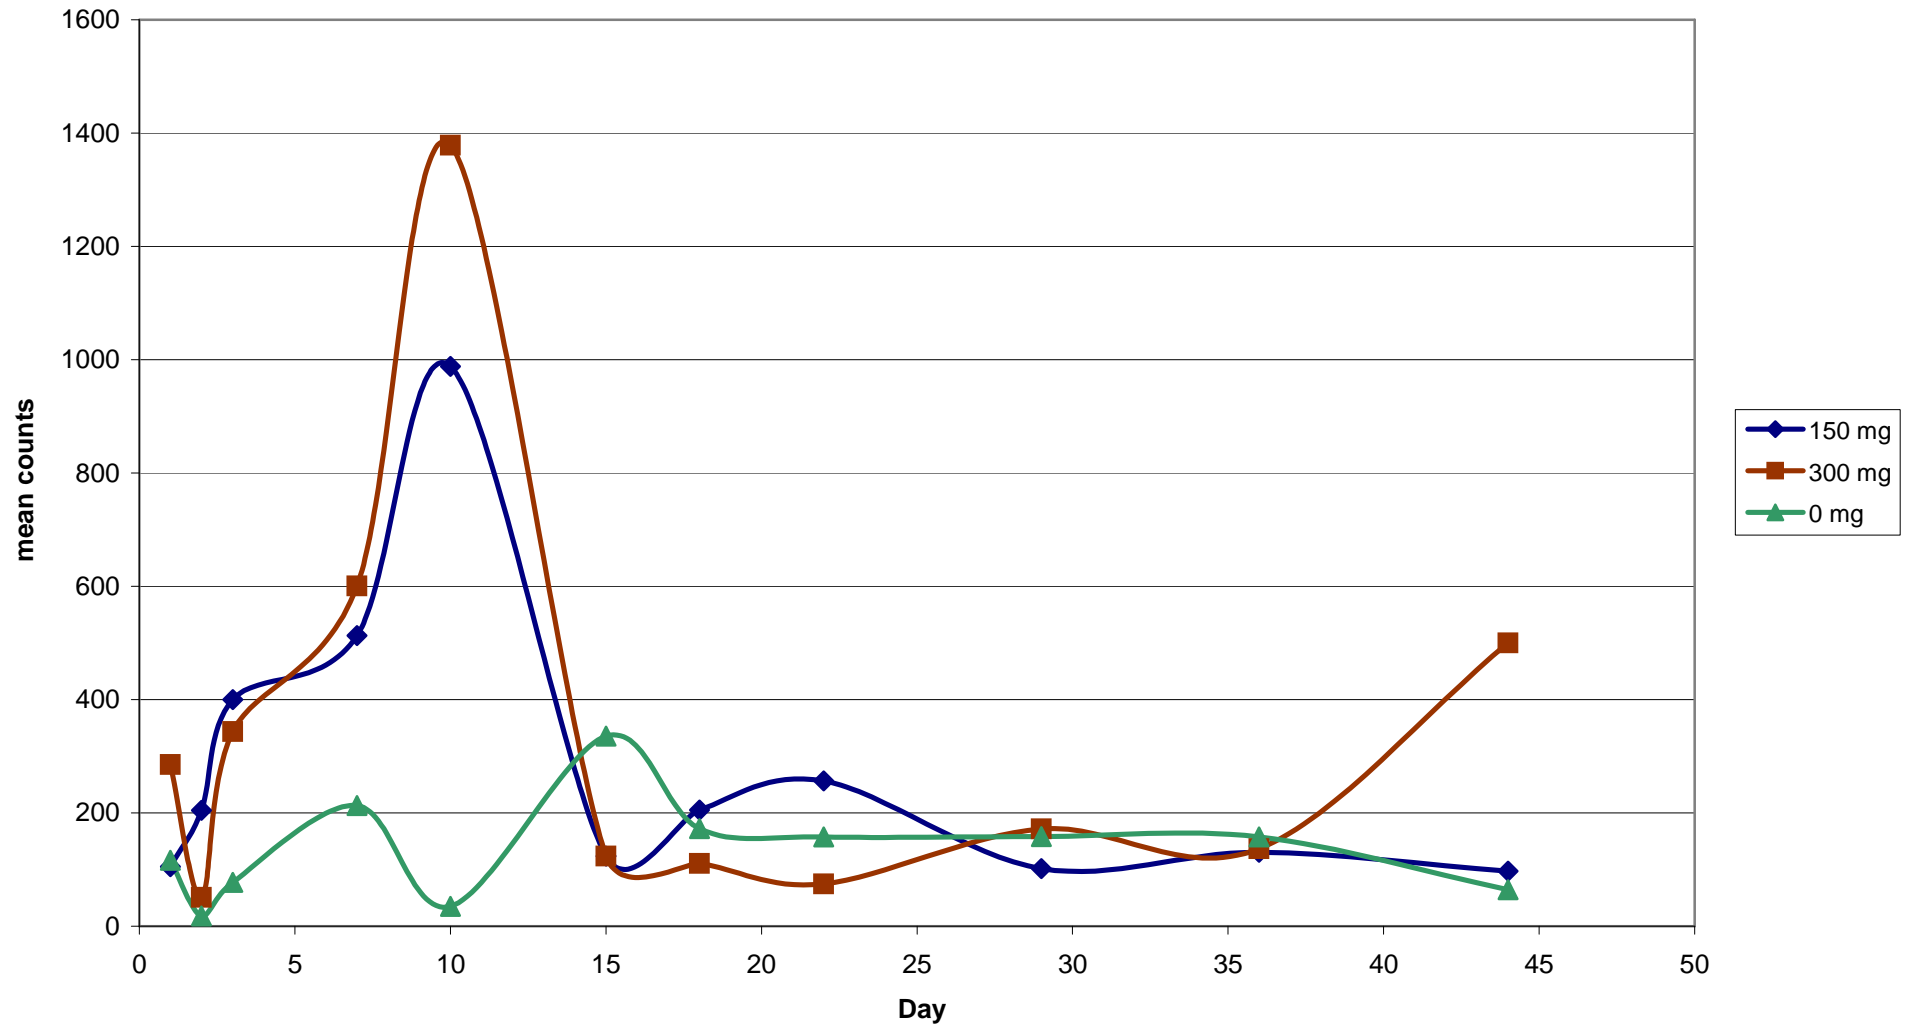

ID 10241

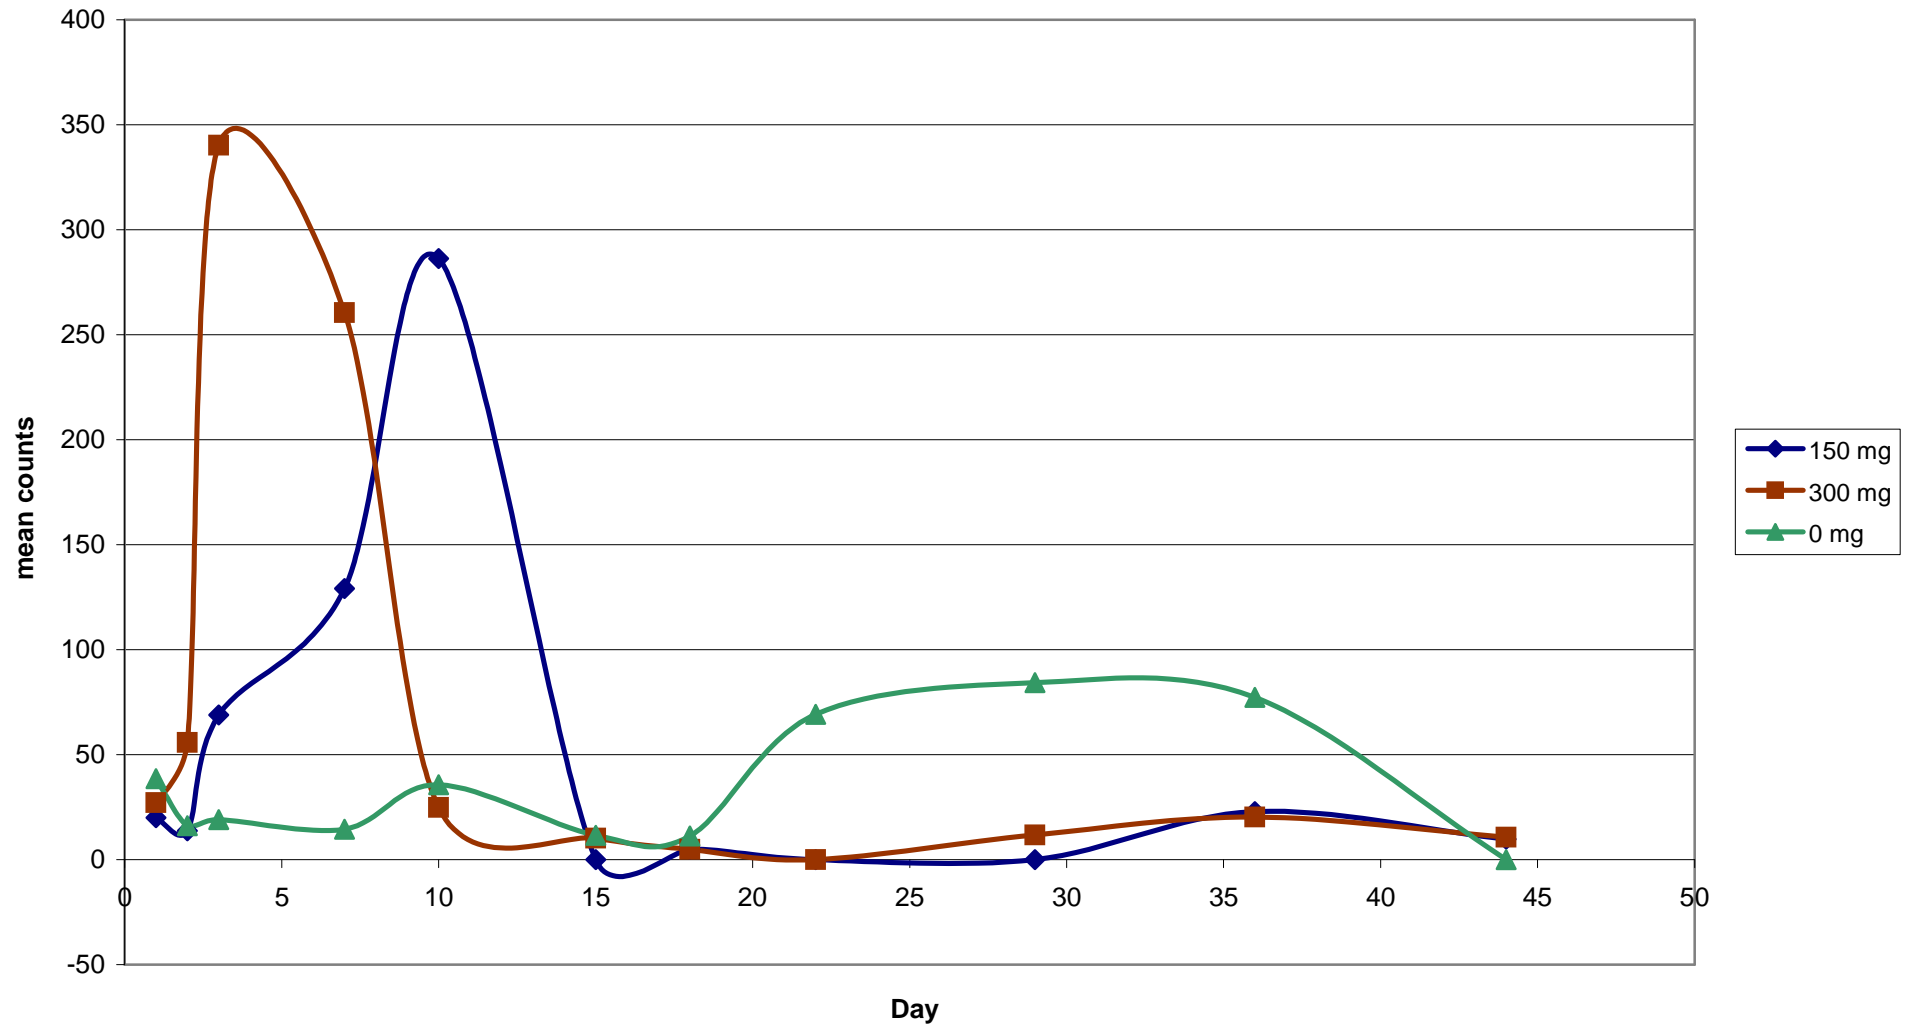

ID 10240

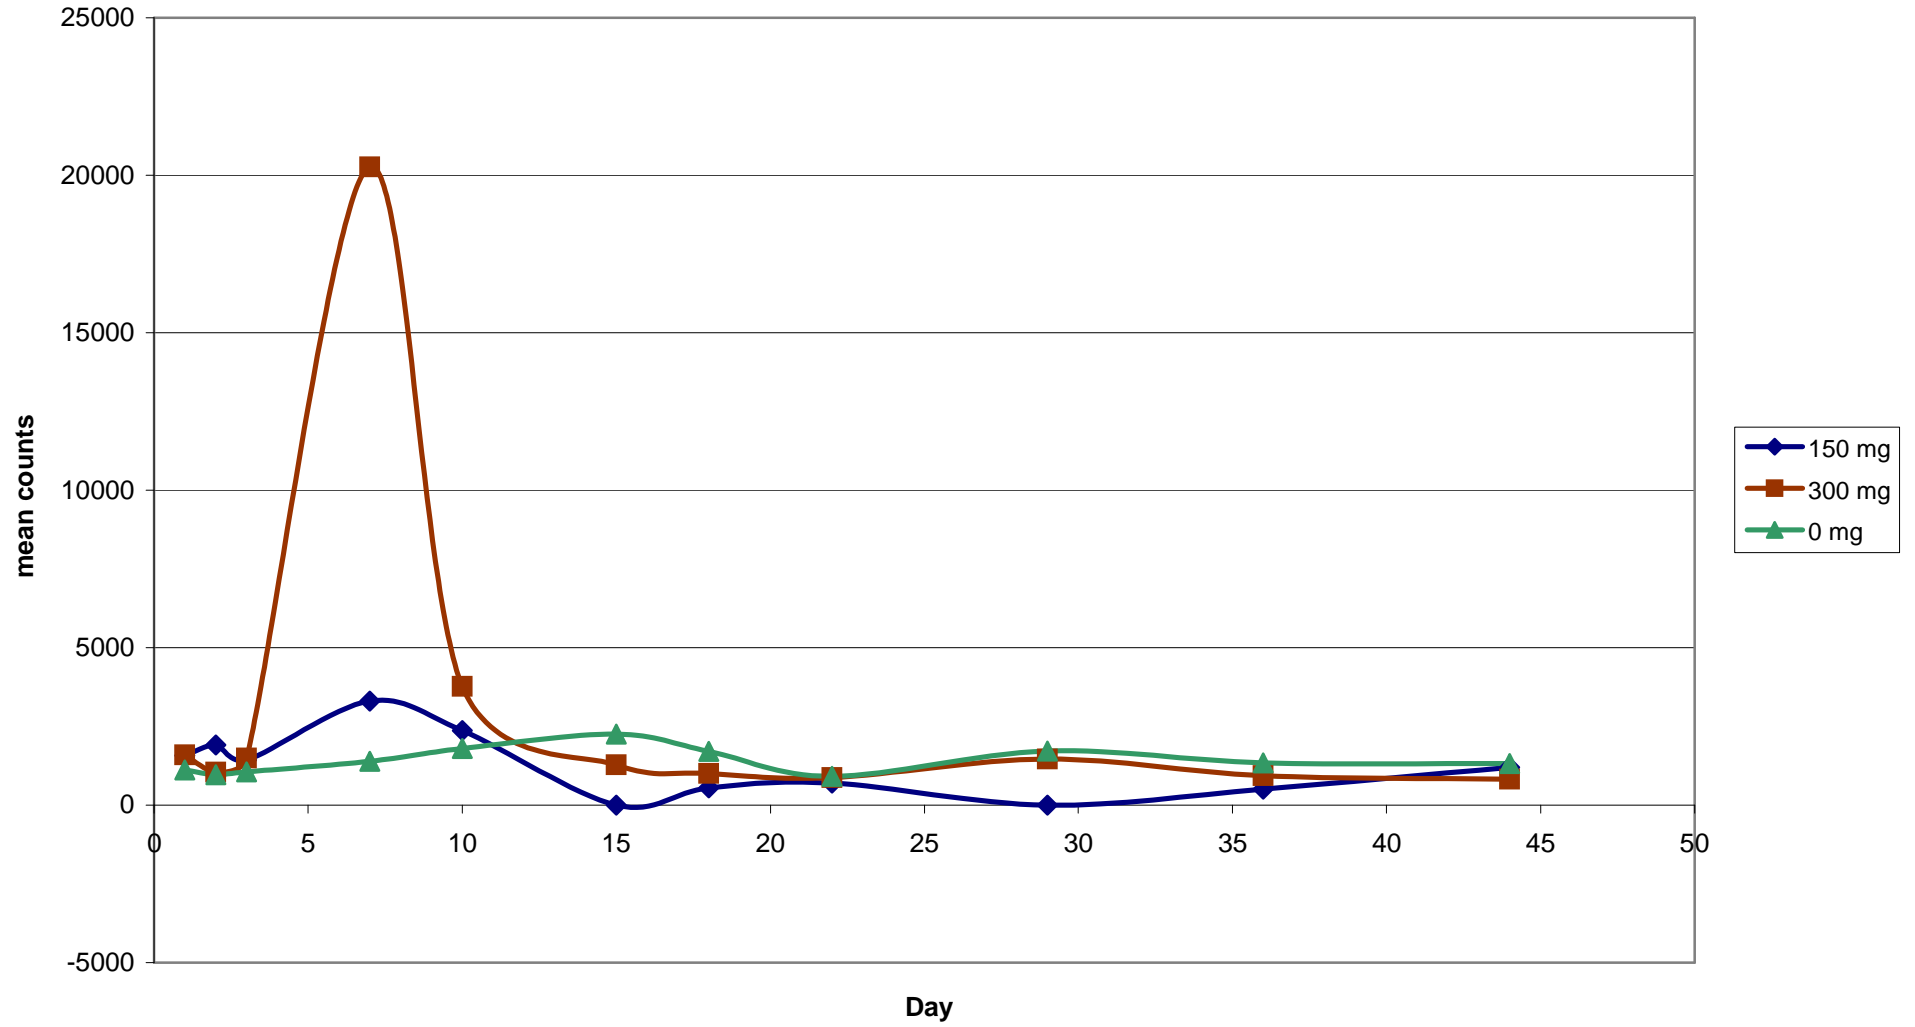

ID 36718

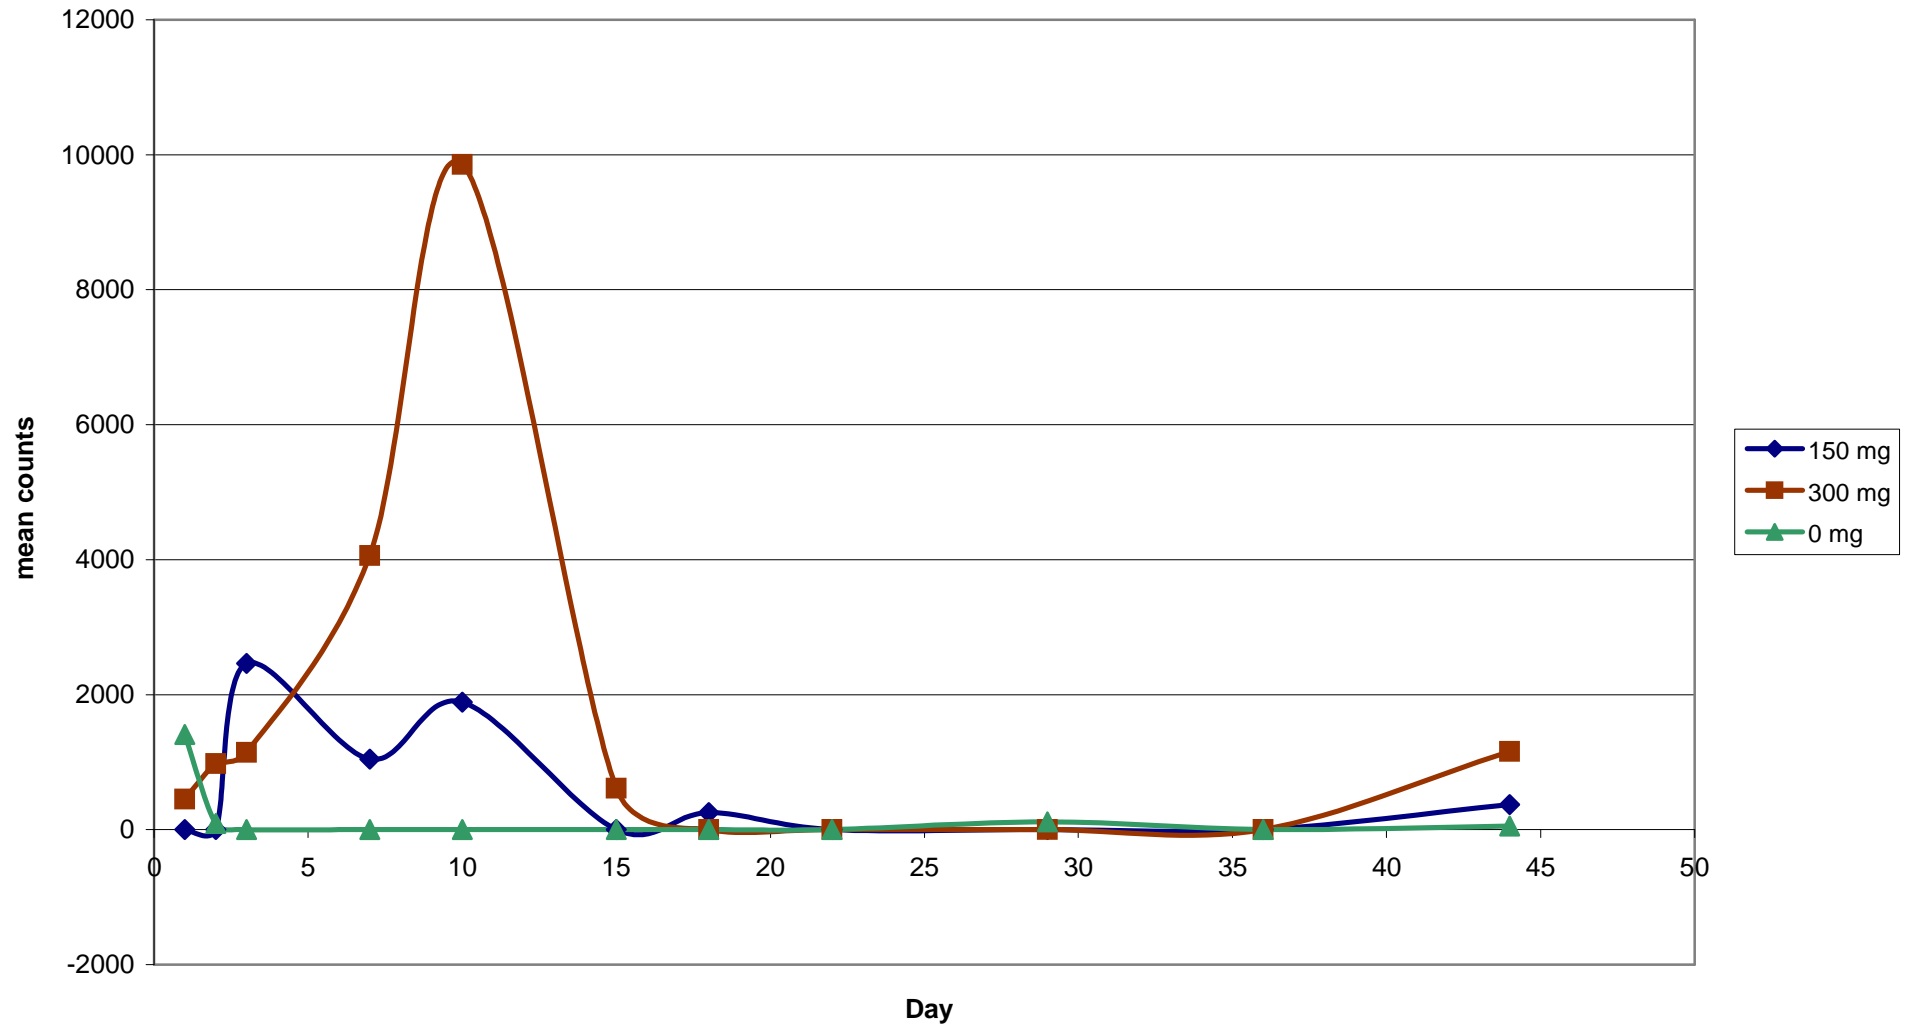



ID 36280

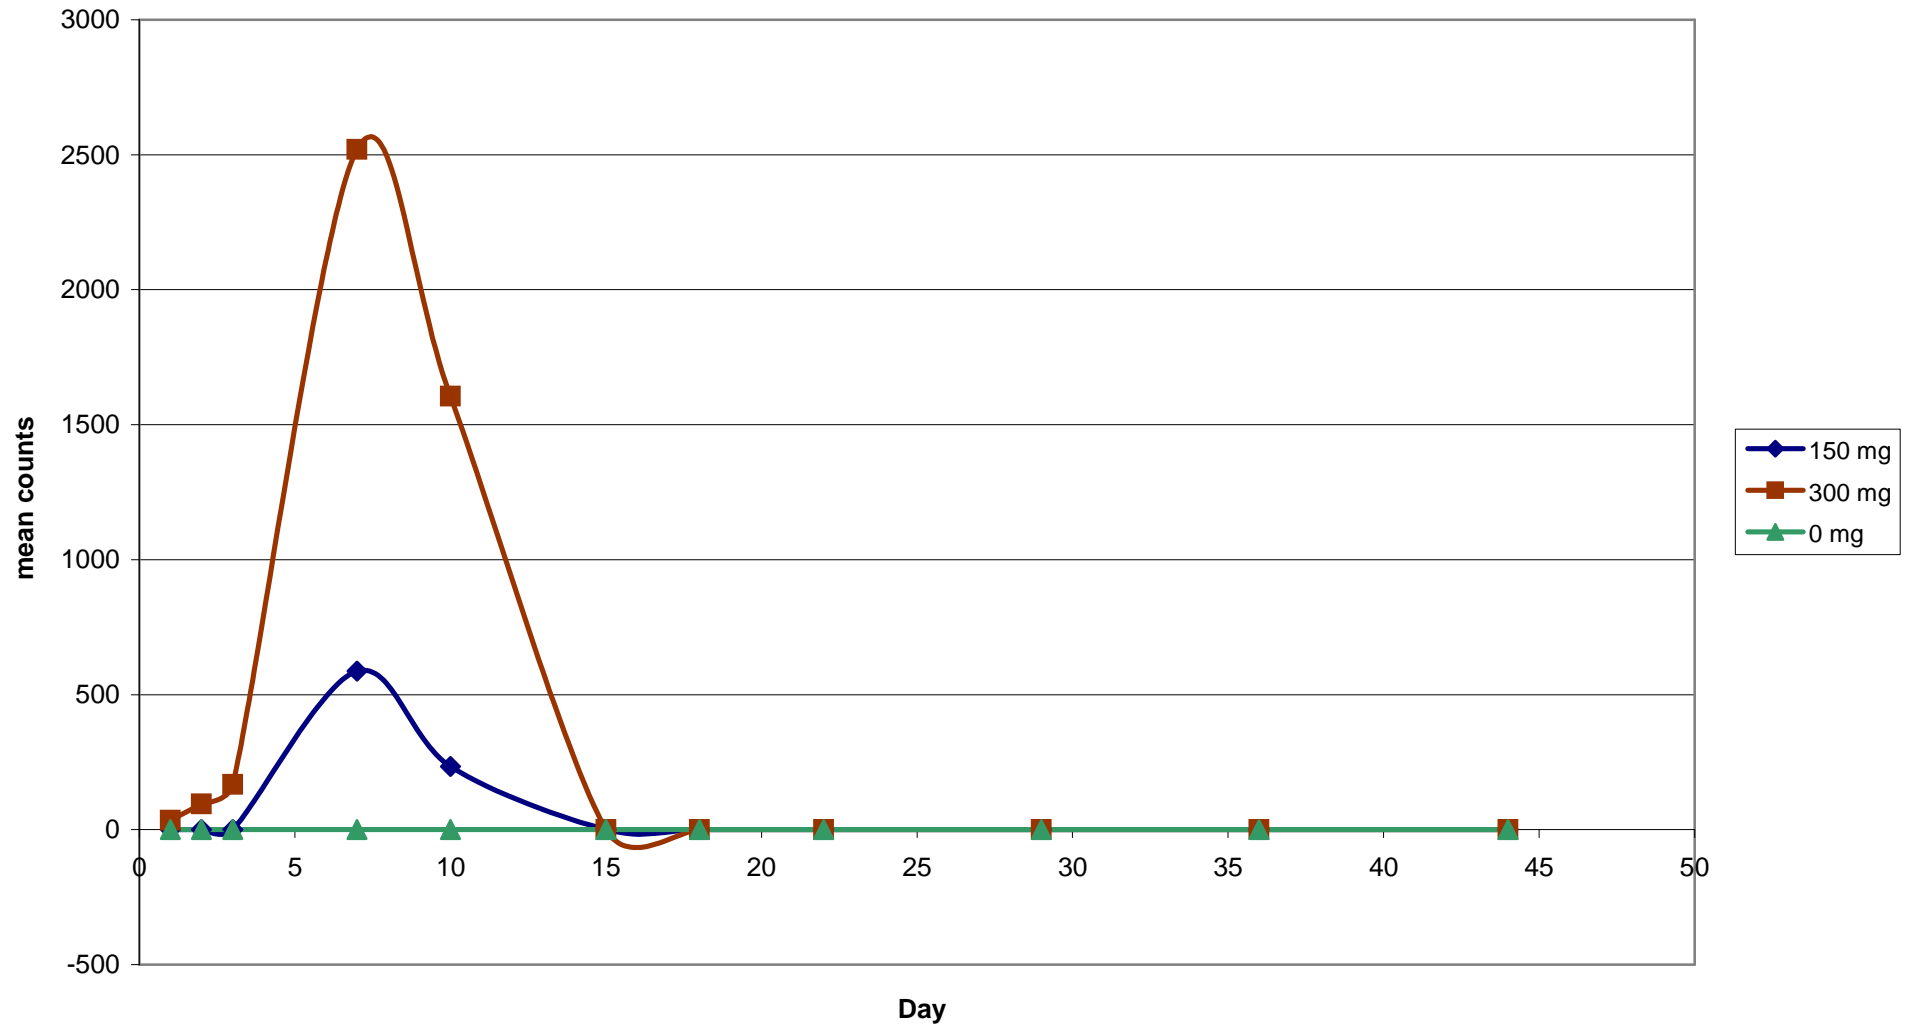

ID 36255

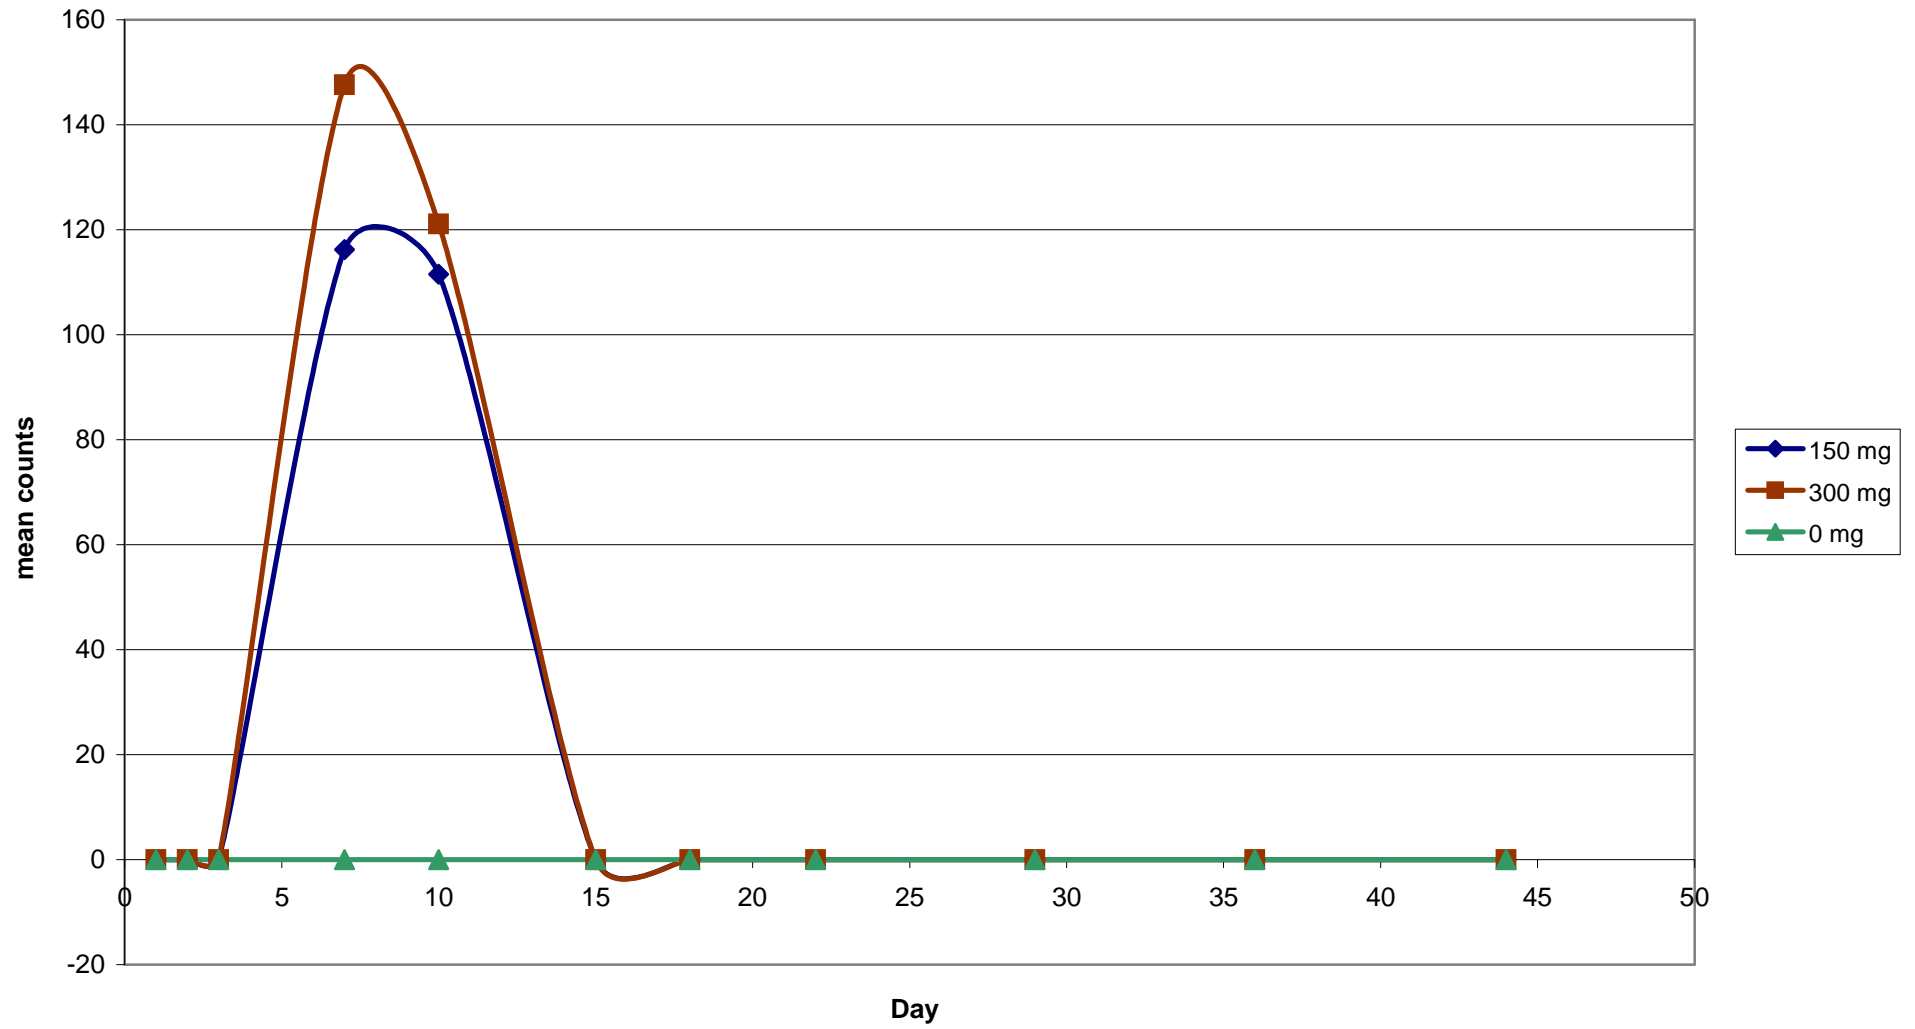

ID 36026

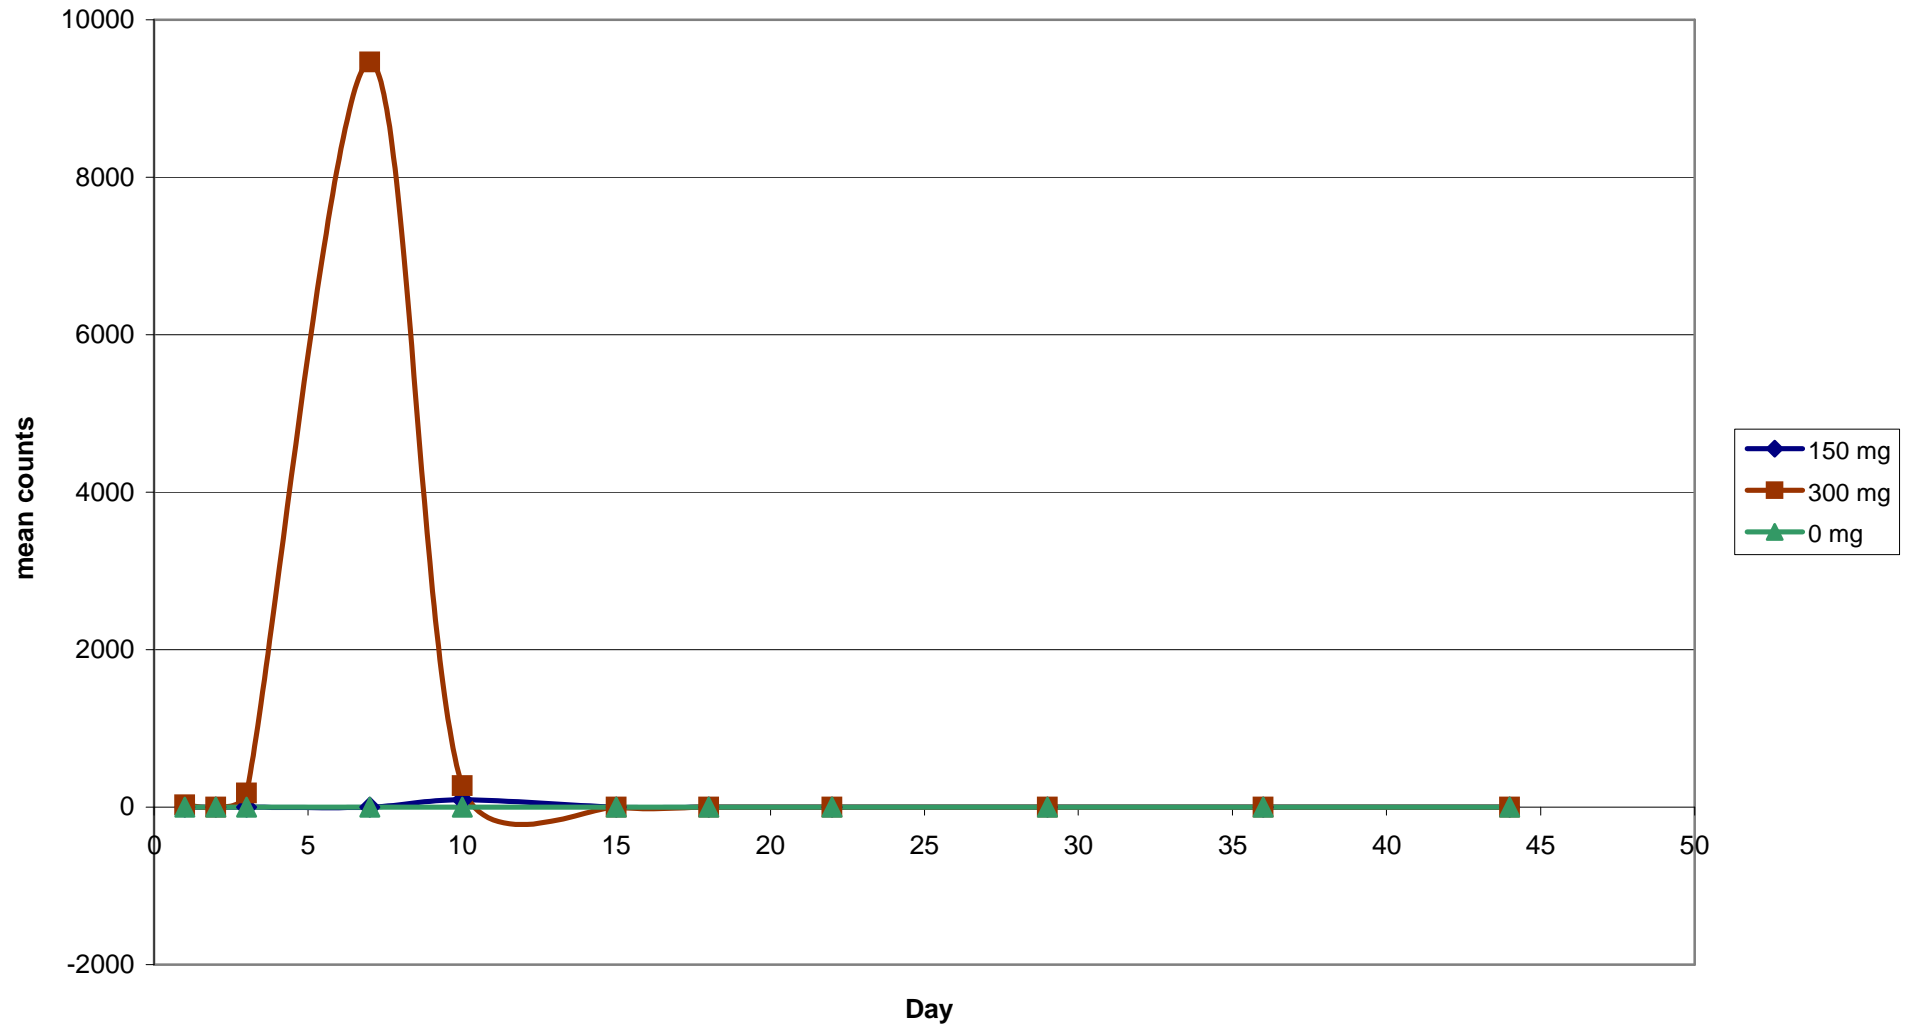

ID 35575

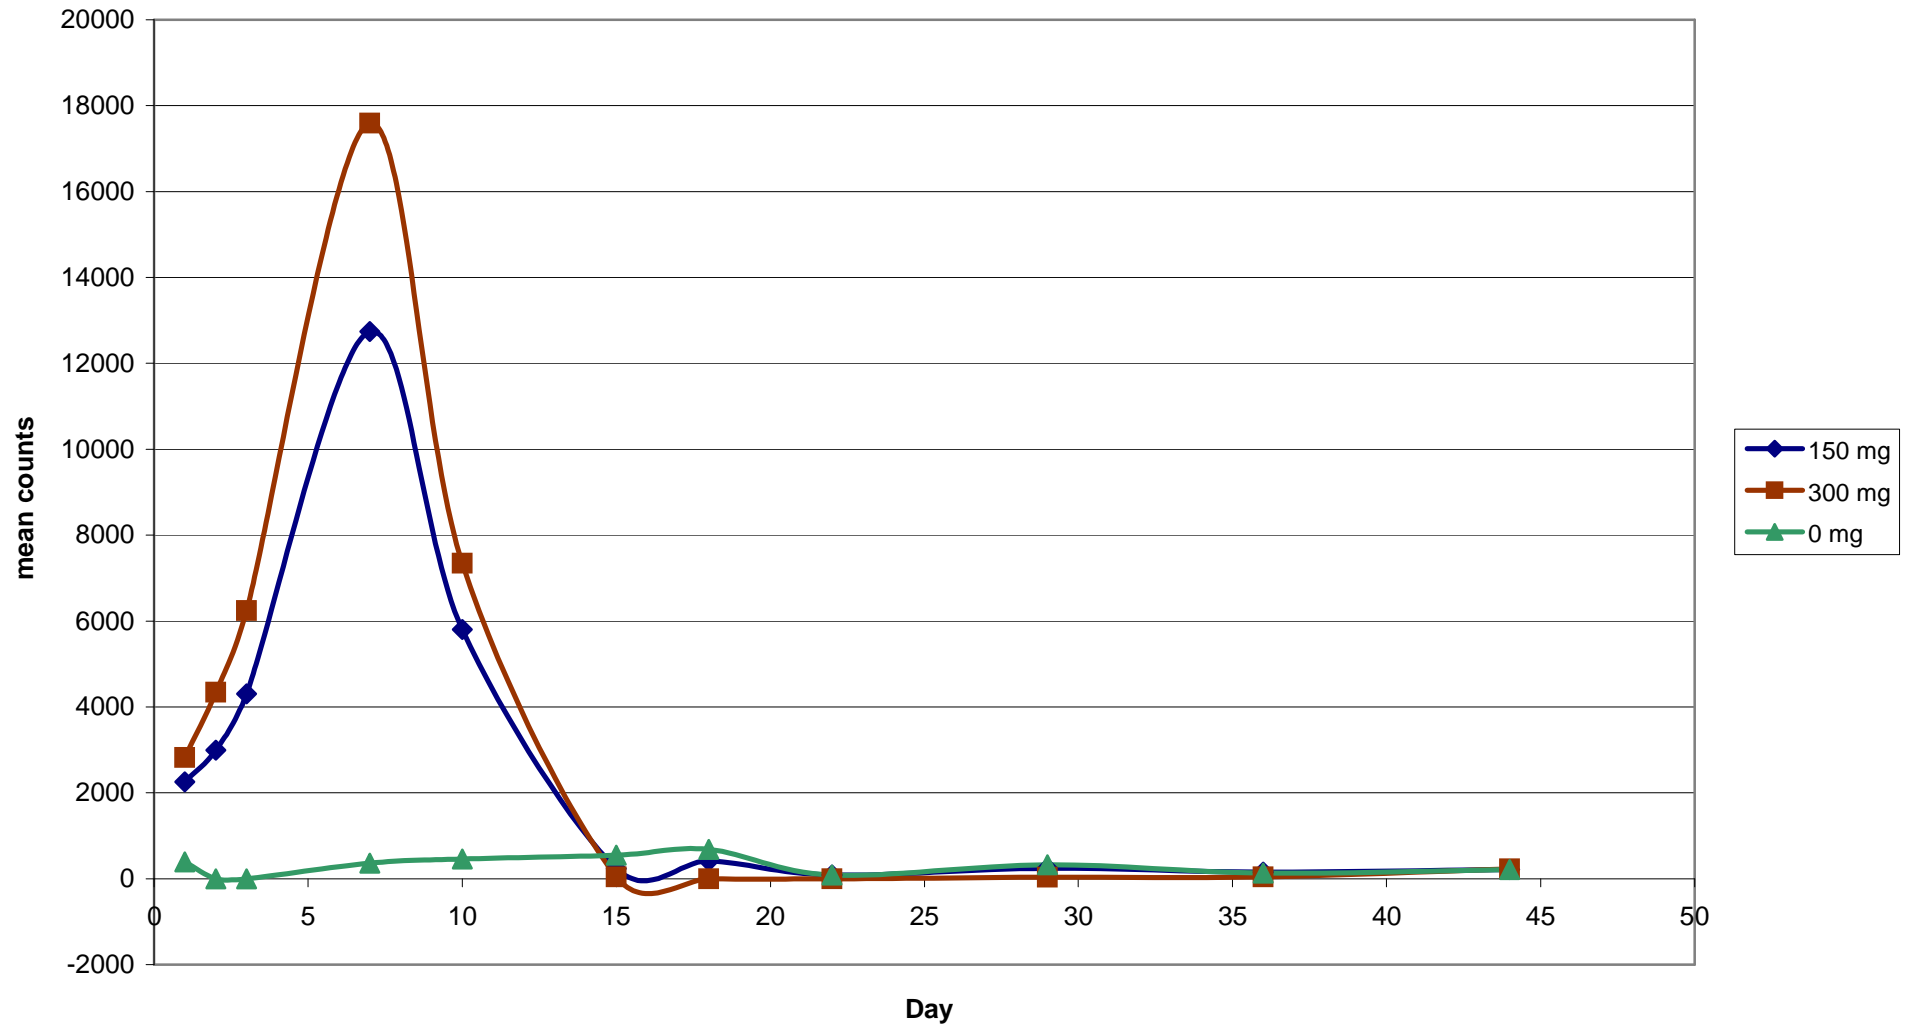

ID 35484

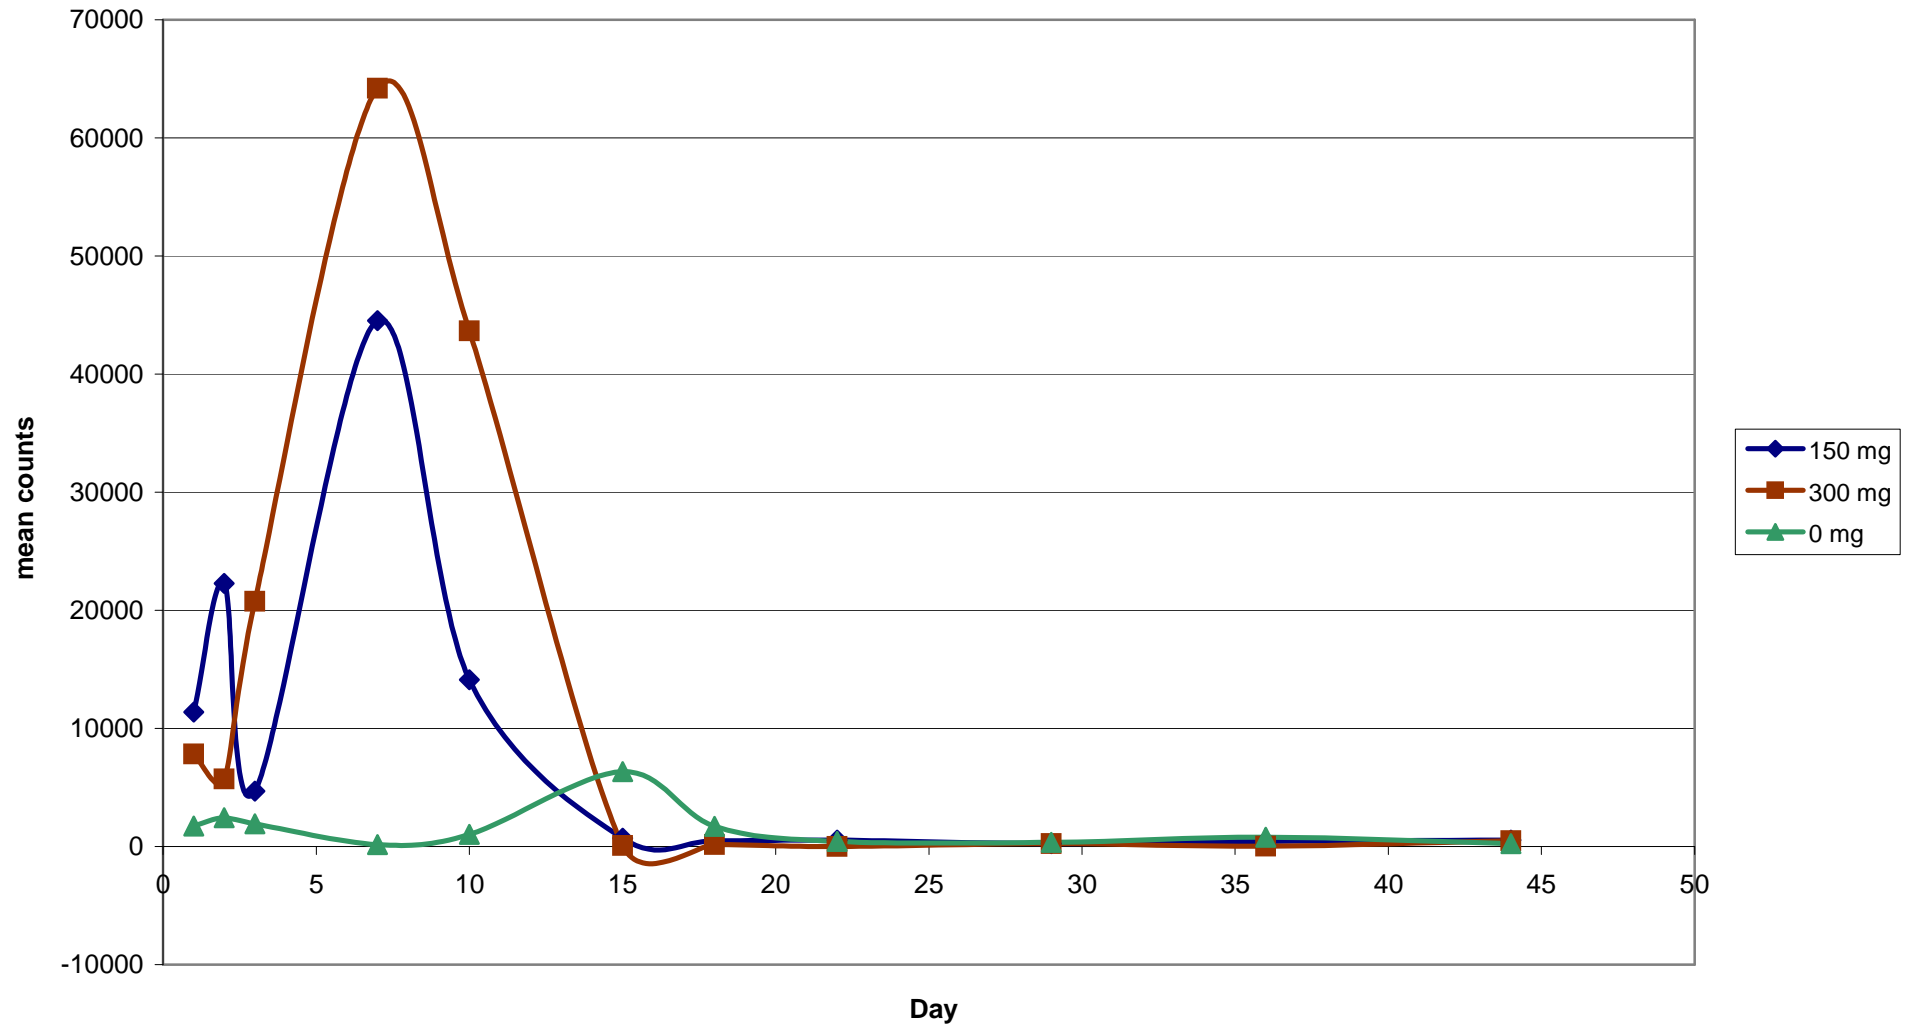

ID 34960

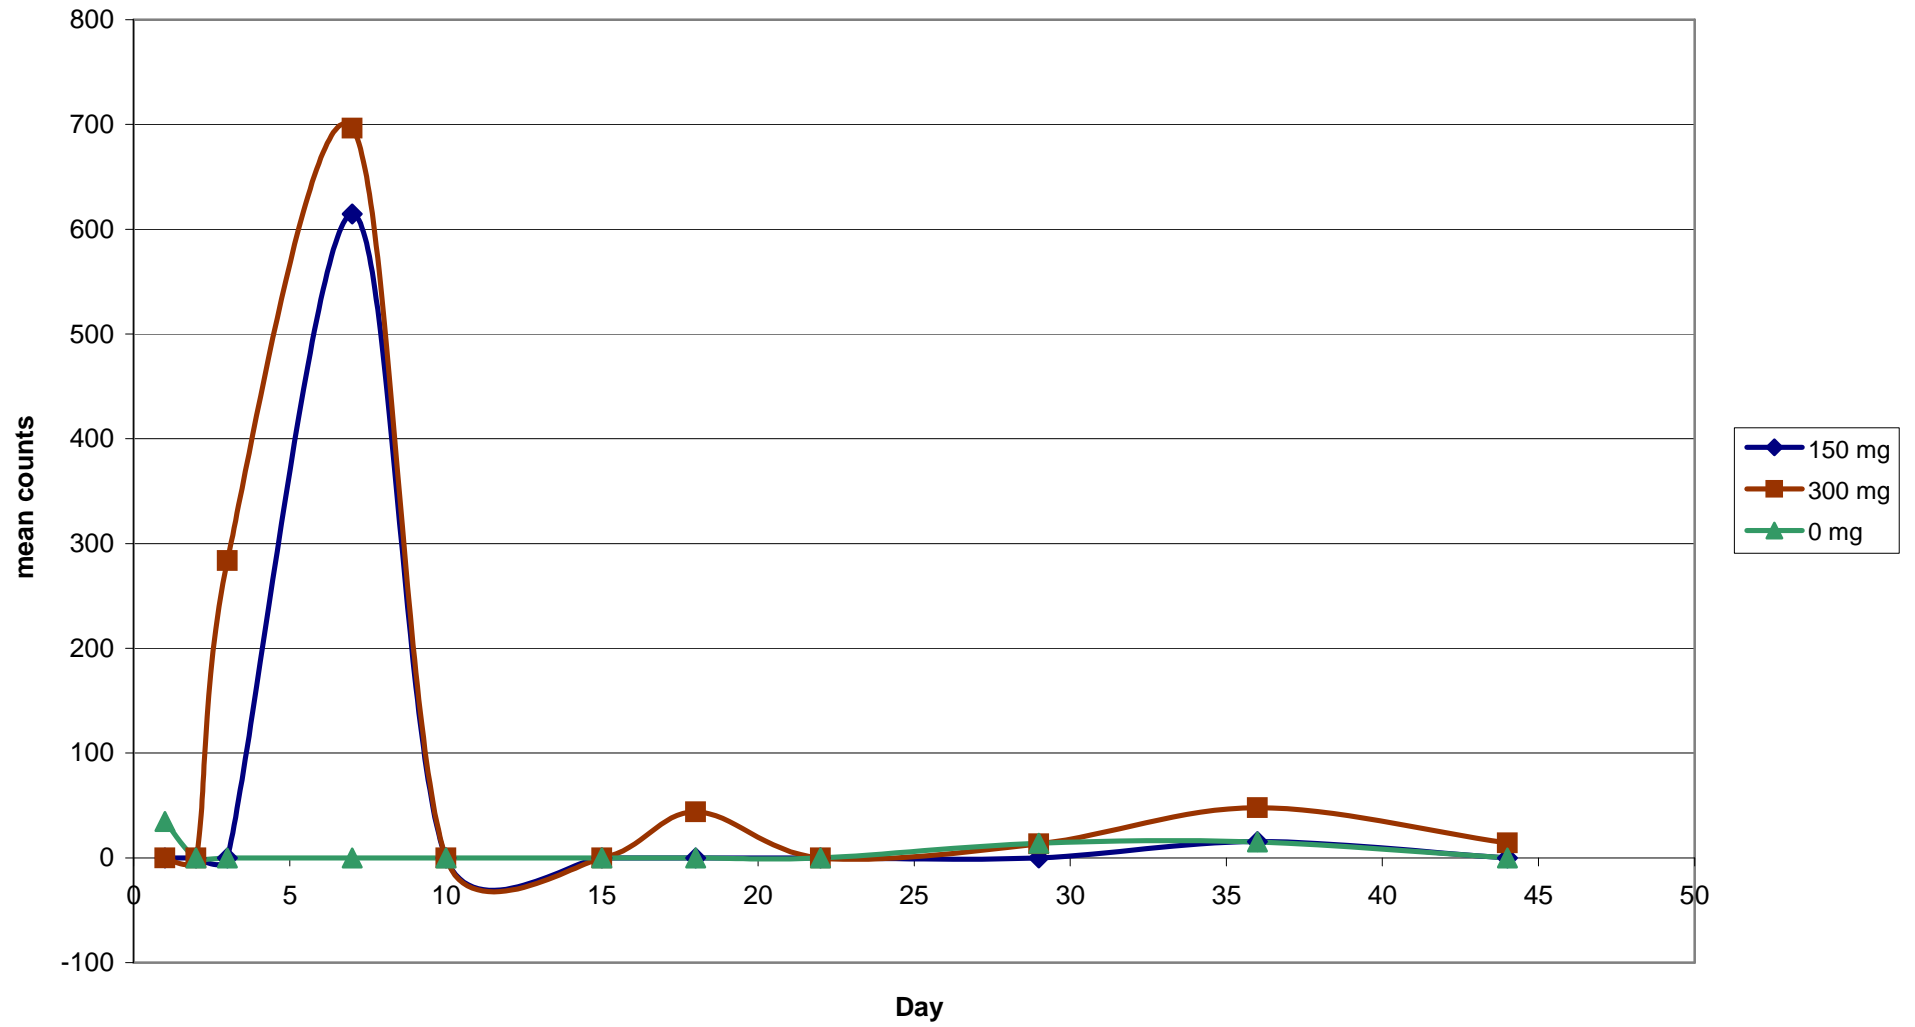

ID 34875

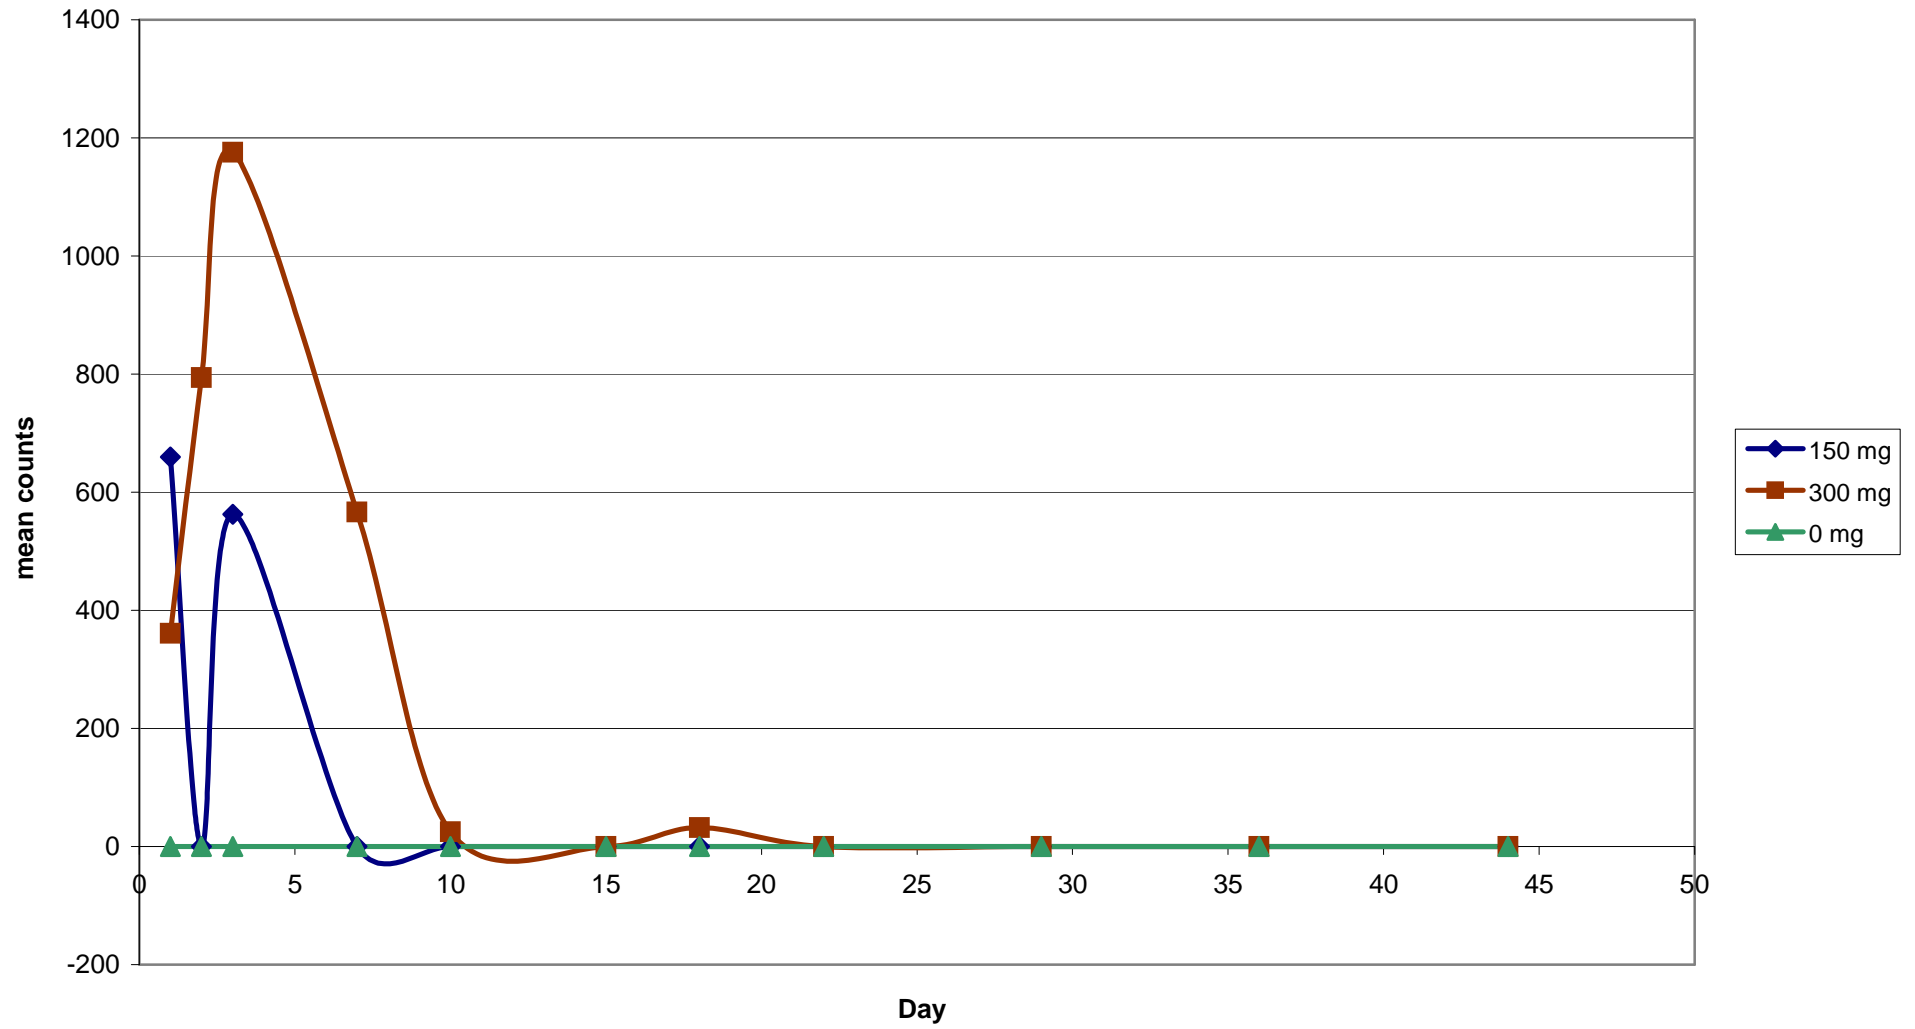

ID 34236

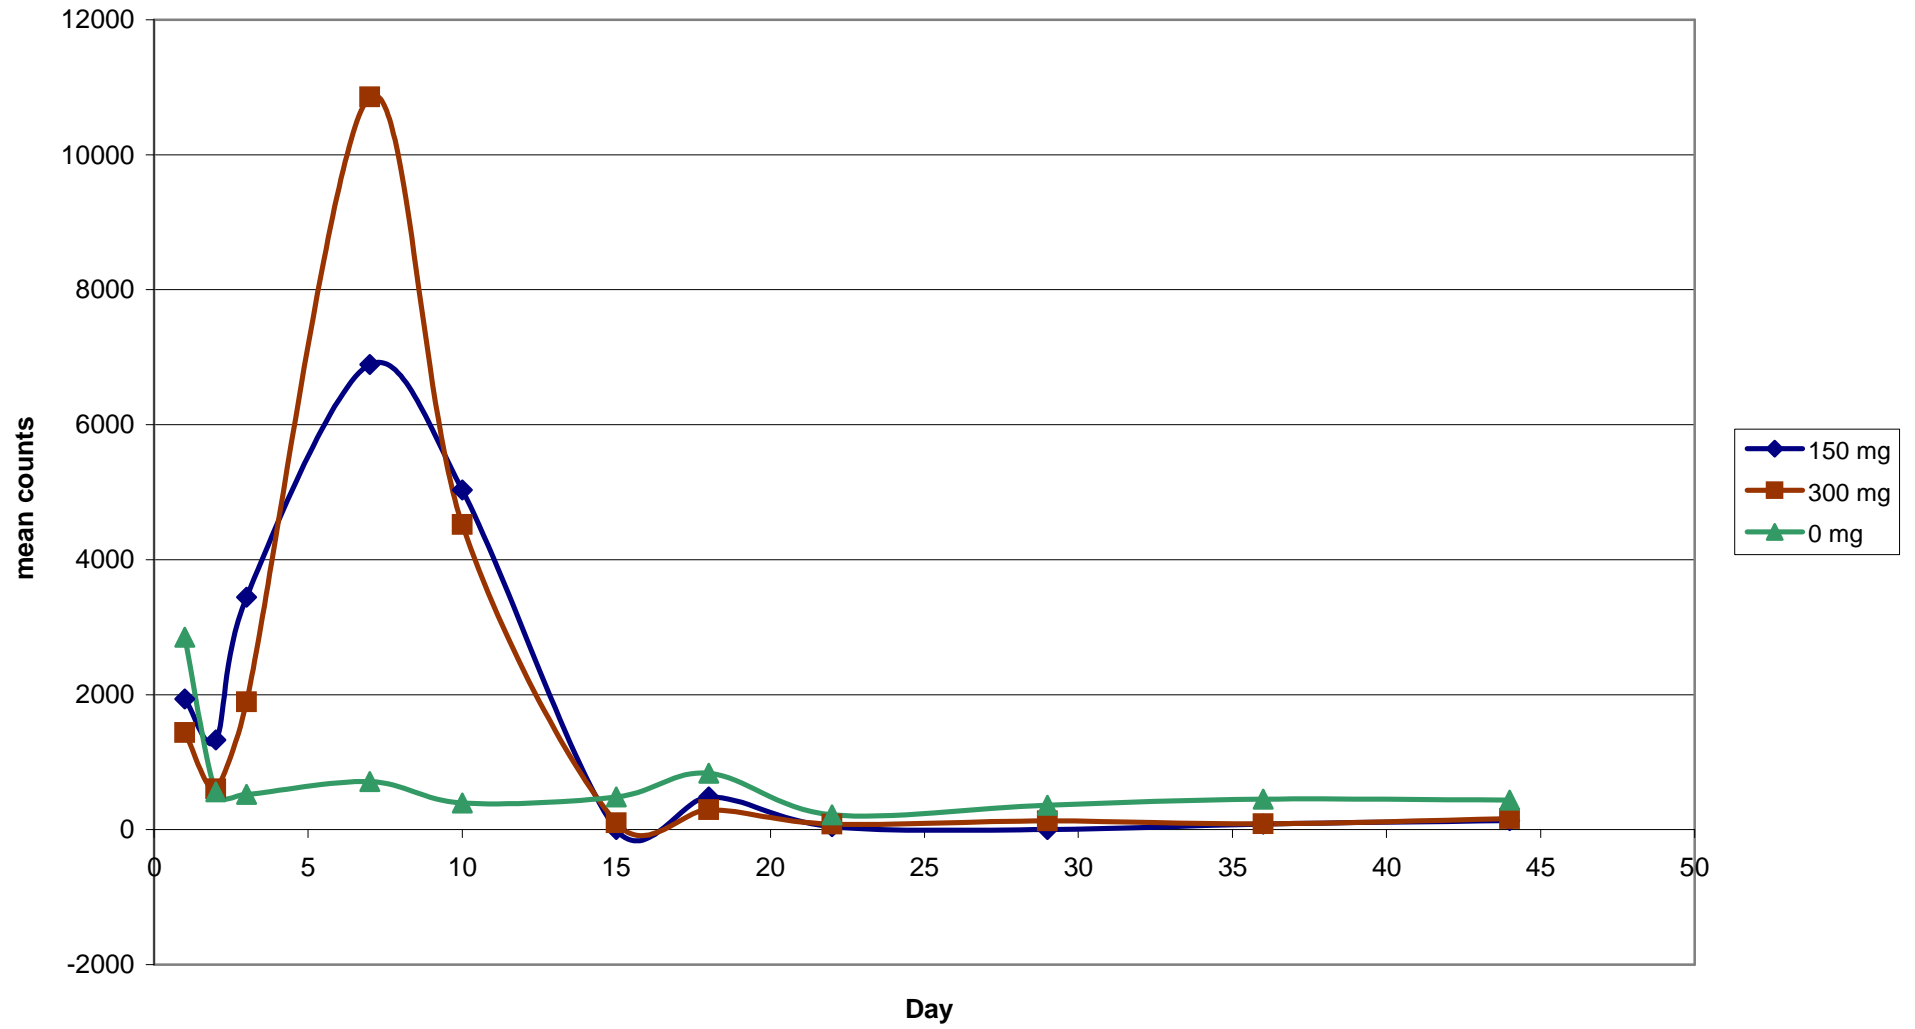



ID 32956

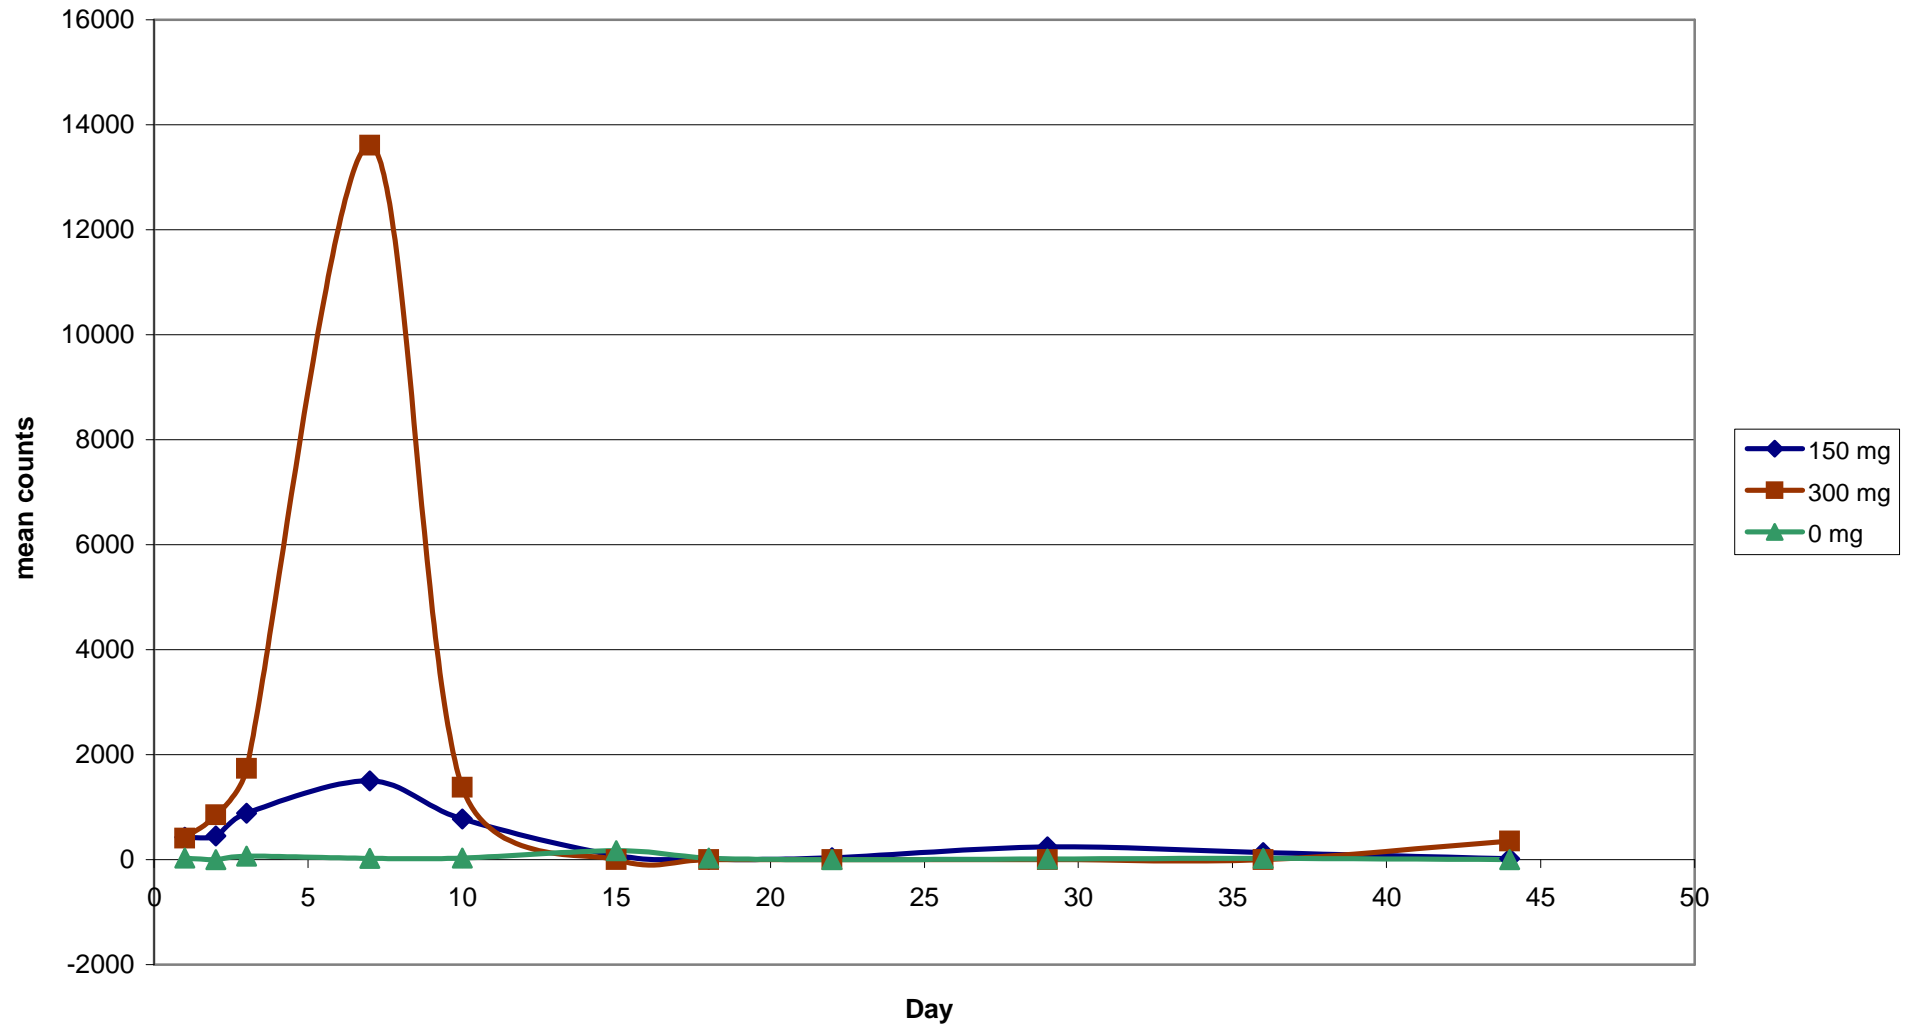

ID 31609

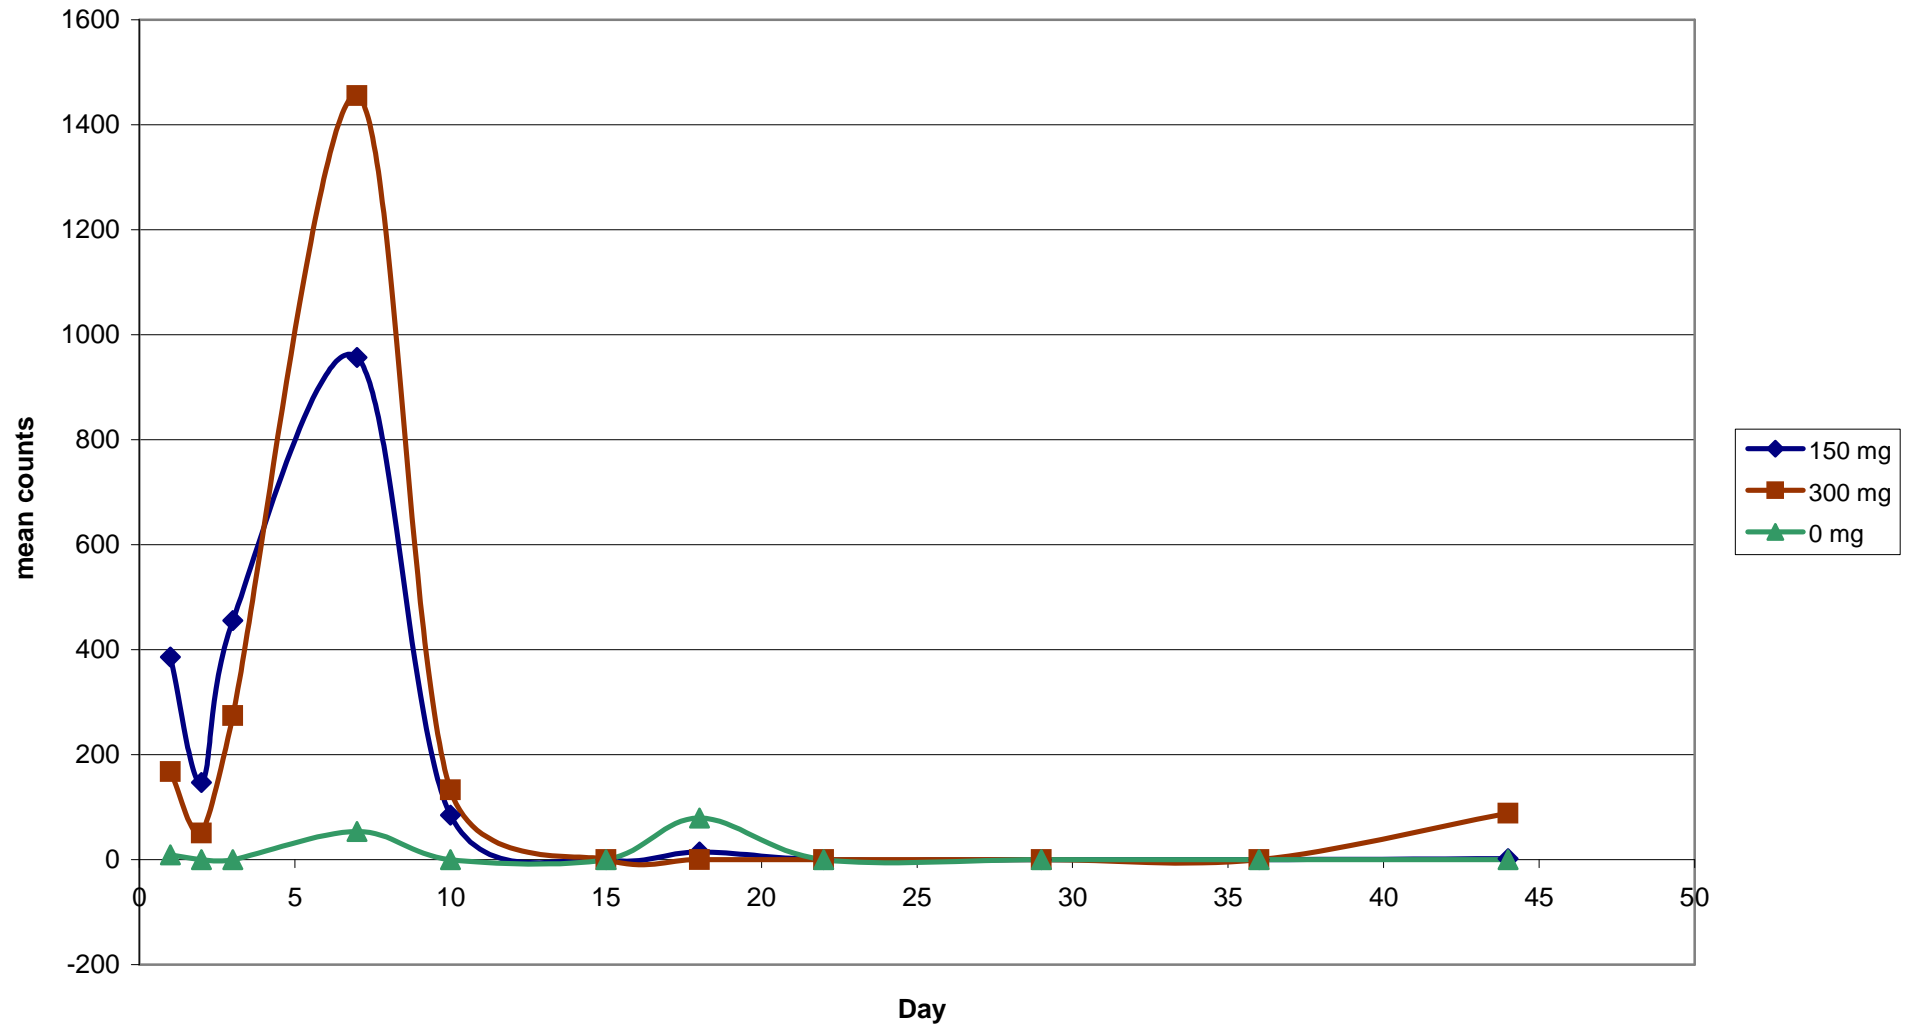

ID 25599

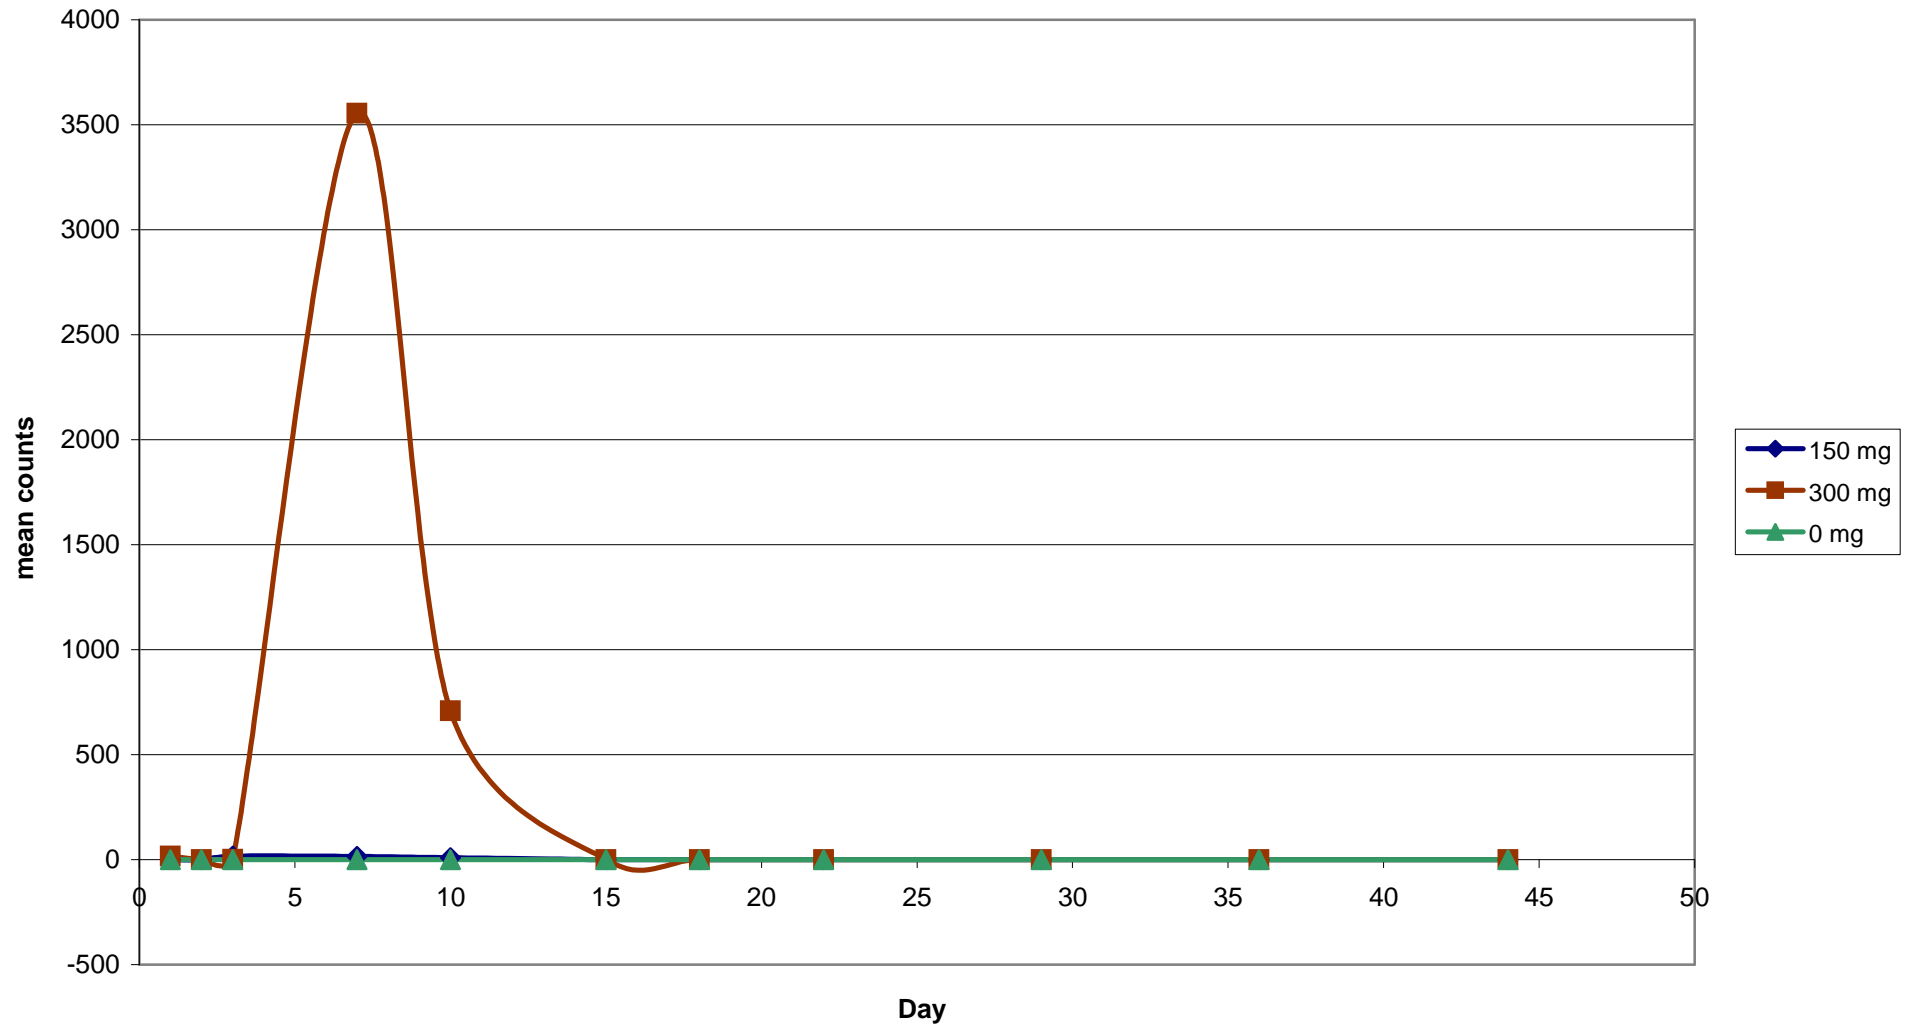

ID 23862

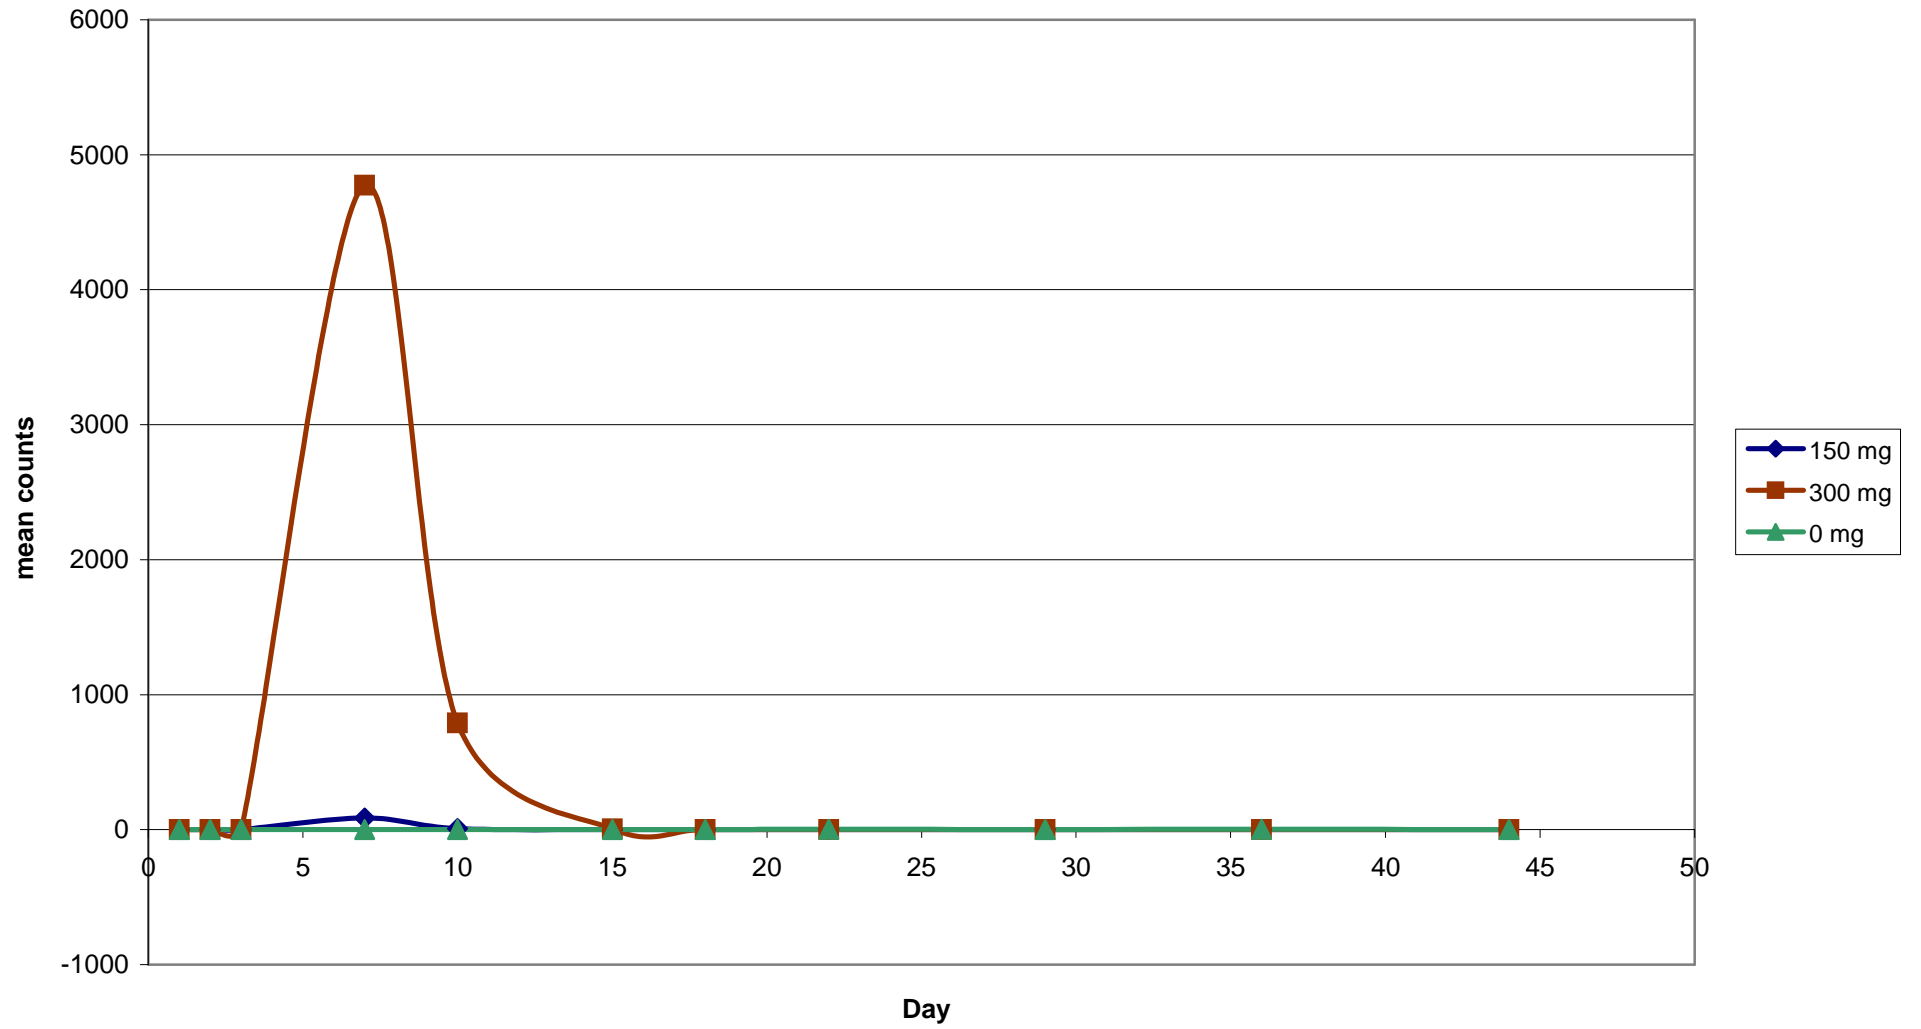

ID 20666

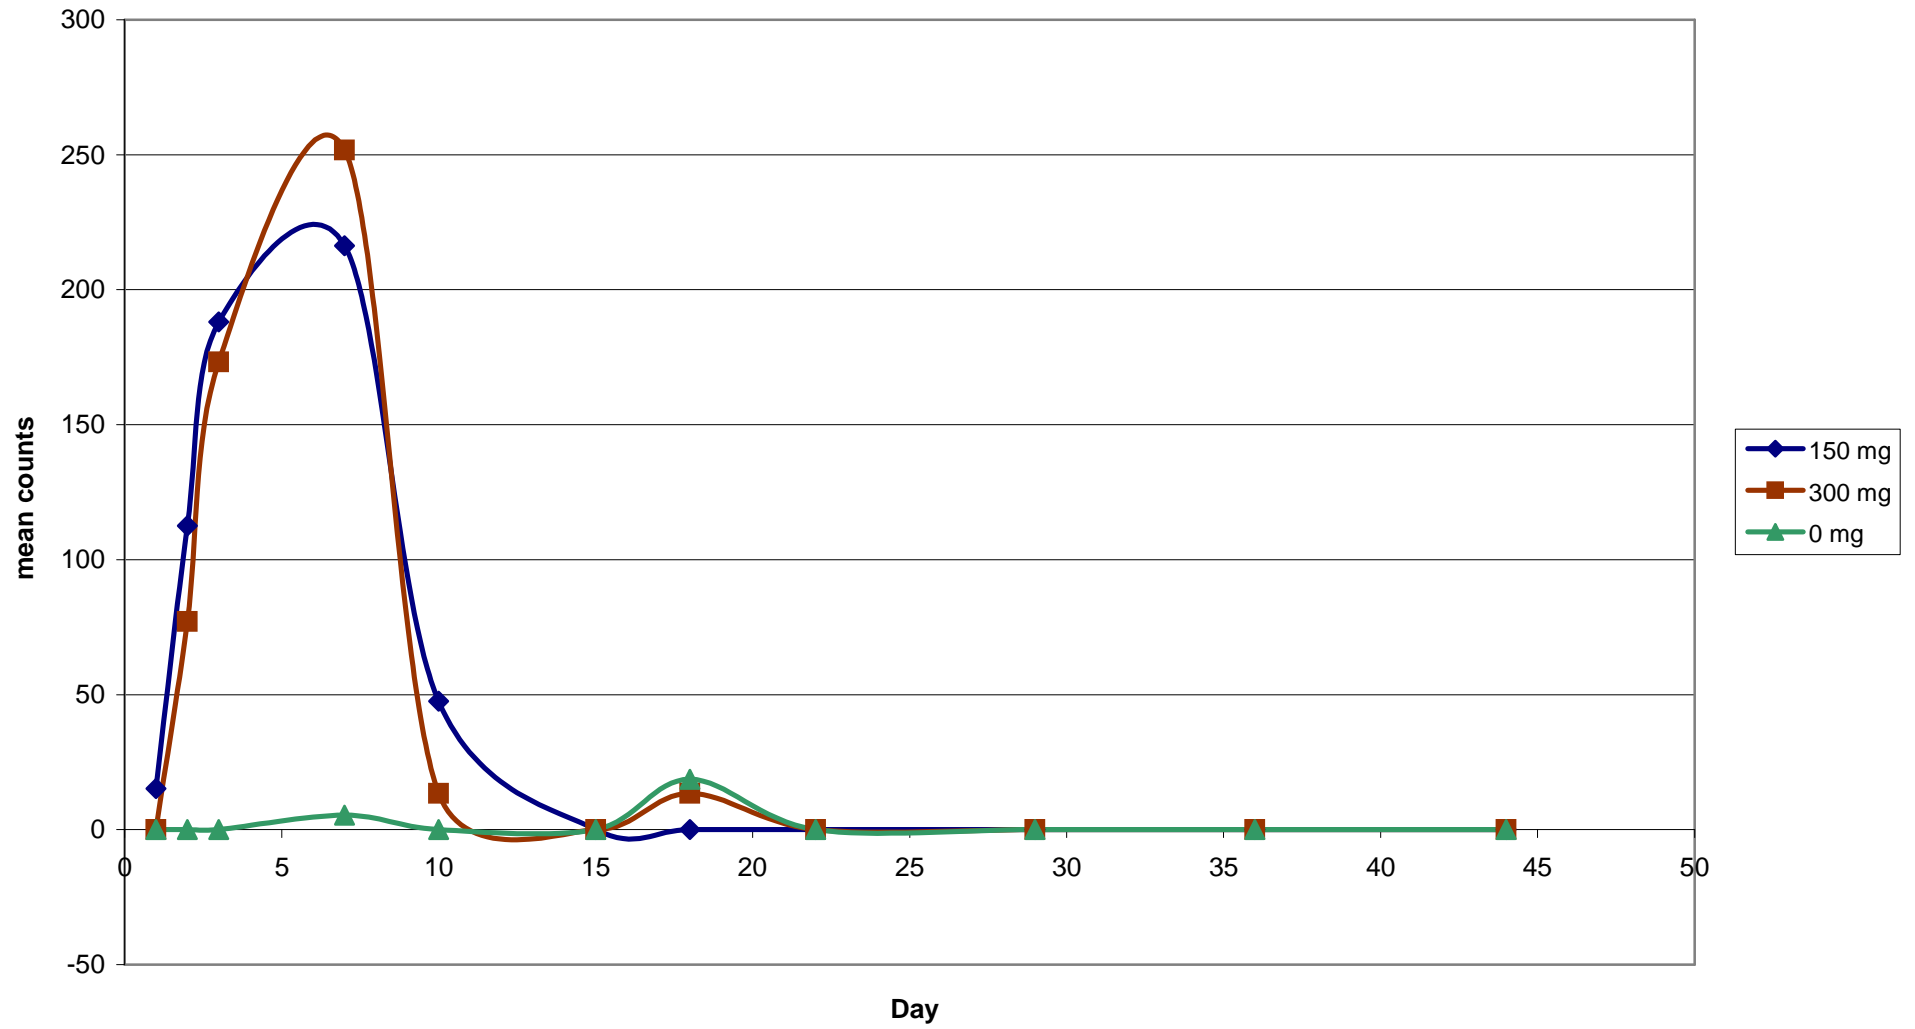

ID 19972

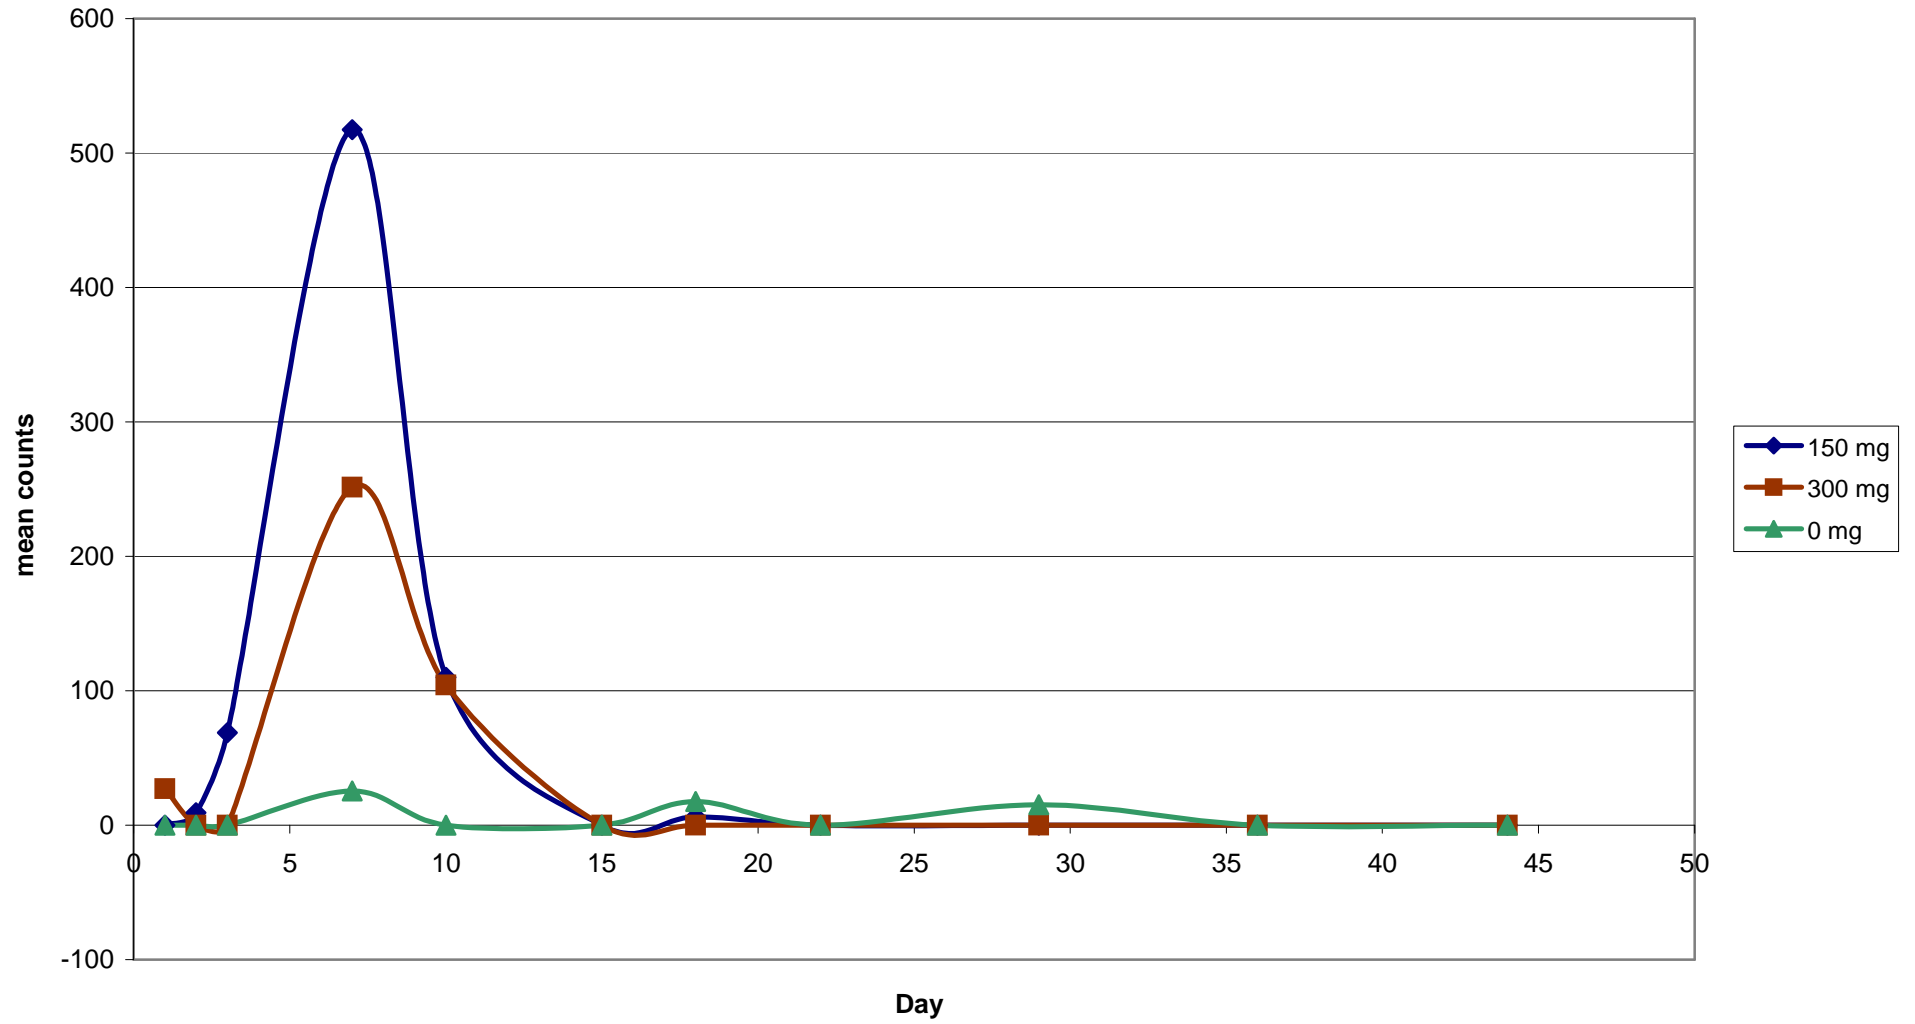

ID 19764

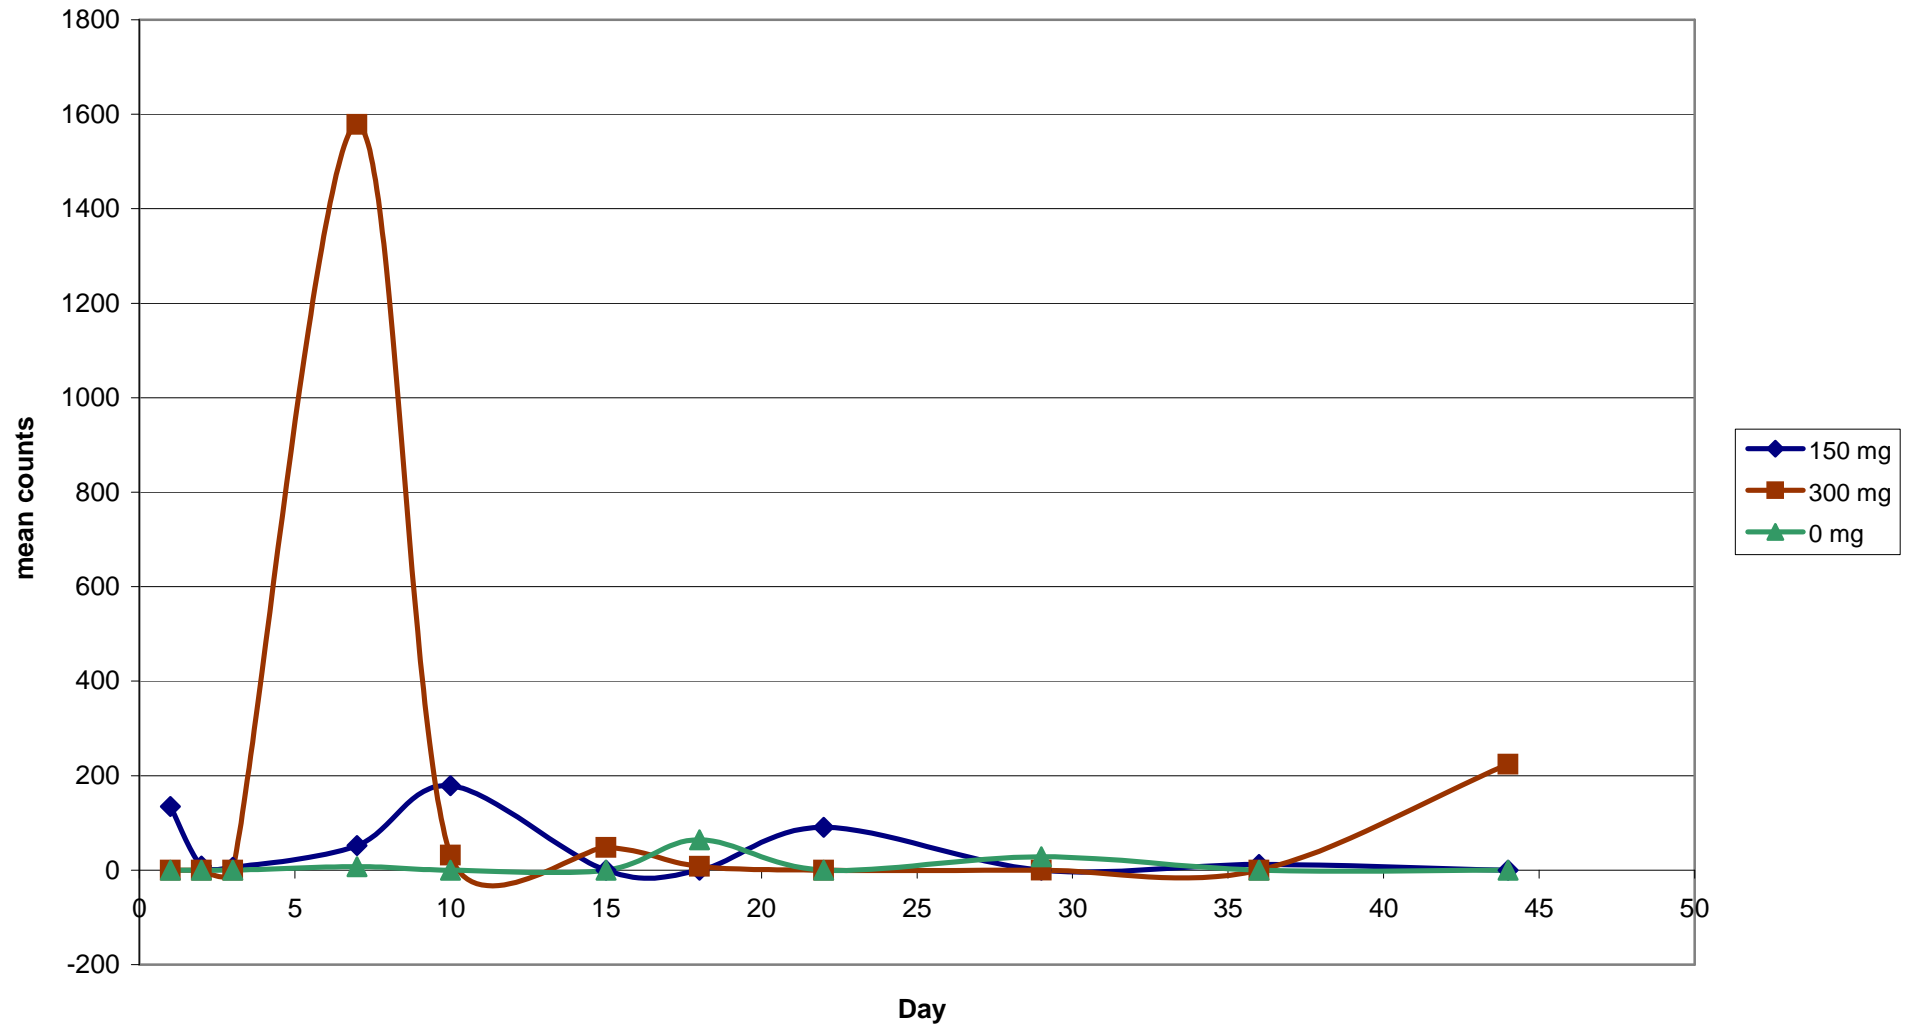

ID 19628

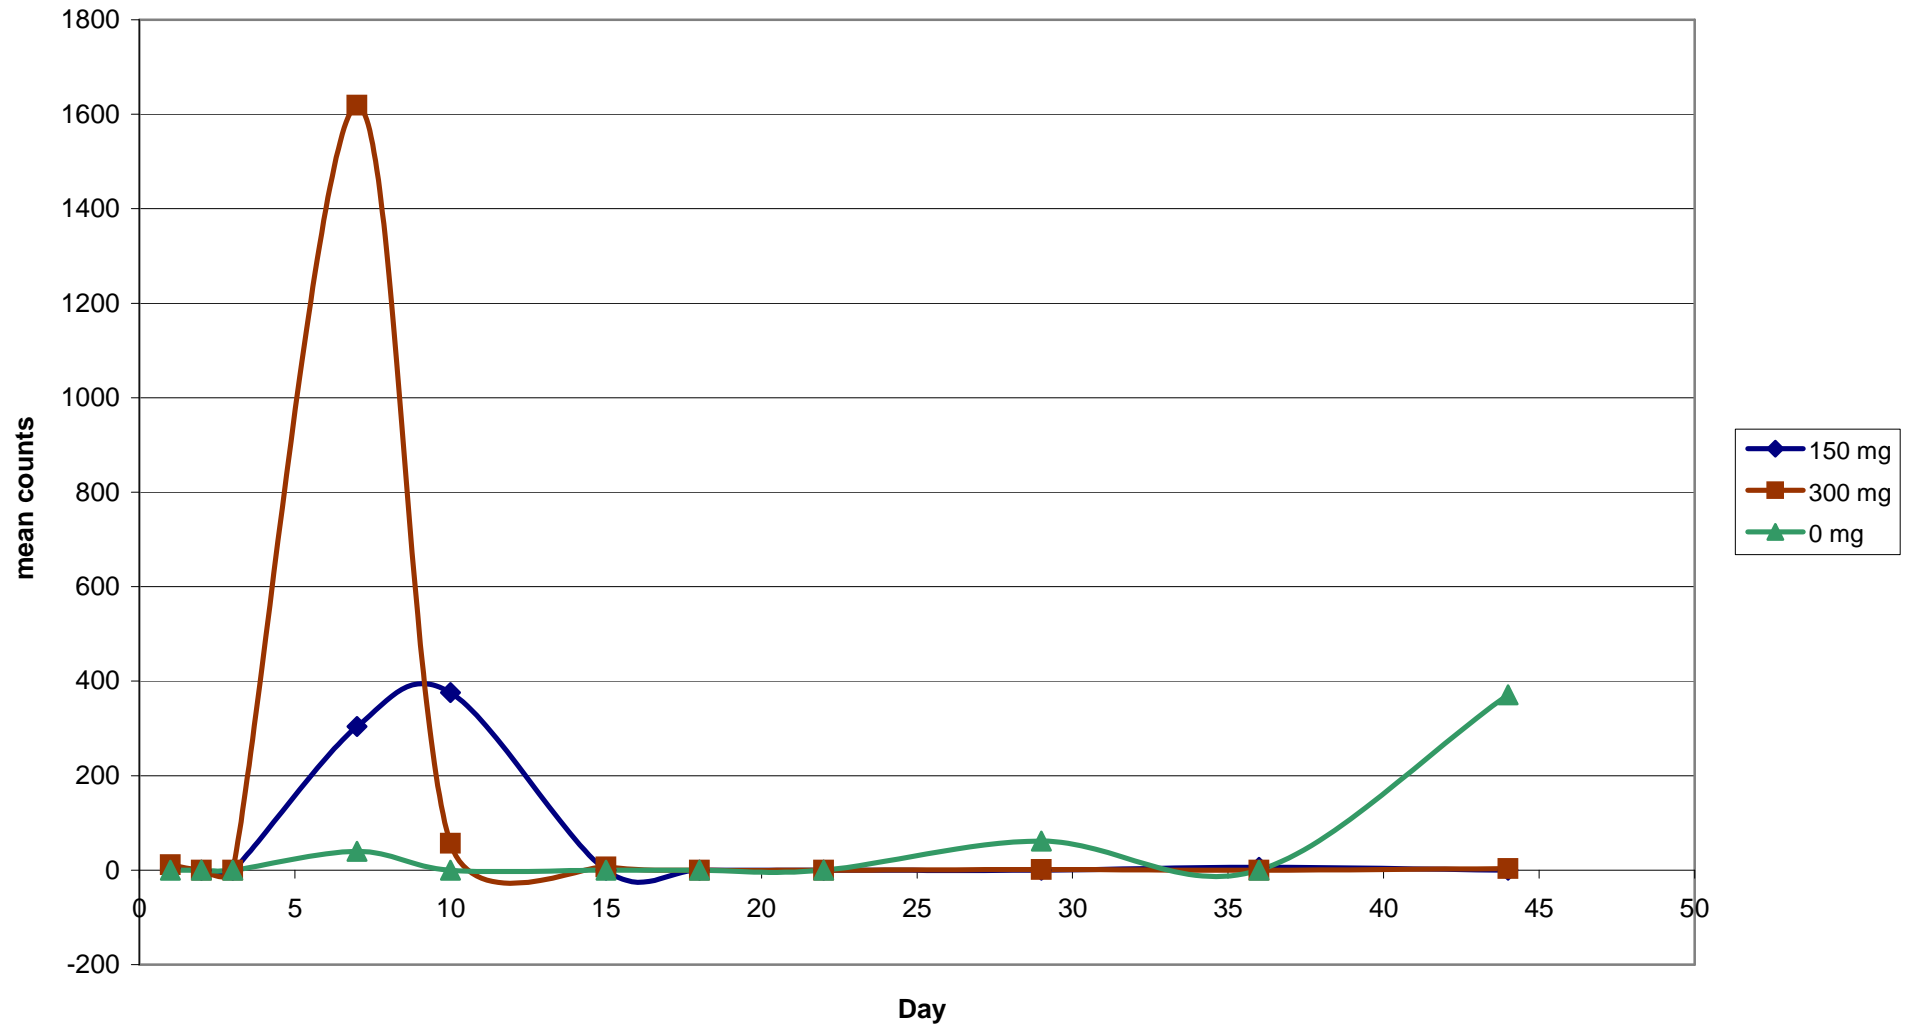



ID 19457

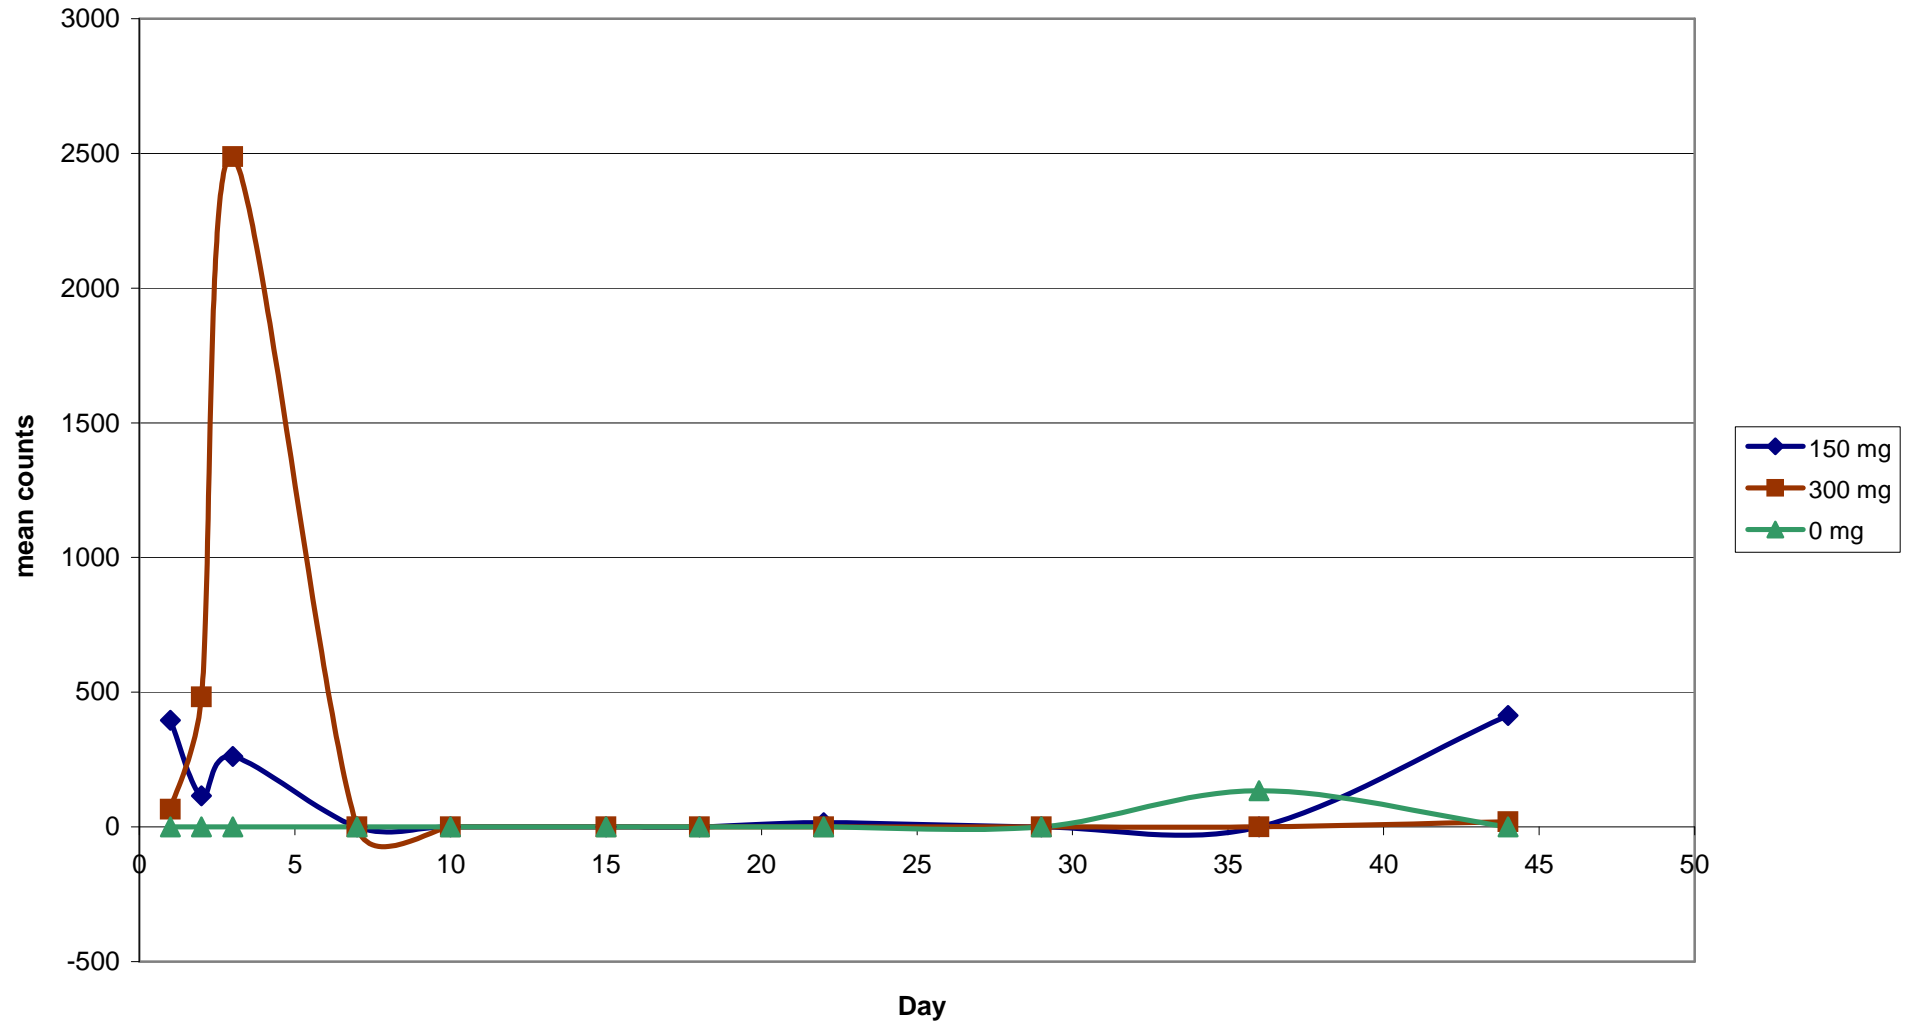

ID 19393

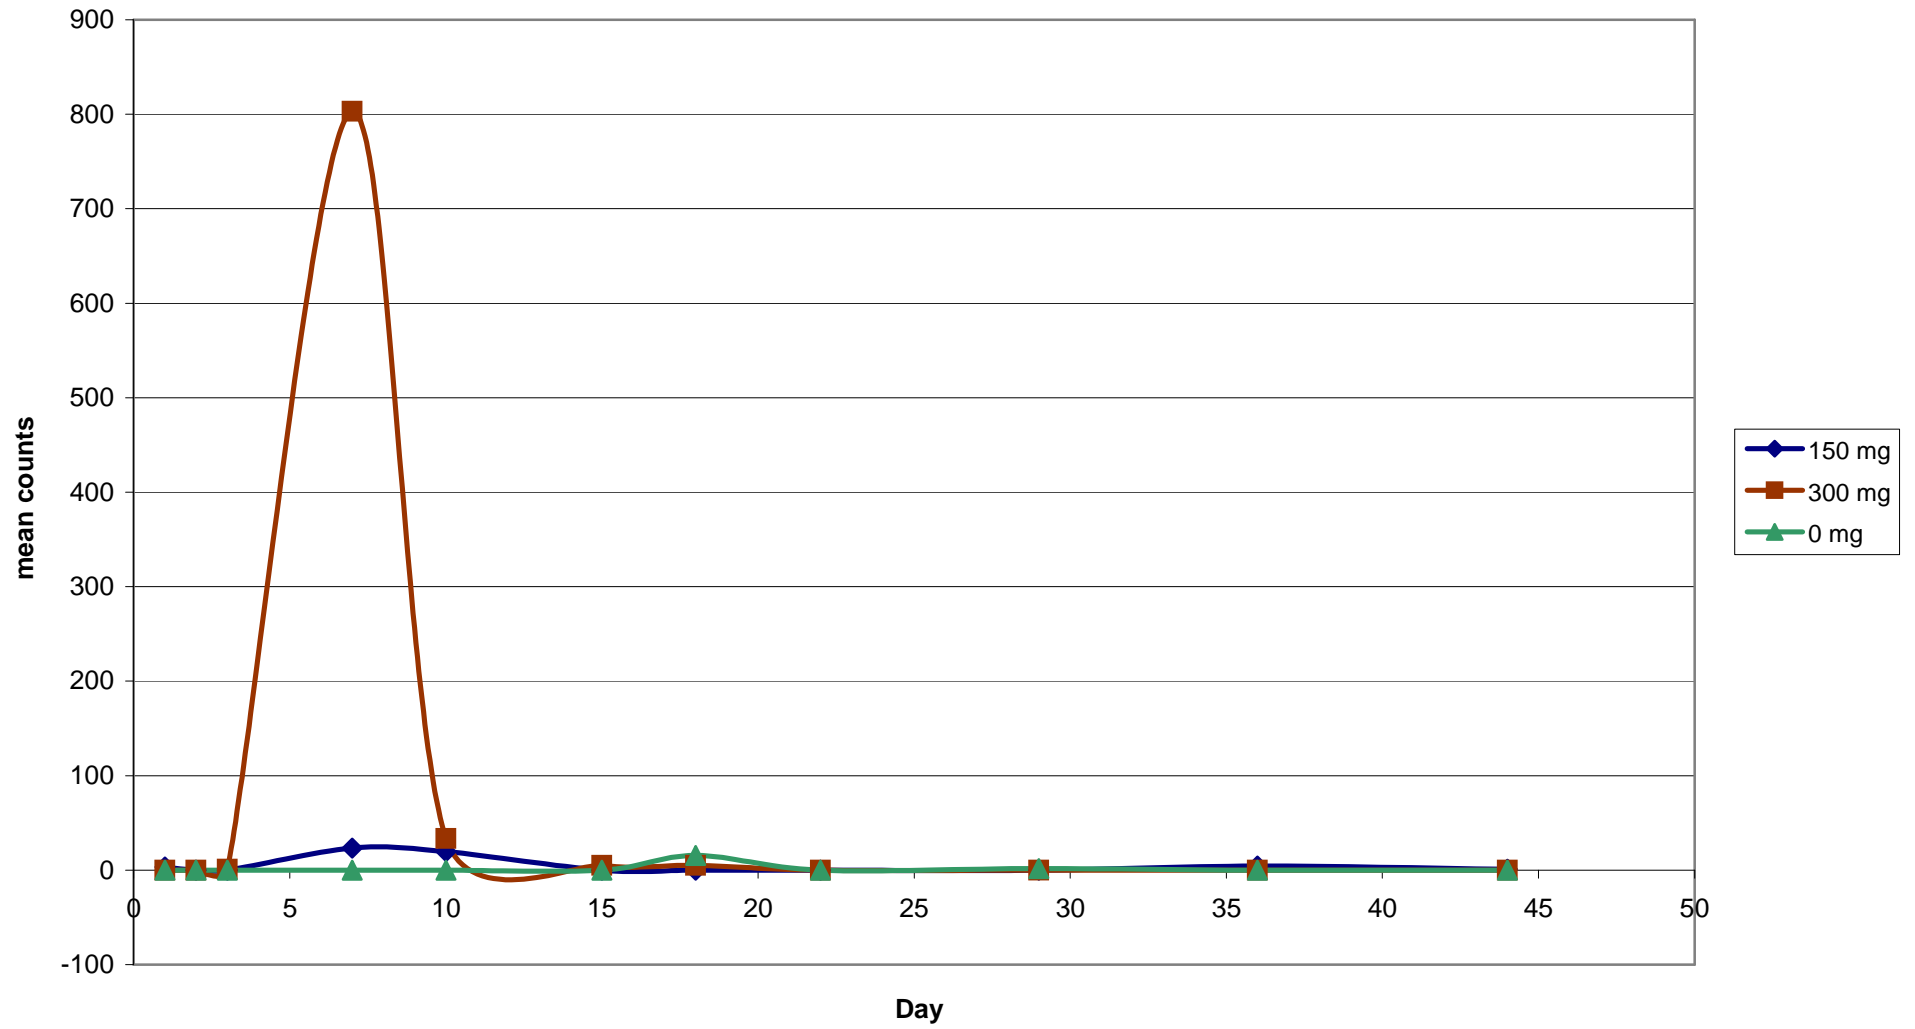

ID 19131

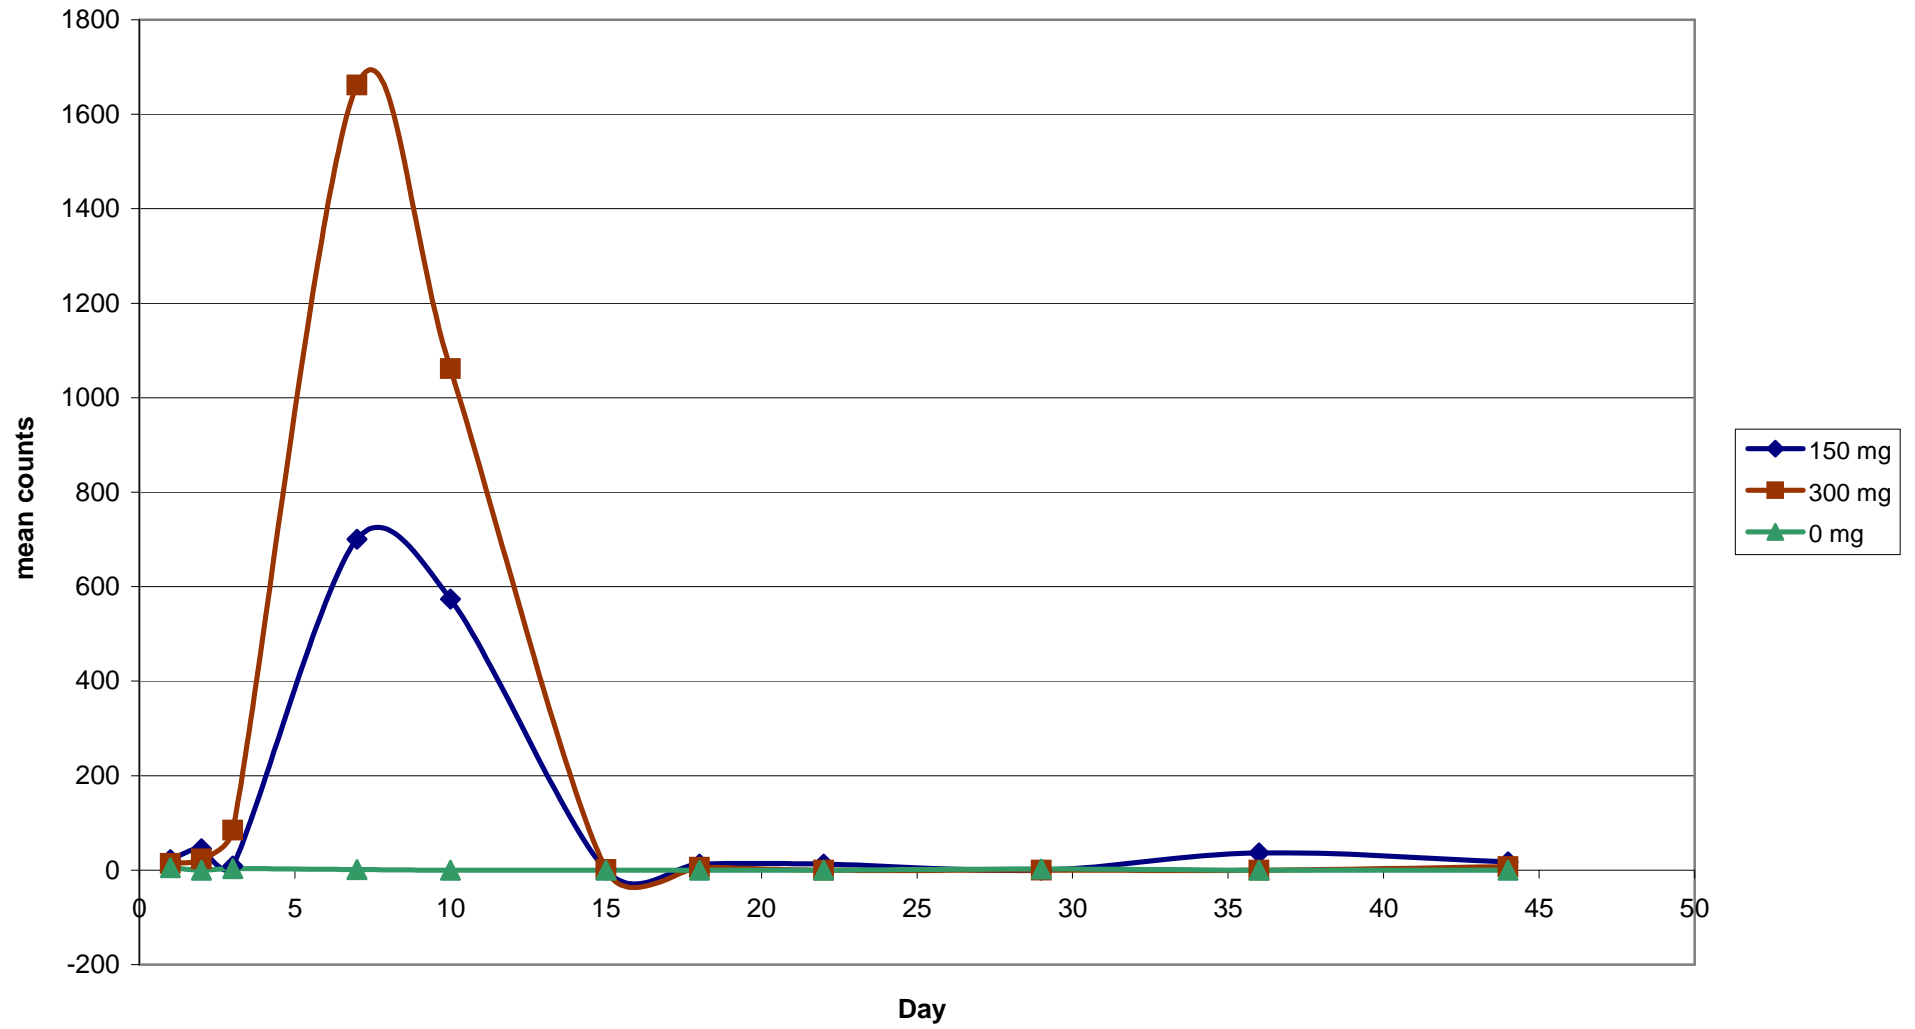

Supplement: pone.0034606.s002.pdf [file pone.0034606.s002.pdf]
