# Supplementary material for: Proteomic Candidate Biomarkers of Drug-Induced Nephrotoxicity in the Rat
Source: PubMed Central journal article supplement (PMC3324487; doi:10.1371/journal.pone.0034606), 2012-04-11
Supplement: pone.0034606.s001.pdf [file pone.0034606.s001.pdf]

0 mg/kg  
gentamicin  
day 1

Mass [kDa]

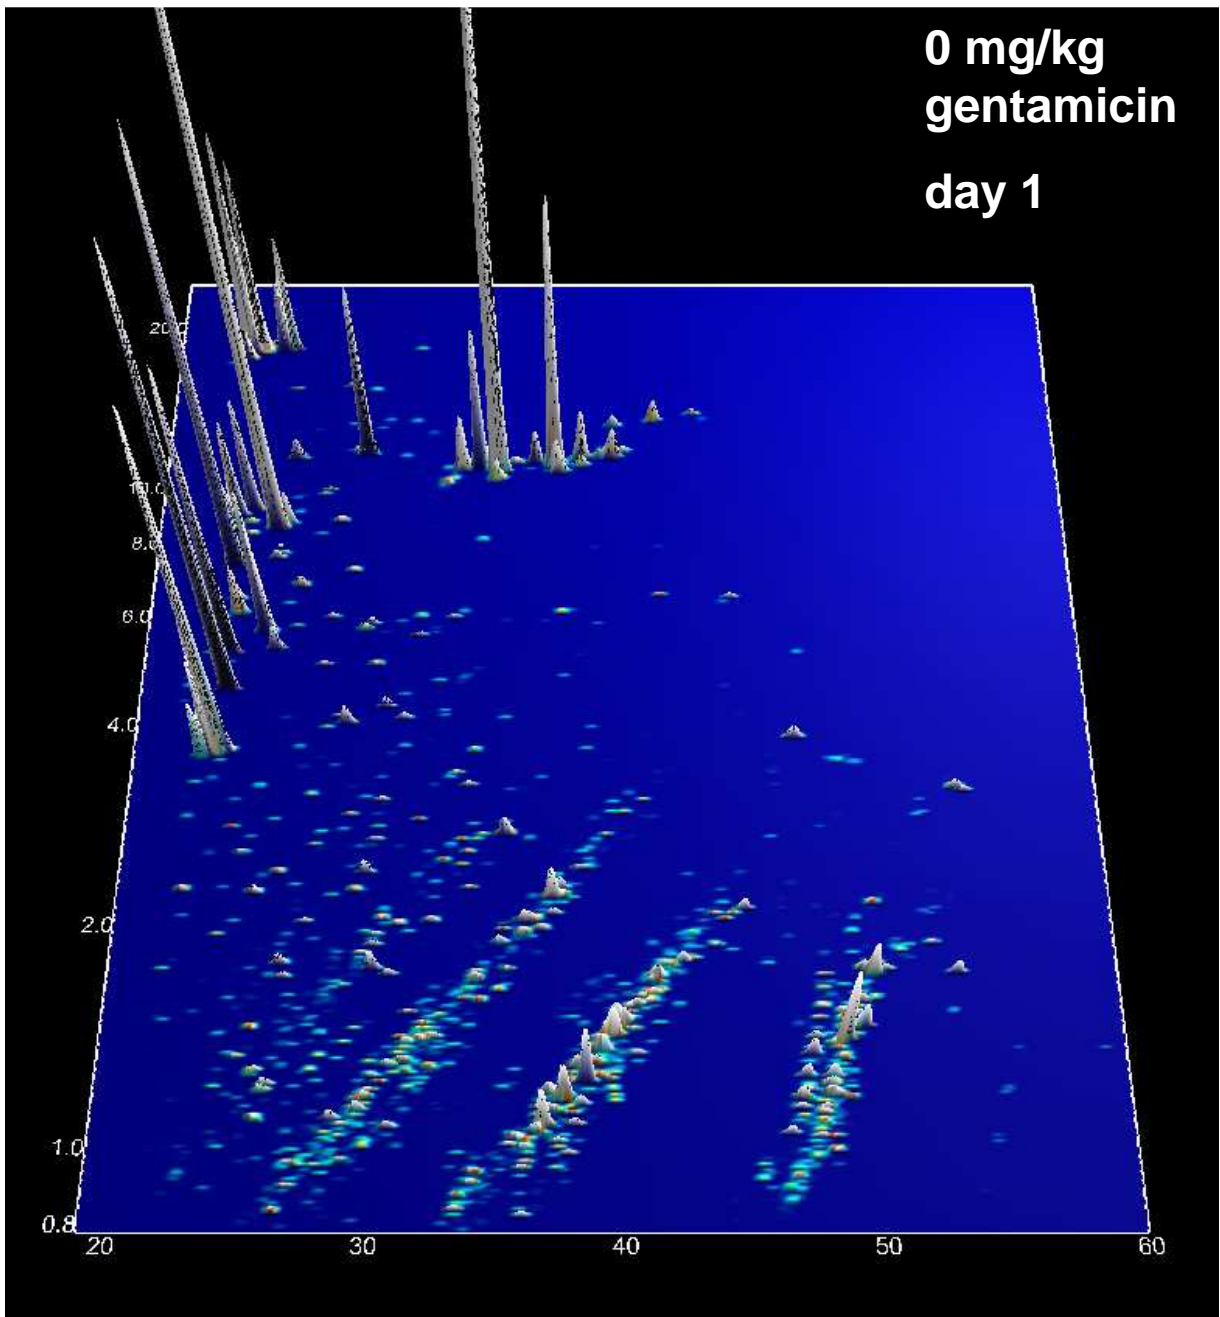

CE-time [min]

0 mg/kg  
gentamicin  
day 2

Mass [kDa]

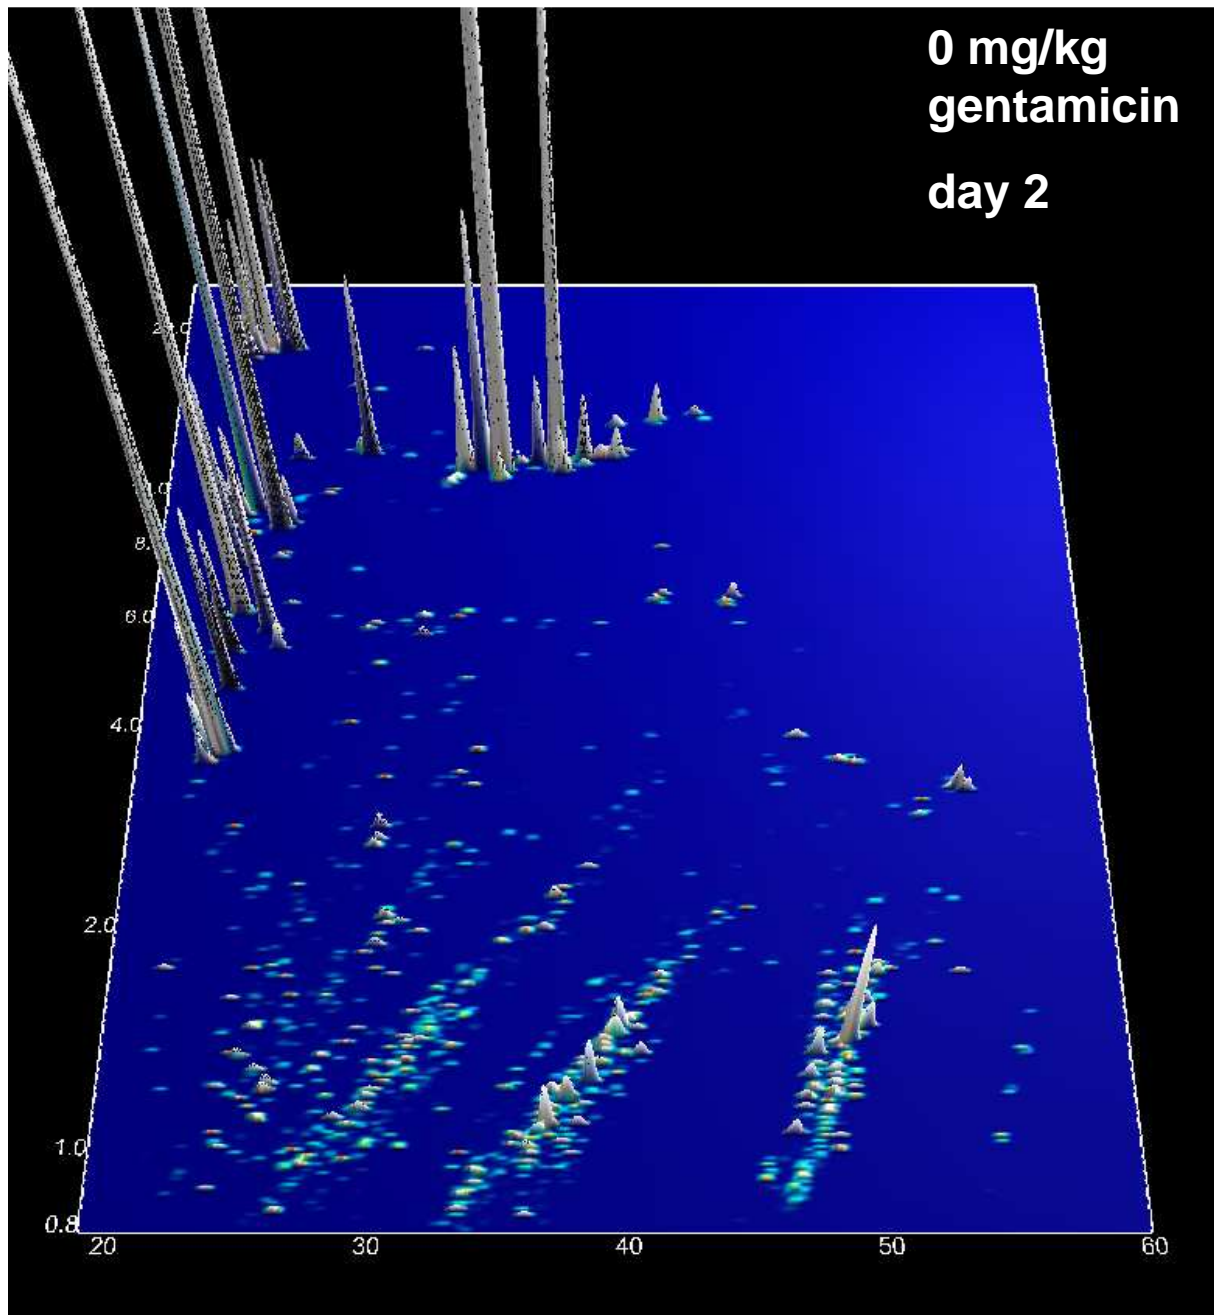

CE-time [min]

0 mg/kg  
gentamicin  
day 3

Mass  
[kDa]

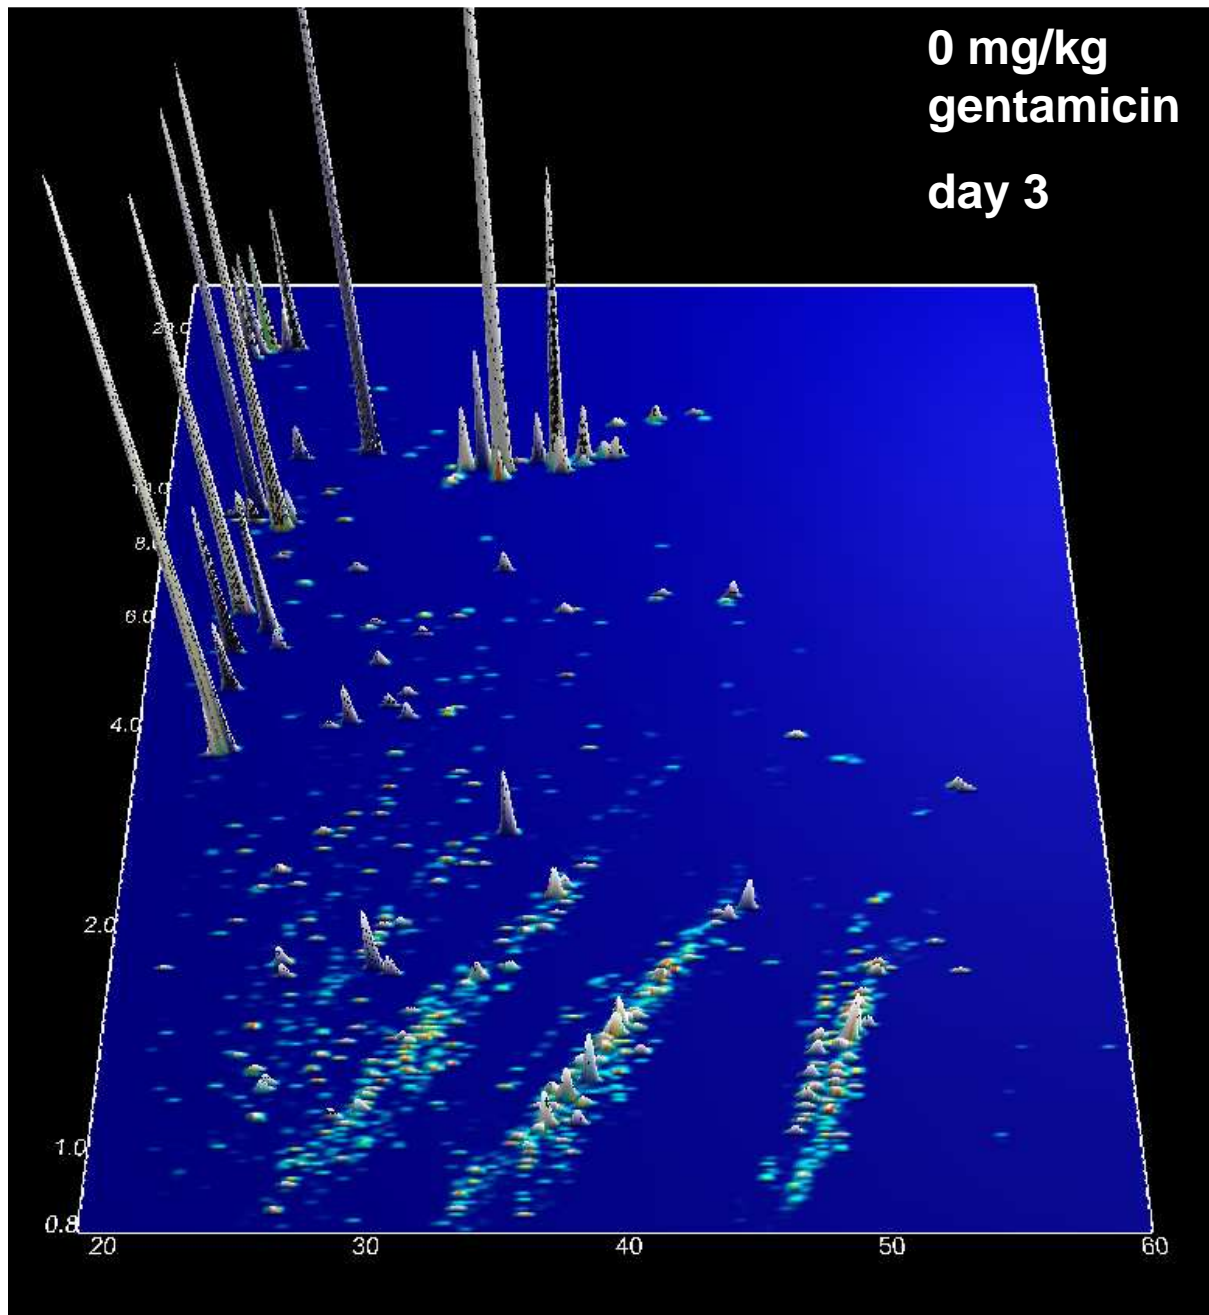

CE-time [min]

0 mg/kg  
gentamicin  
day 7

Mass [kDa]

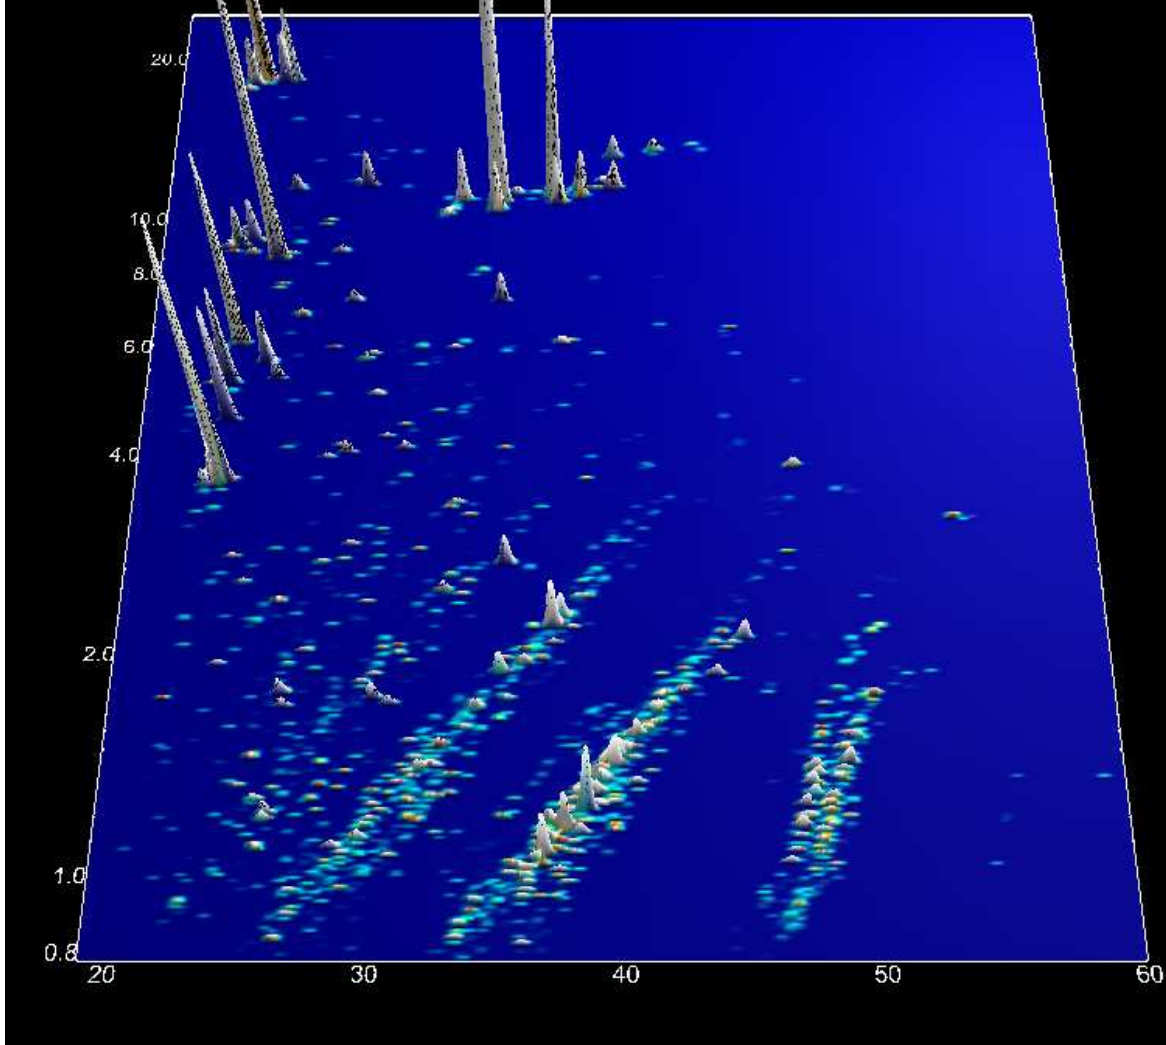

CE-time [min]

0 mg/kg  
gentamicin  
day 10

Mass  
[kDa]

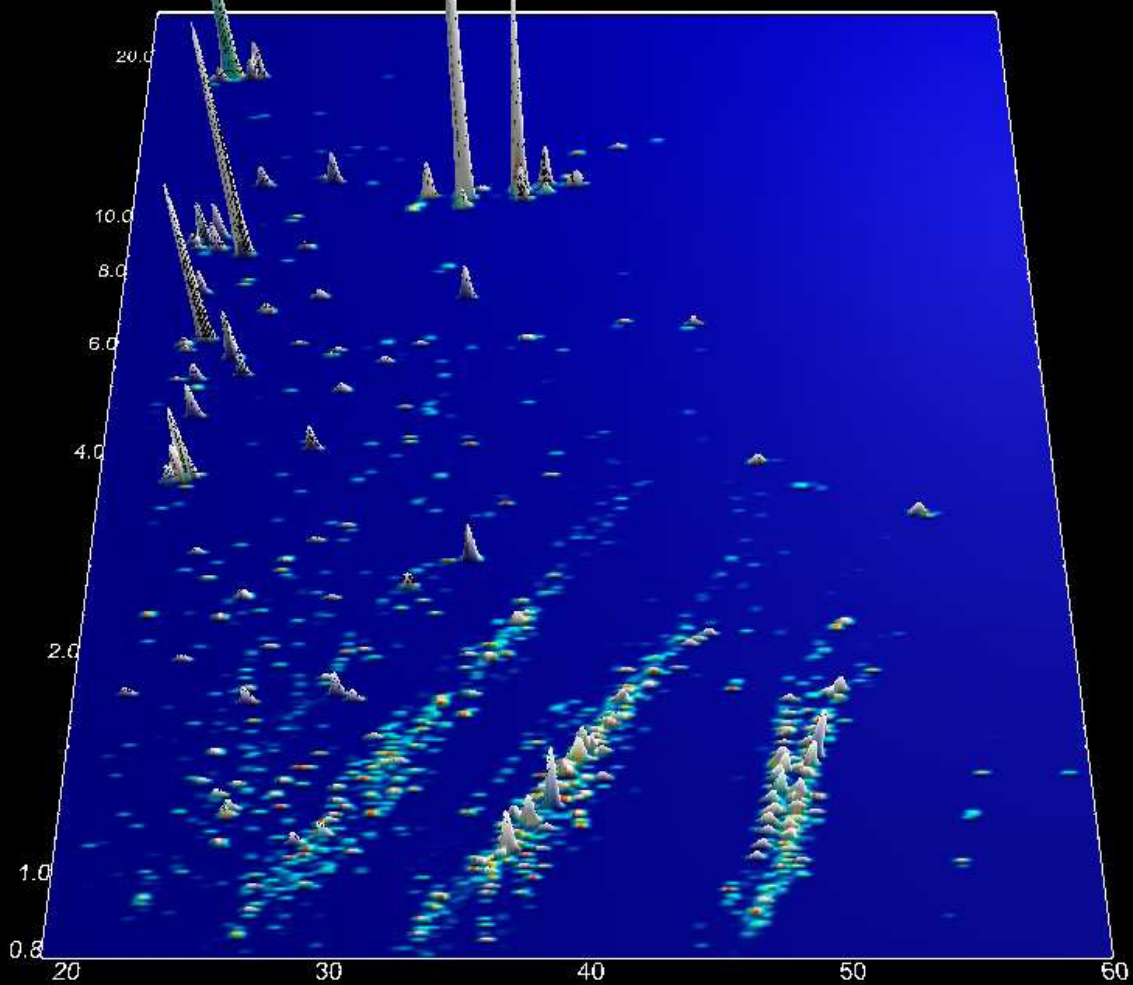

CE-time [min]



0 mg/kg  
gentamicin  
day 15

Mass  
[kDa]

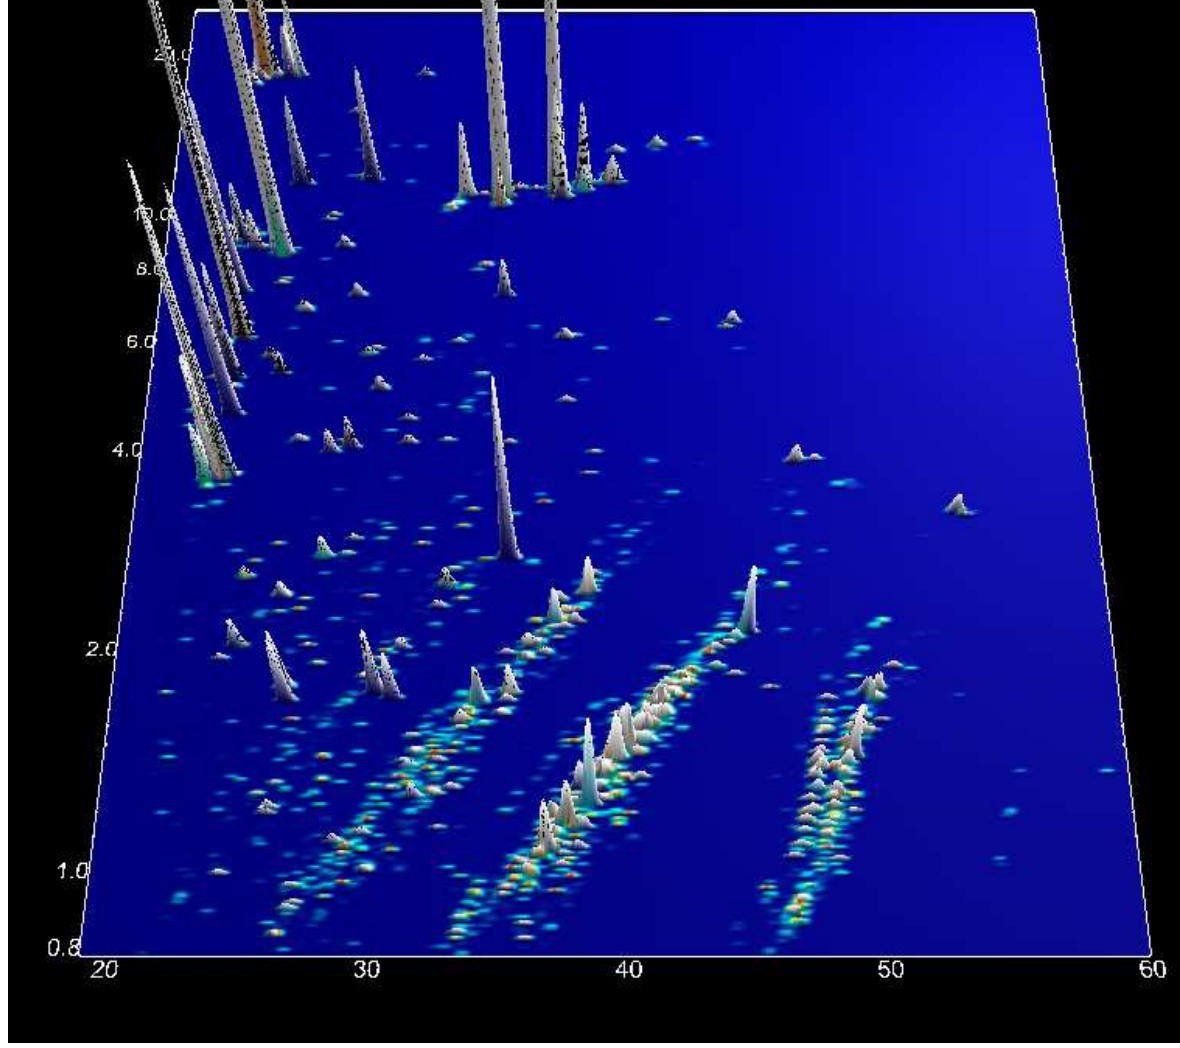

CE-time [min]

0 mg/kg  
gentamicin  
day 18

Mass  
[kDa]

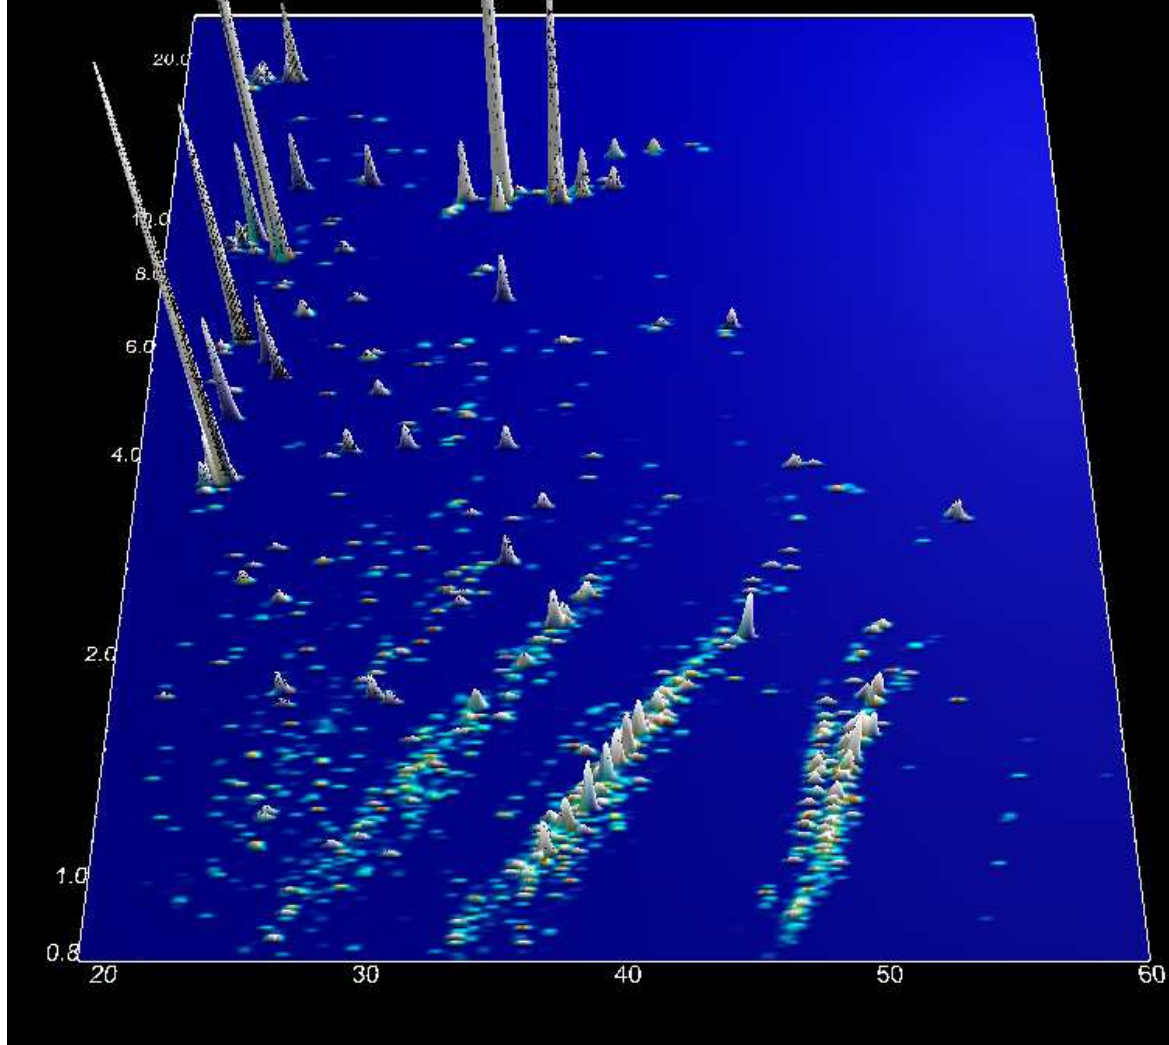

CE-time [min]

0 mg/kg  
gentamicin  
day 22

Mass  
[kDa]

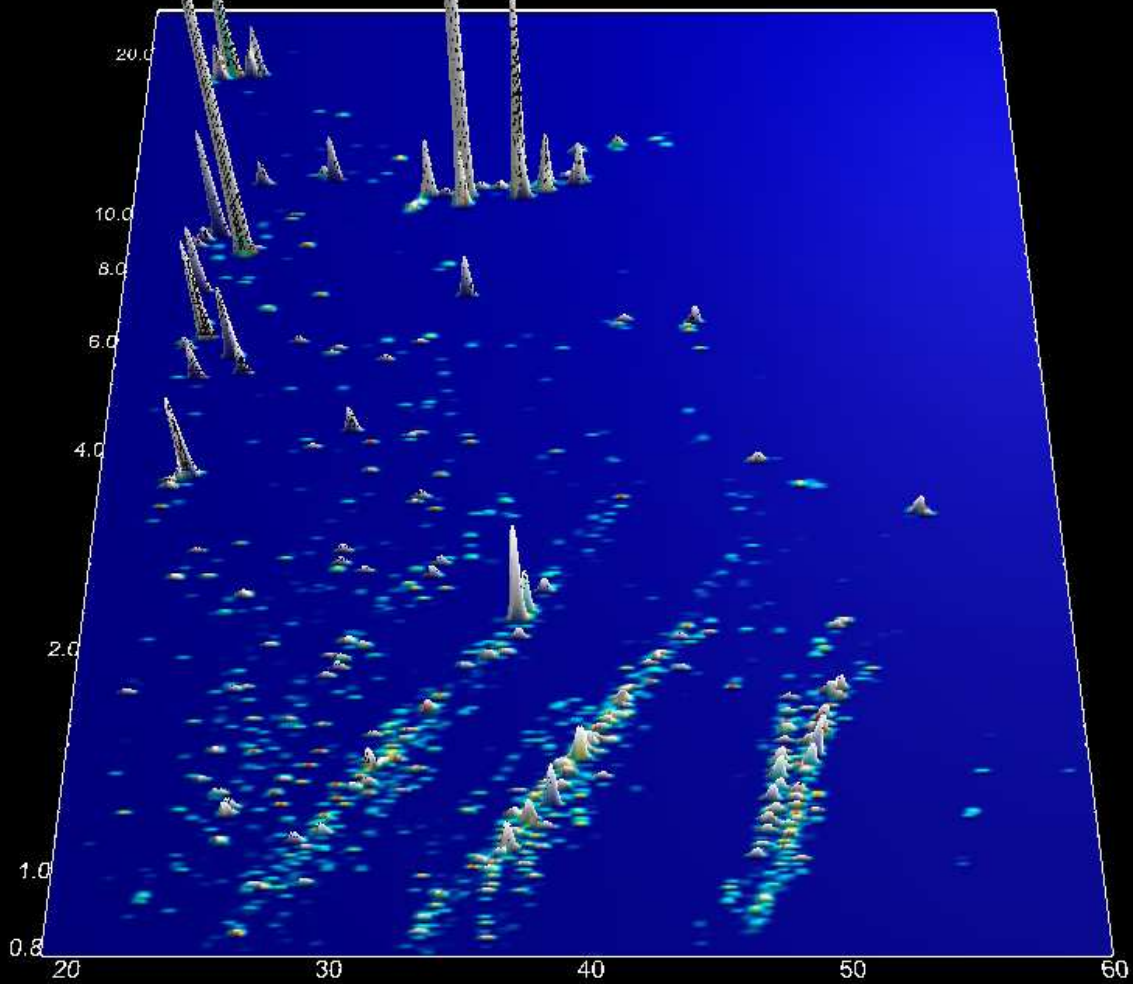

CE-time [min]



0 mg/kg  
gentamicin  
day 29

Mass  
[kDa]

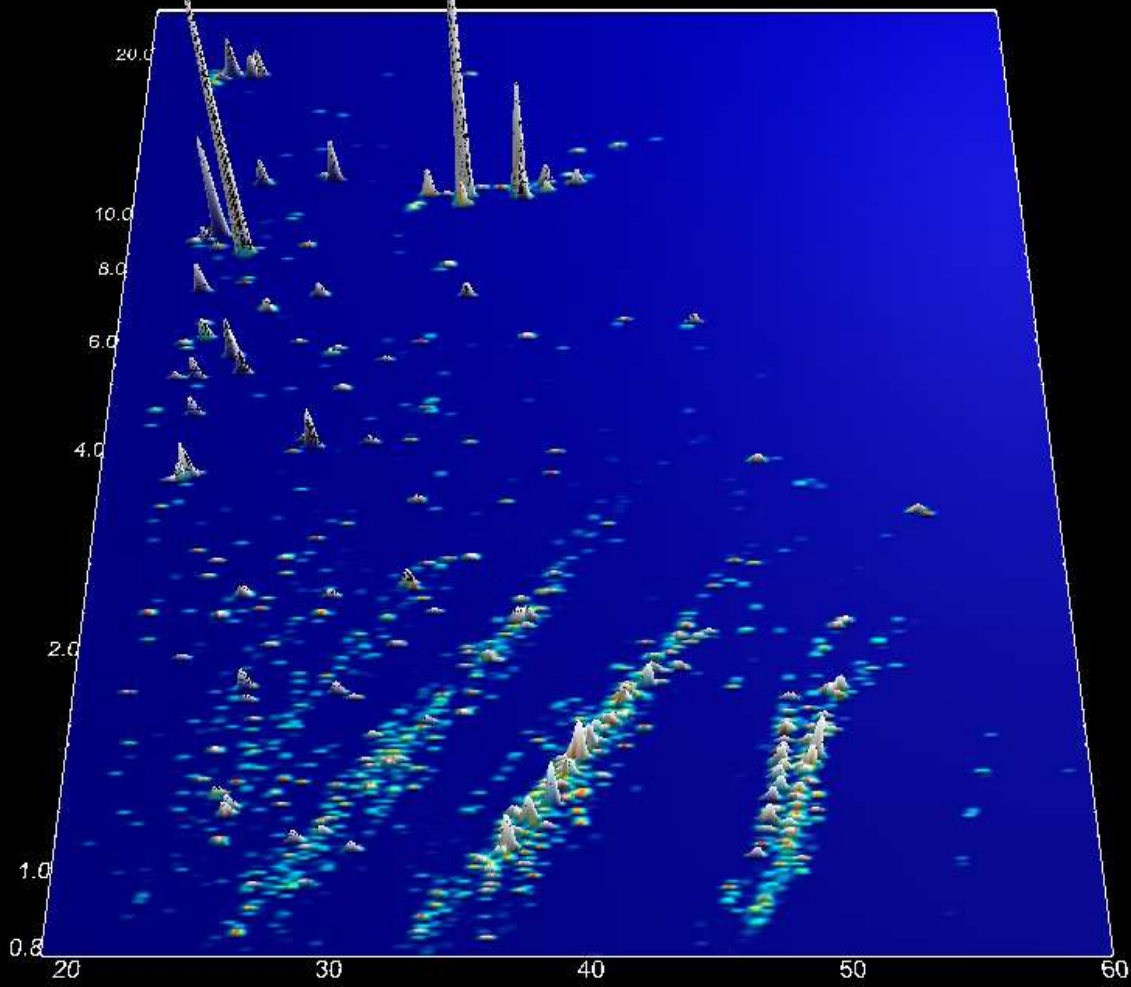

CE-time [min]

0 mg/kg  
gentamicin  
day 36

Mass [kDa]

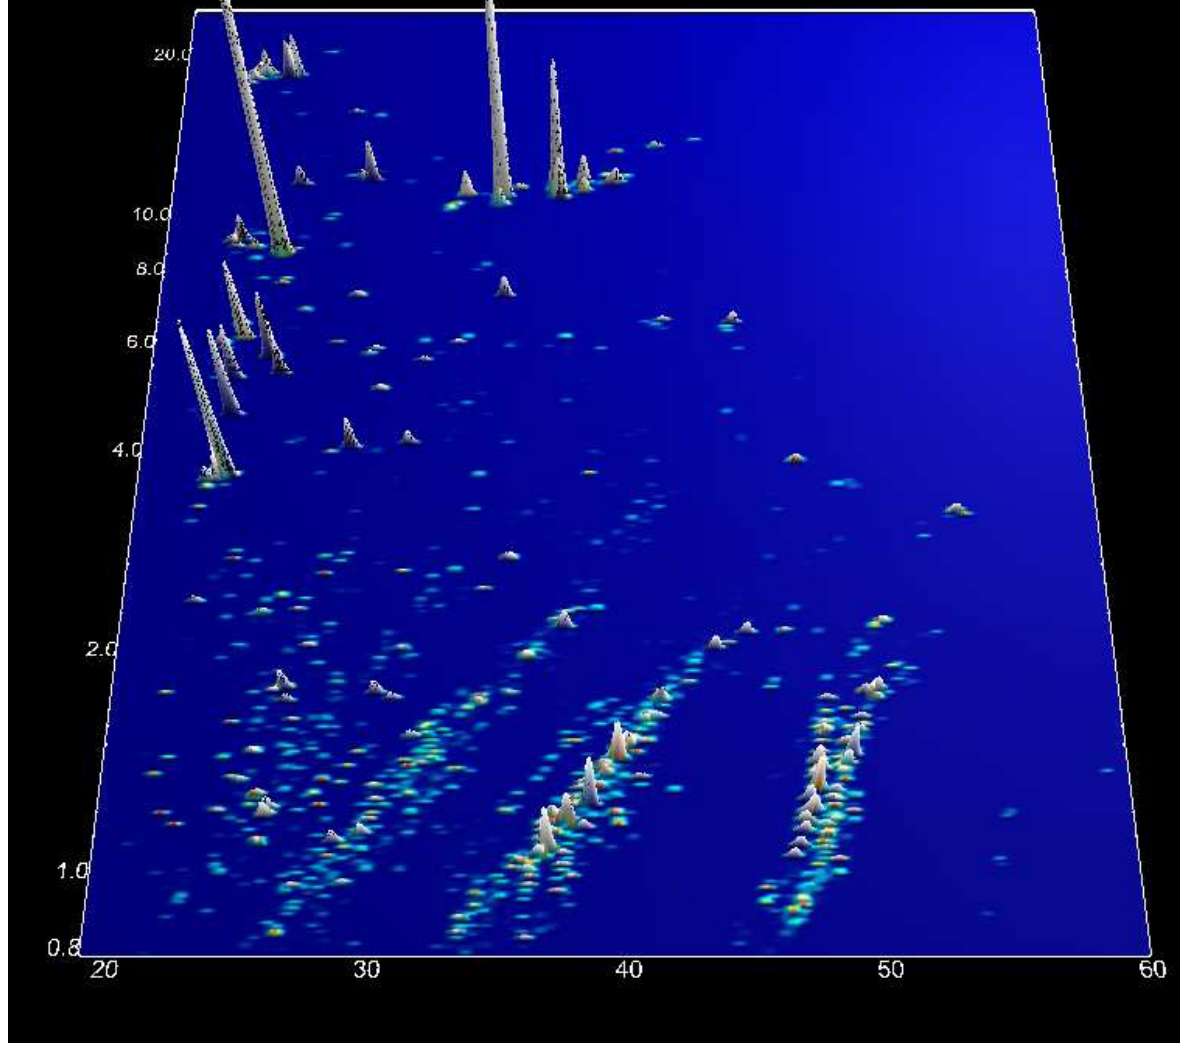

CE-time [min]

0 mg/kg  
gentamicin  
day 44

Mass  
[kDa]

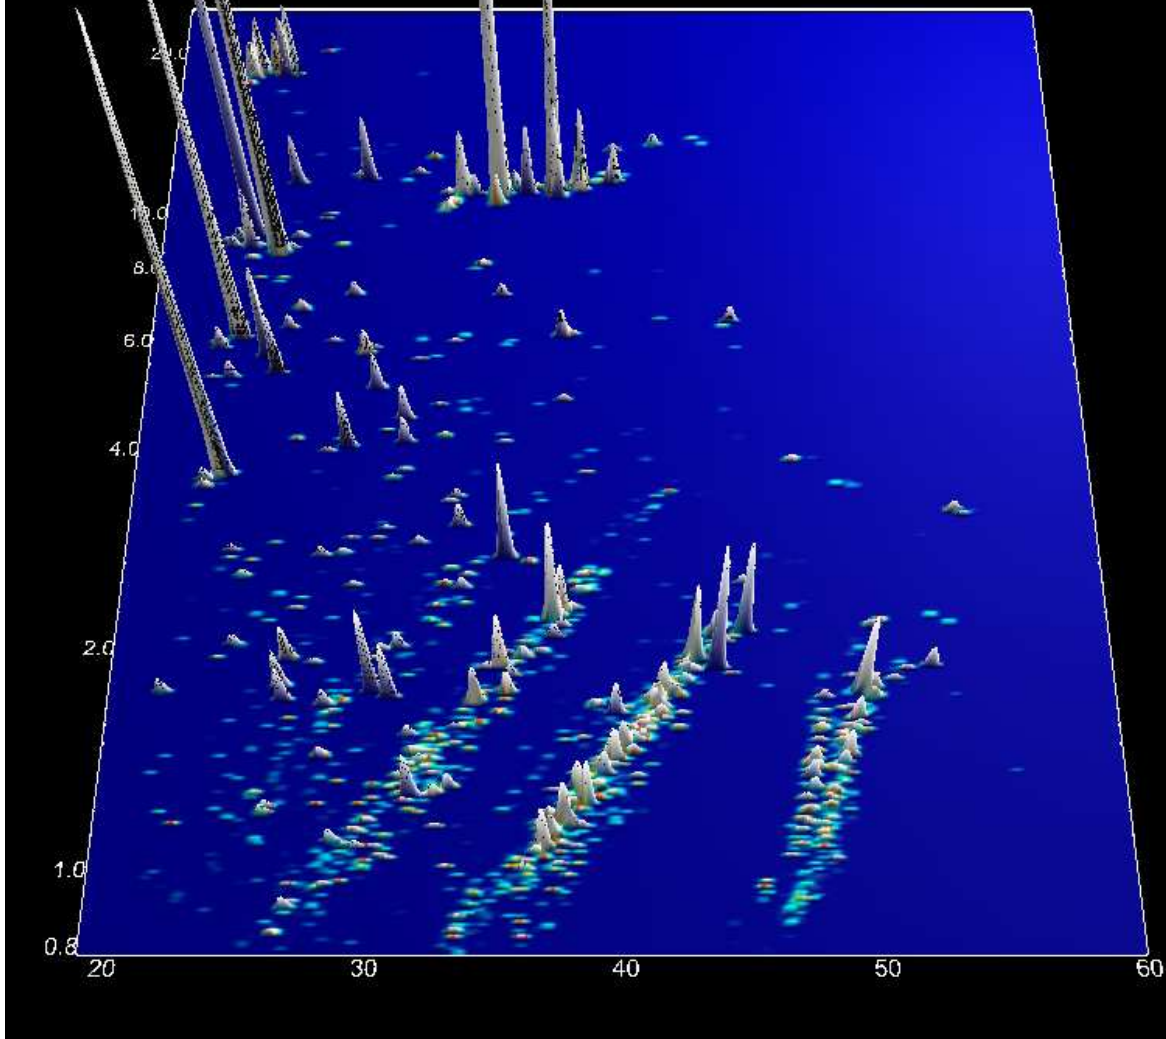

CE-time [min]

150 mg/kg  
gentamicin  
day 1

Mass  
[kDa]

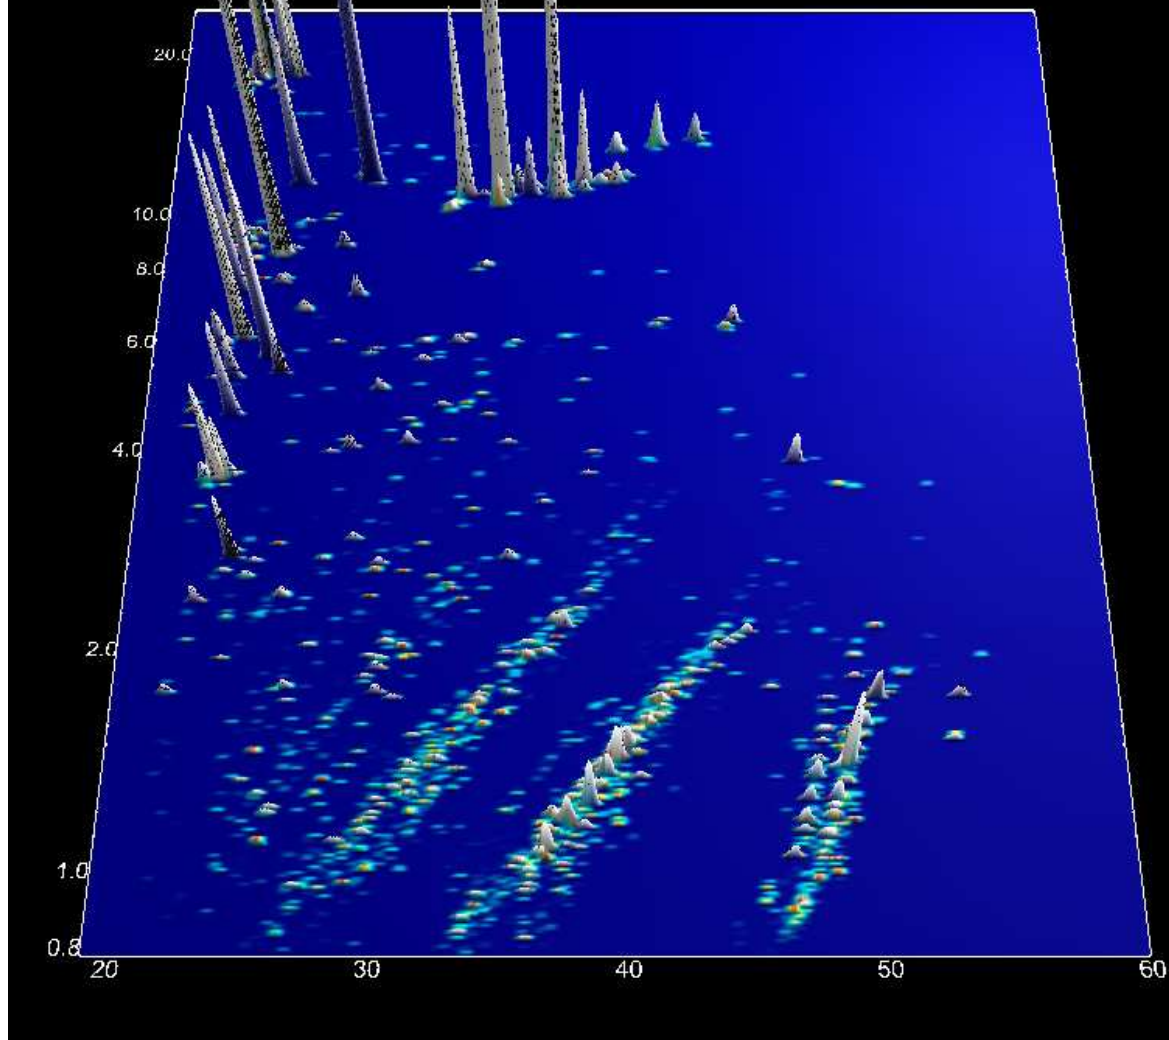

CE-time [min]

150 mg/kg  
gentamicin  
day 2

Mass [kDa]

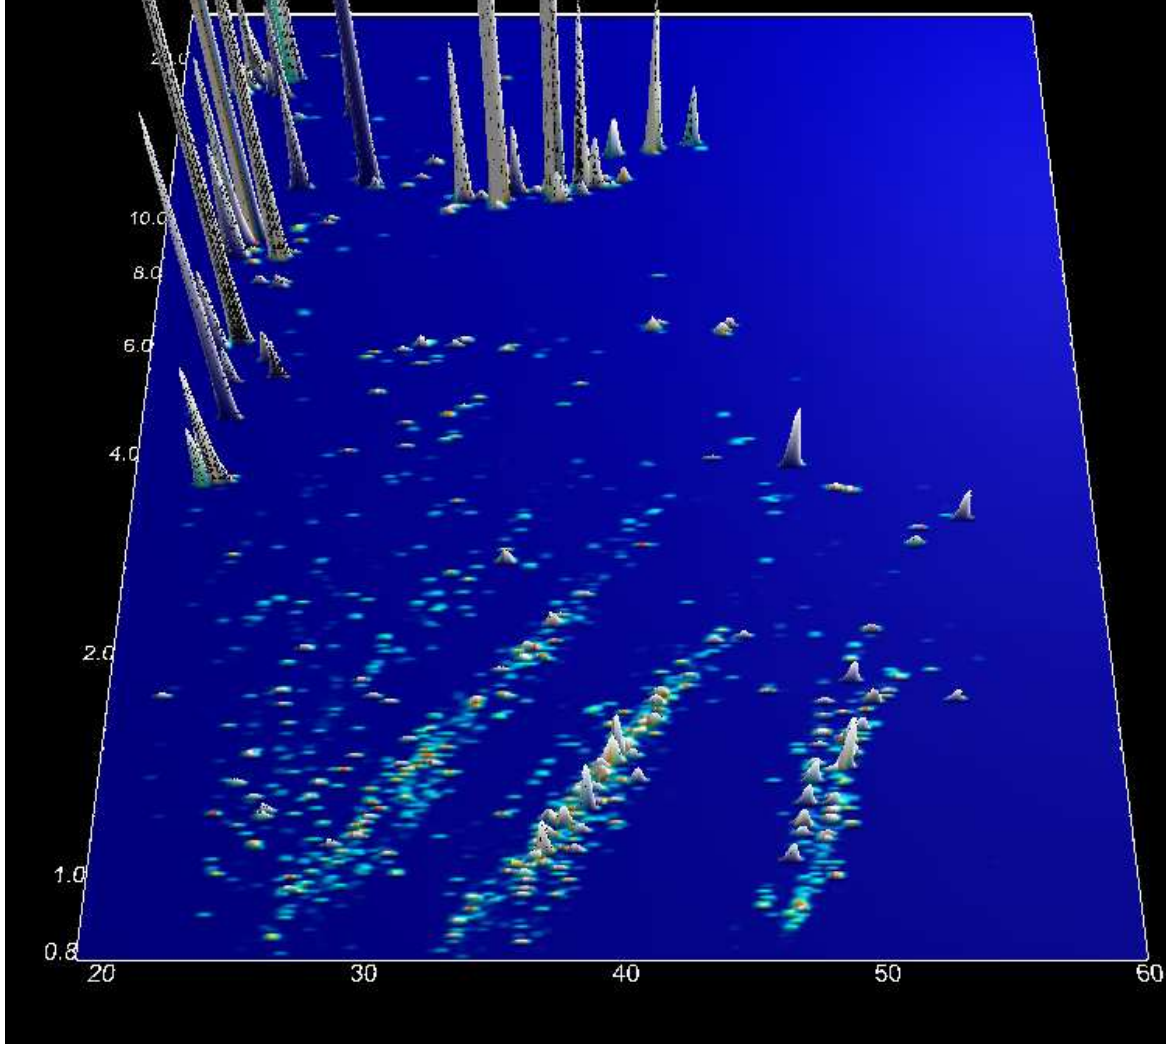

CE-time [min]



150 mg/kg  
gentamicin  
day 3

Mass  
[kDa]

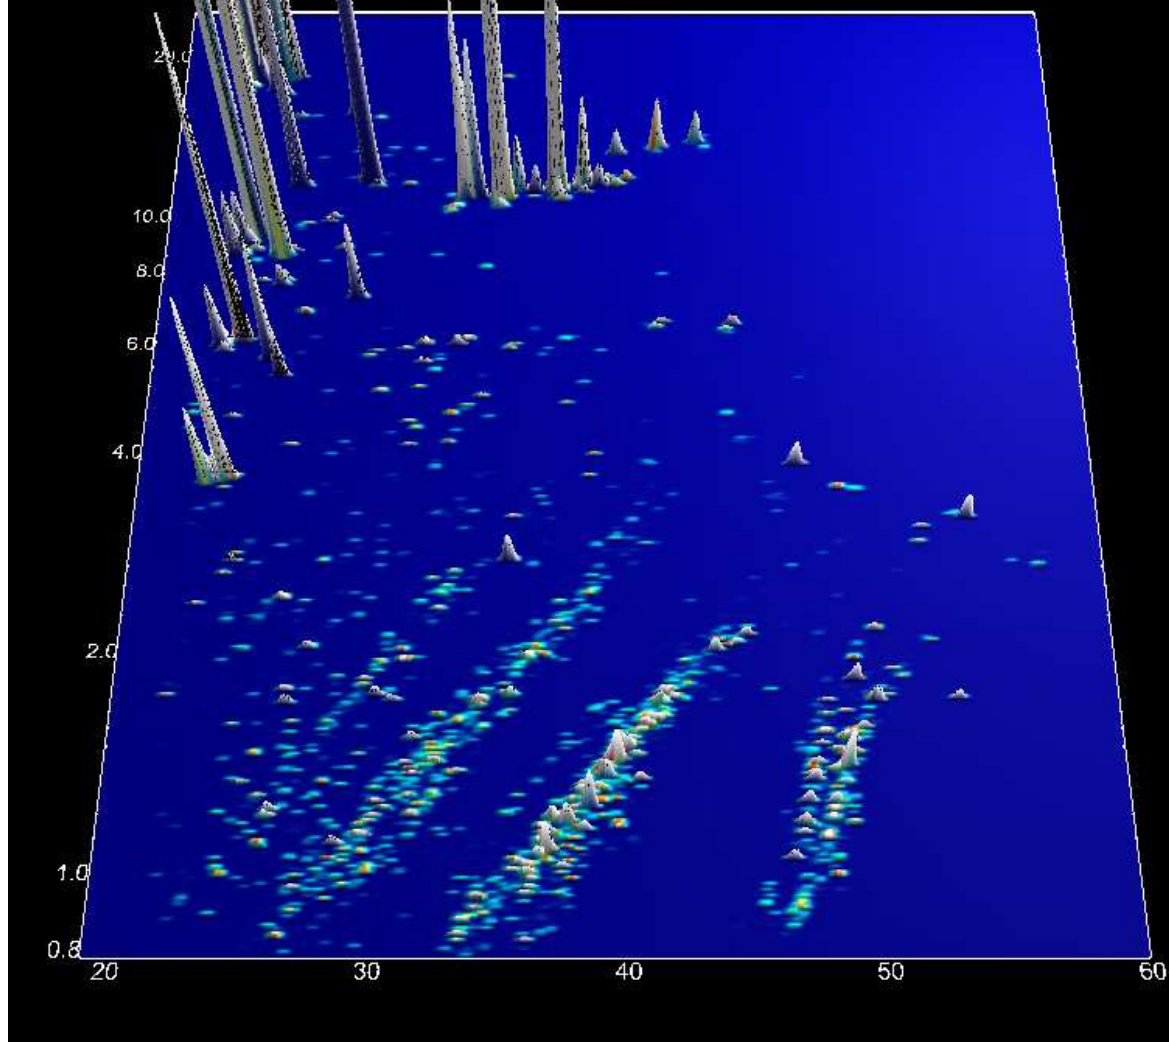

CE-time [min]

150 mg/kg  
gentamicin  
day 7

Mass  
[kDa]

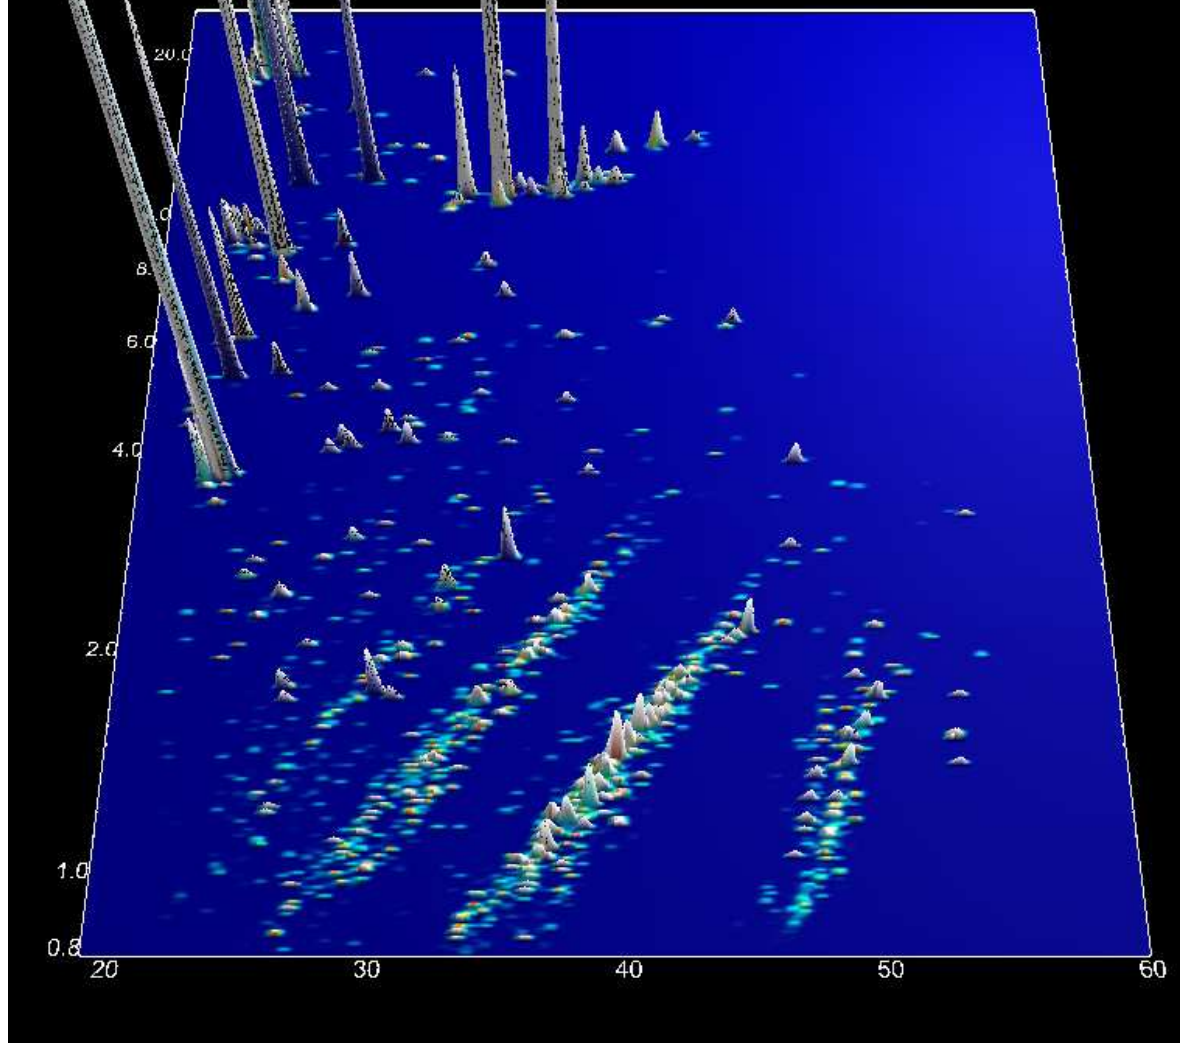

CE-time [min]

150 mg/kg  
gentamicin  
day 10

Mass [kDa]

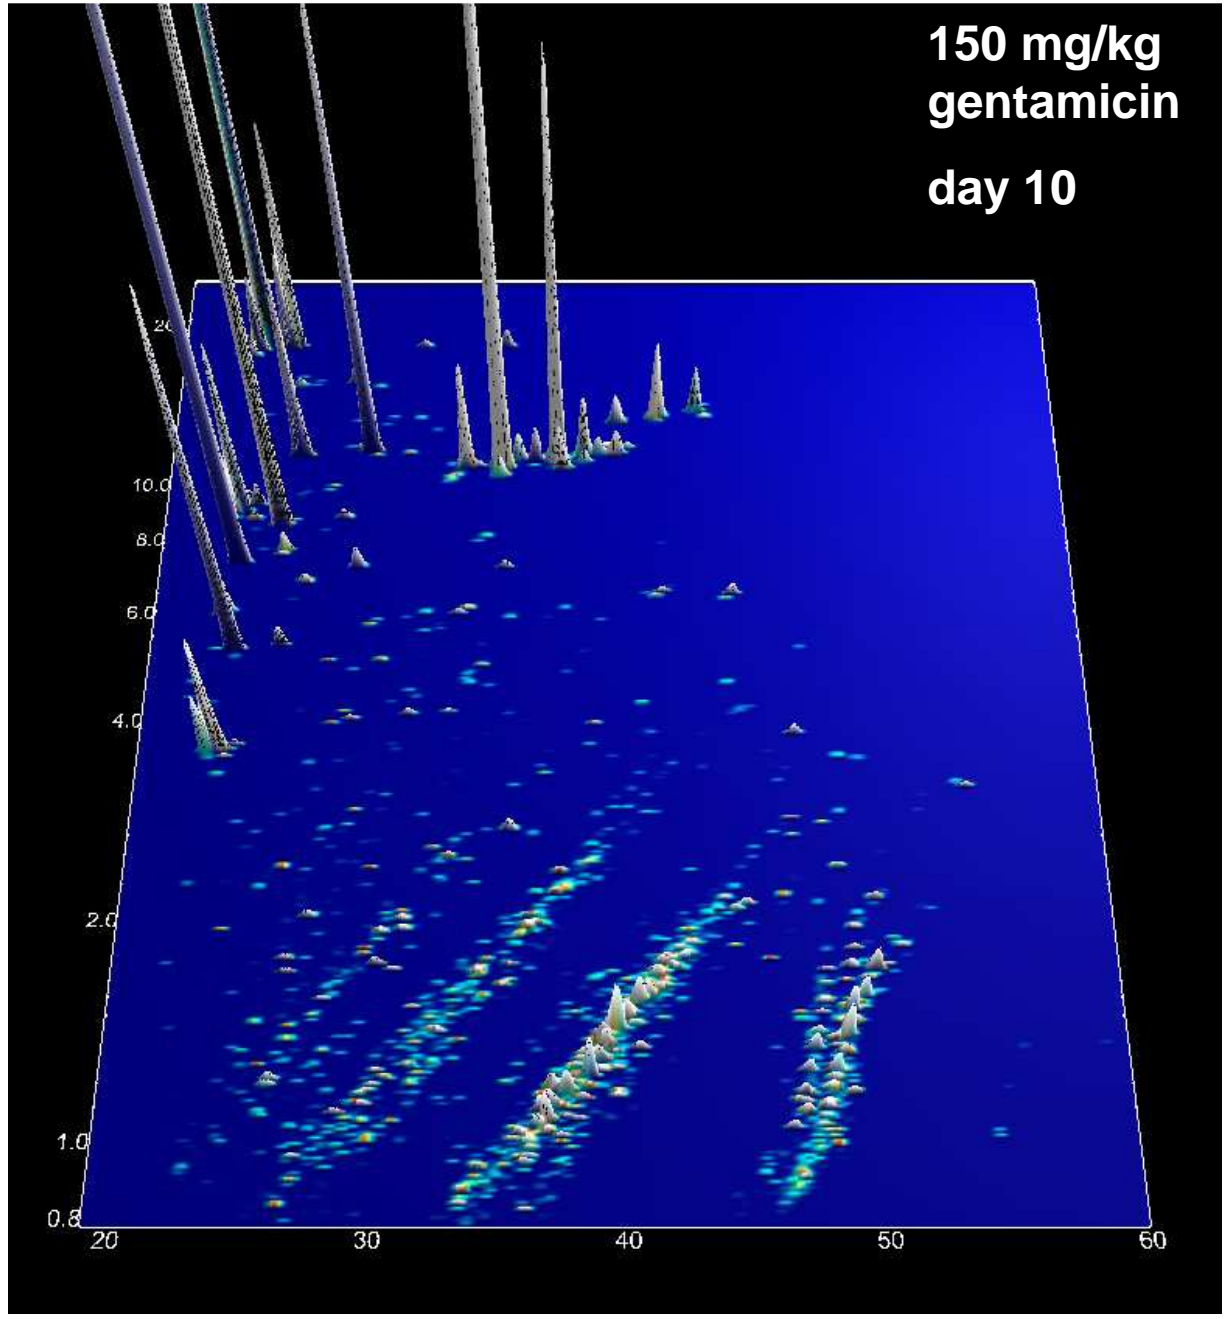

CE-time [min]

150 mg/kg  
gentamicin  
day 15

Mass  
[kDa]

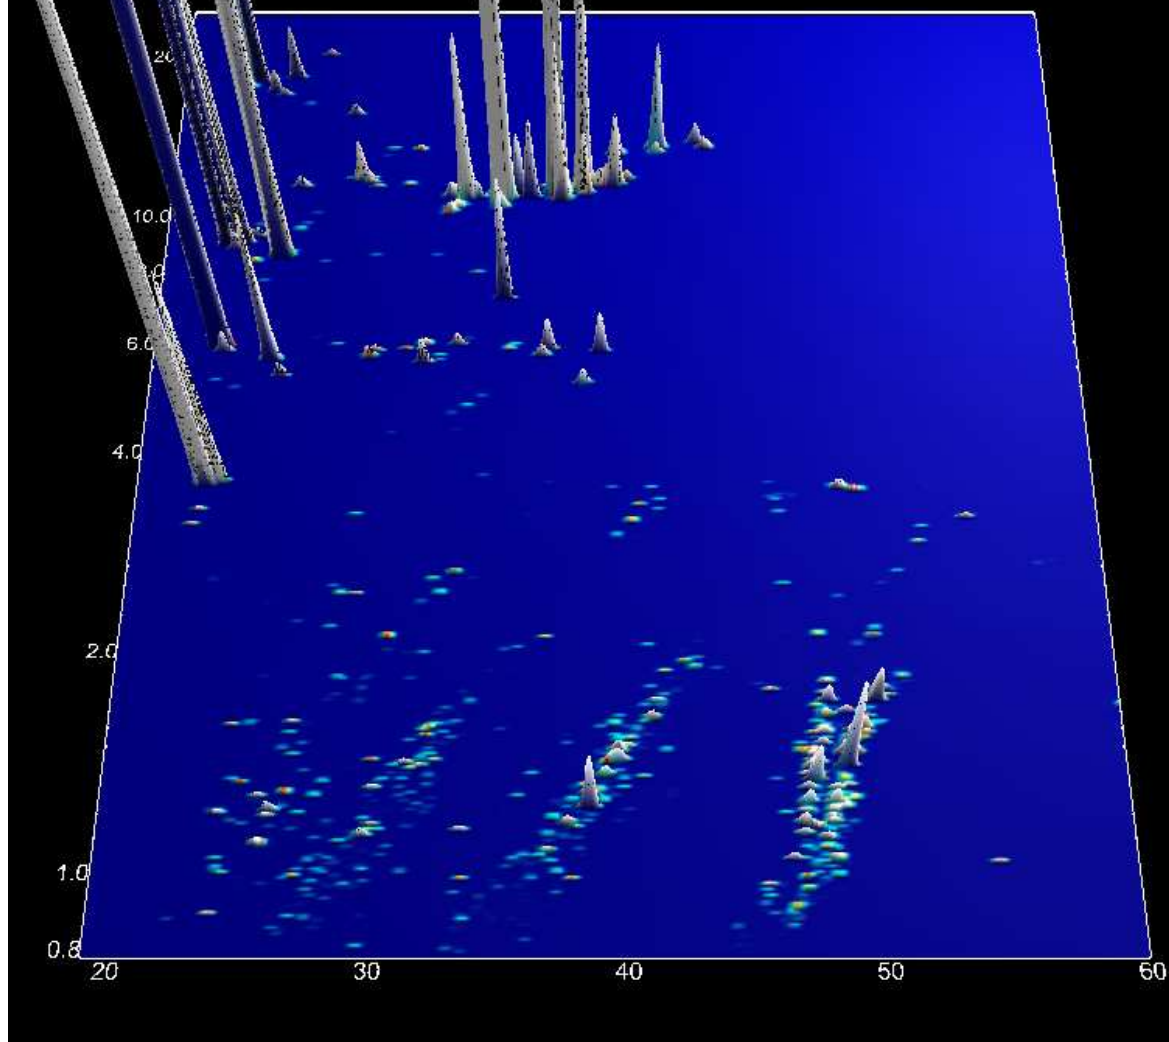

CE-time [min]



150 mg/kg  
gentamicin  
day 18

Mass [kDa]

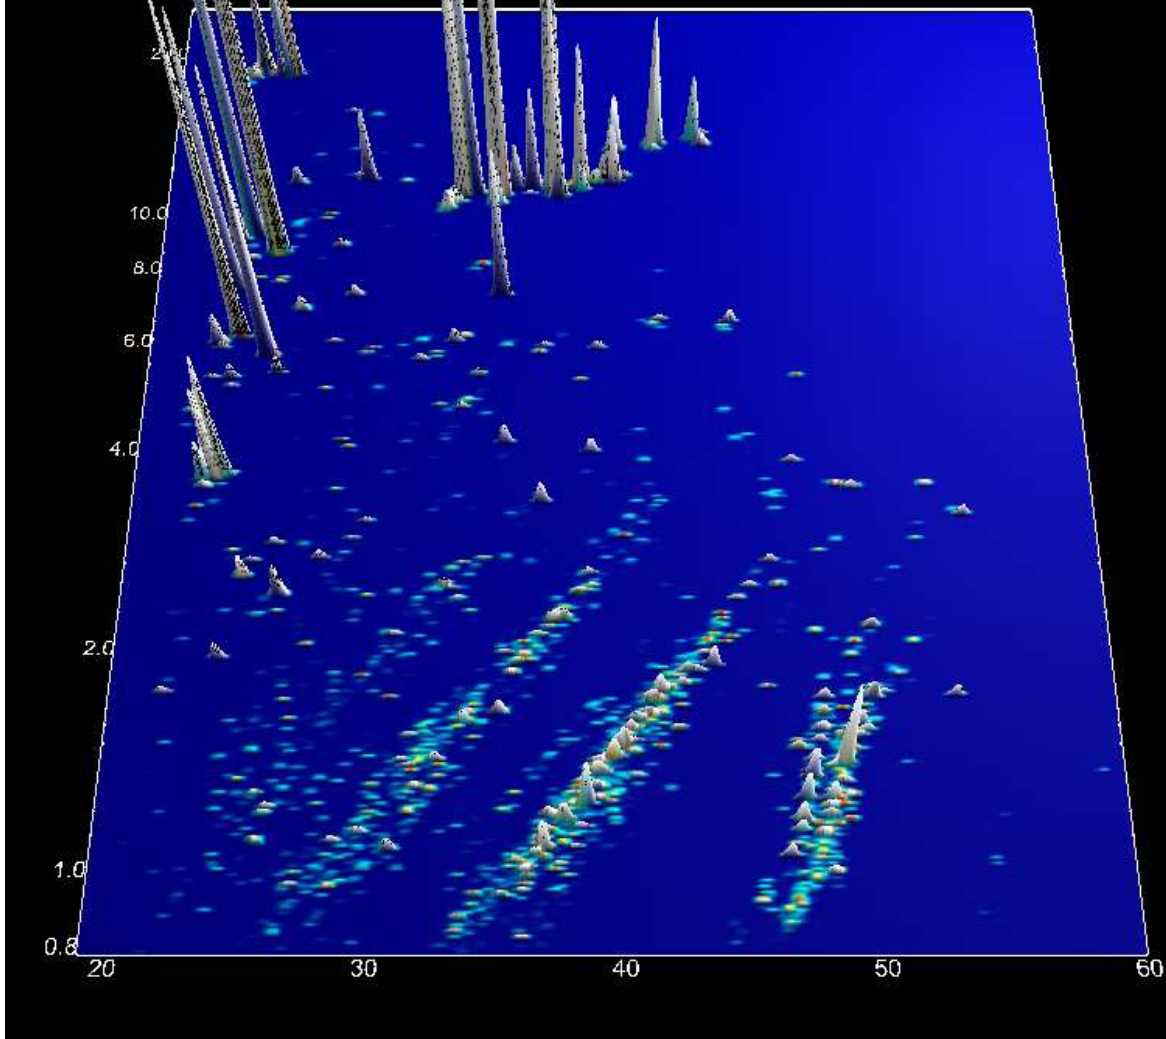

CE-time [min]



150 mg/kg  
gentamicin  
day 22

Mass  
[kDa]

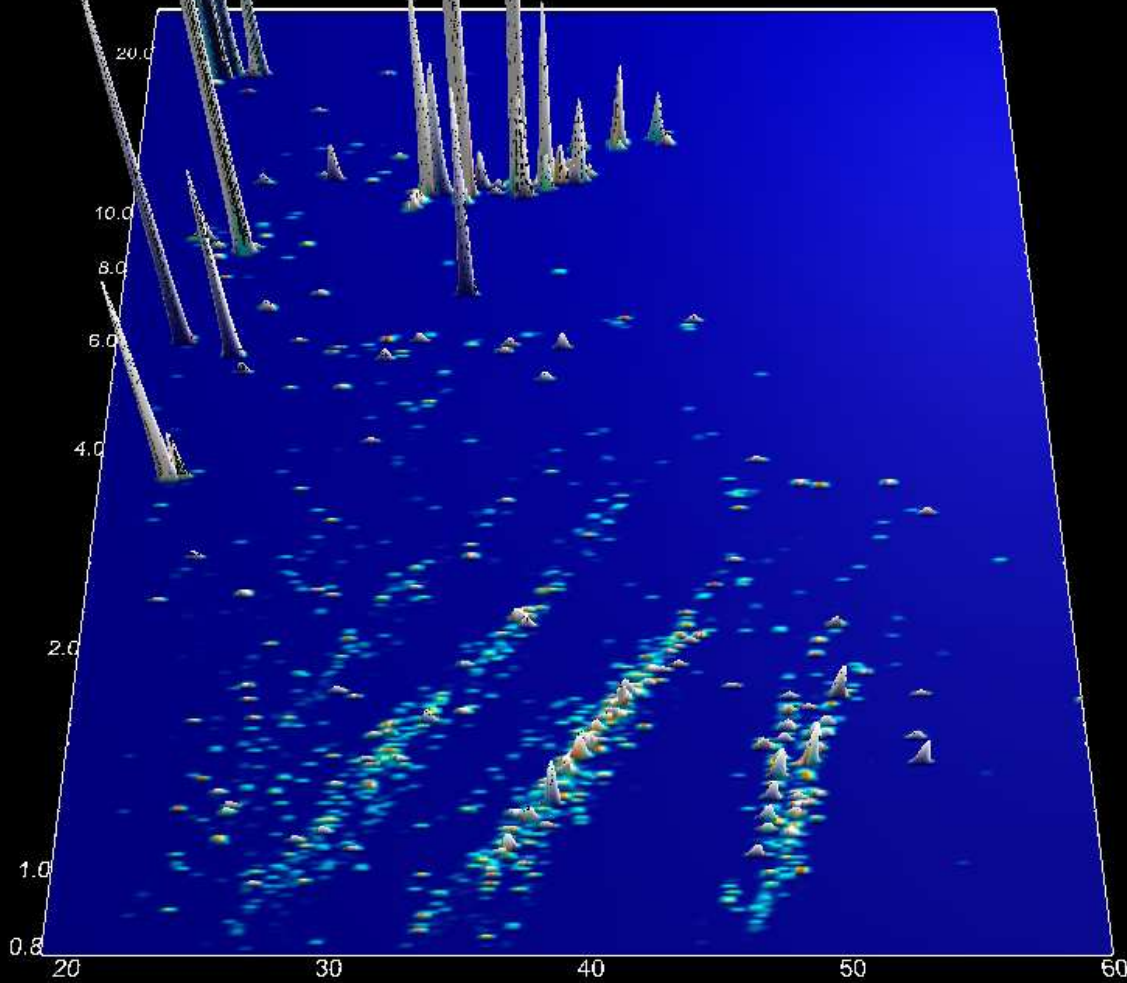

CE-time [min]

150 mg/kg  
gentamicin  
day 29

Mass  
[kDa]

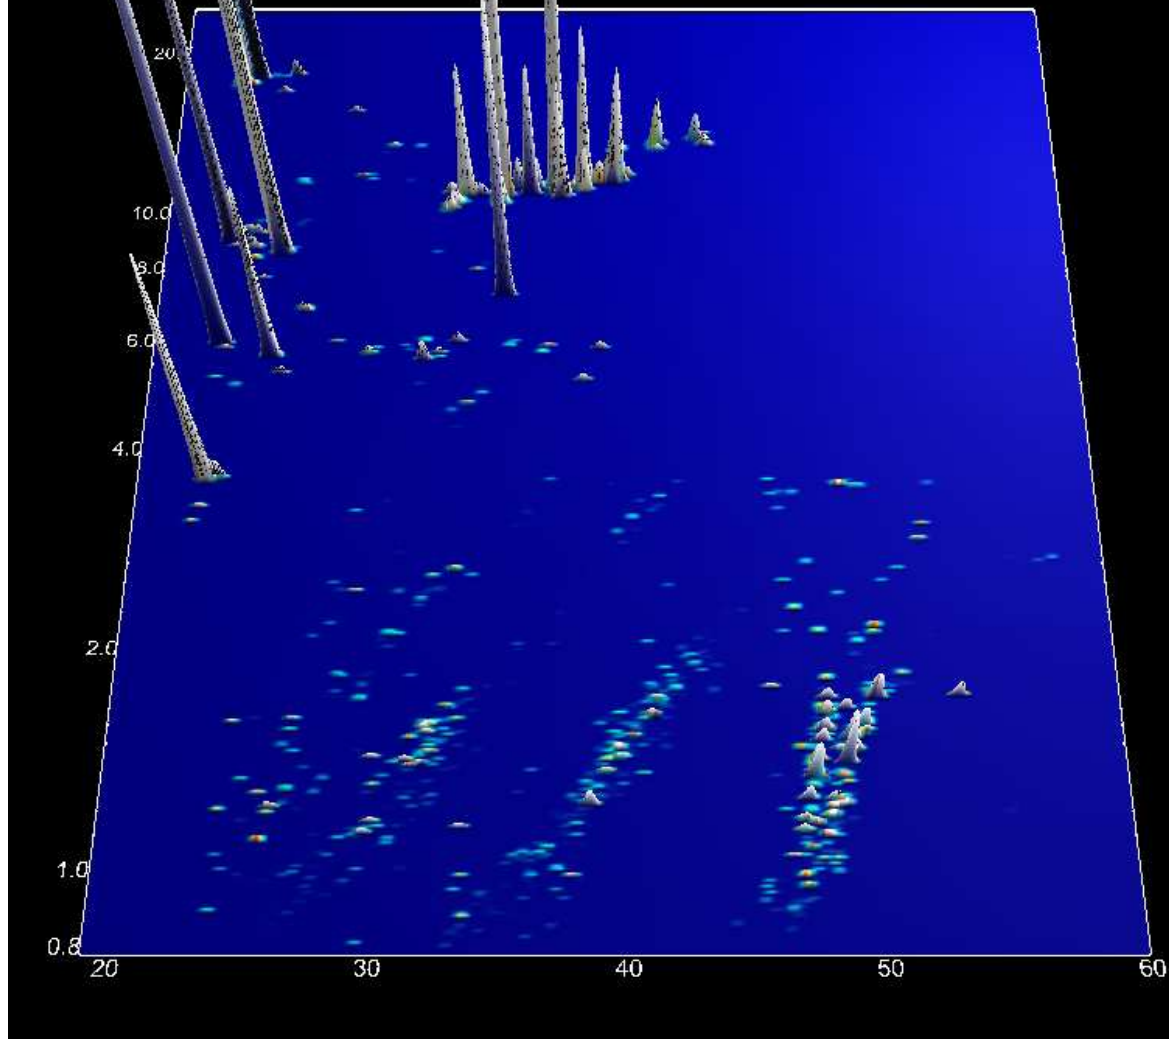

CE-time [min]

**150 mg/kg  
gentamicin  
day 36**

Mass  
[kDa]

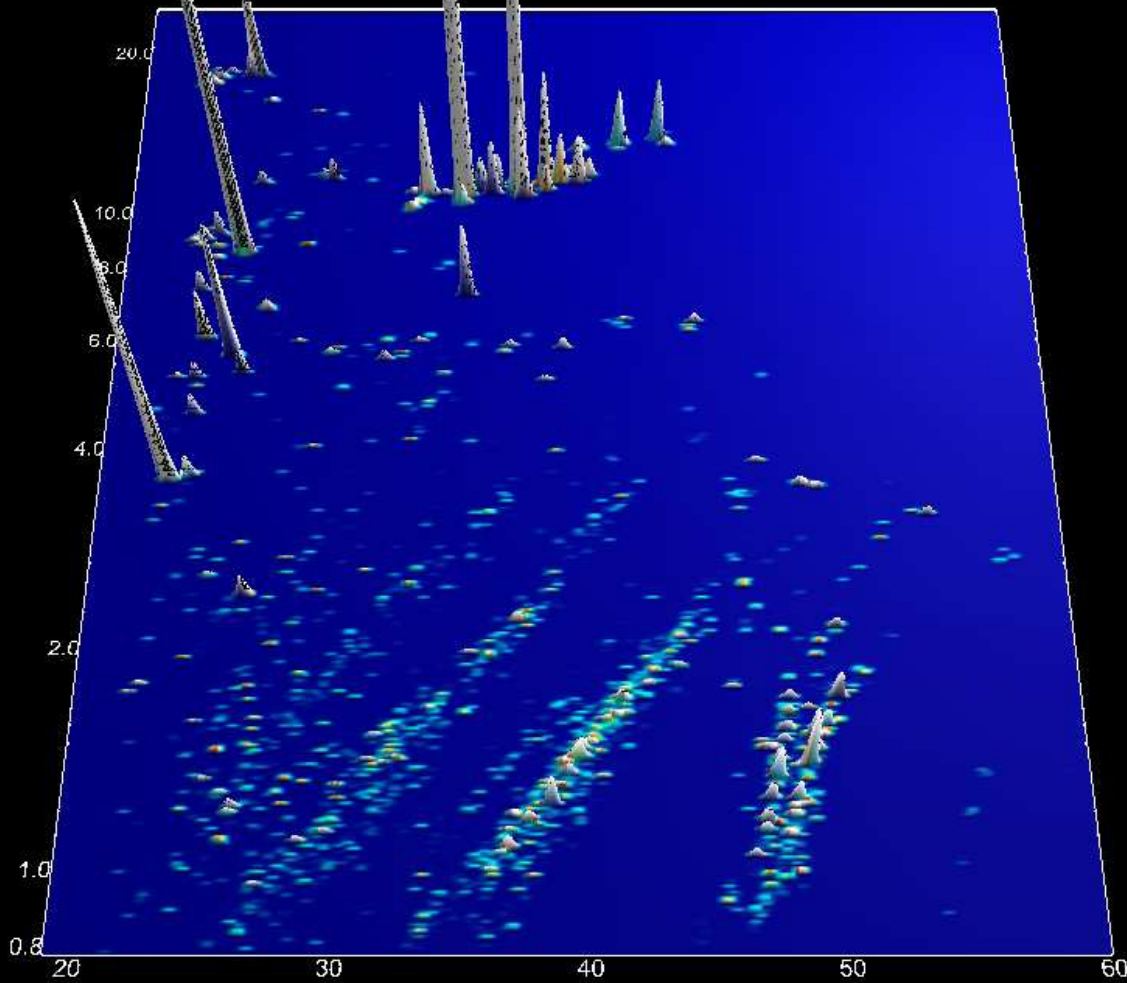

CE-time [min]

150 mg/kg  
gentamicin  
day 44

Mass  
[kDa]

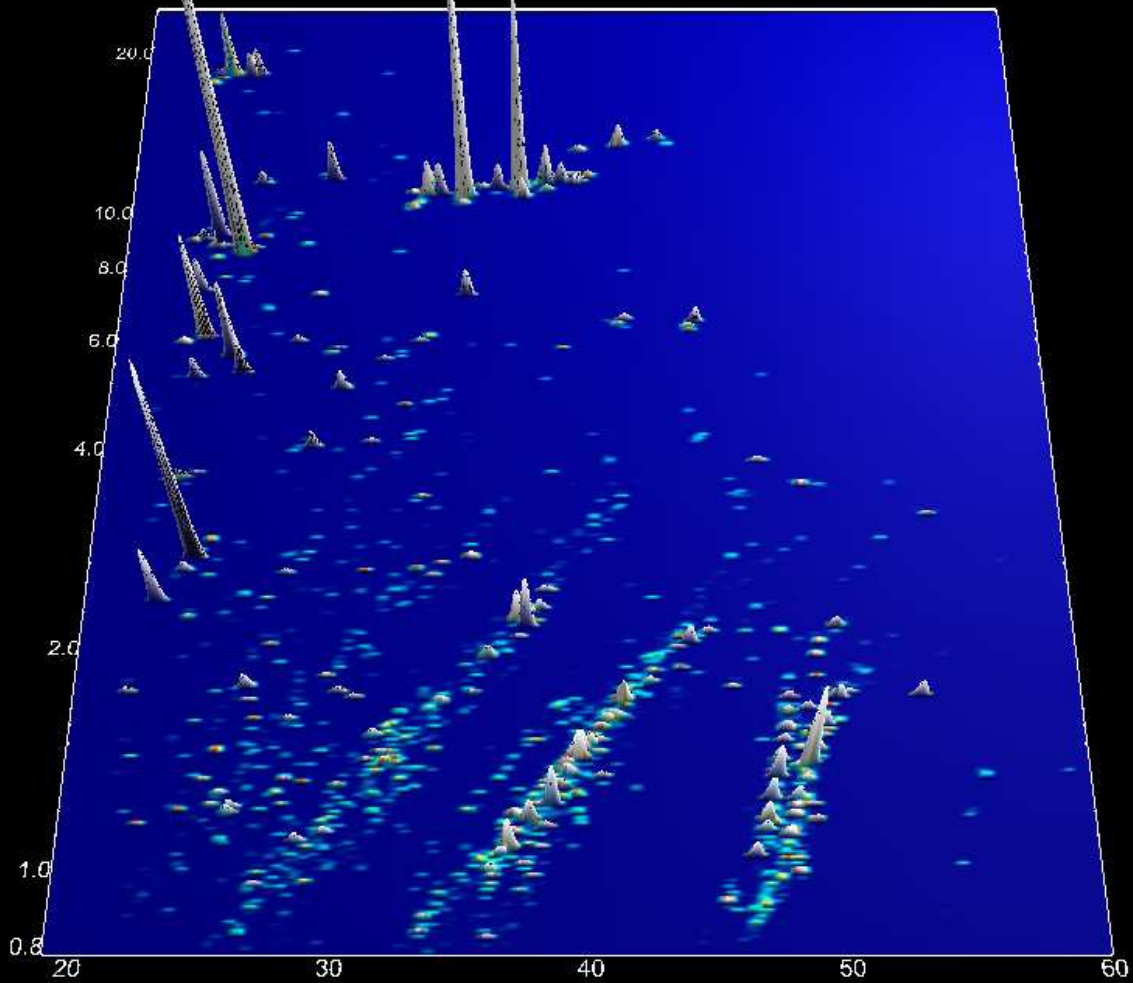

CE-time [min]

300 mg/kg  
gentamicin  
day 1

Mass  
[kDa]

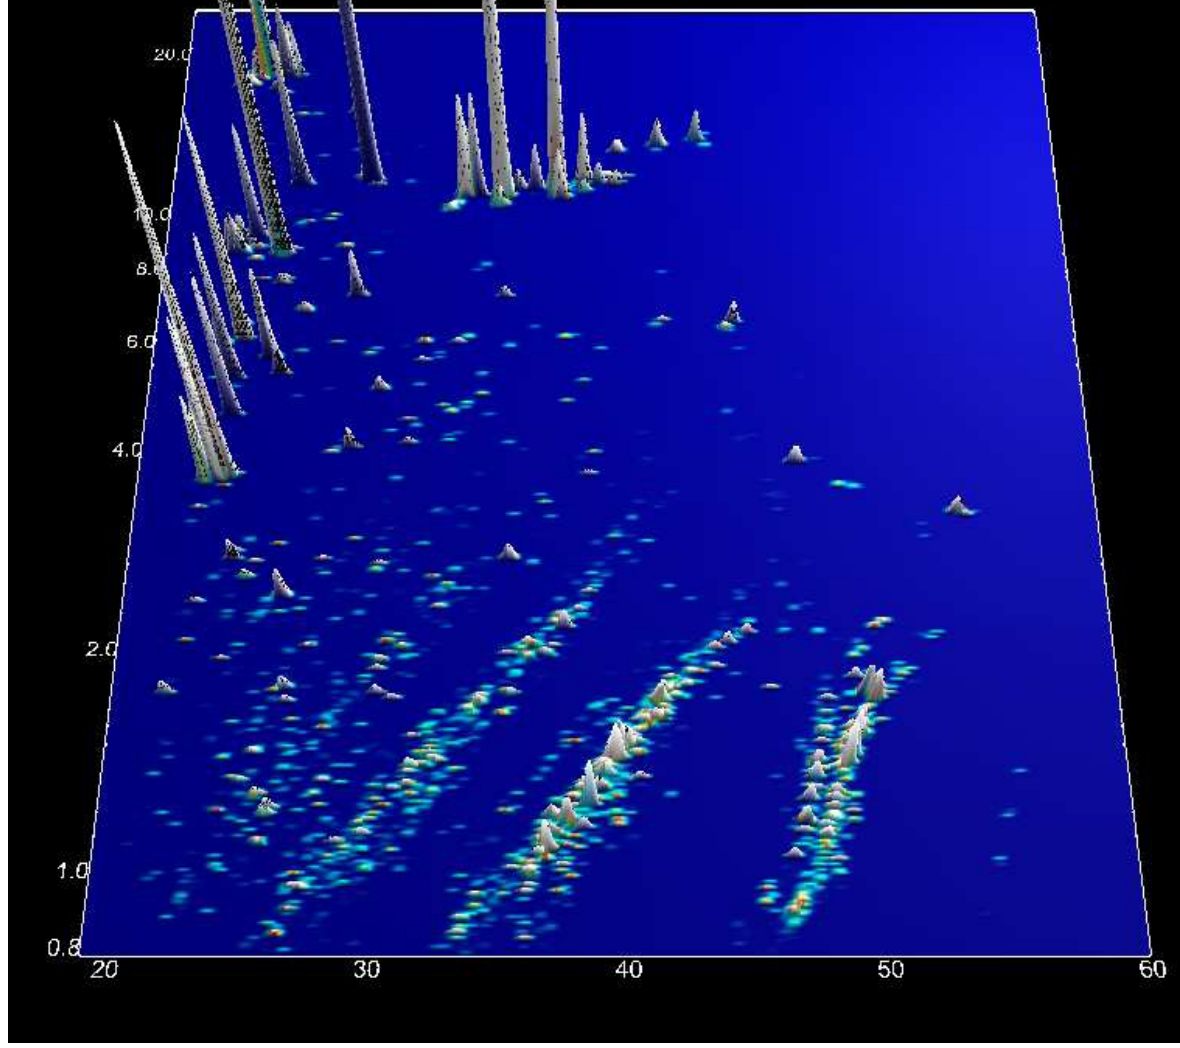

CE-time [min]



300 mg/kg  
gentamicin  
day 2

Mass  
[kDa]

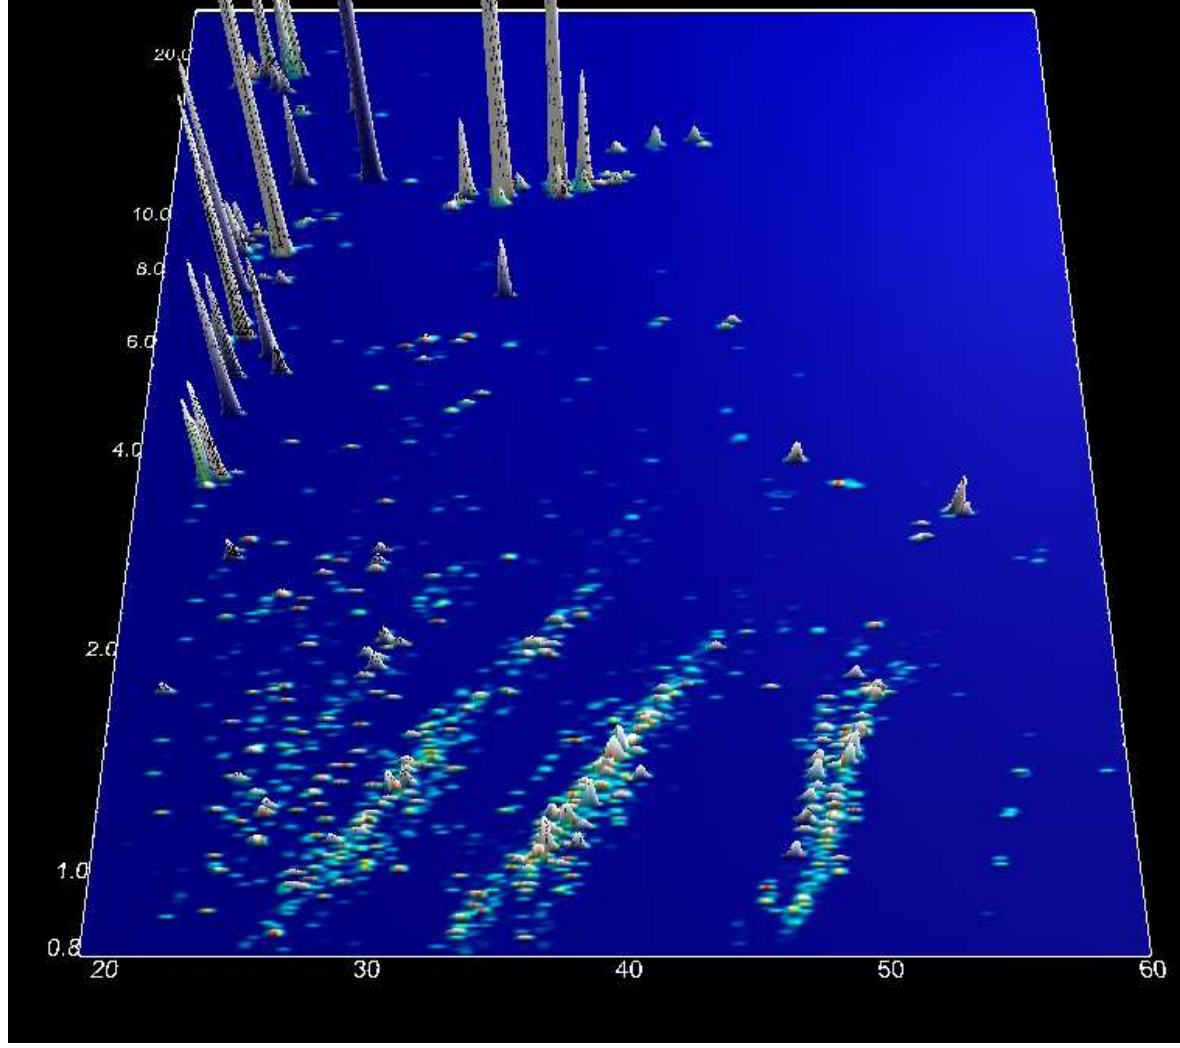

CE-time [min]

**300 mg/kg  
gentamicin  
day 3**

Mass  
[kDa]

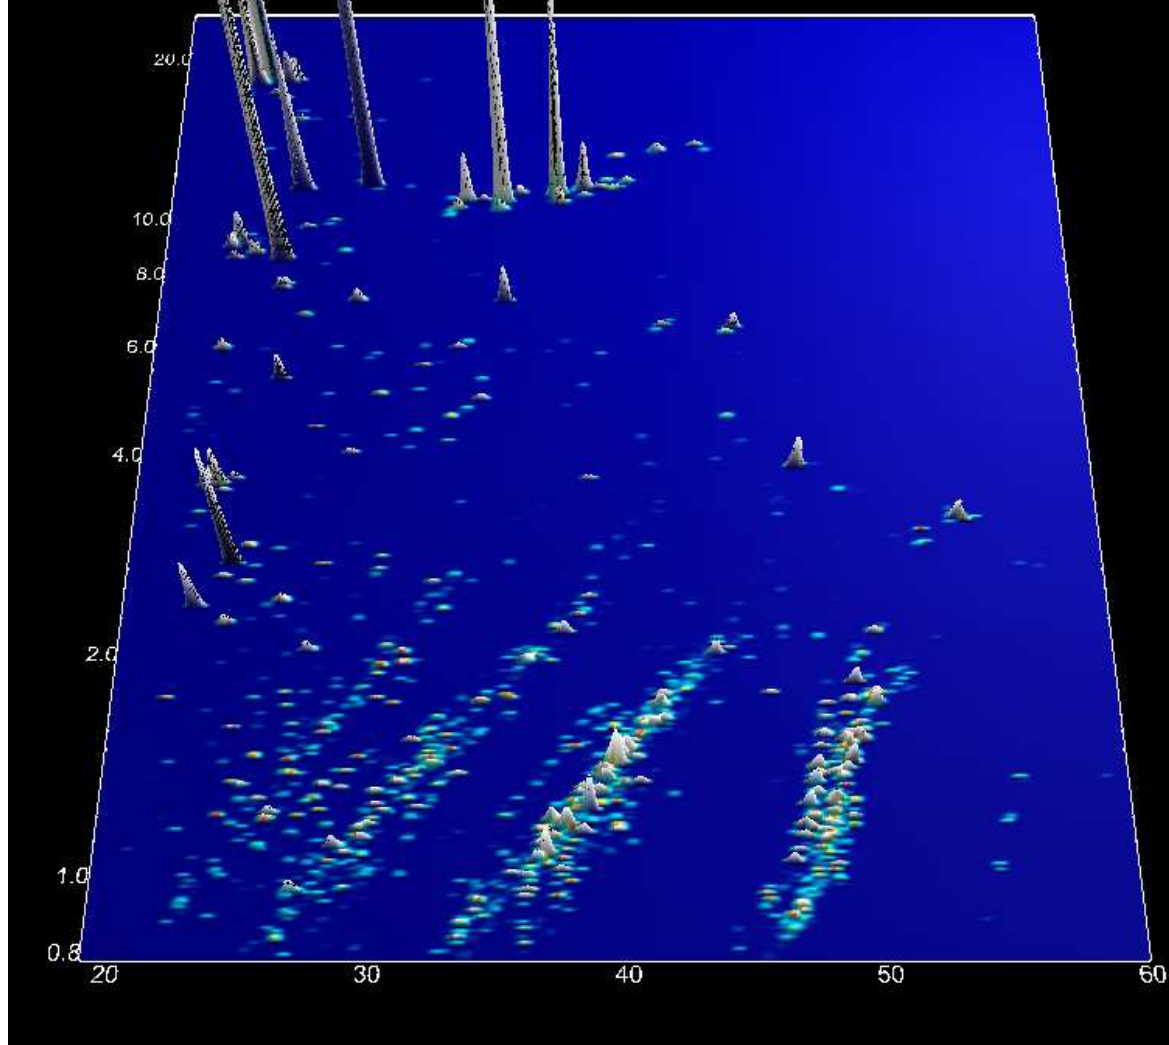

CE-time [min]

300 mg/kg  
gentamicin  
day 7

Mass  
[kDa]

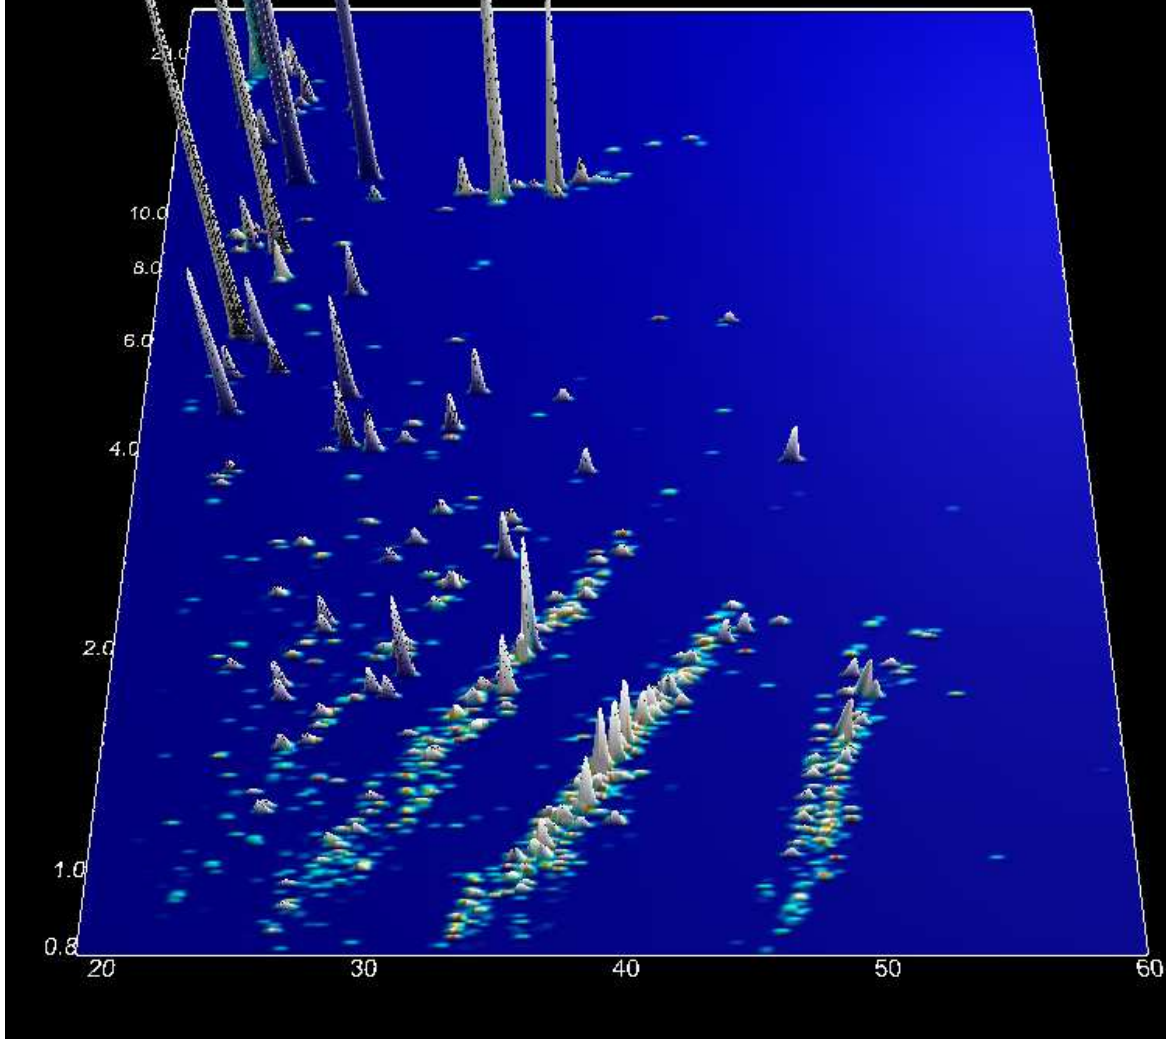

CE-time [min]

**300 mg/kg  
gentamicin  
day 9**

Mass [kDa]

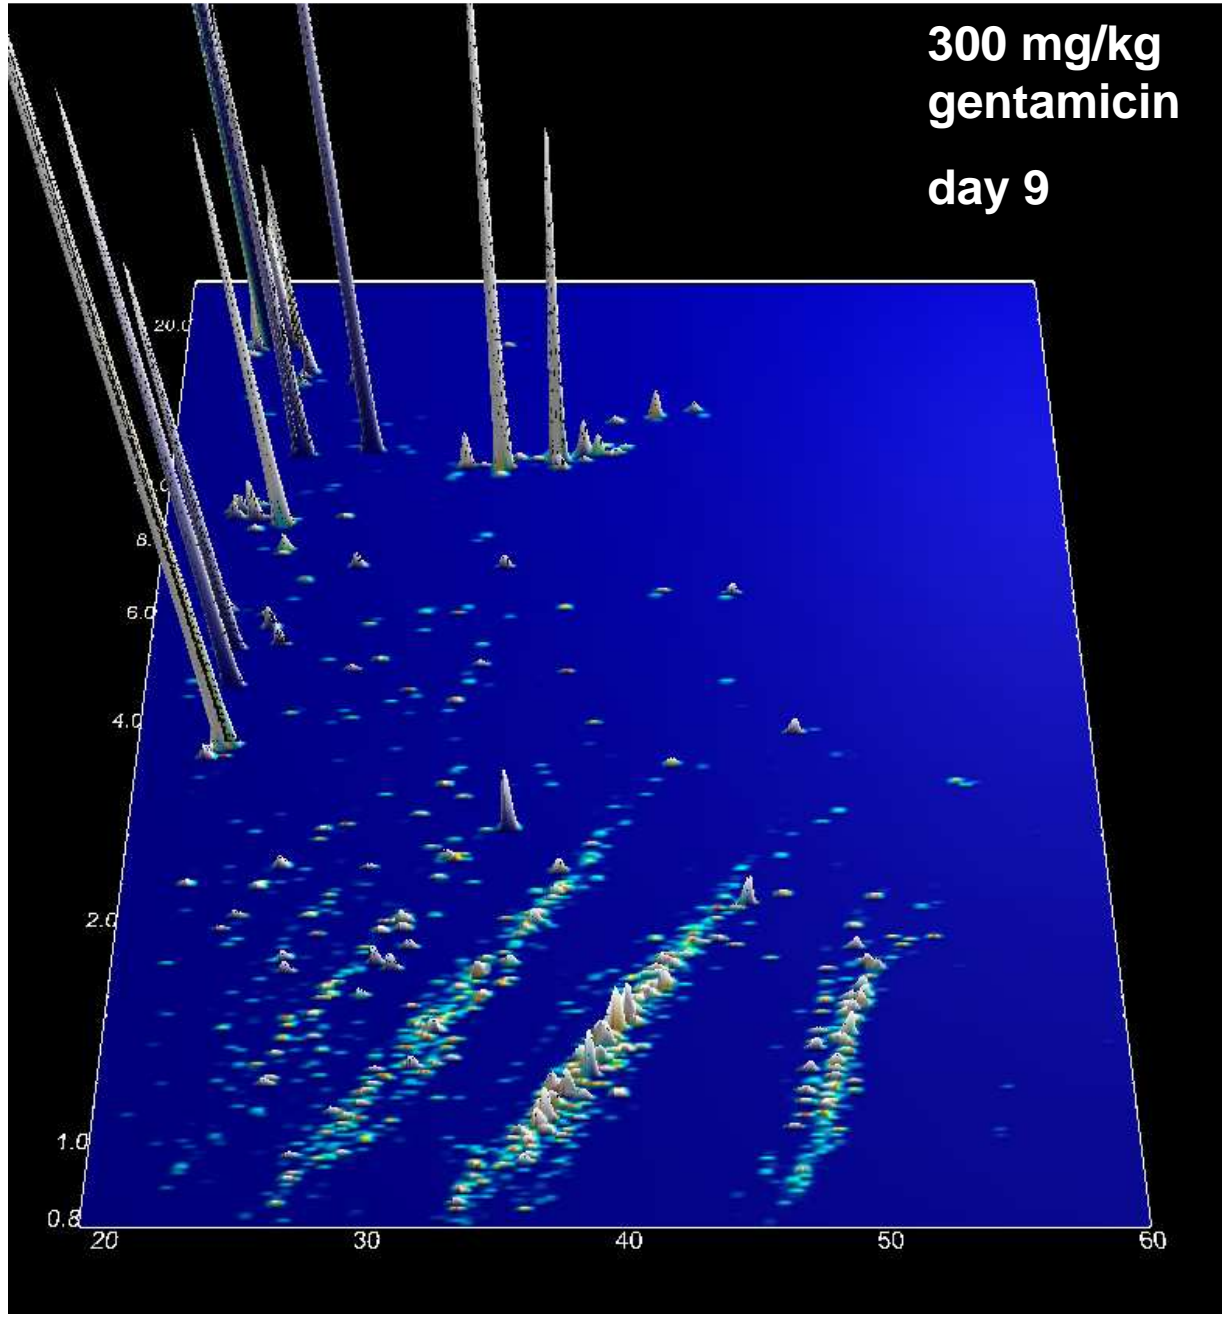

CE-time [min]

**300 mg/kg  
gentamicin  
day 15**

Mass  
[kDa]

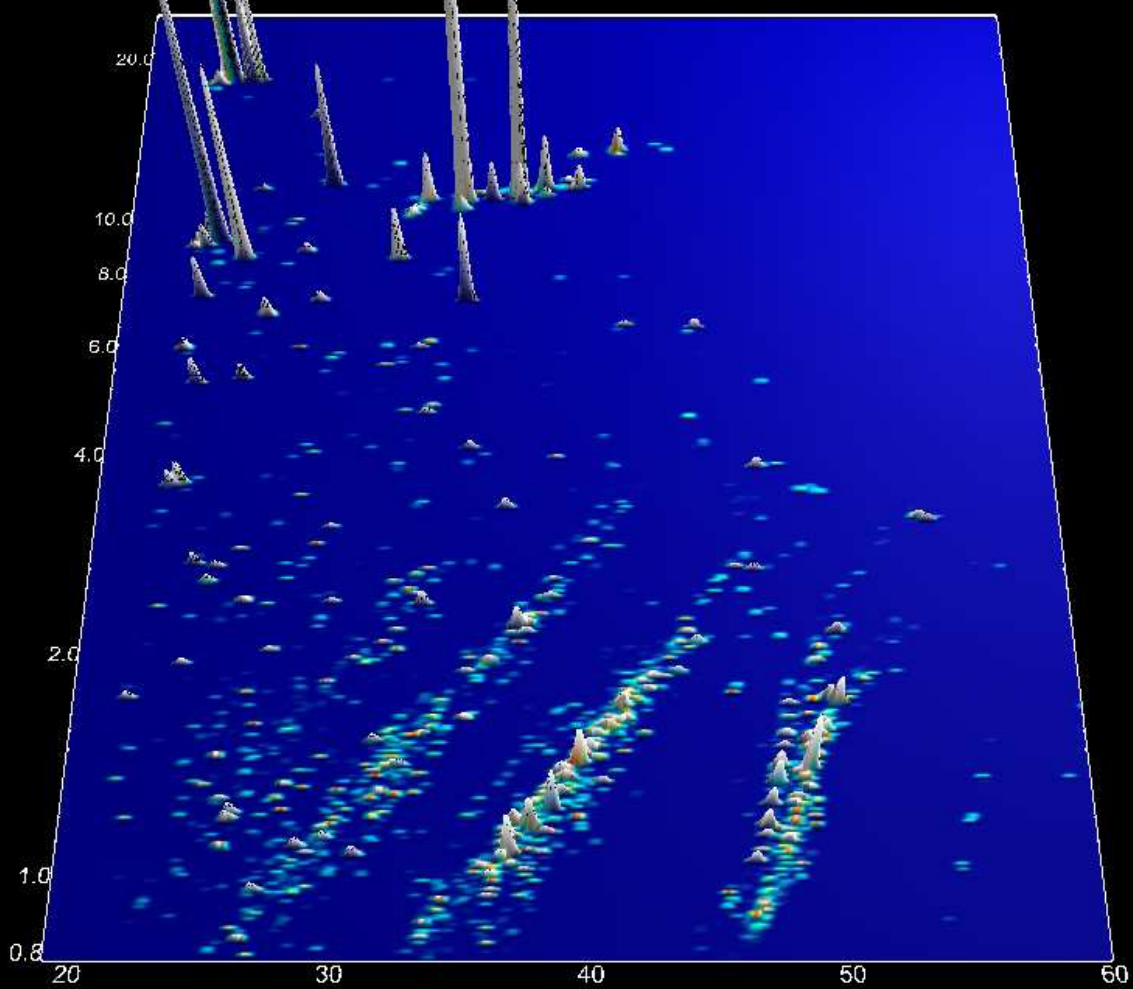

CE-time [min]



300 mg/kg  
gentamicin  
day 18

Mass [kDa]

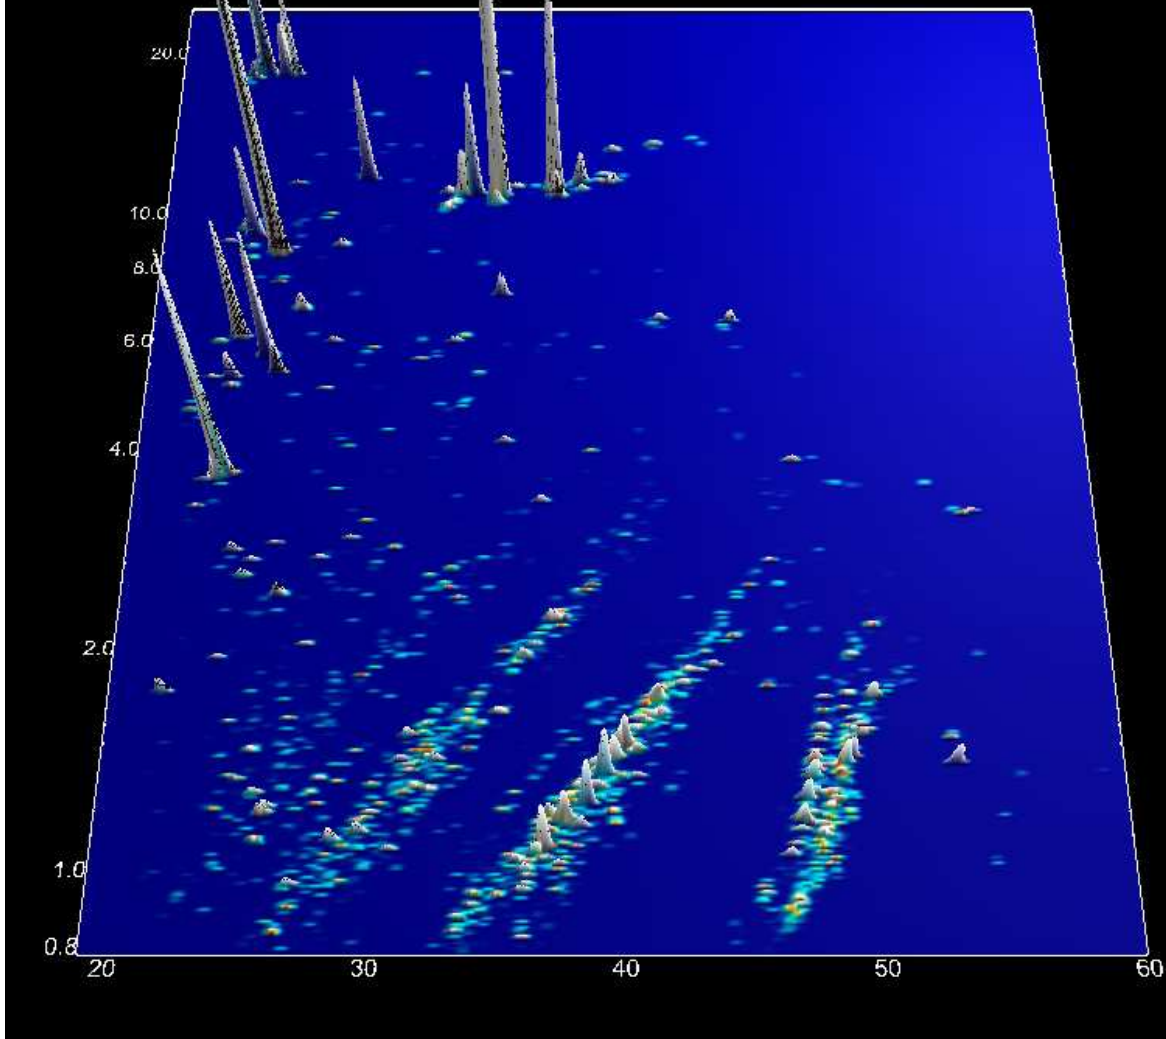

CE-time [min]

300 mg/kg  
gentamicin  
day 22

Mass [kDa]

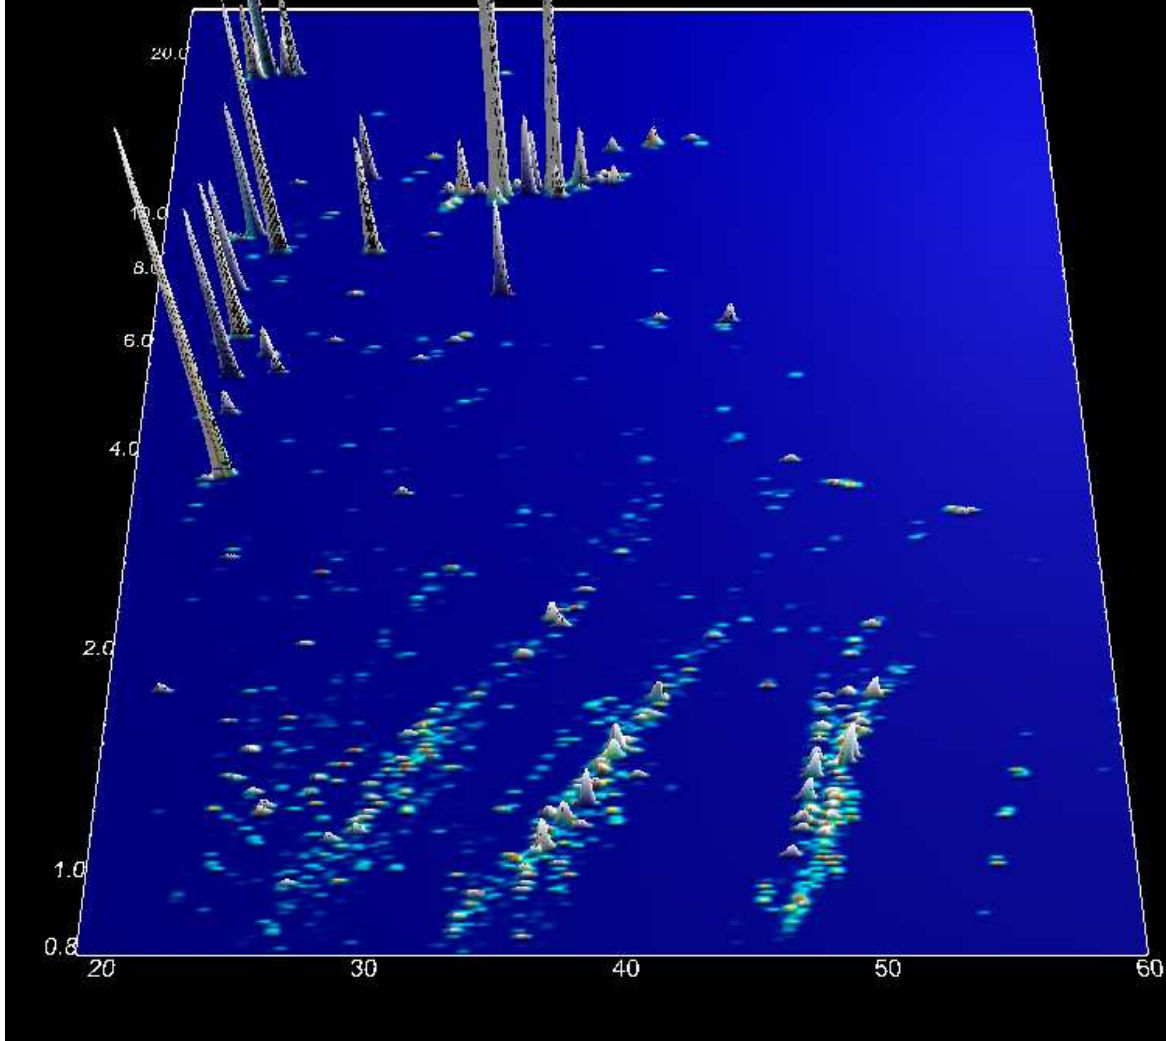

CE-time [min]

**300 mg/kg  
gentamicin  
day 29**

Mass  
[kDa]

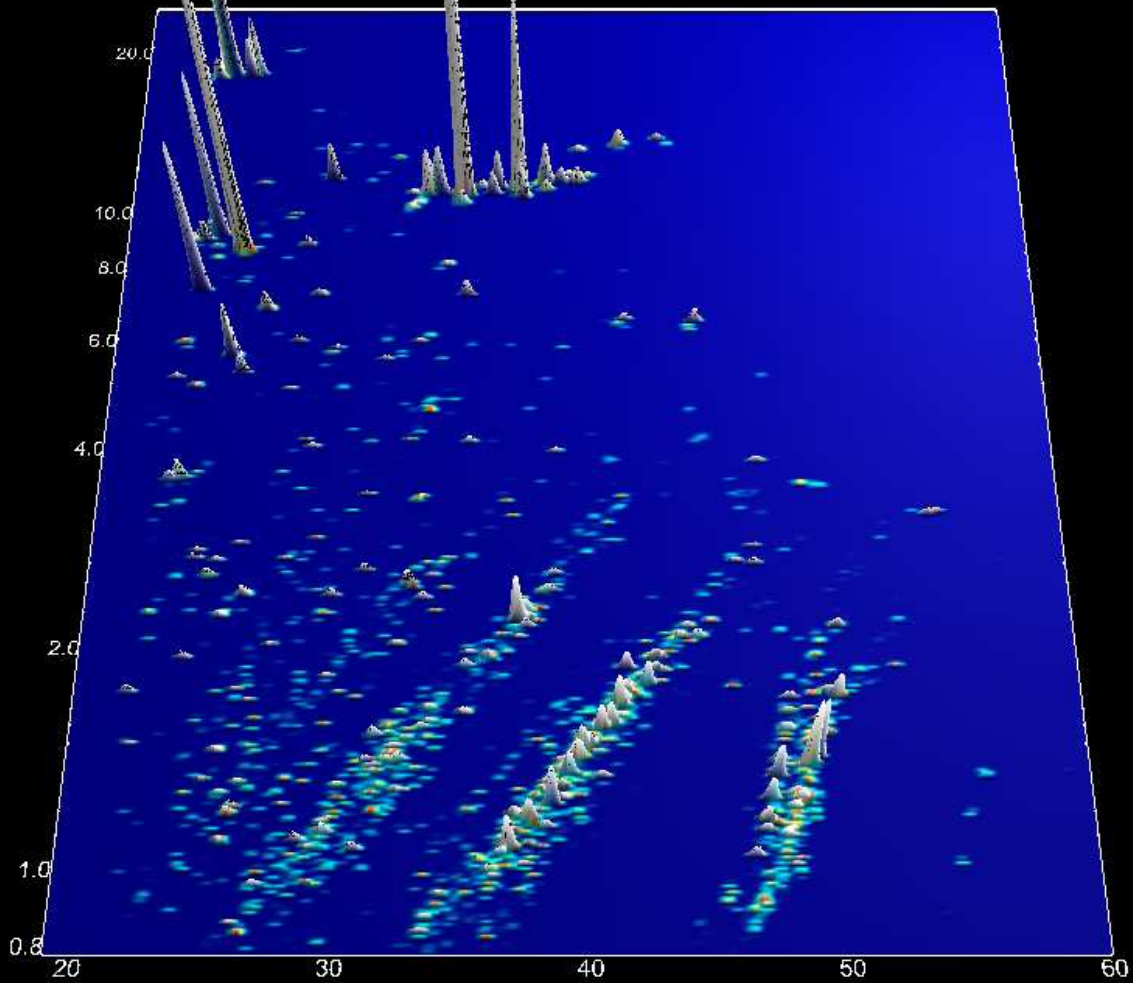

CE-time [min]

**300 mg/kg  
gentamicin  
day 36**

Mass  
[kDa]

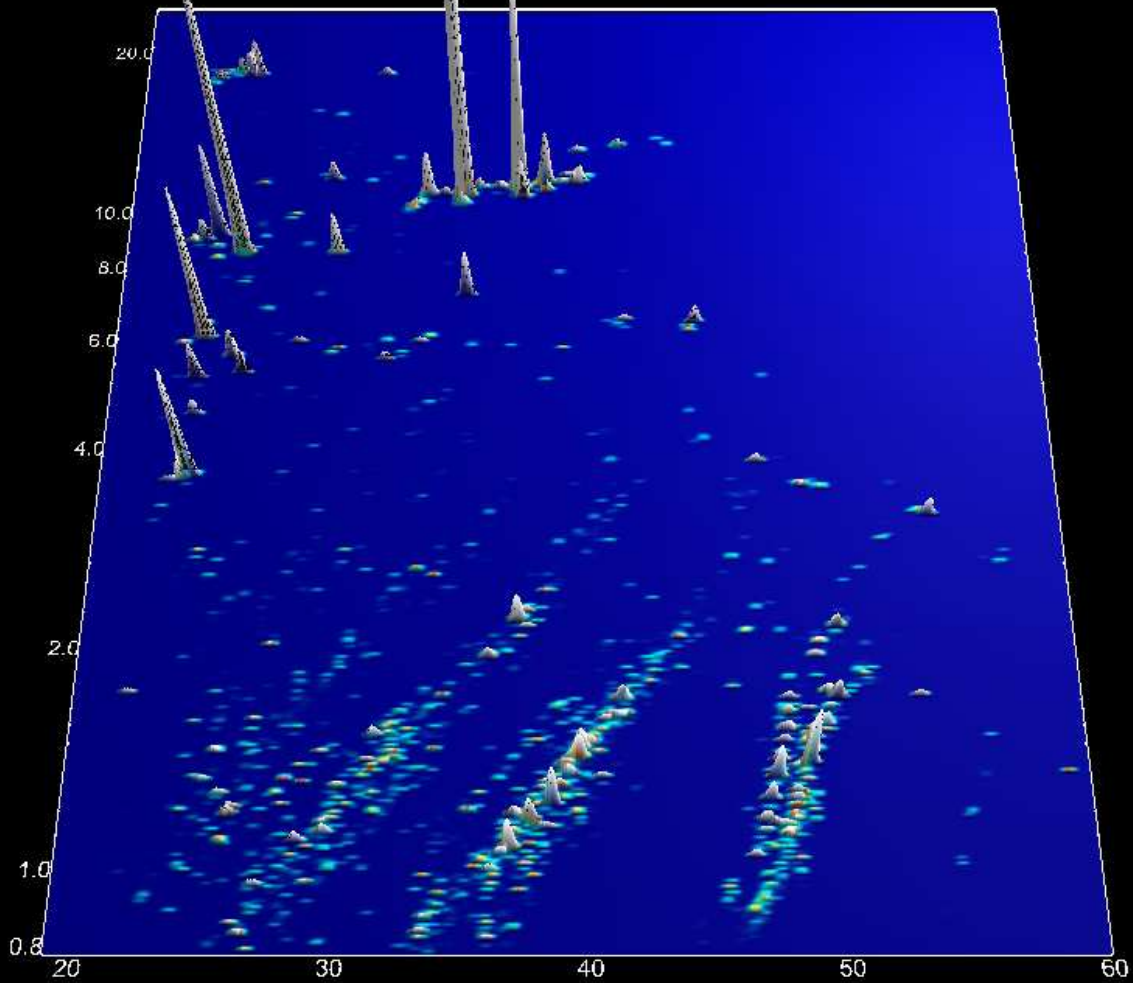

CE-time [min]

300 mg/kg  
gentamicin  
day 44

Mass  
[kDa]

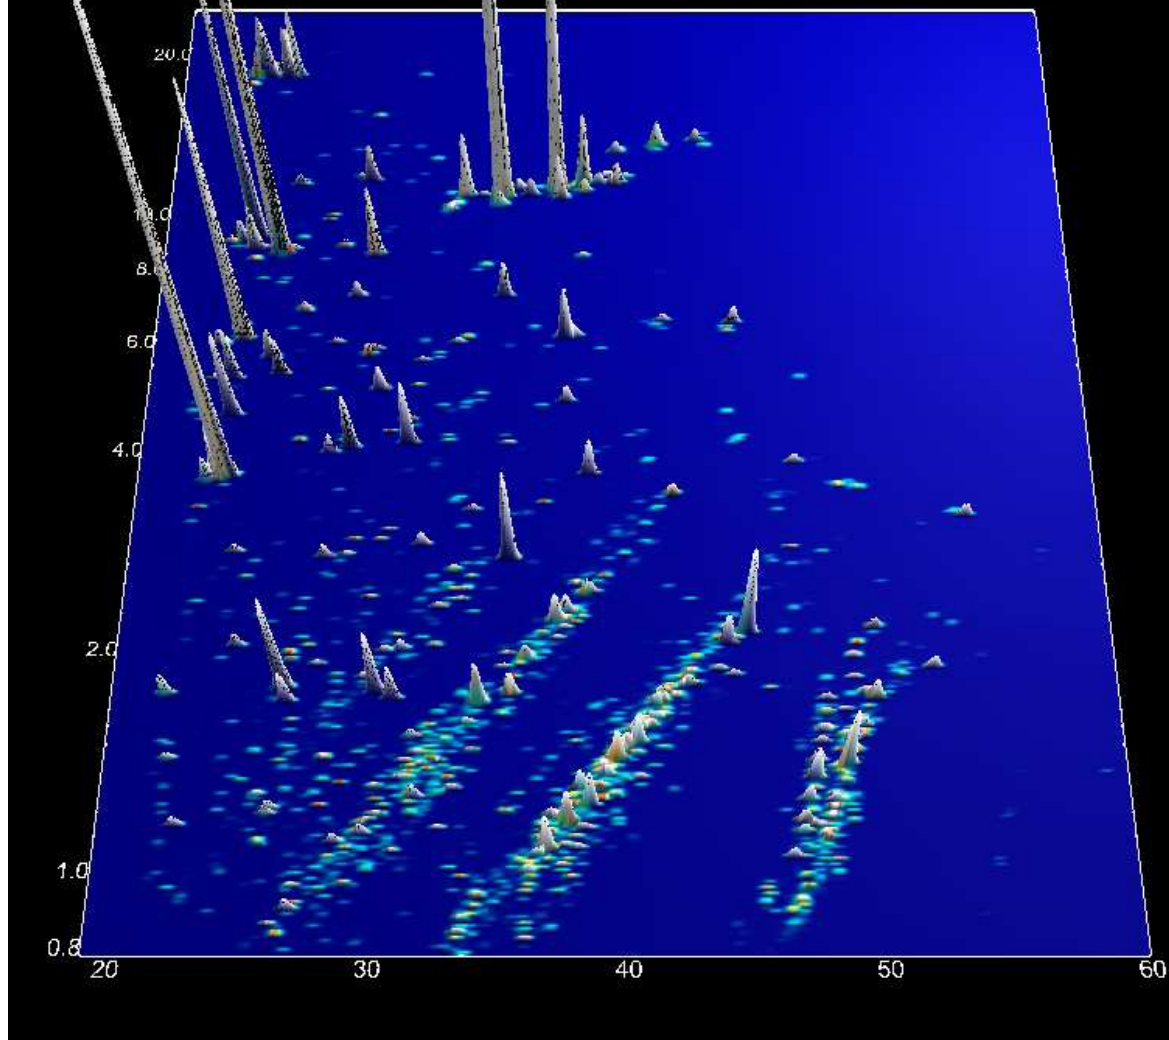

CE-time [min]
